# Supplementary material for: Low-dose exposure to bisphenols A, F and S of human primary adipocyte impacts coding and non-coding RNA profiles
Source: PLoS One. 2017 Jun 19;12(6):e0179583. doi: 10.1371/journal.pone.0179583 (PMC5476258; doi:10.1371/journal.pone.0179583)
Supplement: S2 Table — Gene names (A) or miRNA symbols (B) have been determined with IPA. D indicates the presence of a duplication: two different probes are tagging the same gene. Fold changes (FC) are actually log2 transformed fold changes (log2FC), therefore if a FC is positive the probe is over-expressed in the tested condition compared to the control, whereas it is under-expressed when a FC is negative. In addition, when a FC is equal to +1 or -1, the probe is twice as over or under-expressed. P-values are corrected for multiple testing using Benjamini and Hochberg’s method to control the false discovery rate with a 5% threshold. Long intergenic non-coding RNAs data are displayed with a blue filing and small nucleolar RNAs data are displayed with a pink filing. ID corresponds to the probe id. (XLSX) [file pone.0179583.s006.xlsx]

## Sheet: RNA BPA at 10 nM
ID	Duplication	Symbol	Gene Name	log2FC	Pvalue
A_33_P3423700		LOC100131829	uncharacterized LOC100131829	-0.496	2.55e-07
A_19_P00803019	D	PWAR6	Prader Willi/Angelman region RNA 6	-0.47	5.69e-07
A_33_P3308481		HYMAI	hydatidiform mole associated and imprinted (non-protein coding)	-0.695	1.35e-06
A_32_P83465	D	NBPF15 (includes others)	neuroblastoma breakpoint family member 15	-0.429	1.95e-06
A_21_P0006998				-0.521	2.33e-06
A_19_P00317023	D	PVT1	Pvt1 oncogene (non-protein coding)	-0.733	2.37e-06
A_33_P3236030		ARHGAP24	Rho GTPase activating protein 24	-0.489	2.39e-06
A_33_P3244998		ODF2L	outer dense fiber of sperm tails 2-like	-0.55	2.54e-06
A_23_P108932		RPL23AP32	ribosomal protein L23a pseudogene 32	-0.691	2.65e-06
A_33_P3789693				-0.895	2.69e-06
A_33_P3252612		CYP2W1	cytochrome P450 family 2 subfamily W member 1	-0.384	3.52e-06
A_19_P00320028	D	LINC01004	long intergenic non-protein coding RNA 1004	-0.535	3.74e-06
A_33_P3256695		PRPF40A	pre-mRNA processing factor 40 homolog A	-0.484	5.53e-06
A_19_P00800681	D	PWAR6	Prader Willi/Angelman region RNA 6	-0.388	5.65e-06
A_23_P70307	D	SMOC2	SPARC related modular calcium binding 2	0.384	5.96e-06
A_19_P00804777		LINC00662	long intergenic non-protein coding RNA 662	-0.542	7.4e-06
A_23_P120125		COLEC11	collectin subfamily member 11	0.223	7.66e-06
A_33_P3275255				-0.528	8.41e-06
A_21_P0005657				-0.477	8.47e-06
A_33_P3354945	D	CSF1	colony stimulating factor 1	0.278	9.32e-06
A_33_P3210288		FUT6	fucosyltransferase 6	-0.37	1.24e-05
A_19_P00316844	D	HCG18	HLA complex group 18 (non-protein coding)	-0.348	1.25e-05
A_21_P0000336		SNORA54	small nucleolar RNA, H/ACA box 54	0.409	1.28e-05
A_33_P3325558		RABGAP1L	RAB GTPase activating protein 1-like	-0.693	1.31e-05
A_19_P00801585				-0.517	1.4e-05
A_19_P00315603				-0.755	1.4e-05
A_19_P00800555				-0.64	1.41e-05
A_33_P3310232		L2HGDH	L-2-hydroxyglutarate dehydrogenase	-0.611	1.52e-05
A_33_P3522511				-0.569	1.56e-05
A_33_P3315763				-0.357	1.64e-05
A_33_P3481987		SLC16A12	solute carrier family 16 member 12	-0.348	1.77e-05
A_33_P3567967		LOC55338	uncharacterized LOC55338	-0.595	2.03e-05
A_24_P83379		WDFY3	WD repeat and FYVE domain containing 3	-0.244	2.16e-05
A_19_P00320721	D	MDM4	MDM4, p53 regulator	-0.431	2.38e-05
A_23_P54447		LINC00597	long intergenic non-protein coding RNA 597	-0.527	2.45e-05
A_19_P00325912	D	HCG18	HLA complex group 18 (non-protein coding)	-0.321	2.5e-05
A_33_P3280066		PTRF	polymerase I and transcript release factor	-0.431	2.6e-05
A_32_P48615		LOC100128108	putative ubiquitin-conjugating enzyme E2Q2-like protein	-0.489	2.61e-05
A_33_P3340254		KMT2D	lysine (K)-specific methyltransferase 2D	-0.236	3.07e-05
A_33_P3341722				-0.345	3.2e-05
A_23_P373521		HAND2	heart and neural crest derivatives expressed 2	0.199	3.21e-05
A_32_P120604		SNX29	sorting nexin 29	-0.607	3.46e-05
A_33_P3228252				-0.673	3.75e-05
A_33_P3337277		LOC100129846	uncharacterized LOC100129846	-0.353	3.96e-05
A_33_P3645805		LOC149401	uncharacterized LOC149401	-0.542	3.96e-05
A_33_P3410831		LOC729609	uncharacterized LOC729609	-0.455	4.17e-05
A_23_P156807		CFLAR	CASP8 and FADD like apoptosis regulator	-0.411	4.29e-05
A_33_P3382105				-0.499	4.42e-05
A_33_P3762918	D	LINC01004	long intergenic non-protein coding RNA 1004	-0.511	4.76e-05
A_23_P44139		PRIM2	primase, DNA, polypeptide 2 (58kDa)	0.216	4.81e-05
A_33_P3266165				-0.404	4.83e-05
A_33_P3356525				-0.633	4.87e-05
A_33_P3802146	D	LINC00504		-0.574	4.99e-05
A_23_P210131				-0.389	5.13e-05
A_24_P161293	D	NBPF15 (includes others)	neuroblastoma breakpoint family member 15	-0.424	5.14e-05
A_33_P3278911	D	PHF20L1	PHD finger protein 20-like 1	-0.326	5.15e-05
A_19_P00802872	D	XIST	X inactive specific transcript (non-protein coding)	-0.473	5.22e-05
A_24_P615822		BMS1	BMS1, ribosome biogenesis factor	-0.402	5.49e-05
A_21_P0011938	D	ANKRD36B	ankyrin repeat domain 36B	-0.377	5.58e-05
A_33_P3328619				-0.477	5.71e-05
A_33_P3382147		STARD13	StAR related lipid transfer domain containing 13	-0.505	5.74e-05
A_33_P3327697		LOC145474	uncharacterized LOC145474	-0.485	6.41e-05
A_33_P3349474				-0.458	6.67e-05
A_21_P0013548				-0.395	6.69e-05
A_21_P0000222		SNORD46	small nucleolar RNA, C/D box 46	0.335	7.21e-05
A_33_P3268900		BNIP3L	BCL2/adenovirus E1B 19kDa interacting protein 3-like	-0.586	7.25e-05
A_21_P0012995				-0.683	7.32e-05
A_33_P3280044		ANKRD11	ankyrin repeat domain 11	-0.227	7.52e-05
A_33_P3219720		ZNF248	zinc finger protein 248	-0.51	8.12e-05
A_33_P3503937		LOC284581	uncharacterized LOC284581	-0.651	8.3e-05
A_19_P00315601				-0.687	8.34e-05
A_23_P40866		ZBTB20	zinc finger and BTB domain containing 20	-0.422	9.56e-05
A_33_P3371752		EPS15	epidermal growth factor receptor pathway substrate 15	-0.555	0.000102
A_33_P3233000				-0.437	0.000105
A_33_P3404097		PGM5P2	phosphoglucomutase 5 pseudogene 2	-0.586	0.000105
A_19_P00318715	D	LINC-PINT	long intergenic non-protein coding RNA, p53 induced transcript	-0.282	0.000111
A_33_P3827416		CTGLF12P	ArfGAP with GTPase domain, ankyrin repeat and PH domain 12, pseudogene	-0.463	0.000112
A_33_P3373433				0.414	0.000113
A_33_P3870056		LOC283335	uncharacterized LOC283335	0.475	0.000117
A_21_P0003456				0.378	0.000124
A_21_P0014915				0.32	0.000128
A_33_P3384442		LAMA5	laminin subunit alpha 5	-0.529	0.000128
A_33_P3397795		PCNXL4	pecanex-like 4 (Drosophila)	-0.547	0.000131
A_23_P26223		ASL	argininosuccinate lyase	-0.134	0.000132
A_24_P237757		ZMYM2	zinc finger, MYM-type 2	-0.547	0.000133
A_33_P3280502				-0.569	0.000135
A_32_P171181	D	NBPF15 (includes others)	neuroblastoma breakpoint family member 15	-0.302	0.000137
A_21_P0010724	D	LOC645166	lymphocyte-specific protein 1 pseudogene	-0.303	0.000138
A_33_P3320393		MRPS16	mitochondrial ribosomal protein S16	-0.379	0.000146
A_33_P3368186				-0.41	0.000147
A_33_P3366073		EBPL	emopamil binding protein-like	-0.344	0.00016
A_33_P3363515		XRCC3	X-ray repair complementing defective repair in Chinese hamster cells 3	-0.414	0.00016
A_33_P3235432		NMNAT1	nicotinamide nucleotide adenylyltransferase 1	0.507	0.000163
A_33_P3219055		C15orf61	chromosome 15 open reading frame 61	0.165	0.000171
A_19_P00318533	D	HOOK3	hook microtubule-tethering protein 3	-0.158	0.000173
A_33_P3299766		FAM160B1	family with sequence similarity 160 member B1	-0.395	0.000176
A_33_P3220437		TNFAIP8L1	TNF alpha induced protein 8 like 1	-0.528	0.000176
A_21_P0000745		TTN-AS1	TTN antisense RNA 1	-0.344	0.000176
A_19_P00805705	D	HECTD4	HECT domain containing E3 ubiquitin protein ligase 4	-0.245	0.000177
A_33_P3313660		BRD7P3	bromodomain containing 7 pseudogene 3	-0.377	0.000179
A_33_P3363485		SOBP	sine oculis binding protein homolog	-0.261	0.00018
A_33_P3354935	D	CSF1	colony stimulating factor 1	0.194	0.000186
A_33_P3351416	D	SMOC2	SPARC related modular calcium binding 2	0.381	0.00019
A_21_P0011383		UBE2Q2P2	ubiquitin conjugating enzyme E2Q family member 2 pseudogene 2	-0.28	0.000191
A_33_P3360072		RANBP3L	RAN binding protein 3-like	0.311	0.000192
A_21_P0004242		LOC101926940	uncharacterized LOC101926940	0.355	0.000196
A_33_P3358158		CRYBB2P1	crystallin beta B2 pseudogene 1	-0.434	0.000201
A_33_P3762913	D	LINC01004	long intergenic non-protein coding RNA 1004	-0.464	0.000206
A_33_P3236267	D	LINC00504		-0.545	0.000208
A_21_P0012080				-0.582	0.000211
A_33_P3337719		LOC100134868	uncharacterized LOC100134868	-0.516	0.000211
A_32_P53524		NTN1	netrin 1	0.274	0.000212
A_23_P216038	D	PHF20L1	PHD finger protein 20-like 1	-0.328	0.000212
A_33_P3405285		GSG1	germ cell associated 1	-0.593	0.000215
A_33_P3711318		LOC257152	uncharacterized LOC257152	-0.381	0.000222
A_21_P0010774				-0.425	0.000225
A_33_P3324333		ANKRD20A5P	ankyrin repeat domain 20 family member A5, pseudogene	-0.375	0.000225
A_21_P0003091				-0.507	0.000226
A_33_P3877728		SMCR6	Smith-Magenis syndrome chromosome region, candidate 6 (non-protein coding)	-0.505	0.000226
A_33_P3400324		PHC3	polyhomeotic homolog 3 (Drosophila)	-0.182	0.000227
A_33_P3410251		UNC80	unc-80 homolog, NALCN activator	-0.339	0.000227
A_33_P3721983				-0.425	0.00023
A_33_P3214129				-0.584	0.000241
A_23_P205575		GPR135	G protein-coupled receptor 135	-0.427	0.000252
A_33_P3231005				-0.589	0.000254
A_23_P215669		POLR2J2/POLR2J3	polymerase (RNA) II (DNA directed) polypeptide J3	0.534	0.000255
A_33_P3255499		SLC25A51	solute carrier family 25 member 51	-0.501	0.000265
A_33_P3330716		INO80D	INO80 complex subunit D	-0.255	0.000267
A_24_P366777		LOC100996763/NOTCH2NL	notch 2 N-terminal like	-0.333	0.000267
A_23_P22352		FRMD4A	FERM domain containing 4A	-0.478	0.000276
A_21_P0012391		LOC101927056	uncharacterized LOC101927056	-0.447	0.000276
A_24_P232790		CCDC177	coiled-coil domain containing 177	0.445	0.000281
A_23_P133474	D	GPX3	glutathione peroxidase 3	0.252	0.000281
A_23_P117971				-0.66	0.000282
A_33_P3365878		BMP8B	bone morphogenetic protein 8b	-0.51	0.000285
A_33_P3309231		HSCB	HscB mitochondrial iron-sulfur cluster co-chaperone	-0.229	0.000289
A_21_P0012300				-0.334	0.000293
A_33_P3327519		SNORA74A	small nucleolar RNA, H/ACA box 74A	-0.266	0.000293
A_19_P00320579	D	LINC-PINT	long intergenic non-protein coding RNA, p53 induced transcript	-0.311	0.000293
A_23_P331908		LOC101060179	uncharacterized LOC101060179	0.235	0.000297
A_21_P0000365		SNORD12	small nucleolar RNA, C/D box 12	0.316	0.000298
A_33_P3228988		LOC105372277	zinc finger protein 799-like	-0.418	0.000299
A_33_P3265606		GCLM	glutamate-cysteine ligase, modifier subunit	-0.527	0.0003
A_23_P307310		ACAN	aggrecan	-0.488	0.000301
A_23_P259357		SLC35E4	solute carrier family 35 member E4	-0.43	0.000302
A_21_P0014541				-0.54	0.00031
A_21_P0014584				-0.599	0.000316
A_24_P204144				-0.151	0.000317
A_33_P3379436		FAM74A4	family with sequence similarity 74 member A4	-0.195	0.00032
A_21_P0010877	D	BMS1P5	BMS1, ribosome biogenesis factor pseudogene 5	-0.408	0.000324
A_23_P203391		ASRGL1	asparaginase like 1	-0.484	0.000327
A_33_P3331588	D	ATAD3B	ATPase family, AAA domain containing 3B	-0.222	0.000329
A_33_P3559138				-0.42	0.000335
A_21_P0003093				-0.376	0.000347
A_24_P940310		URB1	URB1 ribosome biogenesis 1 homolog (S. cerevisiae)	-0.294	0.000348
A_33_P3274428				-0.471	0.000359
A_23_P48740		DIO2	deiodinase, iodothyronine, type II	0.302	0.000367
A_21_P0000591		SNORA70F	small nucleolar RNA, H/ACA box 70F	-0.22	0.00038
A_33_P3293114	D	SRSF11	serine/arginine-rich splicing factor 11	-0.219	0.000381
A_33_P3360887		HELZ2	helicase with zinc finger 2, transcriptional coactivator	-0.484	0.00039
A_23_P431569		LOC100049716	uncharacterized LOC100049716	0.196	0.000401
A_33_P3369371	D	GPX3	glutathione peroxidase 3	0.355	0.000408
A_33_P3287105				0.584	0.000409
A_24_P693321		LOC100190986	uncharacterized LOC100190986	-0.668	0.000409
A_33_P3708364		LOC644285	uncharacterized LOC644285	-0.18	0.00041
A_24_P179183	D	ANKRD12	ankyrin repeat domain 12	-0.179	0.000415
A_33_P3351934		MSTO1	misato 1, mitochondrial distribution and morphology regulator	-0.48	0.000416
A_33_P3225696		ZNF526	zinc finger protein 526	-0.444	0.00042
A_33_P3367899		FRAT1	frequently rearranged in advanced T-cell lymphomas 1	0.279	0.000421
A_21_P0003208				-0.521	0.000432
A_33_P3321678		RNF180	ring finger protein 180	-0.5	0.000433
A_33_P3321657	D	HSPG2	heparan sulfate proteoglycan 2	-0.367	0.000439
A_33_P3301381		RBM43	RNA binding motif protein 43	-0.455	0.00044
A_33_P3471712		LOC284600	uncharacterized LOC284600	-0.175	0.000444
A_21_P0000500		SNORD86	small nucleolar RNA, C/D box 86	-0.229	0.000447
A_33_P3349469		ATAD3A	ATPase family, AAA domain containing 3A	-0.188	0.000448
A_33_P3209522		SLFN5	schlafen family member 5	-0.34	0.00045
A_33_P3421219		LOC647070	uncharacterized LOC647070	-0.529	0.000451
A_23_P90143		RPL13A	ribosomal protein L13a	-0.165	0.000452
A_33_P3759592		FLJ13773	uncharacterized LOC246318	-0.417	0.000454
A_32_P10133		PRINS	psoriasis associated non-protein coding RNA induced by stress	-0.492	0.000457
A_23_P72584		ACBD7	acyl-CoA binding domain containing 7	0.402	0.000458
A_24_P136182	D	RPS2P32	ribosomal protein S2 pseudogene 32	-0.151	0.00046
A_33_P3274930				-0.304	0.000469
A_23_P53198		DGAT2	diacylglycerol O-acyltransferase 2	-0.255	0.000473
A_33_P3292179		ABCA9	ATP binding cassette subfamily A member 9	-0.455	0.00048
A_33_P3306616		C5orf28	chromosome 5 open reading frame 28	-0.538	0.000503
A_21_P0009155	D	SRSF1	serine/arginine-rich splicing factor 1	-0.512	0.000512
A_24_P235783		SF1	splicing factor 1	-0.506	0.000516
A_32_P66035		TMEM86A	transmembrane protein 86A	0.255	0.000518
A_33_P3356210	D	NCR3LG1	natural killer cell cytotoxicity receptor 3 ligand 1	-0.222	0.000519
A_33_P3451157		LINC00937	long intergenic non-protein coding RNA 937	-0.546	0.000524
A_21_P0000366		SNORD11	small nucleolar RNA, C/D box 11	-0.275	0.000529
A_33_P3514859		LOC101929709	uncharacterized LOC101929709	-0.29	0.00053
A_33_P3537875				-0.514	0.000534
A_33_P3278407		MLLT4	myeloid/lymphoid or mixed-lineage leukemia; translocated to, 4	-0.189	0.00054
A_21_P0001673				-0.299	0.000541
A_21_P0012246				-0.452	0.000543
A_33_P3362326		FHL2	four and a half LIM domains 2	-0.453	0.000543
A_33_P3241596				-0.727	0.000546
A_24_P339429		KCNJ12	potassium channel, inwardly rectifying subfamily J, member 12	0.223	0.000546
A_33_P3212823	D	NPIPB3 (includes others)	nuclear pore complex interacting protein family, member B3	-0.593	0.00055
A_23_P218892		EIF4G1	eukaryotic translation initiation factor 4 gamma, 1	-0.116	0.000552
A_24_P2648	D	PTPN14	protein tyrosine phosphatase, non-receptor type 14	-0.171	0.000558
A_24_P238250		LGALS7/LGALS7B	lectin, galactoside-binding, soluble, 7	-0.739	0.000564
A_33_P3332690	D	SUZ12P1	SUZ12 polycomb repressive complex 2 subunit pseudogene 1	-0.438	0.000567
A_21_P0014132				-0.177	0.000568
A_33_P3280993	D	HCG18	HLA complex group 18 (non-protein coding)	-0.26	0.000586
A_21_P0012393				-0.65	0.00059
A_33_P3415617				0.443	0.000601
A_33_P3335624		PSMD10	proteasome 26S subunit, non-ATPase 10	-0.581	0.000601
A_23_P8797		PMS2P2	PMS1 homolog 2, mismatch repair system component pseudogene 2	-0.229	0.000607
A_33_P3340639		GPAM	glycerol-3-phosphate acyltransferase, mitochondrial	-0.656	0.00061
A_33_P3296852	D	LOC729162	uncharacterized LOC729162	-0.18	0.000618
A_33_P3209176				-0.563	0.000622
A_23_P218784		DDX17	DEAD-box helicase 17	-0.367	0.000624
A_24_P729905	D	AGAP6 (includes others)	ArfGAP with GTPase domain, ankyrin repeat and PH domain 5	-0.385	0.000626
A_33_P3239267		FAM212A	family with sequence similarity 212 member A	-0.429	0.000627
A_24_P167877	D	NPIPB3 (includes others)	nuclear pore complex interacting protein family, member B3	-0.68	0.000636
A_23_P86100		KLHDC9	kelch domain containing 9	0.277	0.000638
A_23_P164022		MYO1C	myosin IC	-0.38	0.000643
A_21_P0014028				-0.578	0.000652
A_19_P00322190		RP9P	retinitis pigmentosa 9 pseudogene	-0.885	0.000657
A_23_P389907		ATXN2	ataxin 2	-0.141	0.000671
A_21_P0000584		VTRNA2-1	vault RNA 2-1	0.31	0.000671
A_33_P3380625	D	HSPG2	heparan sulfate proteoglycan 2	-0.431	0.000672
A_21_P0006569		LOC102724491	uncharacterized LOC102724491	-0.525	0.000686
A_23_P500985		PAX7	paired box 7	0.235	0.000693
A_21_P0010981	D	MALAT1	metastasis associated lung adenocarcinoma transcript 1 (non-protein coding)	-0.323	0.000701
A_33_P3752697				-0.473	0.000703
A_33_P3365010		ELK4	ELK4, ETS-domain protein (SRF accessory protein 1)	0.218	0.000715
A_33_P3678883				-0.474	0.00072
A_33_P3419938		VHL	von Hippel-Lindau tumor suppressor, E3 ubiquitin protein ligase	-0.309	0.000721
A_21_P0000298		SNORD8	small nucleolar RNA, C/D box 8	0.223	0.00073
A_33_P3381305				-0.296	0.000735
A_33_P3380837		AMZ1	archaelysin family metallopeptidase 1	-0.606	0.000737
A_23_P426636	D	AHNAK	AHNAK nucleoprotein	-0.264	0.000743
A_21_P0014700		LOC105372482	uncharacterized LOC105372482	-0.437	0.000748
A_33_P3787904		LOC100506679	uncharacterized LOC100506679	-0.43	0.000755
A_24_P148235		RPS27	ribosomal protein S27	-0.134	0.000761
A_33_P3260307		CARHSP1	calcium regulated heat stable protein 1	0.18	0.000772
A_23_P35456	D	SH3PXD2A	SH3 and PX domains 2A	-0.236	0.000777
A_33_P3395403	D	LOC100996724	phosphodiesterase 4D interacting protein-like	-0.191	0.000781
A_33_P3407937		PLCXD1	phosphatidylinositol-specific phospholipase C, X domain containing 1	-0.263	0.000784
A_33_P3323041		KANK1	KN motif and ankyrin repeat domains 1	-0.362	0.000788
A_33_P3415500	D	TRIO	trio Rho guanine nucleotide exchange factor	-0.189	0.000795
A_19_P00321089	D	LINC00963	long intergenic non-protein coding RNA 963	0.204	0.000808
A_21_P0010879	D	BMS1P5	BMS1, ribosome biogenesis factor pseudogene 5	-0.367	0.00082
A_21_P0013977		PCID2	PCI domain containing 2	-0.395	0.000831
A_23_P208706		BAX	BCL2-associated X protein	-0.257	0.000838
A_33_P3233170				-0.31	0.000842
A_23_P144531		ALPK1	alpha kinase 1	-0.586	0.000848
A_23_P157196	D	RPS2P32	ribosomal protein S2 pseudogene 32	-0.153	0.000853
A_33_P3276142	D	DNM1P46	dynamin 1 pseudogene 46	-0.272	0.00086
A_33_P3232624		LOC100288069	uncharacterized LOC100288069	-0.332	0.000864
A_23_P339053		C16orf52	chromosome 16 open reading frame 52	-0.149	0.00087
A_33_P3259821		DOCK9	dedicator of cytokinesis 9	0.188	0.000878
A_21_P0008919				-0.5	0.000881
A_33_P3288104		DAAM2	dishevelled associated activator of morphogenesis 2	0.244	0.000891
A_24_P943393	D	AHNAK	AHNAK nucleoprotein	-0.209	0.000904
A_33_P3226237	D	ABI2	abl-interactor 2	-0.493	0.000905
A_33_P3319640		HDGFRP2	hepatoma-derived growth factor-related protein 2	0.399	0.000905
A_33_P3414689				-0.5	0.000912
A_23_P201567		PRPF38B	pre-mRNA processing factor 38B	-0.179	0.000917
A_33_P3345743		PFN1P2	profilin 1 pseudogene 2	-0.512	0.000917
A_21_P0012235				-0.301	0.000923
A_21_P0014252		ZEB1-AS1	ZEB1 antisense RNA 1	0.176	0.00093
A_33_P3339820		LEPR	leptin receptor	-0.247	0.000933
A_33_P3327986				-0.548	0.000937
A_33_P3274528		C9orf153	chromosome 9 open reading frame 153	-0.395	0.00094
A_21_P0011021		TSSC2	tumor suppressing subtransferable candidate 2 pseudogene	-0.548	0.00094
A_19_P00318531	D	HOOK3	hook microtubule-tethering protein 3	-0.149	0.000945
A_33_P3305117				-0.513	0.000949
A_33_P3224971				-0.5	0.000951
A_33_P3392366		LOC101929634	keratin-associated protein 5-1-like	-0.377	0.000952
A_23_P258698		MANBA	mannosidase, beta A, lysosomal	0.149	0.000952
A_33_P3613358				0.396	0.000956
A_21_P0011939				-0.43	0.000962
A_21_P0014729		POLR2J4	polymerase (RNA) II (DNA directed) polypeptide J4, pseudogene	-0.357	0.000966
A_21_P0000739		LOC100288637	OTU deubiquitinase 7A pseudogene	-0.236	0.000972
A_33_P3243399		SLMAP	sarcolemma associated protein	-0.358	0.000978
A_19_P00329511	D	XIST	X inactive specific transcript (non-protein coding)	-0.497	0.00098
A_19_P00323413	D	PTPN14	protein tyrosine phosphatase, non-receptor type 14	-0.159	0.000997
A_33_P3336223				0.503	0.001
A_21_P0002693				-0.448	0.00101
A_33_P3422429		INADL	InaD-like (Drosophila)	-0.332	0.00101
A_33_P3263538	D	NEAT1	nuclear paraspeckle assembly transcript 1 (non-protein coding)	-1.171	0.00102
A_33_P3370812		TBC1D1	TBC1 domain family member 1	-0.304	0.00102
A_33_P3349395		CECR2	cat eye syndrome chromosome region, candidate 2	-0.357	0.00104
A_23_P109907		ILDR1	immunoglobulin-like domain containing receptor 1	-0.636	0.00104
A_33_P3381816		INVS	inversin	-0.26	0.00104
A_21_P0010950				-0.362	0.00105
A_23_P73548		GRIPAP1	GRIP1 associated protein 1	-0.155	0.00105
A_21_P0009768				-0.168	0.00106
A_19_P00323692	D	XIST	X inactive specific transcript (non-protein coding)	-0.388	0.00106
A_33_P3415744	D	ANKRD36B	ankyrin repeat domain 36B	-0.379	0.00107
A_33_P3354499				-0.503	0.00108
A_23_P320739		MEF2C	myocyte enhancer factor 2C	0.232	0.00109
A_24_P246518		PKD1L2	polycystic kidney disease 1-like 2 (gene/pseudogene)	-0.42	0.00109
A_33_P3248384		LOC105379655	uncharacterized LOC105379655	-0.394	0.00109
A_33_P3411296		PURA	purine-rich element binding protein A	-0.152	0.00113
A_21_P0001418				0.282	0.00114
A_21_P0006323				0.249	0.00114
A_33_P3225983				-0.398	0.00114
A_33_P3314436		FBXL17	F-box and leucine-rich repeat protein 17	-0.207	0.00116
A_33_P3284919		SEMA6C	semaphorin 6C	-0.369	0.00116
A_33_P3307886		TBXA2R	thromboxane A2 receptor	0.377	0.00117
A_23_P70359		AGPAT4-IT1	AGPAT4 intronic transcript 1	-0.339	0.00118
A_24_P138022		FAM120A	family with sequence similarity 120A	-0.139	0.00118
A_33_P3327818				0.484	0.00119
A_23_P39251		PLIN5	perilipin 5	-0.408	0.0012
A_21_P0001152				-0.47	0.00122
A_21_P0011175		CASC4	cancer susceptibility candidate 4	0.164	0.00123
A_33_P3397801		LOC642484	uncharacterized LOC642484	-0.428	0.00124
A_33_P3374952		KLF17	Kruppel-like factor 17	-0.562	0.00125
A_23_P156809		METTL21A	methyltransferase like 21A	-0.466	0.00125
A_33_P3323760		LOC153684	uncharacterized LOC153684	-0.294	0.00125
A_21_P0011466				-0.302	0.00126
A_33_P3303309		LINC01105	long intergenic non-protein coding RNA 1105	0.286	0.00126
A_21_P0001704				-0.499	0.00127
A_32_P514599		HSPD1P6	heat shock protein family D (Hsp60) member 1 pseudogene 6	-0.211	0.00128
A_32_P223189		SUMO1P3	SUMO1 pseudogene 3 (functional)	0.191	0.00129
A_33_P3254510				-0.228	0.0013
A_21_P0000220		SNORD33	small nucleolar RNA, C/D box 33	0.162	0.0013
A_33_P3893191		DBIL5P2	diazepam binding inhibitor-like 5 pseudogene 2	-0.548	0.00133
A_33_P3375809		LOC729970	hCG2028352-like	0.241	0.00133
A_33_P3244728		LRP2	LDL receptor related protein 2	-0.391	0.00133
A_33_P3298413		PPIH	peptidylprolyl isomerase H	0.201	0.00134
A_33_P3330503		ALDH7A1	aldehyde dehydrogenase 7 family member A1	0.209	0.00135
A_23_P209944		RETSAT	retinol saturase (all-trans-retinol 13,14-reductase)	-0.203	0.00135
A_33_P3219697		ANKRD45	ankyrin repeat domain 45	-0.497	0.00136
A_33_P3225567		TRMT2B	tRNA methyltransferase 2 homolog B	-0.214	0.00136
A_33_P3294801				-0.502	0.00137
A_19_P00810474		CIC	capicua transcriptional repressor	-0.43	0.00137
A_21_P0013340		CCZ1/CCZ1B	CCZ1 homolog, vacuolar protein trafficking and biogenesis associated	-0.505	0.00137
A_21_P0000386		SNORD89	small nucleolar RNA, C/D box 89	0.23	0.00137
A_33_P3405022		LETM1	leucine zipper-EF-hand containing transmembrane protein 1	0.408	0.00138
A_23_P144677		LNPEP	leucyl/cystinyl aminopeptidase	-0.164	0.00138
A_23_P15108		YPEL3	yippee like 3	0.144	0.00141
A_23_P154938		HIRA	histone cell cycle regulator	-0.235	0.00142
A_23_P99762		RBM25	RNA binding motif protein 25	-0.178	0.00142
A_33_P3544887		TTC28	tetratricopeptide repeat domain 28	0.419	0.00142
A_21_P0000258		SNORD26	small nucleolar RNA, C/D box 26	0.208	0.00143
A_21_P0010791		LINC01354	long intergenic non-protein coding RNA 1354	0.212	0.00143
A_33_P3360753		KCNQ2	potassium channel, voltage gated KQT-like subfamily Q, member 2	-0.438	0.00144
A_21_P0013433				-0.177	0.00145
A_33_P3393341		LPIN3	lipin 3	-0.288	0.00145
A_21_P0002334				-0.387	0.00146
A_33_P3334292		PPIAL4G (includes others)	peptidylprolyl isomerase A like 4G	-0.425	0.00146
A_21_P0009873		LOC100505771	uncharacterized LOC100505771	-0.185	0.00146
A_33_P3233869				-0.248	0.00148
A_21_P0011808	D	ANKRD36	ankyrin repeat domain 36	-0.323	0.00148
A_33_P3270192		DIS3L2	DIS3 like 3'-5' exoribonuclease 2	-0.295	0.00148
A_23_P153964		INHBB	inhibin beta B	0.196	0.00148
A_21_P0000369		SNORA16A	small nucleolar RNA, H/ACA box 16A	0.25	0.00148
A_33_P3326020		KANK3	KN motif and ankyrin repeat domains 3	0.331	0.00149
A_33_P3353365		SLC17A4	solute carrier family 17, member 4	0.3	0.00149
A_33_P3276068		TRAPPC3L	trafficking protein particle complex 3-like	-0.473	0.00149
A_33_P3330991				-0.208	0.0015
A_23_P129659		ZNF689	zinc finger protein 689	0.211	0.00151
A_21_P0011299				-0.345	0.00152
A_23_P501547		ADCY6	adenylate cyclase 6	-0.174	0.00152
A_24_P111996		HFE	hemochromatosis	0.192	0.00152
A_21_P0014816		LOC101927151	uncharacterized LOC101927151	-0.199	0.00155
A_33_P3461633		LOC284454	uncharacterized LOC284454	0.365	0.00155
A_23_P137173		TMSB15A	thymosin beta 15a	0.249	0.00156
A_19_P00318280		LOC100506860	uncharacterized LOC100506860	-0.355	0.00156
A_21_P0012944		SMA4	glucuronidase, beta pseudogene	-0.391	0.00157
A_33_P3368800	D	NBPF15 (includes others)	neuroblastoma breakpoint family member 15	-0.335	0.00158
A_33_P3292621		SLC27A1	solute carrier family 27 (fatty acid transporter), member 1	0.166	0.0016
A_33_P3297599				-0.606	0.00161
A_33_P3378531		AS3MT	arsenite methyltransferase	-0.174	0.00163
A_21_P0000225		SNORD83B	small nucleolar RNA, C/D box 83B	0.291	0.00163
A_33_P3424861		FAM118A	family with sequence similarity 118 member A	0.471	0.00165
A_23_P376599		RALBP1	ralA binding protein 1	0.127	0.00165
A_32_P186226		IPO7	importin 7	0.26	0.00166
A_21_P0010949		NUTM2B-AS1	NUTM2B antisense RNA 1	-0.535	0.00166
A_23_P408913		TTC30B	tetratricopeptide repeat domain 30B	0.207	0.00167
A_32_P46191		ZNF727	zinc finger protein 727	-0.222	0.00167
A_33_P3329769		BEND6	BEN domain containing 6	0.222	0.00168
A_21_P0014465	D	LOC101928173	uncharacterized LOC101928173	0.194	0.00168
A_33_P3248863		KRBA2	KRAB-A domain containing 2	-0.518	0.00169
A_33_P3329916		RPL6	ribosomal protein L6	-0.141	0.00169
A_33_P3321781	D	SRSF1	serine/arginine-rich splicing factor 1	-0.509	0.00169
A_33_P3220565		UBTD2	ubiquitin domain containing 2	0.15	0.0017
A_33_P3412294		ZSCAN2	zinc finger and SCAN domain containing 2	0.415	0.0017
A_21_P0009617		LINC00908	long intergenic non-protein coding RNA 908	-0.217	0.0017
A_23_P39223	D	ZNF2	zinc finger protein 2	0.31	0.00171
A_33_P3499102		RBM10	RNA binding motif protein 10	0.373	0.00172
A_21_P0011401		LOC100996255	uncharacterized LOC100996255	-0.292	0.00172
A_19_P00319151	D	XIST	X inactive specific transcript (non-protein coding)	-0.379	0.00173
A_33_P3702281				-0.393	0.00175
A_33_P3812038		LOC340335	uncharacterized LOC340335	-0.418	0.00175
A_32_P40377	D	LOC389906	zinc finger protein 839 pseudogene	-0.165	0.00175
A_23_P255714		IFT74	intraflagellar transport 74	0.214	0.00176
A_33_P3311653		PDS5A	PDS5 cohesin associated factor A	-0.378	0.00176
A_33_P3275998		RABEP1	rabaptin, RAB GTPase binding effector protein 1	0.187	0.00176
A_21_P0005951	D	PVT1	Pvt1 oncogene (non-protein coding)	-0.287	0.0018
A_24_P318967		PDXK	pyridoxal (pyridoxine, vitamin B6) kinase	-0.165	0.00182
A_21_P0000925	D	LINC01341	long intergenic non-protein coding RNA 1341	-0.36	0.00182
A_21_P0001902	D	LOC101928173	uncharacterized LOC101928173	0.218	0.00185
A_21_P0000494		SNORA16B	small nucleolar RNA, H/ACA box 16B	0.288	0.00186
A_24_P185186		SAMD14	sterile alpha motif domain containing 14	0.213	0.00188
A_33_P3341686	D	XIST	X inactive specific transcript (non-protein coding)	-0.404	0.00189
A_23_P14649		ANP32A-IT1	ANP32A intronic transcript 1	-0.45	0.0019
A_33_P3353496		GJD4	gap junction protein delta 4	-0.422	0.00191
A_21_P0010469		CHKB-AS1	CHKB antisense RNA 1 (head to head)	-0.197	0.00192
A_23_P46928	D	PFKP	phosphofructokinase, platelet	-0.239	0.00192
A_24_P34545		ING5	inhibitor of growth family member 5	-0.176	0.00198
A_21_P0013784				-0.188	0.00199
A_21_P0010876		BMS1P6	BMS1, ribosome biogenesis factor pseudogene 6	-0.285	0.00204
A_32_P120791				0.216	0.00206
A_19_P00322813		CCDC171	coiled-coil domain containing 171	0.276	0.00206
A_33_P3276638	D	HMBOX1	homeobox containing 1	-0.157	0.00206
A_33_P3244361				0.424	0.00207
A_24_P142228		RPL13	ribosomal protein L13	-0.161	0.00207
A_23_P326204		SGMS2	sphingomyelin synthase 2	0.23	0.00207
A_23_P202408		HERC4	HECT and RLD domain containing E3 ubiquitin protein ligase 4	-0.188	0.00208
A_19_P00812044	D	MAVS	mitochondrial antiviral signaling protein	-0.194	0.00209
A_33_P3263512				0.418	0.0021
A_24_P271363		CDS2	CDP-diacylglycerol synthase 2	0.156	0.0021
A_33_P3424467		CNST	consortin, connexin sorting protein	0.245	0.0021
A_24_P236235		FLRT2	fibronectin leucine rich transmembrane protein 2	0.199	0.00211
A_23_P203947		DDX11	DEAD/H-box helicase 11	-0.228	0.00212
A_21_P0010878	D	BMS1P5	BMS1, ribosome biogenesis factor pseudogene 5	-0.472	0.00213
A_33_P3351536		PTK2B	protein tyrosine kinase 2 beta	0.168	0.00213
A_23_P69521		CCNI	cyclin I	-0.127	0.00214
A_32_P52119	D	LOC101928673	uncharacterized LOC101928673	-0.194	0.00214
A_23_P154962		RIMBP3 (includes others)	RIMS binding protein 3	0.193	0.00215
A_33_P3229390				0.419	0.00218
A_33_P3253653		GPR155	G protein-coupled receptor 155	-0.175	0.00218
A_33_P3361746		TRPS1	trichorhinophalangeal syndrome I	0.182	0.00218
A_33_P3256902				-0.16	0.00219
A_33_P3294961		LAT2	linker for activation of T-cells family member 2	-0.514	0.0022
A_33_P3322430				-0.477	0.00221
A_23_P125423		C1R	complement component 1, r subcomponent	0.153	0.00222
A_33_P3380612	D	HSPG2	heparan sulfate proteoglycan 2	-0.196	0.00223
A_23_P212511		TTC14	tetratricopeptide repeat domain 14	-0.205	0.00224
A_33_P3264612		TPCN2	two pore segment channel 2	-0.177	0.00226
A_23_P153037		ZNF624	zinc finger protein 624	0.222	0.00227
A_21_P0008807				-0.138	0.00229
A_19_P00331623	D	XIST	X inactive specific transcript (non-protein coding)	-0.379	0.00229
A_33_P3324004		CCL15	chemokine (C-C motif) ligand 15	0.305	0.00231
A_32_P71113		SCAI	suppressor of cancer cell invasion	-0.177	0.00231
A_24_P87763		EEF2	eukaryotic translation elongation factor 2	-0.181	0.00233
A_23_P378690		TMEM64	transmembrane protein 64	0.192	0.00233
A_21_P0011934	D	LINC00342	long intergenic non-protein coding RNA 342	-0.352	0.00235
A_33_P3331791				-0.473	0.00236
A_33_P3211203		LOC101927919	uncharacterized LOC101927919	-0.267	0.00238
A_23_P150931		LMBR1L	limb development membrane protein 1-like	-0.187	0.00239
A_33_P3414903		NPL	N-acetylneuraminate pyruvate lyase (dihydrodipicolinate synthase)	-0.462	0.00239
A_23_P130642		GBP6	guanylate binding protein family member 6	0.374	0.00243
A_23_P126266		HLX	H2.0-like homeobox	0.2	0.00243
A_23_P88099		MCF2L	MCF.2 cell line derived transforming sequence like	0.252	0.00249
A_33_P3296198		C5orf63	chromosome 5 open reading frame 63	-0.175	0.0025
A_23_P252913		BBS7	Bardet-Biedl syndrome 7	0.204	0.00254
A_21_P0011376				-0.115	0.00255
A_33_P3322082				-0.55	0.00256
A_23_P88559		LIPC	lipase, hepatic	0.27	0.00258
A_33_P3265956		CBFA2T2	core-binding factor, runt domain, alpha subunit 2; translocated to, 2	-0.397	0.00259
A_23_P128613		KDELC1	KDEL motif containing 1	0.137	0.0026
A_21_P0012899		LOC102725134	uncharacterized LOC102725134	-0.341	0.00262
A_33_P3305458		ATF6B	activating transcription factor 6 beta	0.339	0.00263
A_21_P0011370	D	GOLGA8A/GOLGA8B	golgin A8 family member A	-0.392	0.00263
A_33_P3266010		RIN1	Ras and Rab interactor 1	-0.144	0.00263
A_21_P0007429	D	NCR3LG1	natural killer cell cytotoxicity receptor 3 ligand 1	-0.206	0.00264
A_23_P1552		CTSC	cathepsin C	0.194	0.00266
A_33_P3216955		ANAPC16	anaphase promoting complex subunit 16	0.18	0.00267
A_23_P369666		ZMYND8	zinc finger, MYND-type containing 8	-0.358	0.00268
A_33_P3249002				0.149	0.00269
A_23_P4416		ZNF287	zinc finger protein 287	0.202	0.00271
A_33_P3884179	D	LINC00342	long intergenic non-protein coding RNA 342	-0.389	0.00272
A_23_P254081		LIAS	lipoic acid synthetase	-0.136	0.00273
A_33_P3375613		C8orf44-SGK3/SGK3	serum/glucocorticoid regulated kinase family member 3	-0.367	0.00274
A_21_P0007530				-0.211	0.00275
A_33_P3287388				-0.434	0.00278
A_33_P3315899				-0.47	0.00278
A_33_P3232294		ITPR2	inositol 1,4,5-trisphosphate receptor, type 2	-0.308	0.00278
A_23_P148273		MAGT1	magnesium transporter 1	0.175	0.00278
A_23_P22119		PLEC	plectin	-0.212	0.00278
A_23_P115105		SZRD1	SUZ RNA binding domain containing 1	0.196	0.00279
A_24_P66679		NAA30	N(alpha)-acetyltransferase 30, NatC catalytic subunit	0.213	0.0028
A_33_P3412560				0.388	0.00281
A_33_P3337896	D	LOC100996724	phosphodiesterase 4D interacting protein-like	-0.492	0.00281
A_21_P0011004		LOC729732	uncharacterized LOC729732	0.177	0.00283
A_33_P3275959		SLC25A16	solute carrier family 25 (mitochondrial carrier), member 16	-0.434	0.00285
A_21_P0012245		CECR7	cat eye syndrome chromosome region, candidate 7 (non-protein coding)	-0.342	0.00286
A_21_P0006538	D	XIST	X inactive specific transcript (non-protein coding)	-0.348	0.00286
A_33_P3421611				-0.201	0.00287
A_33_P3479999		PHBP19	prohibitin pseudogene 19	-0.31	0.00287
A_19_P00322977	D	LINC-PINT	long intergenic non-protein coding RNA, p53 induced transcript	-0.282	0.00287
A_24_P942250		CHD9	chromodomain helicase DNA binding protein 9	-0.184	0.0029
A_24_P332739	D	GUSBP1	glucuronidase, beta pseudogene 1	-0.222	0.0029
A_33_P3370461	D	SUZ12P1	SUZ12 polycomb repressive complex 2 subunit pseudogene 1	-0.313	0.0029
A_23_P422071		B3GALT4	Beta-1,3-galactosyltransferase 4	0.191	0.00291
A_33_P3355743		GPATCH2	G-patch domain containing 2	-0.235	0.00291
A_24_P358084	D	NPIPB3 (includes others)	nuclear pore complex interacting protein family, member B3	-0.282	0.00292
A_33_P3338733		MITF	microphthalmia-associated transcription factor	0.161	0.00297
A_23_P8664		DMTF1	cyclin D binding myb-like transcription factor 1	-0.289	0.00298
A_32_P184796		RPLP0	ribosomal protein, large, P0	-0.178	0.00298
A_24_P933011		TMEM200C	transmembrane protein 200C	0.19	0.00298
A_33_P3230219		TMEM54	transmembrane protein 54	0.166	0.00298
A_33_P3221177		ZDHHC20	zinc finger, DHHC-type containing 20	0.307	0.00298
A_24_P299685		PDPN	podoplanin	0.278	0.00301
A_24_P125881		DGCR2	DiGeorge syndrome critical region gene 2	0.15	0.00303
A_21_P0000697		LOC100505912	uncharacterized LOC100505912	-0.268	0.00303
A_23_P350754		OR7E14P	olfactory receptor family 7 subfamily E member 14 pseudogene	0.149	0.00304
A_23_P381261		ADCY4	adenylate cyclase 4	-0.269	0.00306
A_21_P0011931		KMT2C	lysine (K)-specific methyltransferase 2C	-0.205	0.00306
A_21_P0003164				-0.319	0.00307
A_33_P3338961				-0.517	0.00307
A_33_P3254666		LZTS2	leucine zipper, putative tumor suppressor 2	0.267	0.00307
A_23_P12884		GRK5	G protein-coupled receptor kinase 5	0.196	0.00308
A_33_P3369567		LSP1	lymphocyte-specific protein 1	-0.223	0.00309
A_23_P164999		CDC34	cell division cycle 34	-0.11	0.0031
A_23_P157726		DENND4C	DENN/MADD domain containing 4C	-0.141	0.00312
A_19_P00321132		LOC101927136	uncharacterized LOC101927136	0.257	0.00312
A_33_P3324137				-0.383	0.00313
A_21_P0000039		DDHD2	DDHD domain containing 2	-0.34	0.00318
A_23_P393620		TFPI2	tissue factor pathway inhibitor 2	-0.252	0.00319
A_32_P41375		LINC01000	long intergenic non-protein coding RNA 1000	-0.556	0.00321
A_23_P58983		TBC1D22B	TBC1 domain family member 22B	0.157	0.00322
A_21_P0001360				0.229	0.00323
A_33_P3353343		SRRM2	serine/arginine repetitive matrix 2	-0.186	0.00323
A_33_P3262191		CPNE7	copine VII	-0.305	0.00324
A_23_P128956		ZFYVE1	zinc finger, FYVE domain containing 1	0.11	0.00324
A_32_P116323	D	SMG1	SMG1 phosphatidylinositol 3-kinase-related kinase	-0.262	0.00325
A_33_P3383696		SPEG	SPEG complex locus	-0.253	0.00325
A_33_P3262470		SERP2	stress-associated endoplasmic reticulum protein family member 2	0.159	0.00325
A_32_P170749		STAG3	stromal antigen 3	-0.395	0.00325
A_33_P3609431				-0.439	0.00326
A_24_P31929		PRRG1	proline rich Gla (G-carboxyglutamic acid) 1	0.128	0.00326
A_24_P135902	D	RPS2	ribosomal protein S2	-0.146	0.00326
A_33_P3215788	D	ANKRD36	ankyrin repeat domain 36	-0.21	0.00333
A_33_P3352432		KRBOX4	KRAB box domain containing 4	-0.167	0.00333
A_23_P214666		RPS18	ribosomal protein S18	-0.174	0.00335
A_24_P306594		C1orf167	chromosome 1 open reading frame 167	0.228	0.00338
A_24_P926760	D	NKTR	natural killer cell triggering receptor	-0.187	0.00338
A_23_P36724		FBXL14	F-box and leucine-rich repeat protein 14	0.147	0.00339
A_24_P268196		LZIC	leucine zipper and CTNNBIP1 domain containing	0.235	0.00339
A_21_P0001616				0.243	0.0034
A_33_P3420747		YTHDC2	YTH domain containing 2	-0.168	0.00344
A_23_P78664		DDX39A	DEAD-box helicase 39A	-0.119	0.00345
A_33_P3399028		TLK2	tousled like kinase 2	-0.221	0.00345
A_23_P65068		EID3	EP300 interacting inhibitor of differentiation 3	-0.197	0.00346
A_23_P203920		SSPN	sarcospan	0.156	0.00346
A_33_P3385765		ZNF763	zinc finger protein 763	-0.445	0.00347
A_33_P3337044		SLC2A6	solute carrier family 2 (facilitated glucose transporter), member 6	-0.415	0.00354
A_23_P129188		CALML4	calmodulin like 4	-0.26	0.00357
A_33_P3321432		FAM198B	family with sequence similarity 198 member B	0.207	0.00357
A_33_P3222744		ZNF117	zinc finger protein 117	-0.292	0.00357
A_21_P0000924	D	LINC01341	long intergenic non-protein coding RNA 1341	-0.377	0.00358
A_33_P3648597		LOC283075	uncharacterized LOC283075	0.139	0.00361
A_23_P19987		IGF2BP3	insulin like growth factor 2 mRNA binding protein 3	-0.13	0.00366
A_33_P3760125		FAM224A	family with sequence similarity 224 member A (non-protein coding)	-0.526	0.00369
A_21_P0006187		LOC158435	uncharacterized LOC158435	0.208	0.0037
A_33_P3319134				-0.388	0.00371
A_21_P0010794		FAM157C	family with sequence similarity 157 member C	-0.25	0.00377
A_23_P162702	D	HECTD4	HECT domain containing E3 ubiquitin protein ligase 4	-0.159	0.00377
A_33_P3351664		CCDC57	coiled-coil domain containing 57	-0.184	0.00379
A_33_P3315929		PTBP3	polypyrimidine tract binding protein 3	0.184	0.00381
A_21_P0000358		SNORA71C	small nucleolar RNA, H/ACA box 71C	0.191	0.00383
A_33_P3394234		ZNF133	zinc finger protein 133	-0.184	0.00389
A_21_P0012208				-0.271	0.00392
A_23_P40782		COMMD2	COMM domain containing 2	0.197	0.00392
A_23_P99063		LUM	lumican	0.176	0.00393
A_33_P3378284		COX6B2	cytochrome c oxidase subunit VIb polypeptide 2 (testis)	0.392	0.00397
A_24_P926195		MAN1A2	mannosidase, alpha, class 1A, member 2	0.125	0.00398
A_23_P87603		TARBP2	TAR (HIV-1) RNA binding protein 2	-0.121	0.00398
A_23_P417383		ASPRV1	aspartic peptidase, retroviral-like 1	0.184	0.00399
A_23_P362893		TEAD1	TEA domain transcription factor 1	-0.098	0.00404
A_33_P3398437		MGA	MGA, MAX dimerization protein	0.362	0.00405
A_33_P3258782	D	AP1S2	adaptor related protein complex 1 sigma 2 subunit	0.2	0.00407
A_23_P114883		FMOD	fibromodulin	0.099	0.00408
A_33_P3409675		LOC442132	golgin A6 family-like 1 pseudogene	-0.493	0.00409
A_33_P3294986		LIPE	lipase, hormone-sensitive	-0.233	0.00411
A_33_P3373144		SZT2	seizure threshold 2 homolog (mouse)	-0.415	0.00413
A_21_P0007936				-0.363	0.00416
A_23_P212608		CLSTN2	calsyntenin 2	0.279	0.00417
A_33_P3390570		KMT2A	lysine (K)-specific methyltransferase 2A	-0.155	0.00417
A_33_P3392677				-0.219	0.00418
A_24_P36745		CXorf38	chromosome X open reading frame 38	-0.145	0.00418
A_33_P3555009		ZNF528-AS1	ZNF528 antisense RNA 1	-0.132	0.00418
A_33_P3247095				0.293	0.00419
A_33_P3385561				-0.379	0.00419
A_23_P254353		NOXA1	NADPH oxidase activator 1	-0.254	0.0042
A_33_P3310047		SHROOM4	shroom family member 4	-0.48	0.0042
A_33_P3307894				-0.338	0.00421
A_33_P3389578				-0.397	0.00422
A_32_P142440		PCSK9	proprotein convertase subtilisin/kexin type 9	0.249	0.00423
A_24_P297551		FAM19A2	family with sequence similarity 19 (chemokine (C-C motif)-like), member A2	0.193	0.00424
A_32_P189790		DKFZp779M0652	uncharacterized DKFZp779M0652	0.137	0.00424
A_23_P259135		NCOA6	nuclear receptor coactivator 6	-0.117	0.00426
A_21_P0011359				-0.278	0.00429
A_21_P0013193	D	LINC00174	long intergenic non-protein coding RNA 174	-0.374	0.00431
A_33_P3240518		AURKAIP1	aurora kinase A interacting protein 1	-0.128	0.00432
A_21_P0013250		PMS2P10	PMS1 homolog 2, mismatch repair system component pseudogene 10	-0.305	0.00434
A_21_P0000244		SNORD16	small nucleolar RNA, C/D box 16	0.461	0.00434
A_33_P3326904				-0.317	0.00435
A_24_P40594		HOMEZ	homeobox and leucine zipper encoding	0.174	0.00435
A_23_P212002	D	NKTR	natural killer cell triggering receptor	-0.219	0.00437
A_33_P3404189		MROH1	maestro heat-like repeat family member 1	-0.319	0.00441
A_23_P83634		ALOX12B	arachidonate 12-lipoxygenase, 12R type	0.177	0.00445
A_23_P422178		CUL4B	cullin 4B	-0.137	0.00446
A_23_P251505	D	NSUN5	NOP2/Sun RNA methyltransferase family member 5	-0.227	0.00446
A_33_P3349591		LOC100129461	LYRM4 antisense RNA 1	0.18	0.00448
A_33_P3281741		RFX8	RFX family member 8, lacking RFX DNA binding domain	-0.24	0.00453
A_33_P3268798		ADAT2	adenosine deaminase, tRNA-specific 2	-0.194	0.00454
A_33_P3347387				0.153	0.00456
A_33_P3295550		TET1	tet methylcytosine dioxygenase 1	-0.221	0.00457
A_33_P3214879		KPNA1	karyopherin alpha 1	0.165	0.00458
A_24_P195794				-0.137	0.00459
A_23_P333683		IGSF10	immunoglobulin superfamily member 10	0.215	0.0046
A_19_P00316284		MIR143HG	cardiac mesoderm enhancer-associated non-coding RNA	-0.439	0.00463
A_24_P56281		CAPRIN2	caprin family member 2	-0.196	0.00465
A_32_P2103				-0.148	0.00467
A_33_P3340424				-0.107	0.00468
A_23_P14389		ACIN1	apoptotic chromatin condensation inducer 1	-0.181	0.0047
A_23_P121602		SAP30	Sin3A associated protein 30kDa	0.155	0.0047
A_33_P3215906	D	NBPF15 (includes others)	neuroblastoma breakpoint family member 15	-0.32	0.00473
A_23_P305692		ELMOD2	ELMO/CED-12 domain containing 2	0.129	0.00475
A_33_P3239222		EIF3B	eukaryotic translation initiation factor 3 subunit B	-0.087	0.00478
A_23_P110212		ACSL1	acyl-CoA synthetase long-chain family member 1	-0.172	0.00482
A_23_P19084		HNRNPAB	heterogeneous nuclear ribonucleoprotein A/B	-0.189	0.00483
A_21_P0000153		NR3C1	nuclear receptor subfamily 3 group C member 1	-0.34	0.00487
A_23_P125717		NAP1L3	nucleosome assembly protein 1-like 3	0.208	0.00488
A_33_P3288774	D	RC3H1	ring finger and CCCH-type domains 1	-0.152	0.00489
A_33_P3808996		SPATS2	spermatogenesis associated, serine rich 2	-0.148	0.00489
A_33_P3365193	D	AMY1C (includes others)	amylase, alpha 1A (salivary)	-0.384	0.00491
A_23_P309292	D	HECTD4	HECT domain containing E3 ubiquitin protein ligase 4	-0.194	0.00492
A_32_P76853	D	GOLGA8J (includes others)	golgin A8 family member R	-0.308	0.00493
A_33_P3333033		SGSM2	small G protein signaling modulator 2	-0.611	0.00498
A_33_P3344831		TMEM45A	transmembrane protein 45A	0.128	0.005
A_33_P3303372		PARD3	par-3 family cell polarity regulator	-0.134	0.00501
A_21_P0000478		SNORA11C	small nucleolar RNA, H/ACA box 11C	0.204	0.00504
A_33_P3311646				0.38	0.00508
A_33_P3211834		SIRPB1	signal-regulatory protein beta 1	-0.664	0.0051
A_23_P214360		IRF4	interferon regulatory factor 4	0.174	0.00511
A_23_P427502		ZNRF3	zinc and ring finger 3	0.218	0.00511
A_21_P0005835		LINC00968	long intergenic non-protein coding RNA 968	0.26	0.00511
A_21_P0005813				0.302	0.00514
A_33_P3404651		TTC7A	tetratricopeptide repeat domain 7A	-0.183	0.00515
A_23_P35148		TAF13	TATA-box binding protein associated factor 13	0.179	0.00516
A_21_P0013991				-0.317	0.00517
A_23_P217015		SET	SET nuclear proto-oncogene	-0.175	0.00519
A_24_P65507		STRA13	stimulated by retinoic acid 13	-0.118	0.0052
A_23_P145089		HSP90AB1	heat shock protein 90kDa alpha family class B member 1	-0.105	0.00521
A_23_P77103		SORD	sorbitol dehydrogenase	-0.184	0.00522
A_23_P316472		DNHD1	dynein heavy chain domain 1	-0.293	0.00524
A_21_P0013893				-0.31	0.00525
A_21_P0010394		MED15	mediator complex subunit 15	-0.424	0.00528
A_33_P3349827		RBM3	RNA binding motif (RNP1, RRM) protein 3	-0.158	0.00528
A_33_P3272508		MRPL57	mitochondrial ribosomal protein L57	-0.165	0.00533
A_33_P3220152		SBNO2	strawberry notch homolog 2 (Drosophila)	-0.332	0.00539
A_23_P16683		TRMT1	tRNA methyltransferase 1	-0.135	0.00541
A_23_P6561		EBLN2	endogenous Bornavirus-like nucleoprotein 2	-0.254	0.00542
A_23_P30799		HIST1H3F	histone cluster 1, H3f	0.128	0.00542
A_33_P3351559		ETNK1	ethanolamine kinase 1	-0.118	0.00545
A_33_P3410201				0.245	0.00546
A_23_P8119		ZBTB9	zinc finger and BTB domain containing 9	0.164	0.00551
A_33_P3231695		ZNF667	zinc finger protein 667	-0.198	0.00552
A_21_P0013251		PMS2	PMS1 homolog 2, mismatch repair system component	-0.209	0.00553
A_24_P24142				-0.191	0.00557
A_23_P325438		XPO6	exportin 6	-0.115	0.00558
A_33_P3369245				0.229	0.00561
A_21_P0005833		LOC101929398	uncharacterized LOC101929398	0.19	0.00565
A_21_P0004864		LOC102724851	uncharacterized LOC102724851	-0.25	0.00567
A_23_P135454		AFG3L2	AFG3-like AAA ATPase 2	-0.114	0.00569
A_21_P0013269		LOC101928451	uncharacterized LOC101928451	-0.221	0.0057
A_23_P3849		TRAP1	TNF receptor-associated protein 1	-0.142	0.00572
A_23_P92928		C6	complement component 6	-0.209	0.00574
A_21_P0008517		LOC100506476	uncharacterized LOC100506476	0.209	0.00575
A_21_P0005658				-0.362	0.00576
A_33_P3287785		NEFL	neurofilament, light polypeptide	0.215	0.00576
A_23_P11664	D	SRSF11	serine/arginine-rich splicing factor 11	-0.189	0.00578
A_21_P0000260		SNORD58A	small nucleolar RNA, C/D box 58A	0.211	0.00579
A_32_P225355		CPEB2	cytoplasmic polyadenylation element binding protein 2	-0.151	0.00581
A_19_P00321977				-0.21	0.00584
A_23_P429020		HKR1	HKR1, GLI-Kruppel zinc finger family member	-0.232	0.00584
A_33_P3337415		GNAL	guanine nucleotide binding protein (G protein), alpha activating activity polypeptide, olfactory type	-0.309	0.00585
A_33_P3391596		LAMA4	laminin subunit alpha 4	0.279	0.00588
A_33_P3367396		FAM177B	family with sequence similarity 177 member B	-0.764	0.0059
A_23_P301360		ZNF572	zinc finger protein 572	0.183	0.0059
A_33_P3373775		BCL2L15	BCL2 like 15	0.26	0.00591
A_23_P142631		FKBP1B	FK506 binding protein 1B	0.153	0.00591
A_33_P3341540				0.291	0.00592
A_24_P329795		C10orf10	chromosome 10 open reading frame 10	0.233	0.00595
A_32_P96807	D	RC3H1	ring finger and CCCH-type domains 1	-0.161	0.00595
A_24_P331373		GUCD1	guanylyl cyclase domain containing 1	0.258	0.00596
A_23_P15511		DDX5	DEAD-box helicase 5	-0.159	0.00597
A_21_P0005919				-0.523	0.00599
A_21_P0013805	D	LOC389906	zinc finger protein 839 pseudogene	-0.178	0.00603
A_33_P3352980				-0.39	0.0061
A_24_P84822	D	GUSBP1	glucuronidase, beta pseudogene 1	-0.33	0.00611
A_21_P0013071				0.202	0.00612
A_33_P3228355		ERV3-1	endogenous retrovirus group 3 member 1	-0.19	0.00613
A_33_P3408962	D	SCN8A	sodium channel, voltage gated, type VIII alpha subunit	-0.192	0.00613
A_33_P3245168		FAM71F2	family with sequence similarity 71 member F2	-0.24	0.00616
A_19_P00804072	D	RNF213	ring finger protein 213	-0.258	0.00618
A_21_P0008662				-0.404	0.00622
A_21_P0008570				-0.364	0.00623
A_21_P0010470				-0.247	0.00625
A_33_P3381429				-0.182	0.00626
A_21_P0011358				-0.321	0.0063
A_33_P3269824		LRRC66	leucine rich repeat containing 66	-0.186	0.0063
A_33_P3224483		RABL2B	RAB, member of RAS oncogene family-like 2B	-0.364	0.0063
A_23_P51918		SEC16B	SEC16 homolog B, endoplasmic reticulum export factor	-0.17	0.0063
A_21_P0014626		RNF13	ring finger protein 13	0.133	0.00632
A_23_P126803		ARPC5	actin related protein 2/3 complex subunit 5	-0.144	0.0064
A_33_P3215739		LNP1	leukemia NUP98 fusion partner 1	0.159	0.0064
A_33_P3303602		DGKZ	diacylglycerol kinase zeta	-0.273	0.00642
A_23_P397455		ACVR1C	activin A receptor type IC	-0.294	0.00643
A_24_P392690				-0.107	0.00644
A_33_P3247077				0.317	0.00646
A_23_P114808		MECR	mitochondrial trans-2-enoyl-CoA reductase	-0.104	0.00647
A_23_P61406		SHC3	SHC (Src homology 2 domain containing) transforming protein 3	0.241	0.00647
A_23_P64232		ZPR1	ZPR1 zinc finger	-0.101	0.00648
A_24_P111054		SLC2A5	solute carrier family 2 (facilitated glucose/fructose transporter), member 5	0.247	0.00649
A_21_P0001374	D	NBPF15 (includes others)	neuroblastoma breakpoint family member 15	-0.365	0.00652
A_33_P3372526		MDH1B	malate dehydrogenase 1B	-0.316	0.00654
A_33_P3423949		CBX2	chromobox 2	0.235	0.00655
A_33_P3288839		C14orf37	chromosome 14 open reading frame 37	0.192	0.00655
A_33_P3272352		LOC105374463	uncharacterized LOC105374463	0.391	0.00655
A_33_P3262537				-0.346	0.00658
A_21_P0001545				0.13	0.0066
A_32_P223017		MAP3K6	mitogen-activated protein kinase kinase kinase 6	-0.099	0.00665
A_33_P3802558				-0.278	0.00667
A_33_P3374258		NHLH2	nescient helix-loop-helix 2	0.217	0.00671
A_33_P3240532		RGL1	ral guanine nucleotide dissociation stimulator-like 1	0.125	0.00671
A_23_P75310		ARHGAP22	Rho GTPase activating protein 22	-0.177	0.00674
A_23_P314726		PI4KB	phosphatidylinositol 4-kinase, catalytic, beta	-0.107	0.00679
A_23_P210939		EIF6	eukaryotic translation initiation factor 6	-0.134	0.00684
A_23_P376627		D2HGDH	D-2-hydroxyglutarate dehydrogenase	-0.279	0.00687
A_33_P3290955		WDR97	WD repeat domain 97	0.404	0.00689
A_23_P201002		RNF220	ring finger protein 220	0.105	0.0069
A_33_P3245620				0.348	0.00694
A_24_P85619				0.18	0.00695
A_23_P65609		GTF2A1	general transcription factor IIA 1	0.168	0.00696
A_21_P0014844		FGD5-AS1	FGD5 antisense RNA 1	0.369	0.00697
A_23_P376096		TICAM1	toll-like receptor adaptor molecule 1	0.162	0.00697
A_21_P0000238		SNORD12C	small nucleolar RNA, C/D box 12C	0.183	0.00701
A_23_P207666		USP32	ubiquitin specific peptidase 32	-0.132	0.00702
A_33_P3414157		MLPH	melanophilin	-0.198	0.00703
A_33_P3345643		ZDHHC11	zinc finger, DHHC-type containing 11	-0.316	0.00703
A_23_P359647		NFAT5	nuclear factor of activated T-cells 5, tonicity-responsive	-0.248	0.00706
A_23_P207387		GHDC	GH3 domain containing	0.139	0.00708
A_33_P3335124	D	RPS2	ribosomal protein S2	-0.141	0.00708
A_21_P0003214				-0.381	0.00709
A_33_P3317406		NDUFV1	NADH:ubiquinone oxidoreductase core subunit V1	-0.144	0.00712
A_33_P3252206		LEPROTL1	leptin receptor overlapping transcript-like 1	-0.227	0.00715
A_32_P182941		RPS3	ribosomal protein S3	-0.145	0.00719
A_23_P371885		ARL17A/ARL17B	ADP ribosylation factor like GTPase 17A	-0.296	0.00721
A_21_P0013911				0.172	0.00723
A_23_P74114		ZNF713	zinc finger protein 713	0.305	0.00724
A_21_P0000286		SNORD48	small nucleolar RNA, C/D box 48	0.151	0.00724
A_24_P588897		SLCO3A1	solute carrier organic anion transporter family member 3A1	0.154	0.00726
A_24_P915806		HNMT	histamine N-methyltransferase	0.208	0.00728
A_33_P3281807		PDDC1	Parkinson disease 7 domain containing 1	-0.183	0.00729
A_19_P00317052	D	RNF213	ring finger protein 213	-0.183	0.0074
A_21_P0000400		SNORD114-3	small nucleolar RNA, C/D box 114-3	-0.184	0.00743
A_33_P3259801		TMEM189	transmembrane protein 189	0.168	0.00747
A_21_P0007437		LOC101927495	uncharacterized LOC101927495	-0.281	0.0075
A_24_P352116		SNHG7	small nucleolar RNA host gene 7	-0.345	0.0075
A_23_P425880	D	TRIO	trio Rho guanine nucleotide exchange factor	-0.173	0.00751
A_21_P0013885		LOC102723951	uncharacterized LOC102723951	-0.191	0.00753
A_33_P3373765		DRD4	dopamine receptor D4	-0.323	0.00754
A_23_P46871		SLC29A3	solute carrier family 29 (equilibrative nucleoside transporter), member 3	0.158	0.00757
A_33_P3298771				-0.235	0.0076
A_21_P0011465	D	SMG1	SMG1 phosphatidylinositol 3-kinase-related kinase	-0.247	0.00761
A_23_P397543	D	LINC00174	long intergenic non-protein coding RNA 174	-0.348	0.00763
A_33_P3378384	D	DNM1P46	dynamin 1 pseudogene 46	-0.242	0.00767
A_24_P276531		SNIP1	Smad nuclear interacting protein 1	0.151	0.00768
A_21_P0013343				-0.398	0.00769
A_33_P3339066		RNPC3	RNA binding region (RNP1, RRM) containing 3	-0.194	0.00773
A_33_P3261648	D	ANKRD36B	ankyrin repeat domain 36B	-0.237	0.00774
A_24_P100761	D	BCAS3	breast carcinoma amplified sequence 3	0.161	0.00774
A_33_P3315856		DHX34	DEAH-box helicase 34	-0.176	0.00774
A_23_P68807				-0.3	0.00775
A_33_P3375185		TCTEX1D4	Tctex1 domain containing 4	0.28	0.00775
A_33_P3369969		ATXN1L	ataxin 1-like	0.116	0.00782
A_19_P00317897	D	LOC101928673	uncharacterized LOC101928673	-0.265	0.00783
A_33_P3302957		PLEKHG4	pleckstrin homology and RhoGEF domain containing G4	-0.207	0.00784
A_23_P14774		CTSH	cathepsin H	0.165	0.00788
A_33_P3252134				0.294	0.00789
A_33_P3304678		LINC00654	long intergenic non-protein coding RNA 654	0.171	0.00791
A_33_P3404052		TNFAIP8	TNF alpha induced protein 8	0.14	0.00792
A_33_P3377691		C4orf46	chromosome 4 open reading frame 46	0.153	0.00794
A_32_P32254		COL6A1	collagen, type VI, alpha 1	-0.187	0.00794
A_24_P110558		IGIP	IgA-inducing protein	-0.172	0.00796
A_24_P11587		PEX13	peroxisomal biogenesis factor 13	0.165	0.00796
A_23_P301247		HIST2H2AC	histone cluster 2, H2ac	0.176	0.00801
A_21_P0000593		SNORA70D	small nucleolar RNA, H/ACA box 70D	-0.227	0.00805
A_23_P359430	D	NBPF15 (includes others)	neuroblastoma breakpoint family member 15	-0.206	0.00809
A_23_P24796		FAM160A2	family with sequence similarity 160 member A2	-0.252	0.00811
A_19_P00810085		LINC00607	long intergenic non-protein coding RNA 607	-0.184	0.00812
A_33_P3357382		POGZ	pogo transposable element with ZNF domain	-0.36	0.00815
A_21_P0014334		LOC101928557	uncharacterized LOC101928557	0.502	0.00817
A_21_P0000240		SNORD100	small nucleolar RNA, C/D box 100	0.138	0.00818
A_33_P3328485		IKZF2	IKAROS family zinc finger 2	-0.228	0.00819
A_21_P0014726		LOC101929188	uncharacterized LOC101929188	0.206	0.00825
A_21_P0001222				-0.279	0.00826
A_33_P3211956		RGS19	regulator of G-protein signaling 19	0.168	0.00828
A_21_P0005586				0.285	0.00831
A_33_P3318377				0.221	0.00831
A_33_P3286157		TNFRSF4	tumor necrosis factor receptor superfamily member 4	0.184	0.00833
A_24_P337419		TIGD6	tigger transposable element derived 6	0.172	0.00834
A_32_P149492	D	NBPF15 (includes others)	neuroblastoma breakpoint family member 15	-0.196	0.00835
A_21_P0009305				0.232	0.00836
A_23_P39616		ORC2	origin recognition complex subunit 2	-0.19	0.00837
A_24_P58122		USP24	ubiquitin specific peptidase 24	-0.109	0.00838
A_19_P00319537		LINC01091	long intergenic non-protein coding RNA 1091	0.23	0.00839
A_21_P0010725	D	LOC645166	lymphocyte-specific protein 1 pseudogene	-0.457	0.00846
A_21_P0014747		LOC101927895	uncharacterized LOC101927895	0.189	0.00846
A_23_P421175		FAM83H	family with sequence similarity 83 member H	0.168	0.00848
A_23_P23611	D	AMY1C (includes others)	amylase, alpha 1A (salivary)	-0.31	0.00851
A_24_P288915		CCDC144B	coiled-coil domain containing 144B (pseudogene)	-0.26	0.00852
A_19_P00320719	D	MDM4	MDM4, p53 regulator	-0.249	0.00852
A_33_P3589217	D	SLC25A6	solute carrier family 25 (mitochondrial carrier; adenine nucleotide translocator), member 6	-0.127	0.00853
A_23_P42331		HMGA1	high mobility group AT-hook 1	-0.211	0.00854
A_33_P3221999		GSDMB	gasdermin B	-0.391	0.00855
A_33_P3384260		HNRNPA1	heterogeneous nuclear ribonucleoprotein A1	-0.236	0.00857
A_21_P0006000				0.406	0.00858
A_33_P3420035		ZNF445	zinc finger protein 445	-0.23	0.00862
A_23_P111343		BCLAF1	BCL2-associated transcription factor 1	-0.135	0.00863
A_23_P253158		EP400	E1A binding protein p400	-0.17	0.00863
A_19_P00813085				-0.187	0.00864
A_23_P345220	D	SH3PXD2A	SH3 and PX domains 2A	-0.193	0.00864
A_23_P98686		ATHL1	ATH1, acid trehalase-like 1 (yeast)	-0.267	0.00867
A_33_P3309429		NUPL2	nucleoporin like 2	0.286	0.00868
A_33_P3235987		PIN4	peptidylprolyl cis/trans isomerase, NIMA-interacting 4	0.125	0.0087
A_21_P0003858				0.199	0.00871
A_21_P0011384		UBE2Q2P1	ubiquitin conjugating enzyme E2Q family member 2 pseudogene 1	-0.27	0.00873
A_21_P0014553		DUXAP10	double homeobox A pseudogene 10	-0.21	0.00874
A_23_P124837		LRP1	LDL receptor related protein 1	-0.224	0.00874
A_23_P59613		FZD9	frizzled class receptor 9	-0.494	0.00876
A_21_P0011461				-0.233	0.00878
A_33_P3309319		PIDD1	p53-induced death domain protein 1	-0.227	0.00878
A_33_P3345031				0.17	0.00879
A_23_P26358	D	SMG1	SMG1 phosphatidylinositol 3-kinase-related kinase	-0.328	0.00881
A_33_P3222367		SNORA74B	small nucleolar RNA, H/ACA box 74B	-0.197	0.00886
A_24_P116669		CANT1	calcium activated nucleotidase 1	0.173	0.00887
A_32_P90047		C4orf48	chromosome 4 open reading frame 48	-0.086	0.00888
A_23_P403424		JMJD7-PLA2G4B	JMJD7-PLA2G4B readthrough	-0.252	0.00888
A_23_P91350		GPCPD1	glycerophosphocholine phosphodiesterase 1	-0.201	0.00889
A_19_P00322416		LINC00888	long intergenic non-protein coding RNA 888	-0.239	0.0089
A_24_P410516	D	GOLGA6L9 (includes others)	golgin A6 family-like 9	-0.336	0.00892
A_33_P3311770		ZNF789	zinc finger protein 789	-0.257	0.00892
A_23_P358195	D	GOLGA6L9 (includes others)	golgin A6 family-like 9	-0.361	0.00894
A_23_P116898		A2M	alpha-2-macroglobulin	-0.215	0.00897
A_23_P169494		ORM1	orosomucoid 1	-0.286	0.009
A_24_P743869		BBIP1	BBSome interacting protein 1	0.154	0.00901
A_33_P3225873		LINC01002	long intergenic non-protein coding RNA 1002	-0.22	0.00901
A_24_P481783		UBAP1L	ubiquitin associated protein 1 like	-0.352	0.00902
A_33_P3298024		ABCC3	ATP binding cassette subfamily C member 3	-0.162	0.00903
A_23_P76245	D	SCN8A	sodium channel, voltage gated, type VIII alpha subunit	-0.201	0.00904
A_33_P3842770		LOC101928669	uncharacterized LOC101928669	-0.318	0.00906
A_33_P3284508		CD14	CD14 molecule	0.16	0.00908
A_23_P332908		ZFC3H1	zinc finger, C3H1-type containing	-0.147	0.00911
A_23_P145786		MLXIPL	MLX interacting protein-like	-0.422	0.00912
A_24_P316102		MLLT10	myeloid/lymphoid or mixed-lineage leukemia; translocated to, 10	-0.144	0.00913
A_21_P0006597				-0.279	0.00916
A_23_P121716		ANXA3	annexin A3	0.21	0.00918
A_19_P00324604		C17orf51	chromosome 17 open reading frame 51	0.162	0.0092
A_21_P0009730		ZNF582-AS1	ZNF582 antisense RNA 1 (head to head)	0.127	0.00924
A_23_P80048		FER1L4	fer-1-like family member 4, pseudogene (functional)	-0.363	0.00927
A_24_P665504	D	LOC100133331	uncharacterized LOC100133331	-0.424	0.00927
A_21_P0011395	D	HERC2	HECT and RLD domain containing E3 ubiquitin protein ligase 2	-0.229	0.00929
A_33_P3216517		NEK6	NIMA related kinase 6	-0.205	0.00929
A_23_P59138		POU5F1	POU class 5 homeobox 1	-0.308	0.0093
A_33_P3328410		LOC101927789	putative ubiquitin-like protein FUBI-like protein ENSP00000310146	-0.218	0.00931
A_32_P190488				-0.16	0.00932
A_19_P00811440				0.349	0.00936
A_21_P0003558				-0.178	0.00939
A_32_P215179		NPIPA8 (includes others)	nuclear pore complex interacting protein family member A1	-0.237	0.00946
A_33_P3240115		SEPT8	septin 8	0.209	0.00949
A_23_P166663		APPL1	adaptor protein, phosphotyrosine interaction, PH domain and leucine zipper containing 1	-0.131	0.0095
A_24_P83183		NELFA	negative elongation factor complex member A	0.14	0.00952
A_23_P150852		ESYT1	extended synaptotagmin-like protein 1	-0.11	0.00955
A_33_P3304655		LTBP1	latent transforming growth factor beta binding protein 1	-0.218	0.00957
A_33_P3227904		SLC25A34	solute carrier family 25 member 34	-0.23	0.0096
A_23_P34835	D	LMNA	lamin A/C	-0.107	0.00961
A_21_P0000942				0.353	0.00962
A_33_P3491294		AMDHD2	amidohydrolase domain containing 2	-0.145	0.00971
A_33_P3294459		COPG2IT1	COPG2 imprinted transcript 1 (non-protein coding)	-0.446	0.00974
A_33_P3245290		AQP7P1	aquaporin 7 pseudogene 1	-0.421	0.00979
A_23_P111132		HSPA1A/HSPA1B	heat shock protein family A (Hsp70) member 1A	0.11	0.0098
A_24_P238143		LRRC37A3 (includes others)	leucine-rich repeat containing 37 member A3	-0.183	0.0098
A_19_P00319465	D	MAVS	mitochondrial antiviral signaling protein	-0.171	0.00981
A_21_P0013833				0.271	0.00982
A_23_P215318		VPS41	VPS41 HOPS complex subunit	-0.139	0.00985
A_23_P14124		RASL11A	RAS-like family 11 member A	0.226	0.00986
A_32_P122940		LOC642852	uncharacterized LOC642852	-0.127	0.00986
A_24_P58037				0.202	0.00995
A_33_P3267150				-0.247	0.00995
A_21_P0012609				0.179	0.01
A_23_P159893		CHRDL1	chordin-like 1	0.111	0.01
A_23_P362824		CSTF1	cleavage stimulation factor, 3' pre-RNA, subunit 1	0.097	0.01
A_33_P3225066		DNAJC12	DnaJ heat shock protein family (Hsp40) member C12	0.174	0.01
A_32_P75425		LINC01061	long intergenic non-protein coding RNA 1061	-0.392	0.01
A_21_P0013960				0.158	0.0101
A_23_P206454		CENPBD1	CENPB DNA-binding domain containing 1	0.131	0.0101
A_23_P18213		DNAH1	dynein, axonemal, heavy chain 1	-0.211	0.0101
A_32_P231086	D	GOLGA6L9 (includes others)	golgin A6 family-like 9	-0.268	0.0101
A_24_P20873		HIST1H4I	histone cluster 1, H4i	0.133	0.0101
A_33_P3331726		LINC00657	non-coding RNA activated by DNA damage	0.166	0.0101
A_23_P26928		CCDC103	coiled-coil domain containing 103	0.231	0.0102
A_24_P254965		HDAC8	histone deacetylase 8	-0.139	0.0102
A_33_P3421984		HYAL4	hyaluronoglucosaminidase 4	0.349	0.0102
A_33_P3355014		TMEM229B	transmembrane protein 229B	0.178	0.0102
A_23_P159227		ADAM15	ADAM metallopeptidase domain 15	-0.119	0.0103
A_24_P309645		TPCN1	two pore segment channel 1	-0.132	0.0103
A_23_P206856		WDR59	WD repeat domain 59	-0.16	0.0103
A_33_P3445679		LINC00548	long intergenic non-protein coding RNA 548	-0.304	0.0103
A_21_P0011742		LINC00665	long intergenic non-protein coding RNA 665	-0.16	0.0103
A_19_P00323022	D	LINC00963	long intergenic non-protein coding RNA 963	0.137	0.0103
A_33_P3221843		COQ3	coenzyme Q3 methyltransferase	0.217	0.0104
A_23_P69586		FAT1	FAT atypical cadherin 1	-0.212	0.0104
A_33_P3522525		GRPEL1	GrpE-like 1, mitochondrial (E. coli)	-0.141	0.0104
A_33_P3215640		PI16	peptidase inhibitor 16	0.225	0.0104
A_23_P368101		SAP30L	SAP30-like	0.098	0.0104
A_23_P138435		ZMIZ1	zinc finger, MIZ-type containing 1	-0.126	0.0104
A_33_P3226955				-0.169	0.0105
A_19_P00327297				-0.332	0.0105
A_23_P41976		CCDC127	coiled-coil domain containing 127	0.118	0.0105
A_33_P3243878	D	GOLGA6L9 (includes others)	golgin A6 family-like 9	-0.352	0.0105
A_33_P3833256		LOC440028	uncharacterized LOC440028	0.14	0.0105
A_21_P0004331				0.156	0.0106
A_24_P254551		ARHGEF9	Cdc42 guanine nucleotide exchange factor 9	-0.164	0.0106
A_21_P0013965	D	SMG1	SMG1 phosphatidylinositol 3-kinase-related kinase	-0.248	0.0106
A_23_P201845		ZMYM6	zinc finger, MYM-type 6	-0.153	0.0106
A_33_P3243168		MZF1	myeloid zinc finger 1	-0.204	0.0107
A_24_P276816		RCOR3	REST corepressor 3	0.119	0.0107
A_33_P3249489		WDR89	WD repeat domain 89	0.179	0.0107
A_33_P3234667		ZKSCAN1	zinc finger with KRAB and SCAN domains 1	-0.152	0.0107
A_24_P636332		CCDC84	coiled-coil domain containing 84	-0.274	0.0108
A_33_P3248424		OTULIN	OTU deubiquitinase with linear linkage specificity	0.163	0.0108
A_33_P3225760		PCDH18	protocadherin 18	0.2	0.0108
A_21_P0004354				0.264	0.0109
A_23_P71591		NOL8	nucleolar protein 8	-0.113	0.0109
A_32_P116206		RELL1	RELT-like 1	0.133	0.0109
A_23_P39185		RDH13	retinol dehydrogenase 13 (all-trans/9-cis)	-0.146	0.0109
A_23_P42768		SRRM3	serine/arginine repetitive matrix 3	0.263	0.0109
A_24_P153576		SHPRH	SNF2 histone linker PHD RING helicase, E3 ubiquitin protein ligase	-0.181	0.0109
A_33_P3411397	D	SLC25A6	solute carrier family 25 (mitochondrial carrier; adenine nucleotide translocator), member 6	-0.136	0.0109
A_21_P0003973		LOC101929544	uncharacterized LOC101929544	-0.277	0.0109
A_21_P0009928		LOC388780	uncharacterized LOC388780	0.381	0.0109
A_33_P3385477	D	ATAD3B	ATPase family, AAA domain containing 3B	-0.199	0.011
A_24_P892472		EMX2OS	EMX2 opposite strand/antisense RNA	0.102	0.011
A_21_P0010978	D	NEAT1	nuclear paraspeckle assembly transcript 1 (non-protein coding)	-0.771	0.011
A_23_P20722		SNAPC4	small nuclear RNA activating complex polypeptide 4	-0.153	0.011
A_23_P251232		TTTY14	testis-specific transcript, Y-linked 14 (non-protein coding)	-0.362	0.011
A_23_P41588		HARS2	histidyl-tRNA synthetase 2	-0.089	0.0111
A_33_P3346222		MSH5	mutS homolog 5	-0.145	0.0111
A_21_P0000463		SNORD105B	small nucleolar RNA, C/D box 105B	0.225	0.0111
A_21_P0012564				-0.094	0.0112
A_33_P3213134				-0.192	0.0112
A_21_P0014231				-0.202	0.0112
A_19_P00317237				-0.245	0.0112
A_21_P0006415				-0.375	0.0112
A_24_P481375		LOC100131564	CCDC18 antisense RNA 1	-0.371	0.0112
A_33_P3722568		LINC00685	long intergenic non-protein coding RNA 685	-0.506	0.0112
A_33_P3544880				-0.332	0.0113
A_23_P97021		AGO3	argonaute 3, RISC catalytic component	-0.106	0.0113
A_33_P3390773		TRIM66	tripartite motif containing 66	-0.3	0.0113
A_33_P3252322	D	LOC729162	uncharacterized LOC729162	-0.173	0.0113
A_33_P3390177		LINC00884	long intergenic non-protein coding RNA 884	0.3	0.0113
A_21_P0010388				0.229	0.0114
A_23_P162782		ARGLU1	arginine and glutamate rich 1	-0.139	0.0114
A_21_P0011816		IGSF3	immunoglobulin superfamily member 3	-0.268	0.0114
A_23_P117582		JDP2	Jun dimerization protein 2	0.131	0.0114
A_33_P3244317		MESDC2	mesoderm development candidate 2	0.171	0.0114
A_21_P0000473		SNORA84	small nucleolar RNA, H/ACA box 84	-0.204	0.0114
A_33_P3518572		LINC00941	long intergenic non-protein coding RNA 941	0.248	0.0114
A_33_P3413962	D	PFKP	phosphofructokinase, platelet	-0.165	0.0115
A_24_P586390	D	LOC100133331	uncharacterized LOC100133331	-0.299	0.0115
A_21_P0000393		SNORD99	small nucleolar RNA, C/D box 99	-0.191	0.0115
A_24_P318593		SCRN2	secernin 2	-0.176	0.0116
A_32_P190461		LOC101926918	uncharacterized LOC101926918	-0.397	0.0116
A_19_P00315716		SNORA71A	small nucleolar RNA, H/ACA box 71A	0.174	0.0116
A_33_P3364964				0.279	0.0117
A_24_P195724				-0.112	0.0117
A_33_P3252394		GADD45G	growth arrest and DNA damage inducible gamma	-0.165	0.0117
A_33_P3210278		SYNE2	spectrin repeat containing, nuclear envelope 2	-0.196	0.0117
A_24_P12413		TRAM2	translocation associated membrane protein 2	-0.172	0.0117
A_23_P123563		RPS6	ribosomal protein S6	-0.101	0.0118
A_19_P00322528		KIAA1671	KIAA1671	0.155	0.0119
A_33_P3262789		REEP6	receptor accessory protein 6	-0.243	0.0119
A_23_P416191		TAS2R31	taste 2 receptor member 31	-0.259	0.0119
A_21_P0012268		ADRBK2	adrenergic, beta, receptor kinase 2	-0.199	0.012
A_23_P359636		BROX	BRO1 domain and CAAX motif containing	0.173	0.012
A_33_P3278515		LOC101929231	uncharacterized LOC101929231	0.144	0.012
A_23_P142969	D	ZNF2	zinc finger protein 2	0.165	0.012
A_33_P3335030	D	ANKRD36	ankyrin repeat domain 36	-0.333	0.0121
A_23_P48977		MRPS11	mitochondrial ribosomal protein S11	-0.086	0.0121
A_33_P3308223	D	PDE4DIP	phosphodiesterase 4D interacting protein	-0.179	0.0121
A_33_P3294524	D	ANKRD12	ankyrin repeat domain 12	-0.152	0.0123
A_33_P3227284		OGT	O-linked N-acetylglucosamine (GlcNAc) transferase	-0.233	0.0123
A_21_P0014601		SFPQ	splicing factor proline/glutamine-rich	-0.249	0.0123
A_21_P0000276		SNORD87	small nucleolar RNA, C/D box 87	0.146	0.0123
A_24_P341089		ANKRD36BP2	ankyrin repeat domain 36B pseudogene 2	-0.224	0.0124
A_19_P00319407		ERVMER34-1	endogenous retrovirus group MER34 member 1	0.213	0.0124
A_33_P3294031		KCNQ1OT1	KCNQ1 opposite strand/antisense transcript 1 (non-protein coding)	-0.343	0.0124
A_23_P16562		SUGP2	SURP and G-patch domain containing 2	-0.294	0.0124
A_24_P785293		SNHG1	small nucleolar RNA host gene 1	-0.164	0.0124
A_33_P3375435	D	AGAP6 (includes others)	ArfGAP with GTPase domain, ankyrin repeat and PH domain 5	-0.205	0.0125
A_23_P61881		ARIH2	ariadne RBR E3 ubiquitin protein ligase 2	-0.088	0.0125
A_33_P3355708		C14orf180	chromosome 14 open reading frame 180	-0.282	0.0125
A_33_P3268564		NCK2	NCK adaptor protein 2	-0.201	0.0125
A_33_P3666884		PNPLA7	patatin like phospholipase domain containing 7	-0.341	0.0125
A_21_P0011967		SFRP4	secreted frizzled-related protein 4	0.219	0.0125
A_23_P59772		CLCN1	chloride channel, voltage-sensitive 1	-0.303	0.0126
A_21_P0013729		FRG1JP	FSHD region gene 1 family member J, pseudogene	0.117	0.0126
A_33_P3270514		HAND2-AS1	HAND2 antisense RNA 1 (head to head)	0.237	0.0126
A_24_P9285		LMAN2	lectin, mannose-binding 2	-0.115	0.0126
A_24_P142983		PI4KA	phosphatidylinositol 4-kinase, catalytic, alpha	-0.128	0.0126
A_24_P739582				0.144	0.0127
A_33_P3368830		LY9	lymphocyte antigen 9	0.256	0.0127
A_23_P424002		POU2F1	POU class 2 homeobox 1	-0.182	0.0127
A_21_P0013571		AQP7	aquaporin 7	-0.224	0.0128
A_23_P43690		BNC2	basonuclin 2	0.167	0.0128
A_33_P3373214		ZHX1-C8orf76	ZHX1-C8orf76 readthrough	0.138	0.0128
A_21_P0011468	D	HERC2	HECT and RLD domain containing E3 ubiquitin protein ligase 2	-0.197	0.0129
A_24_P333571		ARHGAP29	Rho GTPase activating protein 29	-0.284	0.0129
A_23_P21324		TWIST2	twist family bHLH transcription factor 2	0.189	0.0129
A_24_P681011		HIPK2	homeodomain interacting protein kinase 2	-0.146	0.013
A_23_P46396		PTBP2	polypyrimidine tract binding protein 2	-0.158	0.013
A_33_P3343290		PPTC7	PTC7 protein phosphatase homolog	0.175	0.013
A_23_P393401	D	PDXDC2P	pyridoxal-dependent decarboxylase domain containing 2, pseudogene	-0.514	0.013
A_23_P12363		ROR1	receptor tyrosine kinase-like orphan receptor 1	0.151	0.013
A_23_P82286		ZAN	zonadhesin (gene/pseudogene)	0.376	0.013
A_24_P178631				-0.254	0.0131
A_33_P3248394		INMT	indolethylamine N-methyltransferase	0.335	0.0131
A_23_P501822		JUP	junction plakoglobin	-0.154	0.0131
A_19_P00316675	D	MEG3	maternally expressed 3 (non-protein coding)	-0.349	0.0131
A_23_P46182		RPS8	ribosomal protein S8	-0.096	0.0131
A_33_P3244194		HACD2	3-hydroxyacyl-CoA dehydratase 2	0.158	0.0132
A_21_P0002474	D	ANKRD36	ankyrin repeat domain 36	-0.208	0.0132
A_33_P3392952		FOXK2	forkhead box K2	0.092	0.0132
A_23_P149992		PDLIM1	PDZ and LIM domain 1	0.132	0.0132
A_21_P0013441		RABGEF1	RAB guanine nucleotide exchange factor (GEF) 1	-0.175	0.0132
A_24_P807031		ATP6AP1L	ATPase, H+ transporting, lysosomal accessory protein 1-like	-0.16	0.0133
A_33_P3263277		EEF1A1	eukaryotic translation elongation factor 1 alpha 1	-0.11	0.0133
A_24_P119609		MYO1D	myosin ID	0.221	0.0133
A_33_P3380071		LOC100130673	phosphoribosyl pyrophosphate synthetase 2 pseudogene	-0.234	0.0133
A_33_P3265270		SLC17A5	solute carrier family 17 (acidic sugar transporter), member 5	0.161	0.0133
A_23_P355455		TBC1D5	TBC1 domain family member 5	0.118	0.0133
A_32_P129752		TMEM30B	transmembrane protein 30B	0.206	0.0133
A_23_P78099		VTN	vitronectin	0.194	0.0133
A_23_P327156		FUT8-AS1	FUT8 antisense RNA 1	0.176	0.0134
A_24_P239076		IGLL1/IGLL5	immunoglobulin lambda-like polypeptide 1	-0.297	0.0134
A_24_P117954		INO80C	INO80 complex subunit C	0.176	0.0134
A_32_P15421		RNF185	ring finger protein 185	0.126	0.0134
A_21_P0000223		SNORD15B	small nucleolar RNA, C/D box 15B	0.216	0.0134
A_24_P376309		PPP1R9B	protein phosphatase 1 regulatory subunit 9B	0.108	0.0135
A_24_P16610		ZNRF1	zinc and ring finger 1, E3 ubiquitin protein ligase	-0.117	0.0135
A_24_P218001		ZNF273	zinc finger protein 273	-0.191	0.0135
A_21_P0010308		LINC00649	long intergenic non-protein coding RNA 649	0.201	0.0135
A_33_P3392213				0.267	0.0136
A_21_P0010684				-0.267	0.0136
A_24_P191656		ACAD9	acyl-CoA dehydrogenase family member 9	-0.1	0.0136
A_23_P217379		COL4A6	collagen, type IV, alpha 6	-0.217	0.0136
A_32_P192376		ENPP1	ectonucleotide pyrophosphatase/phosphodiesterase 1	0.115	0.0136
A_32_P36694		JAZF1	JAZF zinc finger 1	0.133	0.0136
A_33_P3249748		THEM6	thioesterase superfamily member 6	0.135	0.0136
A_21_P0012528		LOC100134822	uncharacterized LOC100134822	-0.274	0.0136
A_32_P219116		CENPJ	centromere protein J	-0.16	0.0137
A_33_P3408762	D	LMNA	lamin A/C	-0.149	0.0137
A_19_P00316325	D	LINC01278	long intergenic non-protein coding RNA 1278	-0.169	0.0137
A_23_P415706		ADGRD1	adhesion G protein-coupled receptor D1	0.185	0.0138
A_23_P500364		BCL7B	B-cell CLL/lymphoma 7B	0.105	0.0138
A_23_P22672		ALG13	ALG13, UDP-N-acetylglucosaminyltransferase subunit	-0.183	0.0139
A_21_P0000140		LEPROT	leptin receptor overlapping transcript	0.139	0.0139
A_23_P61569		VAMP4	vesicle associated membrane protein 4	0.142	0.0139
A_33_P3292864				-0.182	0.014
A_33_P3399101		CTSL	cathepsin L	-0.279	0.014
A_33_P3302777		DCLK1	doublecortin like kinase 1	-0.221	0.014
A_24_P98555		FAM45A	family with sequence similarity 45 member A	0.157	0.014
A_24_P21887		PLCH2	phospholipase C eta 2	-0.287	0.014
A_23_P40059		PMS1	PMS1 homolog 1, mismatch repair system component	-0.1	0.014
A_21_P0013267		LOC729218	uncharacterized LOC729218	-0.216	0.014
A_33_P3229380	D	LINC01001 (includes others)	long intergenic non-protein coding RNA 1347	-0.23	0.014
A_21_P0012074				-0.293	0.0141
A_33_P3410351		GSTM2	glutathione S-transferase mu 2 (muscle)	0.192	0.0141
A_24_P136161		HNRNPCL1/HNRNPCL2	heterogeneous nuclear ribonucleoprotein C-like 1	0.149	0.0141
A_33_P3232120		NSMF	NMDA receptor synaptonuclear signaling and neuronal migration factor	-0.293	0.0141
A_33_P3224595		OFD1	oral-facial-digital syndrome 1	-0.214	0.0141
A_23_P251593		RPL10A	ribosomal protein L10a	-0.158	0.0141
A_33_P3223980		TPM3	tropomyosin 3	-0.106	0.0141
A_21_P0002270				-0.294	0.0142
A_33_P3340869		SCGB1B2P	secretoglobin family 1B member 2, pseudogene	-0.355	0.0142
A_24_P152983				-0.119	0.0143
A_24_P151834		ANKFY1	ankyrin repeat and FYVE domain containing 1	-0.339	0.0143
A_33_P3247540		LOC389834	ankyrin repeat domain 57 pseudogene	-0.234	0.0143
A_23_P48550		CEP170B	centrosomal protein 170B	-0.111	0.0143
A_19_P00800467		CLEC2D	C-type lectin domain family 2 member D	-0.111	0.0143
A_19_P00324839	D	MALAT1	metastasis associated lung adenocarcinoma transcript 1 (non-protein coding)	-0.428	0.0143
A_23_P71926		PRKACG	protein kinase, cAMP-dependent, gamma catalytic subunit	0.329	0.0143
A_23_P169934		RILPL1	Rab interacting lysosomal protein-like 1	-0.097	0.0143
A_21_P0009275				-0.238	0.0144
A_23_P81103		SFRP2	secreted frizzled-related protein 2	0.293	0.0144
A_33_P3214056		LINC00869	long intergenic non-protein coding RNA 869	0.091	0.0144
A_33_P3399114		CENPBD1P1	CENPB DNA-binding domains containing 1 pseudogene 1	0.11	0.0145
A_33_P3279109		ZNF75A	zinc finger protein 75a	-0.193	0.0145
A_33_P3403708				-0.179	0.0146
A_33_P3364869		NAMPT	nicotinamide phosphoribosyltransferase	-0.273	0.0146
A_33_P3382271		TRIP11	thyroid hormone receptor interactor 11	-0.159	0.0146
A_33_P3392000	D	LINC00963	long intergenic non-protein coding RNA 963	0.362	0.0146
A_21_P0002038				0.305	0.0147
A_21_P0005483				0.276	0.0147
A_33_P3270489		CCDC170	coiled-coil domain containing 170	0.186	0.0147
A_23_P431330		CRIPAK	cysteine-rich PAK1 inhibitor	-0.224	0.0147
A_23_P384698		EMC3-AS1	EMC3 antisense RNA 1	-0.194	0.0147
A_33_P3400152		ENTPD1-AS1	ENTPD1 antisense RNA 1	0.197	0.0147
A_33_P3406090				0.196	0.0148
A_33_P3210488		COL6A3	collagen, type VI, alpha 3	-0.231	0.0148
A_33_P3369646				0.197	0.0149
A_23_P14948		MBTPS1	membrane bound transcription factor peptidase, site 1	0.091	0.015
A_21_P0008870		SMG1P7	SMG1 pseudogene 7	-0.215	0.015
A_33_P3211327		TMEM262	transmembrane protein 262	0.335	0.015
A_33_P3563369		SNORA10	small nucleolar RNA, H/ACA box 10	-0.248	0.015
A_21_P0010679				-0.278	0.0152
A_33_P3269718		IVD	isovaleryl-CoA dehydrogenase	-0.115	0.0152
A_21_P0002483		LOC100506473	uncharacterized LOC100506473	-0.173	0.0152
A_33_P3272773		ZNF217	zinc finger protein 217	0.151	0.0152
A_33_P3327479		ZDHHC3	zinc finger, DHHC-type containing 3	-0.172	0.0152
A_21_P0009389				-0.166	0.0154
A_33_P3310961		ADD3-AS1	ADD3 antisense RNA 1	-0.186	0.0154
A_23_P9603		PRKDC	protein kinase, DNA-activated, catalytic polypeptide	-0.144	0.0154
A_33_P3382595		RN7SK	RNA, 7SK small nuclear	0.194	0.0154
A_23_P38328		DBF4B	DBF4 zinc finger B	-0.28	0.0155
A_33_P3247392		TPTE	transmembrane phosphatase with tensin homology	-0.244	0.0155
A_21_P0011301		WHAMMP2	WAS protein homolog associated with actin, golgi membranes and microtubules pseudogene 2	-0.124	0.0155
A_33_P3294921		PRUNE2	prune homolog 2 (Drosophila)	-0.213	0.0156
A_23_P423926		SS18L1	synovial sarcoma translocation gene on chromosome 18-like 1	-0.187	0.0156
A_19_P00810043		LOC401261	uncharacterized LOC401261	-0.317	0.0156
A_33_P3358893		PRM2	protamine 2	0.4	0.0157
A_33_P3344332		RPL39	ribosomal protein L39	0.101	0.0157
A_23_P377819	D	SRSF5	serine/arginine-rich splicing factor 5	-0.173	0.0157
A_21_P0010675	D	LINC01001 (includes others)	long intergenic non-protein coding RNA 1347	-0.288	0.0157
A_33_P3250383		CNP	2',3'-cyclic nucleotide 3' phosphodiesterase	0.204	0.0158
A_33_P3373715				0.152	0.0159
A_23_P28969		CHMP4B	charged multivesicular body protein 4B	-0.337	0.0159
A_33_P3272090	D	PDE4DIP	phosphodiesterase 4D interacting protein	-0.209	0.0159
A_23_P411102		DLG4	discs, large homolog 4 (Drosophila)	-0.249	0.016
A_33_P3306048		DPRXP4	divergent-paired related homeobox pseudogene 4	-0.206	0.016
A_21_P0012341		PI4KAP1	phosphatidylinositol 4-kinase, catalytic, alpha pseudogene 1	-0.275	0.016
A_33_P3319760		TAGLN2	transgelin 2	-0.125	0.016
A_23_P130089		IFT20	intraflagellar transport 20	0.126	0.0161
A_33_P3245348		KRTAP4-1	keratin associated protein 4-1	-0.23	0.0161
A_32_P216872	D	PDXDC2P	pyridoxal-dependent decarboxylase domain containing 2, pseudogene	-0.503	0.0161
A_23_P428248		TTC21A	tetratricopeptide repeat domain 21A	-0.251	0.0161
A_23_P95923		ZNF562	zinc finger protein 562	-0.122	0.0161
A_23_P141680	D	BCAS3	breast carcinoma amplified sequence 3	0.171	0.0162
A_33_P3392123		PCED1B-AS1	PCED1B antisense RNA 1	-0.349	0.0162
A_23_P82478		PUS7	pseudouridylate synthase 7 (putative)	-0.097	0.0162
A_24_P159837		ZNF302	zinc finger protein 302	-0.187	0.0162
A_21_P0012969		LINC01511	long intergenic non-protein coding RNA 1511	0.445	0.0162
A_21_P0002769				0.19	0.0163
A_23_P15944		ELAC1	elaC ribonuclease Z 1	0.14	0.0163
A_23_P2474		COPS7A	COP9 signalosome subunit 7A	-0.109	0.0164
A_24_P355649		FLI1	Fli-1 proto-oncogene, ETS transcription factor	0.144	0.0164
A_21_P0013231		INTS4P2	integrator complex subunit 4 pseudogene 2	0.154	0.0164
A_24_P128563		KPNA6	karyopherin alpha 6 (importin alpha 7)	0.105	0.0164
A_33_P3361182		PDCD11	programmed cell death 11	0.128	0.0164
A_32_P101301		USP39	ubiquitin specific peptidase 39	0.089	0.0164
A_21_P0014934		LOC100506124	uncharacterized LOC100506124	-0.219	0.0164
A_33_P3259740		LOC400661	uncharacterized LOC400661	0.219	0.0164
A_21_P0005934	D	HMBOX1	homeobox containing 1	-0.15	0.0165
A_33_P3357322		SMC2	structural maintenance of chromosomes 2	0.116	0.0165
A_23_P167096		VEGFC	vascular endothelial growth factor C	0.129	0.0165
A_23_P56298		ZNF430	zinc finger protein 430	-0.182	0.0165
A_23_P329573		ITGB2	integrin subunit beta 2	0.158	0.0166
A_23_P115792		PLEKHA1	pleckstrin homology domain containing A1	-0.126	0.0166
A_21_P0007713		LOC100506844	uncharacterized LOC100506844	0.133	0.0166
A_23_P4052		LOC79999	uncharacterized LOC79999	0.205	0.0166
A_24_P842172		LINC00965	long intergenic non-protein coding RNA 965	-0.161	0.0166
A_24_P933418	D	ABI2	abl-interactor 2	-0.141	0.0167
A_23_P144071		COL7A1	collagen, type VII, alpha 1	-0.225	0.0167
A_33_P3331237		G3BP1	GTPase activating protein (SH3 domain) binding protein 1	0.193	0.0167
A_33_P3249509		NFIC	nuclear factor I/C (CCAAT-binding transcription factor)	-0.124	0.0167
A_23_P81048		STIM2	stromal interaction molecule 2	0.131	0.0167
A_32_P56249		USP30-AS1	USP30 antisense RNA 1	0.179	0.0167
A_19_P00810982				-0.242	0.0168
A_33_P3784283		JAK1	Janus kinase 1	0.087	0.0168
A_23_P161190		VIM	vimentin	-0.131	0.0168
A_33_P3719214		LINC00355	long intergenic non-protein coding RNA 355	0.305	0.0168
A_32_P182662		AIDA	axin interactor, dorsalization associated	0.189	0.0169
A_23_P129221		FAH	fumarylacetoacetate hydrolase (fumarylacetoacetase)	-0.126	0.0169
A_33_P3246318		RBX1	ring-box 1, E3 ubiquitin protein ligase	0.115	0.0169
A_32_P167471		CLMN	calmin (calponin-like, transmembrane)	-0.219	0.017
A_33_P3211739		CREB3L2	cAMP responsive element binding protein 3-like 2	-0.128	0.017
A_24_P225518		CPTP	ceramide-1-phosphate transfer protein	-0.181	0.017
A_23_P63825		GOT1	glutamic-oxaloacetic transaminase 1, soluble	-0.144	0.017
A_23_P84929		SLC38A5	solute carrier family 38 member 5	-0.143	0.017
A_23_P146217		BAG4	BCL2 associated athanogene 4	0.185	0.0171
A_23_P256632		PGGT1B	protein geranylgeranyltransferase type I, beta subunit	0.146	0.0171
A_23_P84910		ZNF157	zinc finger protein 157	0.188	0.0171
A_33_P3391175				0.437	0.0172
A_23_P34045		EDA	ectodysplasin A	0.176	0.0172
A_33_P3263432		ITGA10	integrin subunit alpha 10	-0.246	0.0172
A_33_P3366146	D	SRSF5	serine/arginine-rich splicing factor 5	-0.172	0.0172
A_33_P3357062		DDX55	DEAD-box helicase 55	-0.106	0.0173
A_21_P0011311	D	GOLGA8J (includes others)	golgin A8 family member R	-0.341	0.0173
A_21_P0011291	D	HERC2	HECT and RLD domain containing E3 ubiquitin protein ligase 2	-0.128	0.0173
A_33_P3258660		SCD5	stearoyl-CoA desaturase 5	0.169	0.0173
A_33_P3767773		UBR4	ubiquitin protein ligase E3 component n-recognin 4	-0.119	0.0173
A_19_P00322966	D	LINC01278	long intergenic non-protein coding RNA 1278	0.156	0.0173
A_21_P0006911				0.507	0.0174
A_24_P27229		CSAD	cysteine sulfinic acid decarboxylase	-0.348	0.0174
A_24_P136551		NPLOC4	NPL4 homolog, ubiquitin recognition factor	-0.306	0.0174
A_33_P3362046		SHMT1	serine hydroxymethyltransferase 1 (soluble)	-0.336	0.0174
A_23_P142096		GPR32	G protein-coupled receptor 32	-0.174	0.0175
A_19_P00316396	D	MEG3	maternally expressed 3 (non-protein coding)	-0.401	0.0175
A_23_P48585		SALL2	spalt-like transcription factor 2	0.125	0.0175
A_33_P3252369		TMEM182	transmembrane protein 182	0.139	0.0175
A_33_P3212716		LOC101929998	uncharacterized LOC101929998	-0.15	0.0175
A_33_P3304748				-0.257	0.0176
A_21_P0014321		ATP2A1-AS1	ATP2A1 antisense RNA 1	0.114	0.0176
A_32_P109704		SFSWAP	splicing factor, suppressor of white-apricot family	-0.16	0.0177
A_21_P0002923		LINC01063	long intergenic non-protein coding RNA 1063	0.255	0.0177
A_24_P171873		FBXO4	F-box protein 4	0.17	0.0178
A_21_P0011381	D	GOLGA6L9 (includes others)	golgin A6 family-like 9	-0.31	0.0178
A_23_P78795		MEIS3	Meis homeobox 3	0.141	0.0178
A_33_P3362770		RRN3	RRN3 homolog, RNA polymerase I transcription factor	-0.229	0.0178
A_33_P3399870		CERS6	ceramide synthase 6	0.14	0.0179
A_24_P192434		TERF1	telomeric repeat binding factor (NIMA-interacting) 1	0.105	0.0179
A_24_P11315		OLFML3	olfactomedin like 3	0.112	0.018
A_23_P55064		WRAP53	WD repeat containing, antisense to TP53	-0.155	0.018
A_23_P330419		ACPT	acid phosphatase, testicular	-0.248	0.0181
A_19_P00811196		APTR	Alu-mediated CDKN1A/p21 transcriptional regulator (non-protein coding)	0.154	0.0181
A_33_P3282489		GCNT1	glucosaminyl (N-acetyl) transferase 1, core 2	0.119	0.0181
A_21_P0000202		MGAT4B	mannosyl (alpha-1,3-)-glycoprotein beta-1,4-N-acetylglucosaminyltransferase, isozyme B	0.126	0.0181
A_23_P207742		THRA	thyroid hormone receptor, alpha	0.124	0.0181
A_21_P0000515		VTRNA1-3	vault RNA 1-3	0.144	0.0182
A_23_P104804		ZBTB16	zinc finger and BTB domain containing 16	-0.1	0.0182
A_23_P107684		ZNF324	zinc finger protein 324	-0.137	0.0182
A_23_P97123		ANKRD36BP1	ankyrin repeat domain 36B pseudogene 1	0.144	0.0183
A_23_P70045		H2AFY	H2A histone family member Y	-0.092	0.0183
A_24_P315921		PPIEL	peptidylprolyl isomerase E like pseudogene	-0.239	0.0183
A_23_P80832		TMEM41A	transmembrane protein 41A	0.16	0.0183
A_23_P206501		CLEC18B	C-type lectin domain family 18 member B	-0.208	0.0184
A_23_P368740		HDAC10	histone deacetylase 10	-0.379	0.0184
A_33_P3404126		PCGF3	polycomb group ring finger 3	0.126	0.0184
A_33_P3372566		ABCC10	ATP binding cassette subfamily C member 10	-0.358	0.0185
A_32_P524614		C17orf74	chromosome 17 open reading frame 74	-0.255	0.0185
A_23_P395595		FNBP4	formin binding protein 4	-0.169	0.0185
A_24_P296508		SLC43A2	solute carrier family 43 (amino acid system L transporter), member 2	0.147	0.0185
A_23_P83175		HACD4	3-hydroxyacyl-CoA dehydratase 4	0.163	0.0186
A_23_P363826		FBXO3	F-box protein 3	0.155	0.0186
A_33_P3373459		CHST12	carbohydrate (chondroitin 4) sulfotransferase 12	0.107	0.0187
A_23_P82412	D	NSUN5	NOP2/Sun RNA methyltransferase family member 5	-0.215	0.0187
A_23_P26094		SLTM	SAFB like transcription modulator	-0.105	0.0187
A_33_P3277447		SLC26A2	solute carrier family 26 (anion exchanger), member 2	0.138	0.0187
A_33_P3390758		HSPA8	heat shock protein family A (Hsp70) member 8	-0.081	0.0188
A_24_P349002		POM121/POM121C	POM121 transmembrane nucleoporin	-0.119	0.0188
A_21_P0011263				0.136	0.0189
A_23_P217384	D	AP1S2	adaptor related protein complex 1 sigma 2 subunit	0.133	0.0189
A_33_P3381454		C1orf56	chromosome 1 open reading frame 56	0.124	0.0189
A_33_P3308833		C21orf58	chromosome 21 open reading frame 58	-0.191	0.0189
A_33_P3345608		EDRF1	erythroid differentiation regulatory factor 1	0.137	0.0189
A_23_P37623	D	GOLGA8A/GOLGA8B	golgin A8 family member A	-0.329	0.0189
A_19_P00316398	D	MEG3	maternally expressed 3 (non-protein coding)	-0.356	0.0189
A_21_P0010576		LOC101926980	uncharacterized LOC101926980	-0.155	0.0189

## Sheet: RNA BPS at 10 nM
ID	Duplication	Symbol	Gene Name	log2FC	Pvalue
A_23_P217015		SET	SET nuclear proto-oncogene	-0.439	7.38e-09
A_32_P83465	D	NBPF15 (includes others)	neuroblastoma breakpoint family member 15	-0.474	2.21e-08
A_33_P3471712		LOC284600	uncharacterized LOC284600	-0.248	2.55e-08
A_33_P3368186				-0.448	3.04e-08
A_33_P3321657	D	HSPG2	heparan sulfate proteoglycan 2	-0.441	3.23e-08
A_33_P3363515		XRCC3	X-ray repair complementing defective repair in Chinese hamster cells 3	-0.468	3.36e-08
A_33_P3567967		LOC55338	uncharacterized LOC55338	-0.492	3.99e-08
A_33_P3315763				-0.373	4.55e-08
A_33_P3802146	D	LINC00504		-0.432	5.22e-08
A_33_P3404097		PGM5P2	phosphoglucomutase 5 pseudogene 2	-0.524	1.34e-07
A_33_P3268900		BNIP3L	BCL2/adenovirus E1B 19kDa interacting protein 3-like	-0.427	1.42e-07
A_33_P3293114	D	SRSF11	serine/arginine-rich splicing factor 11	-0.381	1.73e-07
A_33_P3266165				-0.436	1.74e-07
A_23_P14389		ACIN1	apoptotic chromatin condensation inducer 1	-0.363	1.98e-07
A_33_P3252612		CYP2W1	cytochrome P450 family 2 subfamily W member 1	-0.372	2.02e-07
A_33_P3210288		FUT6	fucosyltransferase 6	-0.382	2.31e-07
A_33_P3296852	D	LOC729162	uncharacterized LOC729162	-0.258	2.34e-07
A_19_P00804777		LINC00662	long intergenic non-protein coding RNA 662	-0.528	2.39e-07
A_33_P3328619				-0.47	2.58e-07
A_24_P943393	D	AHNAK	AHNAK nucleoprotein	-0.277	3.1e-07
A_33_P3219720		ZNF248	zinc finger protein 248	-0.554	3.68e-07
A_33_P3244998		ODF2L	outer dense fiber of sperm tails 2-like	-0.438	4.38e-07
A_21_P0003093				-0.402	4.52e-07
A_33_P3379436		FAM74A4	family with sequence similarity 74 member A4	-0.239	4.56e-07
A_21_P0010981	D	MALAT1	metastasis associated lung adenocarcinoma transcript 1 (non-protein coding)	-0.402	4.64e-07
A_33_P3280044	D	ANKRD11	ankyrin repeat domain 11	-0.326	5.1e-07
A_33_P3228988		LOC105372277	zinc finger protein 799-like	-0.441	6.34e-07
A_33_P3382105				-0.377	6.52e-07
A_33_P3212823	D	NPIPB3 (includes others)	nuclear pore complex interacting protein family, member B3	-0.597	6.67e-07
A_33_P3290909		SMC1A	structural maintenance of chromosomes 1A	-0.313	9.05e-07
A_33_P3231005				-0.596	1.05e-06
A_19_P00317023	D	PVT1	Pvt1 oncogene (non-protein coding)	-0.626	1.1e-06
A_33_P3305117				-0.51	1.13e-06
A_33_P3249509		NFIC	nuclear factor I/C (CCAAT-binding transcription factor)	-0.302	1.21e-06
A_33_P3239267		FAM212A	family with sequence similarity 212 member A	-0.463	1.22e-06
A_33_P3371752		EPS15	epidermal growth factor receptor pathway substrate 15	-0.421	1.26e-06
A_33_P3321678		RNF180	ring finger protein 180	-0.558	1.28e-06
A_33_P3380837		AMZ1	archaelysin family metallopeptidase 1	-0.602	1.29e-06
A_23_P339053		C16orf52	chromosome 16 open reading frame 52	-0.256	1.31e-06
A_33_P3280066		PTRF	polymerase I and transcript release factor	-0.447	1.5e-06
A_33_P3421219		LOC647070	uncharacterized LOC647070	-0.582	1.58e-06
A_33_P3236267	D	LINC00504		-0.424	1.66e-06
A_21_P0006998				-0.418	1.97e-06
A_21_P0000222		SNORD46	small nucleolar RNA, C/D box 46	0.425	2.04e-06
A_33_P3310232		L2HGDH	L-2-hydroxyglutarate dehydrogenase	-0.557	2.05e-06
A_33_P3366124		KANTR	KDM5C adjacent non-coding transcript	-0.271	2.06e-06
A_24_P161293	D	NBPF15 (includes others)	neuroblastoma breakpoint family member 15	-0.462	2.1e-06
A_33_P3451157		LINC00937	long intergenic non-protein coding RNA 937	-0.591	2.21e-06
A_19_P00800555				-0.544	2.25e-06
A_33_P3827416		CTGLF12P	ArfGAP with GTPase domain, ankyrin repeat and PH domain 12, pseudogene	-0.472	2.6e-06
A_21_P0010724	D	LOC645166	lymphocyte-specific protein 1 pseudogene	-0.404	2.72e-06
A_33_P3787904		LOC100506679	uncharacterized LOC100506679	-0.454	2.81e-06
A_33_P3324333		ANKRD20A5P	ankyrin repeat domain 20 family member A5, pseudogene	-0.461	2.93e-06
A_32_P59302		HIVEP3	human immunodeficiency virus type I enhancer binding protein 3	-0.371	3.11e-06
A_33_P3224971				-0.551	3.4e-06
A_33_P3759592		FLJ13773	uncharacterized LOC246318	-0.445	3.4e-06
A_33_P3354499				-0.567	3.66e-06
A_19_P00320028	D	LINC01004	long intergenic non-protein coding RNA 1004	-0.491	3.72e-06
A_23_P117971				-0.672	3.85e-06
A_23_P259357		SLC35E4	solute carrier family 35 member E4	-0.466	4.07e-06
A_33_P3410831		LOC729609	uncharacterized LOC729609	-0.463	4.26e-06
A_33_P3479999		PHBP19	prohibitin pseudogene 19	-0.408	4.32e-06
A_23_P156807	D	CFLAR	CASP8 and FADD like apoptosis regulator	-0.389	4.33e-06
A_33_P3752697				-0.511	4.35e-06
A_32_P171181	D	NBPF15 (includes others)	neuroblastoma breakpoint family member 15	-0.355	4.51e-06
A_21_P0014729		POLR2J4	polymerase (RNA) II (DNA directed) polypeptide J4, pseudogene	-0.465	4.84e-06
A_19_P00316844	D	HCG18	HLA complex group 18 (non-protein coding)	-0.345	4.9e-06
A_33_P3297599				-0.676	5.18e-06
A_33_P3275959		SLC25A16	solute carrier family 25 (mitochondrial carrier), member 16	-0.437	5.21e-06
A_33_P3640690		ZEB1	zinc finger E-box binding homeobox 1	-0.291	5.21e-06
A_33_P3378531		AS3MT	arsenite methyltransferase	-0.244	5.39e-06
A_21_P0006569		LOC102724491	uncharacterized LOC102724491	-0.56	5.65e-06
A_33_P3645805		LOC149401	uncharacterized LOC149401	-0.494	6.26e-06
A_33_P3308223	D	PDE4DIP	phosphodiesterase 4D interacting protein	-0.415	6.49e-06
A_33_P3678883				-0.505	6.63e-06
A_23_P14649		ANP32A-IT1	ANP32A intronic transcript 1	-0.497	6.75e-06
A_33_P3405285		GSG1	germ cell associated 1	-0.485	6.75e-06
A_23_P108932		RPL23AP32	ribosomal protein L23a pseudogene 32	-0.512	6.86e-06
A_33_P3265606		GCLM	glutamate-cysteine ligase, modifier subunit	-0.549	7.34e-06
A_33_P3349474				-0.408	7.35e-06
A_33_P3255499		SLC25A51	solute carrier family 25 member 51	-0.504	7.51e-06
A_33_P3228252				-0.43	7.57e-06
A_32_P120604		SNX29	sorting nexin 29	-0.695	7.67e-06
A_19_P00318280		LOC100506860	uncharacterized LOC100506860	-0.439	7.98e-06
A_33_P3244872		CEP350	centrosomal protein 350kDa	-0.265	8.29e-06
A_33_P3233170				-0.276	8.35e-06
A_33_P3331791				-0.567	9.44e-06
A_33_P3263523		C1orf35	chromosome 1 open reading frame 35	-0.291	9.54e-06
A_24_P366777	D	LOC100996763/NOTCH2NL	notch 2 N-terminal like	-0.362	1.02e-05
A_33_P3289218		AAK1	AP2 associated kinase 1	-0.357	1.04e-05
A_33_P3384442		LAMA5	laminin subunit alpha 5	-0.503	1.05e-05
A_33_P3320393		MRPS16	mitochondrial ribosomal protein S16	-0.395	1.05e-05
A_33_P3220437		TNFAIP8L1	TNF alpha induced protein 8 like 1	-0.568	1.09e-05
A_33_P3374952		KLF17	Kruppel-like factor 17	-0.629	1.11e-05
A_33_P3298413		PPIH	peptidylprolyl isomerase H	0.27	1.36e-05
A_33_P3274428				-0.492	1.42e-05
A_33_P3349395		CECR2	cat eye syndrome chromosome region, candidate 2	-0.422	1.42e-05
A_33_P3382147		STARD13	StAR related lipid transfer domain containing 13	-0.403	1.43e-05
A_33_P3358158		CRYBB2P1	crystallin beta B2 pseudogene 1	-0.396	1.46e-05
A_33_P3309231		HSCB	HscB mitochondrial iron-sulfur cluster co-chaperone	-0.273	1.51e-05
A_33_P3219697		ANKRD45	ankyrin repeat domain 45	-0.54	1.54e-05
A_33_P3332690	D	SUZ12P1	SUZ12 polycomb repressive complex 2 subunit pseudogene 1	-0.484	1.56e-05
A_21_P0014132				-0.241	1.6e-05
A_33_P3385765		ZNF763	zinc finger protein 763	-0.544	1.62e-05
A_33_P3241596				-0.761	1.65e-05
A_23_P22352		FRMD4A	FERM domain containing 4A	-0.54	1.71e-05
A_23_P164022		MYO1C	myosin IC	-0.404	1.77e-05
A_23_P144531		ALPK1	alpha kinase 1	-0.583	1.81e-05
A_19_P00325912	D	HCG18	HLA complex group 18 (non-protein coding)	-0.491	1.94e-05
A_33_P3537875				-0.525	2e-05
A_33_P3341722				-0.239	2.01e-05
A_33_P3390570	D	KMT2A	lysine (K)-specific methyltransferase 2A	-0.253	2.03e-05
A_33_P3248863		KRBA2	KRAB-A domain containing 2	-0.601	2.1e-05
A_33_P3503937		LOC284581	uncharacterized LOC284581	-0.57	2.11e-05
A_33_P3884230		NFIX	nuclear factor I/X (CCAAT-binding transcription factor)	-0.222	2.15e-05
A_33_P3353496		GJD4	gap junction protein delta 4	-0.445	2.17e-05
A_24_P2648	D	PTPN14	protein tyrosine phosphatase, non-receptor type 14	-0.242	2.2e-05
A_33_P3209176				-0.555	2.21e-05
A_33_P3360887		HELZ2	helicase with zinc finger 2, transcriptional coactivator	-0.497	2.24e-05
A_33_P3351934	D	MSTO1	misato 1, mitochondrial distribution and morphology regulator	-0.494	2.25e-05
A_33_P3307894				-0.318	2.41e-05
A_19_P00319201		CCDC149	coiled-coil domain containing 149	-0.292	2.41e-05
A_21_P0003214				-0.49	2.49e-05
A_33_P3559138				-0.388	2.52e-05
A_23_P218892		EIF4G1	eukaryotic translation initiation factor 4 gamma, 1	-0.166	2.53e-05
A_21_P0011466				-0.426	2.55e-05
A_21_P0008919				-0.538	2.61e-05
A_23_P426636	D	AHNAK	AHNAK nucleoprotein	-0.323	2.83e-05
A_33_P3225696		ZNF526	zinc finger protein 526	-0.458	2.85e-05
A_19_P00805705	D	HECTD4	HECT domain containing E3 ubiquitin protein ligase 4	-0.303	2.96e-05
A_23_P109907		ILDR1	immunoglobulin-like domain containing receptor 1	-0.674	2.97e-05
A_21_P0001152				-0.534	2.98e-05
A_21_P0013340	D	CCZ1/CCZ1B	CCZ1 homolog, vacuolar protein trafficking and biogenesis associated	-0.545	3.06e-05
A_33_P3278407		MLLT4	myeloid/lymphoid or mixed-lineage leukemia; translocated to, 4	-0.249	3.09e-05
A_33_P3287388				-0.518	3.3e-05
A_23_P170857		IL1RAP	interleukin 1 receptor accessory protein	0.259	3.32e-05
A_33_P3877728		SMCR6	Smith-Magenis syndrome chromosome region, candidate 6 (non-protein coding)	-0.553	3.32e-05
A_33_P3392677				-0.361	3.46e-05
A_33_P3209522		SLFN5	schlafen family member 5	-0.372	3.5e-05
A_33_P3609431				-0.504	3.52e-05
A_33_P3322430				-0.501	3.56e-05
A_21_P0012246				-0.481	3.61e-05
A_33_P3215906	D	NBPF15 (includes others)	neuroblastoma breakpoint family member 15	-0.351	3.74e-05
A_23_P162782		ARGLU1	arginine and glutamate rich 1	-0.264	3.76e-05
A_24_P324405	D	ANKRD11	ankyrin repeat domain 11	-0.369	3.81e-05
A_23_P332908		ZFC3H1	zinc finger, C3H1-type containing	-0.238	3.92e-05
A_24_P65507		STRA13	stimulated by retinoic acid 13	-0.22	3.94e-05
A_33_P3503537		LOC285178	uncharacterized LOC285178	-0.278	3.97e-05
A_21_P0012995				-0.573	4.11e-05
A_33_P3337044		SLC2A6	solute carrier family 2 (facilitated glucose transporter), member 6	-0.435	4.18e-05
A_33_P3721983				-0.381	4.28e-05
A_24_P102880		NAV1	neuron navigator 1	-0.312	4.29e-05
A_24_P309645		TPCN1	two pore segment channel 1	-0.238	4.39e-05
A_23_P14774		CTSH	cathepsin H	0.359	4.46e-05
A_33_P3789693				-0.595	4.63e-05
A_21_P0011551				-0.259	4.81e-05
A_33_P3454679		HAB1	B1 for mucin	-0.35	5.11e-05
A_33_P3290338		PARP1	poly(ADP-ribose) polymerase 1	-0.257	5.43e-05
A_33_P3409675		LOC442132	golgin A6 family-like 1 pseudogene	-0.552	5.45e-05
A_33_P3357062		DDX55	DEAD-box helicase 55	-0.198	5.47e-05
A_33_P3414903		NPL	N-acetylneuraminate pyruvate lyase (dihydrodipicolinate synthase)	-0.482	5.52e-05
A_33_P3760125		FAM224A	family with sequence similarity 224 member A (non-protein coding)	-0.56	5.6e-05
A_21_P0001673				-0.401	5.61e-05
A_23_P61881		ARIH2	ariadne RBR E3 ubiquitin protein ligase 2	-0.164	5.82e-05
A_33_P3397795		PCNXL4	pecanex-like 4 (Drosophila)	-0.552	6.02e-05
A_24_P152968	D	AKR1C1/AKR1C2	aldo-keto reductase family 1, member C2	-0.341	6.18e-05
A_21_P0002693				-0.657	6.25e-05
A_33_P3385561				-0.455	6.25e-05
A_33_P3325558		RABGAP1L	RAB GTPase activating protein 1-like	-0.427	6.41e-05
A_24_P138022		FAM120A	family with sequence similarity 120A	-0.19	6.53e-05
A_33_P3306616		C5orf28	chromosome 5 open reading frame 28	-0.566	6.56e-05
A_23_P372923		FGFR1	fibroblast growth factor receptor 1	-0.225	6.6e-05
A_21_P0011359				-0.329	6.61e-05
A_33_P3230876		ALG11	ALG11, alpha-1,2-mannosyltransferase	-0.234	6.68e-05
A_23_P97795		ACBD5	acyl-CoA binding domain containing 5	-0.25	6.7e-05
A_21_P0010876		BMS1P6	BMS1, ribosome biogenesis factor pseudogene 6	-0.323	7.1e-05
A_21_P0000225		SNORD83B	small nucleolar RNA, C/D box 83B	0.353	7.18e-05
A_23_P108501		EPHA4	EPH receptor A4	-0.246	7.51e-05
A_33_P3481987		SLC16A12	solute carrier family 16 member 12	-0.299	7.56e-05
A_33_P3294961		LAT2	linker for activation of T-cells family member 2	-0.567	7.8e-05
A_19_P00801585				-0.469	8e-05
A_33_P3253653		GPR155	G protein-coupled receptor 155	-0.174	8.09e-05
A_24_P729905	D	AGAP6 (includes others)	ArfGAP with GTPase domain, ankyrin repeat and PH domain 5	-0.408	8.11e-05
A_23_P336513		GEMIN5	gem nuclear organelle associated protein 5	-0.202	8.4e-05
A_24_P693321		LOC100190986	uncharacterized LOC100190986	-0.597	8.4e-05
A_33_P3337277		LOC100129846	uncharacterized LOC100129846	-0.431	8.57e-05
A_33_P3290040		CPT1C	carnitine palmitoyltransferase 1C	-0.198	8.62e-05
A_21_P0011467	D	HERC2	HECT and RLD domain containing E3 ubiquitin protein ligase 2	-0.308	8.71e-05
A_21_P0003091				-0.568	8.84e-05
A_33_P3762913	D	LINC01004	long intergenic non-protein coding RNA 1004	-0.381	9.02e-05
A_33_P3389578				-0.559	9.14e-05
A_23_P203658		PICALM	phosphatidylinositol binding clathrin assembly protein	-0.268	9.14e-05
A_21_P0012391		LOC101927056	uncharacterized LOC101927056	-0.44	9.8e-05
A_33_P3319134				-0.484	0.0001
A_19_P00810474		CIC	capicua transcriptional repressor	-0.458	0.000106
A_23_P311740		CUL9	cullin 9	-0.266	0.000106
A_23_P359430	D	NBPF15 (includes others)	neuroblastoma breakpoint family member 15	-0.244	0.000109
A_24_P38815		TPP1	tripeptidyl peptidase I	0.225	0.000109
A_33_P3368800	D	NBPF15 (includes others)	neuroblastoma breakpoint family member 15	-0.327	0.000114
A_21_P0000336		SNORA54	small nucleolar RNA, H/ACA box 54	0.366	0.000117
A_33_P3380625	D	HSPG2	heparan sulfate proteoglycan 2	-0.509	0.000117
A_19_P00320047				-0.45	0.000122
A_33_P3292179		ABCA9	ATP binding cassette subfamily A member 9	-0.405	0.000122
A_33_P3327697		LOC145474	uncharacterized LOC145474	-0.39	0.000122
A_33_P3254510				-0.308	0.000126
A_23_P214360		IRF4	interferon regulatory factor 4	0.209	0.000129
A_33_P3369550	D	SRSF11	serine/arginine-rich splicing factor 11	-0.26	0.00013
A_19_P00318715	D	LINC-PINT	long intergenic non-protein coding RNA, p53 induced transcript	-0.292	0.000134
A_33_P3365878		BMP8B	bone morphogenetic protein 8b	-0.504	0.000135
A_33_P3408962		SCN8A	sodium channel, voltage gated, type VIII alpha subunit	-0.295	0.000135
A_33_P3339820		LEPR	leptin receptor	-0.28	0.000136
A_33_P3419938		VHL	von Hippel-Lindau tumor suppressor, E3 ubiquitin protein ligase	-0.308	0.000137
A_33_P3244728		LRP2	LDL receptor related protein 2	-0.441	0.000138
A_19_P00319465	D	MAVS	mitochondrial antiviral signaling protein	-0.291	0.00014
A_33_P3893191		DBIL5P2	diazepam binding inhibitor-like 5 pseudogene 2	-0.552	0.000143
A_21_P0000630		LOC643733	caspase 4, apoptosis-related cysteine peptidase pseudogene	0.287	0.000144
A_23_P96976		ZCCHC17	zinc finger, CCHC domain containing 17	-0.237	0.000145
A_33_P3327986				-0.539	0.000146
A_24_P216253		DLGAP4	discs, large (Drosophila) homolog-associated protein 4	-0.222	0.000148
A_33_P3248384		LOC105379655	uncharacterized LOC105379655	-0.409	0.000148
A_33_P3280003	D	HERC2	HECT and RLD domain containing E3 ubiquitin protein ligase 2	-0.291	0.00015
A_23_P359647		NFAT5	nuclear factor of activated T-cells 5, tonicity-responsive	-0.33	0.000153
A_21_P0002334				-0.369	0.000161
A_33_P3310047		SHROOM4	shroom family member 4	-0.523	0.000163
A_33_P3366073		EBPL	emopamil binding protein-like	-0.344	0.000166
A_33_P3286621	D	SCARNA16	small Cajal body-specific RNA 16	-0.485	0.000167
A_33_P3711318		LOC257152	uncharacterized LOC257152	-0.275	0.000168
A_33_P3407826				-0.404	0.000169
A_21_P0011429	D	HERC2	HECT and RLD domain containing E3 ubiquitin protein ligase 2	-0.352	0.000169
A_23_P115792		PLEKHA1	pleckstrin homology domain containing A1	-0.221	0.00017
A_33_P3232624	D	LOC100288069	uncharacterized LOC100288069	-0.382	0.000176
A_33_P3257513		FAT3	FAT atypical cadherin 3	-0.344	0.000177
A_21_P0003208				-0.541	0.000182
A_23_P156809		METTL21A	methyltransferase like 21A	-0.317	0.000188
A_21_P0011938	D	ANKRD36B	ankyrin repeat domain 36B	-0.256	0.000199
A_23_P124837	D	LRP1	LDL receptor related protein 1	-0.304	0.000199
A_33_P3555009		ZNF528-AS1	ZNF528 antisense RNA 1	-0.15	0.000205
A_23_P156049		HEXB	hexosaminidase B (beta polypeptide)	0.241	0.000206
A_32_P10133		PRINS	psoriasis associated non-protein coding RNA induced by stress	-0.489	0.000208
A_33_P3337415		GNAL	guanine nucleotide binding protein (G protein), alpha activating activity polypeptide, olfactory type	-0.431	0.000211
A_33_P3333033	D	SGSM2	small G protein signaling modulator 2	-0.66	0.000217
A_33_P3252322	D	LOC729162	uncharacterized LOC729162	-0.268	0.000219
A_33_P3380618	D	HSPG2	heparan sulfate proteoglycan 2	-0.335	0.000225
A_33_P3392123		PCED1B-AS1	PCED1B antisense RNA 1	-0.471	0.00023
A_23_P98431		HMBS	hydroxymethylbilane synthase	-0.145	0.000231
A_33_P3301381		RBM43	RNA binding motif protein 43	-0.445	0.000233
A_23_P104804		ZBTB16	zinc finger and BTB domain containing 16	-0.217	0.000234
A_33_P3225983				-0.332	0.000236
A_33_P3702281				-0.43	0.000241
A_33_P3280502				-0.378	0.000244
A_23_P211878		FLNB	filamin B	-0.204	0.000246
A_21_P0010394		MED15	mediator complex subunit 15	-0.441	0.000246
A_33_P3276068		TRAPPC3L	trafficking protein particle complex 3-like	-0.499	0.000247
A_33_P3331588	D	ATAD3B	ATPase family, AAA domain containing 3B	-0.256	0.000248
A_33_P3256695		PRPF40A	pre-mRNA processing factor 40 homolog A	-0.358	0.000252
A_23_P431330		CRIPAK	cysteine-rich PAK1 inhibitor	-0.322	0.000256
A_23_P159039		SCRIB	scribbled planar cell polarity protein	-0.191	0.00026
A_24_P358084	D	NPIPB3 (includes others)	nuclear pore complex interacting protein family, member B3	-0.356	0.000262
A_21_P0014738		TRIM73/TRIM74	tripartite motif containing 74	-0.389	0.000266
A_33_P3392366		LOC101929634	keratin-associated protein 5-1-like	-0.347	0.000267
A_33_P3275255				-0.391	0.000269
A_19_P00808348	D	LOC101927151	uncharacterized LOC101927151	-0.243	0.000272
A_19_P00320579	D	LINC-PINT	long intergenic non-protein coding RNA, p53 induced transcript	-0.335	0.000282
A_23_P125717		NAP1L3	nucleosome assembly protein 1-like 3	0.278	0.000283
A_33_P3335624		PSMD10	proteasome 26S subunit, non-ATPase 10	-0.627	0.000284
A_21_P0011465	D	SMG1	SMG1 phosphatidylinositol 3-kinase-related kinase	-0.353	0.000291
A_33_P3273969	D	ZC3H11A	zinc finger CCCH-type containing 11A	-0.218	0.000293
A_32_P1381	D	HMGN2	high mobility group nucleosomal binding domain 2	0.188	0.000302
A_33_P3231695		ZNF667	zinc finger protein 667	-0.225	0.000302
A_33_P3214314		CCSER2	coiled-coil serine rich protein 2	-0.176	0.000305
A_33_P3375613		C8orf44-SGK3/SGK3	serum/glucocorticoid regulated kinase family member 3	-0.386	0.00031
A_24_P151834		ANKFY1	ankyrin repeat and FYVE domain containing 1	-0.382	0.000311
A_21_P0011470	D	HERC2	HECT and RLD domain containing E3 ubiquitin protein ligase 2	-0.278	0.000314
A_24_P232790		CCDC177	coiled-coil domain containing 177	0.567	0.000316
A_21_P0008570				-0.472	0.000331
A_33_P3264612		TPCN2	two pore segment channel 2	-0.204	0.000338
A_21_P0010725	D	LOC645166	lymphocyte-specific protein 1 pseudogene	-0.546	0.000346
A_33_P3370461	D	SUZ12P1	SUZ12 polycomb repressive complex 2 subunit pseudogene 1	-0.341	0.000351
A_21_P0011395	D	HERC2	HECT and RLD domain containing E3 ubiquitin protein ligase 2	-0.33	0.000352
A_23_P389907		ATXN2	ataxin 2	-0.151	0.000357
A_33_P3338961				-0.522	0.000362
A_33_P3352980				-0.494	0.000366
A_21_P0011301		WHAMMP2	WAS protein homolog associated with actin, golgi membranes and microtubules pseudogene 2	-0.242	0.000367
A_33_P3274930				-0.387	0.000371
A_21_P0011808	D	ANKRD36	ankyrin repeat domain 36	-0.272	0.000376
A_21_P0012208				-0.323	0.000377
A_23_P85015		MAOB	monoamine oxidase B	0.253	0.000378
A_23_P44139		PRIM2	primase, DNA, polypeptide 2 (58kDa)	0.189	0.000378
A_33_P3514859		LOC101929709	uncharacterized LOC101929709	-0.34	0.000382
A_23_P218784		DDX17	DEAD-box helicase 17	-0.34	0.000392
A_33_P3337896	D	LOC100996724	phosphodiesterase 4D interacting protein-like	-0.531	0.000401
A_23_P26094		SLTM	SAFB like transcription modulator	-0.157	0.000401
A_33_P3335030	D	ANKRD36	ankyrin repeat domain 36	-0.344	0.000407
A_21_P0008390				-0.258	0.000409
A_21_P0011431	D	HERC2	HECT and RLD domain containing E3 ubiquitin protein ligase 2	-0.34	0.000409
A_33_P3272508		MRPL57	mitochondrial ribosomal protein L57	-0.273	0.000419
A_33_P3349469		ATAD3A	ATPase family, AAA domain containing 3A	-0.241	0.00042
A_19_P00803019		PWAR6	Prader Willi/Angelman region RNA 6	-0.274	0.000425
A_23_P93750		LSM5	LSM5 homolog, U6 small nuclear RNA and mRNA degradation associated	0.147	0.000437
A_23_P162874	D	HSP90AA1	heat shock protein 90kDa alpha family class A member 1	-0.187	0.000447
A_33_P3385477	D	ATAD3B	ATPase family, AAA domain containing 3B	-0.282	0.000451
A_19_P00805840		ZNF37BP	zinc finger protein 37B, pseudogene	-0.191	0.000461
A_19_P00315603				-0.334	0.000466
A_23_P391778	D	MACF1	microtubule-actin crosslinking factor 1	-0.191	0.000466
A_24_P167877	D	NPIPB3 (includes others)	nuclear pore complex interacting protein family, member B3	-0.636	0.000469
A_23_P39251		PLIN5	perilipin 5	-0.438	0.000472
A_24_P282108		ZZEF1	zinc finger, ZZ-type with EF-hand domain 1	-0.176	0.000474
A_33_P3225760		PCDH18	protocadherin 18	0.285	0.000489
A_33_P3422233		UVSSA	UV stimulated scaffold protein A	-0.298	0.000514
A_33_P3403708				-0.318	0.000526
A_23_P205575		GPR135	G protein-coupled receptor 135	-0.338	0.000527
A_23_P208706		BAX	BCL2-associated X protein	-0.467	0.000543
A_24_P349002		POM121/POM121C	POM121 transmembrane nucleoporin	-0.161	0.000543
A_23_P253571		PHF5A	PHD finger protein 5A	0.189	0.000551
A_33_P3236340				-0.366	0.000564
A_33_P3381305				-0.246	0.000574
A_21_P0002270				-0.562	0.000582
A_23_P258698		MANBA	mannosidase, beta A, lysosomal	0.135	0.000583
A_19_P00322977	D	LINC-PINT	long intergenic non-protein coding RNA, p53 induced transcript	-0.331	0.000585
A_23_P144916		GFPT2	glutamine-fructose-6-phosphate transaminase 2	-0.169	0.000587
A_33_P3422429		INADL	InaD-like (Drosophila)	-0.356	0.000588
A_33_P3245922		MAP3K4	mitogen-activated protein kinase kinase kinase 4	-0.218	0.000594
A_21_P0011934	D	LINC00342	long intergenic non-protein coding RNA 342	-0.396	0.000603
A_23_P18317		SLC41A3	solute carrier family 41 member 3	0.146	0.000608
A_23_P307310		ACAN	aggrecan	-0.4	0.00061
A_24_P100351		GNL3L	guanine nucleotide binding protein-like 3 (nucleolar)-like	-0.158	0.000611
A_24_P481783		UBAP1L	ubiquitin associated protein 1 like	-0.513	0.000612
A_19_P00316284		MIR143HG	cardiac mesoderm enhancer-associated non-coding RNA	-0.496	0.000615
A_21_P0000697		LOC100505912	uncharacterized LOC100505912	-0.347	0.000622
A_33_P3261246		RPL37	ribosomal protein L37	-0.204	0.000625
A_33_P3337719		LOC100134868	uncharacterized LOC100134868	-0.513	0.00063
A_24_P236091		ENO2	enolase 2 (gamma, neuronal)	0.315	0.000632
A_33_P3387796	D	PHLDB1	pleckstrin homology-like domain, family B, member 1	-0.189	0.000634
A_24_P781757		LOC148413	uncharacterized LOC148413	-0.245	0.000634
A_33_P3224483		RABL2B	RAB, member of RAS oncogene family-like 2B	-0.459	0.000648
A_33_P3244347		PC	pyruvate carboxylase	-0.139	0.000652
A_33_P3738458		TNS1	tensin 1	-0.219	0.000653
A_23_P39616		ORC2	origin recognition complex subunit 2	-0.399	0.000662
A_33_P3397801		LOC642484	uncharacterized LOC642484	-0.397	0.000663
A_32_P41375		LINC01000	long intergenic non-protein coding RNA 1000	-0.598	0.000664
A_21_P0005092		LINC01615	long intergenic non-protein coding RNA 1615	0.362	0.000668
A_19_P00320119	D	TUG1	taurine up-regulated 1 (non-protein coding)	-0.224	0.000671
A_23_P13998		GOLGA2P5	golgin A2 pseudogene 5	-0.164	0.000672
A_33_P3293573		VPS37D	vacuolar protein sorting 37 homolog D (S. cerevisiae)	0.14	0.000677
A_21_P0014465	D	LOC101928173	uncharacterized LOC101928173	0.213	0.000678
A_19_P00315601				-0.292	0.000691
A_23_P99614		BTBD6	BTB (POZ) domain containing 6	-0.132	0.000695
A_33_P3423700		LOC100131829	uncharacterized LOC100131829	-0.342	0.000702
A_33_P3330353	D	MOSPD1	motile sperm domain containing 1	0.187	0.000713
A_33_P3214129				-0.457	0.000715
A_33_P3280993	D	HCG18	HLA complex group 18 (non-protein coding)	-0.272	0.000732
A_33_P3252206		LEPROTL1	leptin receptor overlapping transcript-like 1	-0.194	0.000741
A_23_P77103		SORD	sorbitol dehydrogenase	-0.174	0.000763
A_23_P128783		EAPP	E2F-associated phosphoprotein	0.133	0.000767
A_33_P3522511				-0.336	0.00077
A_23_P258221		ABCC5	ATP binding cassette subfamily C member 5	-0.259	0.000785
A_23_P112159		AGO2	argonaute 2, RISC catalytic component	-0.182	0.000789
A_24_P255218		MYO5A	myosin VA	-0.29	0.000793
A_33_P3379726		CCDC106	coiled-coil domain containing 106	-0.191	0.0008
A_24_P117323		KLHL22	kelch like family member 22	-0.231	0.000805
A_24_P237757		ZMYM2	zinc finger, MYM-type 2	-0.357	0.000807
A_24_P247978		ZNF589	zinc finger protein 589	-0.265	0.000822
A_32_P215179	D	NPIPA8 (includes others)	nuclear pore complex interacting protein family member A1	-0.336	0.000828
A_23_P70359		AGPAT4-IT1	AGPAT4 intronic transcript 1	-0.298	0.000841
A_33_P3360555		ZNF444	zinc finger protein 444	-0.276	0.000842
A_24_P932016		HUWE1	HECT, UBA and WWE domain containing 1, E3 ubiquitin protein ligase	-0.217	0.000852
A_33_P3410251		UNC80	unc-80 homolog, NALCN activator	-0.272	0.000855
A_21_P0010794	D	FAM157C	family with sequence similarity 157 member C	-0.284	0.000856
A_33_P3334292		PPIAL4G (includes others)	peptidylprolyl isomerase A like 4G	-0.548	0.000865
A_21_P0013877				-0.158	0.00087
A_21_P0000655		LOC100129917	uncharacterized LOC100129917	-0.34	0.000876
A_33_P3372526		MDH1B	malate dehydrogenase 1B	-0.269	0.000882
A_33_P3406706		EXOG	endo/exonuclease (5'-3'), endonuclease G-like	-0.209	0.000894
A_24_P16610		ZNRF1	zinc and ring finger 1, E3 ubiquitin protein ligase	-0.191	0.000906
A_33_P3345743		PFN1P2	profilin 1 pseudogene 2	-0.489	0.000942
A_33_P3233000				-0.32	0.00095
A_23_P68072		WDR54	WD repeat domain 54	0.177	0.000953
A_23_P376599		RALBP1	ralA binding protein 1	0.143	0.00096
A_33_P3342807				-0.355	0.000978
A_23_P90143		RPL13A	ribosomal protein L13a	-0.156	0.000983
A_33_P3395403	D	LOC100996724	phosphodiesterase 4D interacting protein-like	-0.21	0.000986
A_23_P92602		ABCA11P	ATP binding cassette subfamily A member 11, pseudogene	-0.275	0.000989
A_23_P69521		CCNI	cyclin I	-0.132	0.000997
A_24_P278192		AK1	adenylate kinase 1	-0.235	0.001
A_33_P3421200	D	FAM86B3P	family with sequence similarity 86, member A pseudogene	-0.33	0.00101
A_23_P206760		HP	haptoglobin	-0.211	0.00101
A_21_P0000116		MID1	midline 1	-0.441	0.00102
A_32_P167471		CLMN	calmin (calponin-like, transmembrane)	-0.252	0.00104
A_23_P13772		TBX3	T-box 3	-0.194	0.00104
A_33_P3274528		C9orf153	chromosome 9 open reading frame 153	-0.362	0.00105
A_24_P615822		BMS1	BMS1, ribosome biogenesis factor	-0.265	0.00106
A_33_P3767773		UBR4	ubiquitin protein ligase E3 component n-recognin 4	-0.184	0.00106
A_19_P00315963	D	ZNF805	zinc finger protein 805	-0.218	0.00106
A_21_P0013977		PCID2	PCI domain containing 2	-0.429	0.00107
A_21_P0006000				0.49	0.00108
A_21_P0011370		GOLGA8A/GOLGA8B	golgin A8 family member A	-0.403	0.00108
A_19_P00812044	D	MAVS	mitochondrial antiviral signaling protein	-0.24	0.00108
A_33_P3395274		ZADH2	zinc binding alcohol dehydrogenase domain containing 2	-0.167	0.00108
A_33_P3234667		ZKSCAN1	zinc finger with KRAB and SCAN domains 1	-0.184	0.00108
A_21_P0010877	D	BMS1P5	BMS1, ribosome biogenesis factor pseudogene 5	-0.255	0.00109
A_33_P3311403		MRVI1	murine retrovirus integration site 1 homolog	-0.131	0.00109
A_33_P3383696		SPEG	SPEG complex locus	-0.292	0.0011
A_33_P3708364		LOC644285	uncharacterized LOC644285	-0.175	0.00111
A_24_P341089	D	ANKRD36BP2	ankyrin repeat domain 36B pseudogene 2	-0.163	0.00114
A_33_P3323041		KANK1	KN motif and ankyrin repeat domains 1	-0.392	0.00115
A_33_P3340254		KMT2D	lysine (K)-specific methyltransferase 2D	-0.231	0.00115
A_32_P170444		SUB1	SUB1 homolog, transcriptional regulator	0.171	0.00117
A_33_P3211834	D	SIRPB1	signal-regulatory protein beta 1	-0.652	0.00118
A_33_P3299865		HIST1H4K	histone cluster 1, H4k	0.142	0.00119
A_24_P933492		ZDHHC21	zinc finger, DHHC-type containing 21	-0.221	0.00119
A_23_P316472		DNHD1	dynein heavy chain domain 1	-0.335	0.0012
A_21_P0010982	D	MALAT1	metastasis associated lung adenocarcinoma transcript 1 (non-protein coding)	-0.174	0.00121
A_19_P00319404		LINC00472	long intergenic non-protein coding RNA 472	-0.281	0.00122
A_33_P3395369		AMD1	adenosylmethionine decarboxylase 1	-0.211	0.00123
A_24_P231057		BOD1L1	biorientation of chromosomes in cell division 1 like 1	-0.257	0.00125
A_33_P3395738		BCAR1	breast cancer anti-estrogen resistance 1	-0.374	0.00125
A_24_P38276		FZD1	frizzled class receptor 1	0.185	0.00126
A_19_P00812349	D	ZNF805	zinc finger protein 805	-0.193	0.00127
A_21_P0014261		LOC102723539	uncharacterized LOC102723539	-0.326	0.00128
A_21_P0011468	D	HERC2	HECT and RLD domain containing E3 ubiquitin protein ligase 2	-0.264	0.0013
A_23_P218131		INF2	inverted formin, FH2 and WH2 domain containing	-0.193	0.00132
A_23_P48099		NUP37	nucleoporin 37kDa	0.155	0.00132
A_23_P71316		RBPMS	RNA binding protein with multiple splicing	0.187	0.00134
A_33_P3420035		ZNF445	zinc finger protein 445	-0.217	0.00134
A_23_P157196		RPS2P32	ribosomal protein S2 pseudogene 32	-0.148	0.00135
A_33_P3813684		FLJ31662	uncharacterized LOC440594	-0.268	0.00135
A_21_P0011742		LINC00665	long intergenic non-protein coding RNA 665	-0.225	0.00136
A_21_P0000494		SNORA16B	small nucleolar RNA, H/ACA box 16B	0.243	0.00136
A_23_P323166	D	SRRM2	serine/arginine repetitive matrix 2	-0.197	0.00136
A_24_P194886		EHBP1	EH domain binding protein 1	-0.202	0.00137
A_24_P5305	D	SPG7	spastic paraplegia 7 (pure and complicated autosomal recessive)	-0.233	0.00137
A_21_P0009768				-0.245	0.00139
A_23_P6099		PLCB1	phospholipase C beta 1	-0.262	0.0014
A_23_P154938		HIRA	histone cell cycle regulator	-0.339	0.00142
A_24_P276816		RCOR3	REST corepressor 3	0.174	0.00142
A_33_P3262181		APOBEC3F	apolipoprotein B mRNA editing enzyme, catalytic polypeptide-like 3F	0.226	0.00144
A_24_P168574		GNAS	GNAS complex locus	-0.26	0.00146
A_23_P366328		VPS37A	vacuolar protein sorting 37 homolog A (S. cerevisiae)	0.116	0.00146
A_33_P3356525				-0.421	0.00147
A_33_P3399028		TLK2	tousled like kinase 2	-0.251	0.00147
A_19_P00321266		LINC00630	long intergenic non-protein coding RNA 630	-0.251	0.00148
A_21_P0005552				-0.217	0.00148
A_33_P3289406		LOC91450	uncharacterized LOC91450	-0.325	0.0015
A_32_P230196	D	AGAP6 (includes others)	ArfGAP with GTPase domain, ankyrin repeat and PH domain 5	-0.357	0.00151
A_24_P298174		CBX1	chromobox 1	-0.177	0.00151
A_23_P126291	D	SNRPE	small nuclear ribonucleoprotein polypeptide E	0.18	0.00151
A_33_P3313929		CCR6	chemokine (C-C motif) receptor 6	-0.415	0.00152
A_33_P3591972		GLYCTK	glycerate kinase	-0.319	0.00152
A_19_P00318533		HOOK3	hook microtubule-tethering protein 3	-0.151	0.00156
A_33_P3369567		LSP1	lymphocyte-specific protein 1	-0.24	0.00156
A_32_P190461		LOC101926918	uncharacterized LOC101926918	-0.413	0.00156
A_33_P3383371				-0.211	0.00158
A_24_P388252		PPP3R1	protein phosphatase 3 regulatory subunit B, alpha	0.264	0.00159
A_19_P00320721		MDM4	MDM4, p53 regulator	-0.292	0.0016
A_23_P40866		ZBTB20	zinc finger and BTB domain containing 20	-0.323	0.00162
A_33_P3333777		GABPB1-AS1	GABPB1 antisense RNA 1	-0.512	0.00163
A_23_P24555	D	PHLDB1	pleckstrin homology-like domain, family B, member 1	-0.162	0.00163
A_23_P362893		TEAD1	TEA domain transcription factor 1	-0.122	0.00164
A_23_P138435		ZMIZ1	zinc finger, MIZ-type containing 1	-0.153	0.00165
A_33_P3410781	D	CCZ1/CCZ1B	CCZ1 homolog, vacuolar protein trafficking and biogenesis associated	-0.387	0.00166
A_33_P3390107		RNA18S5	RNA, 18S ribosomal 5	-0.522	0.00166
A_23_P209625		CYP1B1	cytochrome P450 family 1 subfamily B member 1	-0.323	0.00169
A_33_P3289251				-0.294	0.0017
A_33_P3285277		CACNB2	calcium channel, voltage-dependent, beta 2 subunit	-0.286	0.0017
A_21_P0012461		RPL32P3	ribosomal protein L32 pseudogene 3	-0.402	0.0017
A_33_P3324137				-0.424	0.00171
A_23_P251505	D	NSUN5	NOP2/Sun RNA methyltransferase family member 5	-0.238	0.00172
A_33_P3265104		PITRM1	pitrilysin metallopeptidase 1	-0.178	0.00172
A_21_P0012473		VEZF1	vascular endothelial zinc finger 1	-0.192	0.00173
A_21_P0012300				-0.356	0.00175
A_33_P3327956		ZNF605	zinc finger protein 605	-0.198	0.00175
A_23_P13914		DHX37	DEAH-box helicase 37	-0.214	0.00176
A_23_P48029		CLEC4A	C-type lectin domain family 4 member A	-0.28	0.00177
A_21_P0011401		LOC100996255	uncharacterized LOC100996255	-0.309	0.00179
A_24_P944444		MAPKBP1	mitogen-activated protein kinase binding protein 1	-0.258	0.00184
A_23_P41114		CSTA	cystatin A	0.206	0.00185
A_24_P945000		SKA2	spindle and kinetochore associated complex subunit 2	0.258	0.00185
A_23_P43095		ZFHX4	zinc finger homeobox 4	-0.196	0.00185
A_33_P3348362	D	ARHGAP5-AS1	ARHGAP5 antisense RNA 1 (head to head)	0.233	0.00187
A_33_P3214239		GNAS-AS1	GNAS antisense RNA 1	-0.328	0.00187
A_21_P0011381	D	GOLGA6L9 (includes others)	golgin A6 family-like 9	-0.377	0.00187
A_33_P3410409		LAMP2	lysosomal associated membrane protein 2	0.134	0.00189
A_33_P3400324		PHC3	polyhomeotic homolog 3 (Drosophila)	-0.168	0.00189
A_33_P3353343	D	SRRM2	serine/arginine repetitive matrix 2	-0.265	0.00189
A_24_P184388		LRTOMT	leucine rich transmembrane and O-methyltransferase domain containing	0.155	0.00192
A_23_P99853		FAM214A	family with sequence similarity 214 member A	-0.159	0.00195
A_32_P54553		USP41	ubiquitin specific peptidase 41	-0.271	0.00195
A_32_P15799	D	HMGN2	high mobility group nucleosomal binding domain 2	0.152	0.00196
A_23_P41143		APEH	acylaminoacyl-peptide hydrolase	-0.168	0.00197
A_21_P0010044				-0.509	0.00198
A_33_P3677020		IL21R-AS1	IL21R antisense RNA 1	-0.254	0.00198
A_23_P101960		ZFP36L2	ZFP36 ring finger protein-like 2	0.161	0.00198
A_33_P3620246		LOC441728	golgin-like	-0.302	0.00201
A_23_P207742	D	THRA	thyroid hormone receptor, alpha	0.149	0.00201
A_33_P3494748		TMEM65	transmembrane protein 65	0.476	0.00201
A_33_P3230738				-0.157	0.00202
A_33_P3440636		LOC286071	uncharacterized LOC286071	-0.239	0.00203
A_23_P163455		MAP1A	microtubule associated protein 1A	-0.189	0.00204
A_23_P358195	D	GOLGA6L9 (includes others)	golgin A6 family-like 9	-0.431	0.00206
A_23_P117782		LARP6	La ribonucleoprotein domain family member 6	-0.141	0.00206
A_24_P388703		LOC439933	uncharacterized LOC439933	-0.282	0.00208
A_23_P123563		RPS6	ribosomal protein S6	-0.131	0.00209
A_21_P0012940				-0.163	0.00211
A_23_P257593		BORCS5	BLOC-1 related complex subunit 5	0.223	0.00212
A_21_P0001902	D	LOC101928173	uncharacterized LOC101928173	0.185	0.00212
A_23_P127068		SEMA4G	semaphorin 4G	-0.3	0.00213
A_21_P0000715		UNK	unkempt family zinc finger	-0.179	0.00213
A_21_P0011939				-0.37	0.00214
A_33_P3255755		CROCCP2	ciliary rootlet coiled-coil, rootletin pseudogene 2	-0.366	0.00214
A_21_P0011501	D	FAM157C	family with sequence similarity 157 member C	-0.326	0.00215
A_21_P0012079	D	MIR4435-2HG	MIR4435-2 host gene	0.212	0.00215
A_24_P160413		MTMR9LP	myotubularin related protein 9-like, pseudogene	-0.388	0.00216
A_23_P253158		EP400	E1A binding protein p400	-0.241	0.00218
A_21_P0007530				-0.267	0.00219
A_33_P3277110		SLC5A3	solute carrier family 5 (sodium/myo-inositol cotransporter), member 3	-0.189	0.0022
A_21_P0011386		UBE2Q2L	ubiquitin conjugating enzyme E2Q family member 2-like	-0.257	0.0022
A_23_P53541		CHD4	chromodomain helicase DNA binding protein 4	-0.193	0.00221
A_21_P0000369		SNORA16A	small nucleolar RNA, H/ACA box 16A	0.235	0.00222
A_24_P58894				-0.226	0.00224
A_24_P49383		AAMDC	adipogenesis associated, Mth938 domain containing	0.127	0.00224
A_33_P3308481		HYMAI	hydatidiform mole associated and imprinted (non-protein coding)	-0.278	0.00224
A_19_P00322228				-0.216	0.00225
A_33_P3357322		SMC2	structural maintenance of chromosomes 2	0.177	0.00225
A_24_P940310		URB1	URB1 ribosome biogenesis 1 homolog (S. cerevisiae)	-0.281	0.00227
A_33_P3304748				-0.311	0.0023
A_23_P160992		FMO4	flavin containing monooxygenase 4	0.228	0.00232
A_23_P204079		NPFF	neuropeptide FF-amide peptide precursor	-0.371	0.00232
A_33_P3334162				-0.211	0.00233
A_33_P3321781	D	SRSF1	serine/arginine-rich splicing factor 1	-0.407	0.00233
A_33_P3378654				-0.241	0.00234
A_33_P3401841		CTDP1	CTD phosphatase subunit 1	-0.263	0.00234
A_32_P30649		ETV5	ets variant 5	0.209	0.00235
A_32_P170749		STAG3	stromal antigen 3	-0.434	0.00237
A_23_P86550		EIF3A	eukaryotic translation initiation factor 3 subunit A	-0.154	0.00238
A_24_P101561				-0.166	0.00239
A_33_P3305458		ATF6B	activating transcription factor 6 beta	0.396	0.00239
A_24_P273143		LINC00152	long intergenic non-protein coding RNA 152	0.232	0.0024
A_21_P0013729		FRG1JP	FSHD region gene 1 family member J, pseudogene	0.149	0.0024
A_33_P3215277		TTBK2	tau tubulin kinase 2	-0.187	0.0024
A_32_P221958	D	AGAP6 (includes others)	ArfGAP with GTPase domain, ankyrin repeat and PH domain 5	-0.316	0.00241
A_33_P3646133		NFATC2IP	nuclear factor of activated T-cells, cytoplasmic, calcineurin-dependent 2 interacting protein	-0.245	0.00241
A_23_P312851		PMEL	premelanosome protein	0.236	0.00242
A_21_P0014801	D	KLHDC4	kelch domain containing 4	-0.289	0.00244
A_23_P106844		MT2A	metallothionein 2A	-0.121	0.00244
A_21_P0009155	D	SRSF1	serine/arginine-rich splicing factor 1	-0.374	0.00244
A_21_P0011373	D	RAD51-AS1	RAD51 antisense RNA 1 (head to head)	-0.367	0.00245
A_23_P142969		ZNF2	zinc finger protein 2	0.23	0.00245
A_24_P136094		CCDC88C	coiled-coil domain containing 88C	-0.209	0.00246
A_33_P3358253		INPPL1	inositol polyphosphate phosphatase like 1	-0.19	0.00246
A_23_P300484		OBSL1	obscurin-like 1	-0.19	0.00247
A_24_P201064		PPP1R3B	protein phosphatase 1 regulatory subunit 3B	0.182	0.00247
A_24_P142024		CHMP4A	charged multivesicular body protein 4A	0.127	0.0025
A_24_P34545		ING5	inhibitor of growth family member 5	-0.185	0.00251
A_33_P3323722		ARL4C	ADP ribosylation factor like GTPase 4C	0.261	0.00253
A_33_P3230688		CDK10	cyclin-dependent kinase 10	-0.301	0.00254
A_33_P3263538	D	NEAT1	nuclear paraspeckle assembly transcript 1 (non-protein coding)	-0.943	0.00255
A_23_P341275		POP1	POP1 homolog, ribonuclease P/MRP subunit	-0.194	0.00255
A_21_P0000501		SNORD97	small nucleolar RNA, C/D box 97	0.271	0.00257
A_23_P345220	D	SH3PXD2A	SH3 and PX domains 2A	-0.198	0.00257
A_33_P3373560		SPTAN1	spectrin alpha, non-erythrocytic 1	-0.158	0.00258
A_24_P167683		ITPK1	inositol-tetrakisphosphate 1-kinase	0.202	0.0026
A_23_P396353		NIN	ninein	0.143	0.0026
A_33_P3249773		TATDN3	TatD DNase domain containing 3	0.13	0.0026
A_21_P0010263				-0.258	0.00261
A_21_P0000386		SNORD89	small nucleolar RNA, C/D box 89	0.229	0.00262
A_23_P3532		LITAF	lipopolysaccharide-induced TNF factor	0.194	0.00262
A_33_P3326733		GOLGA2P6	golgin A2 pseudogene 6	-0.371	0.00265
A_24_P235783		SF1	splicing factor 1	-0.394	0.00266
A_19_P00803086				-0.186	0.00269
A_21_P0001545				0.181	0.00269
A_21_P0014949	D	NPEPPS	aminopeptidase puromycin sensitive	-0.247	0.0027
A_33_P3273000		PTK2B	protein tyrosine kinase 2 beta	-0.467	0.0027
A_23_P341065		SELO	selenoprotein O	-0.189	0.0027
A_21_P0000500		SNORD86	small nucleolar RNA, C/D box 86	-0.209	0.00271
A_33_P3378384		DNM1P46	dynamin 1 pseudogene 46	-0.253	0.00272
A_24_P15502				0.143	0.00274
A_21_P0011910	D	CHORDC1	cysteine and histidine rich domain containing 1	-0.202	0.00278
A_23_P142872		TCF7L1	transcription factor 7-like 1 (T-cell specific, HMG-box)	-0.252	0.00279
A_24_P306720		FOXN3-AS1	FOXN3 antisense RNA 1	0.169	0.00281
A_33_P3422330		KLHL17	kelch like family member 17	-0.286	0.00284
A_33_P3348887	D	PBX3	pre-B-cell leukemia homeobox 3	-0.248	0.00287
A_33_P3323298		JUN	jun proto-oncogene	0.152	0.00289
A_23_P351320		CDC40	cell division cycle 40	-0.219	0.00292
A_23_P142574		MOGAT1	monoacylglycerol O-acyltransferase 1	-0.46	0.00292
A_24_P159312		SLC7A6	solute carrier family 7 (amino acid transporter light chain, y+L system), member 6	-0.247	0.00292
A_33_P3234939		ZNF266	zinc finger protein 266	-0.266	0.00292
A_32_P22338		PDCD6IP	programmed cell death 6 interacting protein	-0.171	0.00293
A_33_P3802558				-0.306	0.00294
A_33_P3254013	D	GAK	cyclin G associated kinase	-0.451	0.00295
A_21_P0011382	D	UBE2Q2P1	ubiquitin conjugating enzyme E2Q family member 2 pseudogene 1	-0.328	0.00295
A_33_P3338335		MIDN	midnolin	0.133	0.00296
A_23_P371129		SLX4	SLX4 structure-specific endonuclease subunit	-0.14	0.00296
A_24_P306561		TCF25	transcription factor 25 (basic helix-loop-helix)	-0.143	0.00297
A_32_P114215		COMMD6	COMM domain containing 6	0.122	0.00298
A_33_P3360382		MEG8	maternally expressed 8 (non-protein coding)	-0.298	0.003
A_33_P3762918	D	LINC01004	long intergenic non-protein coding RNA 1004	-0.329	0.00301
A_23_P376686		BTNL2	butyrophilin like 2	-0.226	0.00301
A_33_P3884179	D	LINC00342	long intergenic non-protein coding RNA 342	-0.389	0.00302
A_23_P25746	D	ARHGAP5-AS1	ARHGAP5 antisense RNA 1 (head to head)	0.244	0.00302
A_23_P393401	D	PDXDC2P	pyridoxal-dependent decarboxylase domain containing 2, pseudogene	-0.631	0.00304
A_33_P3310533		DNAJC21	DnaJ heat shock protein family (Hsp40) member C21	-0.15	0.00305
A_23_P105833		BIVM	basic, immunoglobulin-like variable motif containing	-0.118	0.00306
A_21_P0010879	D	BMS1P5	BMS1, ribosome biogenesis factor pseudogene 5	-0.26	0.00308
A_33_P3351982		COA5	cytochrome c oxidase assembly factor 5	0.136	0.00308
A_23_P65068		EID3	EP300 interacting inhibitor of differentiation 3	-0.186	0.00308
A_33_P3377519		HOXA6	homeobox A6	-0.472	0.00308
A_24_P11965		MRFAP1	Morf4 family associated protein 1	-0.143	0.00308
A_33_P3444555				0.17	0.00309
A_33_P3267186		ATP2B1	ATPase, Ca++ transporting, plasma membrane 1	-0.16	0.00309
A_33_P3351664		CCDC57	coiled-coil domain containing 57	-0.206	0.00309
A_21_P0014604	D	LOC100996763/NOTCH2NL	notch 2 N-terminal like	-0.263	0.00309
A_33_P3212679	D	SNRPG	small nuclear ribonucleoprotein polypeptide G	0.152	0.0031
A_23_P63209		HSD11B1	hydroxysteroid (11-beta) dehydrogenase 1	0.247	0.00311
A_33_P3224157		STRADA	STE20-related kinase adaptor alpha	0.213	0.00314
A_23_P355289		AFG3L1P	AFG3-like AAA ATPase 1, pseudogene	-0.435	0.00315
A_24_P944827		ATG7	autophagy related 7	-0.17	0.00316
A_23_P342138		ADAMTSL1	ADAMTS like 1	-0.172	0.00318
A_23_P371885		ARL17A/ARL17B	ADP ribosylation factor like GTPase 17A	-0.326	0.00318
A_23_P99762		RBM25	RNA binding motif protein 25	-0.154	0.00318
A_23_P19517		ITPR3	inositol 1,4,5-trisphosphate receptor, type 3	-0.287	0.0032
A_33_P3420466		MATN3	matrilin 3	0.236	0.0032
A_21_P0011021		TSSC2	tumor suppressing subtransferable candidate 2 pseudogene	-0.48	0.0032
A_23_P82412	D	NSUN5	NOP2/Sun RNA methyltransferase family member 5	-0.286	0.00321
A_33_P3342106		ZHX3	zinc fingers and homeoboxes 3	-0.172	0.00321
A_23_P380928	D	ARPC4-TTLL3	ARPC4-TTLL3 readthrough	-0.289	0.00322
A_33_P3239101	D	GOLGA6L9 (includes others)	golgin A6 family-like 9	-0.402	0.00322
A_23_P6344		SDF2L1	stromal cell-derived factor 2-like 1	0.135	0.00323
A_19_P00315843	D	SCARNA16	small Cajal body-specific RNA 16	-0.414	0.00324
A_23_P6546		TUBGCP6	tubulin gamma complex associated protein 6	-0.226	0.00325
A_33_P3284453		SOGA3	SOGA family member 3	-0.285	0.00327
A_33_P3347417		SPEN	spen family transcriptional repressor	-0.226	0.00328
A_21_P0013250		PMS2P10	PMS1 homolog 2, mismatch repair system component pseudogene 10	-0.331	0.0033
A_33_P3246318		RBX1	ring-box 1, E3 ubiquitin protein ligase	0.145	0.00332
A_33_P3274560		SLC19A3	solute carrier family 19 (thiamine transporter), member 3	-0.395	0.00332
A_23_P65930		ZFYVE19	zinc finger, FYVE domain containing 19	-0.158	0.00332
A_23_P81770		PTP4A1	protein tyrosine phosphatase type IVA, member 1	0.144	0.00333
A_23_P259413		CDV3	CDV3 homolog (mouse)	0.128	0.00334
A_24_P285480		MRPL33	mitochondrial ribosomal protein L33	0.148	0.00335
A_23_P83498		IGF2BP1	insulin like growth factor 2 mRNA binding protein 1	-0.235	0.00338
A_21_P0012235				-0.248	0.00341
A_23_P21495		FCGBP	Fc fragment of IgG binding protein	-0.218	0.00341
A_21_P0007936				-0.35	0.00342
A_19_P00319151	D	XIST	X inactive specific transcript (non-protein coding)	-0.306	0.00347
A_23_P135061		CORO2A	coronin 2A	0.441	0.00348
A_24_P410516	D	GOLGA6L9 (includes others)	golgin A6 family-like 9	-0.358	0.00349
A_33_P3240941	D	BACE1	beta-site APP-cleaving enzyme 1	-0.155	0.00352
A_33_P3216427		DGKQ	diacylglycerol kinase theta	-0.241	0.00353
A_33_P3628409		PKI55	DKFZp434H1419	-0.231	0.00353
A_23_P64990		RAD52	RAD52 homolog, DNA repair protein	-0.153	0.00353
A_33_P3329477		RPL13P5	ribosomal protein L13 pseudogene 5	-0.174	0.00353
A_21_P0012537				-0.175	0.00356
A_33_P3290296		BBIP1	BBSome interacting protein 1	-0.224	0.00356
A_33_P3319041		HMGB3	high mobility group box 3	0.229	0.00356
A_23_P170978		ZNF692	zinc finger protein 692	-0.301	0.00358
A_33_P3399101		CTSL	cathepsin L	-0.335	0.0036
A_33_P3318368		DOK7	docking protein 7	-0.326	0.0036
A_24_P419309		SNRNP40	small nuclear ribonucleoprotein, U5 40kDa subunit	0.164	0.00362
A_21_P0014584				-0.484	0.00363
A_24_P183094		ATP13A3	ATPase type 13A3	0.13	0.00363
A_21_P0011619		TBC1D3P5	TBC1 domain family member 3 pseudogene 5	-0.443	0.00363
A_19_P00320343		LOC100507403	uncharacterized LOC100507403	0.296	0.00365
A_23_P376627		D2HGDH	D-2-hydroxyglutarate dehydrogenase	-0.279	0.00366
A_21_P0011931		KMT2C	lysine (K)-specific methyltransferase 2C	-0.228	0.00367
A_32_P14843	D	NPIPB15 (includes others)	nuclear pore complex interacting protein family member B15	-0.286	0.00368
A_33_P3309481		PTPRVP	protein tyrosine phosphatase, receptor type V, pseudogene	-0.253	0.00368
A_33_P3421923		CADM3	cell adhesion molecule 3	0.226	0.00369
A_21_P0014028				-0.462	0.0037
A_33_P3361746		TRPS1	trichorhinophalangeal syndrome I	0.195	0.0037
A_33_P3419835		FBXL19-AS1	FBXL19 antisense RNA 1 (head to head)	-0.186	0.00372
A_21_P0000463		SNORD105B	small nucleolar RNA, C/D box 105B	0.227	0.00373
A_23_P388146		ZNF417/ZNF587	zinc finger protein 417	-0.244	0.00374
A_21_P0003290				-0.198	0.00376
A_32_P184796		RPLP0	ribosomal protein, large, P0	-0.163	0.00379
A_23_P501547		ADCY6	adenylate cyclase 6	-0.177	0.00381
A_24_P314554		GOLGA2P2Y	golgin A2 pseudogene 2, Y-linked	-0.303	0.00382
A_24_P314597		KIAA0319L	KIAA0319-like	-0.346	0.00382
A_23_P11664	D	SRSF11	serine/arginine-rich splicing factor 11	-0.219	0.00383
A_23_P303317		ZXDC	ZXD family zinc finger C	-0.23	0.00383
A_33_P3408762	D	LMNA	lamin A/C	-0.184	0.00384
A_24_P382630		MTG2	mitochondrial ribosome-associated GTPase 2	-0.17	0.00384
A_33_P3389178		RAPGEF3	Rap guanine nucleotide exchange factor 3	-0.161	0.00385
A_23_P252748		ZNF195	zinc finger protein 195	-0.141	0.00385
A_33_P3340639		GPAM	glycerol-3-phosphate acyltransferase, mitochondrial	-0.425	0.00386
A_23_P339954	D	NPIPB15 (includes others)	nuclear pore complex interacting protein family member B15	-0.322	0.00387
A_33_P3521643		PPP1R12C	protein phosphatase 1 regulatory subunit 12C	-0.202	0.00387
A_19_P00323413	D	PTPN14	protein tyrosine phosphatase, non-receptor type 14	-0.156	0.00387
A_33_P3407529		PRRT4	proline-rich transmembrane protein 4	-0.241	0.00388
A_33_P3275310		ATXN3	ataxin 3	0.226	0.00392
A_23_P97892		LDB1	LIM domain binding 1	-0.202	0.00392
A_24_P333571		ARHGAP29	Rho GTPase activating protein 29	-0.328	0.00392
A_33_P3318237		PPP2R5B	protein phosphatase 2 regulatory subunit B', beta	-0.171	0.00394
A_23_P8797		PMS2P2	PMS1 homolog 2, mismatch repair system component pseudogene 2	-0.177	0.00396
A_32_P172848		GK	glycerol kinase	0.389	0.00399
A_21_P0014619		LOC101928953	uncharacterized LOC101928953	-0.248	0.00399
A_23_P411102		DLG4	discs, large homolog 4 (Drosophila)	-0.246	0.00402
A_23_P300076		IQCG	IQ motif containing G	0.202	0.00402
A_21_P0010878	D	BMS1P5	BMS1, ribosome biogenesis factor pseudogene 5	-0.381	0.00403
A_33_P3209895		FAM58A	family with sequence similarity 58 member A	-0.252	0.00405
A_23_P147888		RPLP2	ribosomal protein, large, P2	-0.109	0.00405
A_33_P3303372		PARD3	par-3 family cell polarity regulator	-0.163	0.00408
A_23_P64058		RASGRP2	RAS guanyl releasing protein 2 (calcium and DAG-regulated)	-0.286	0.00413
A_33_P3278911		PHF20L1	PHD finger protein 20-like 1	-0.232	0.00415
A_21_P0006538	D	XIST	X inactive specific transcript (non-protein coding)	-0.334	0.00417
A_23_P7732		CETN3	centrin 3	0.168	0.00419
A_23_P121716		ANXA3	annexin A3	0.249	0.00422
A_23_P208009		SEC11C	SEC11 homolog C, signal peptidase complex subunit	0.115	0.00425
A_23_P369666		ZMYND8	zinc finger, MYND-type containing 8	-0.354	0.00425
A_33_P3219055		C15orf61	chromosome 15 open reading frame 61	0.125	0.00427
A_24_P340776	D	PDXDC2P	pyridoxal-dependent decarboxylase domain containing 2, pseudogene	-0.255	0.00427
A_21_P0012074				-0.421	0.00428
A_33_P3334047				-0.365	0.00431
A_33_P3336484	D	NPIPA8 (includes others)	nuclear pore complex interacting protein family member A1	-0.322	0.00431
A_21_P0007437		LOC101927495	uncharacterized LOC101927495	-0.322	0.00432
A_21_P0010592	D	LOC100288069	uncharacterized LOC100288069	-0.217	0.00435
A_23_P100868		MYO19	myosin XIX	-0.208	0.00436
A_23_P146217		BAG4	BCL2 associated athanogene 4	0.201	0.00438
A_33_P3267745		C9orf69	chromosome 9 open reading frame 69	0.265	0.00438
A_23_P110571		MAST4	microtubule associated serine/threonine kinase family member 4	-0.145	0.00438
A_33_P3352432		KRBOX4	KRAB box domain containing 4	-0.151	0.00441
A_24_P339429		KCNJ12	potassium channel, inwardly rectifying subfamily J, member 12	0.198	0.00445
A_33_P3349840				0.173	0.00446
A_21_P0014700		LOC105372482	uncharacterized LOC105372482	-0.432	0.00447
A_33_P3280549				-0.152	0.00448
A_33_P3238777		LOC729218	uncharacterized LOC729218	-0.298	0.0045
A_33_P3393341		LPIN3	lipin 3	-0.309	0.00451
A_24_P873659	D	MALAT1	metastasis associated lung adenocarcinoma transcript 1 (non-protein coding)	-0.33	0.00453
A_33_P3343503		SAMD4A	sterile alpha motif domain containing 4A	0.23	0.00453
A_23_P210131				-0.255	0.00455
A_23_P406785		C9orf50	chromosome 9 open reading frame 50	-0.233	0.00455
A_21_P0000925		LINC01341	long intergenic non-protein coding RNA 1341	-0.33	0.00456
A_23_P57961		PLXNB1	plexin B1	-0.161	0.00456
A_23_P90845		TIA1	TIA1 cytotoxic granule-associated RNA binding protein	-0.171	0.00457
A_33_P3326312				-0.157	0.00459
A_23_P630	D	MSTO1	misato 1, mitochondrial distribution and morphology regulator	-0.196	0.00459
A_32_P231086	D	GOLGA6L9 (includes others)	golgin A6 family-like 9	-0.262	0.0046
A_24_P322847		POLR3H	polymerase (RNA) III (DNA directed) polypeptide H (22.9kD)	-0.183	0.00462
A_23_P501822		JUP	junction plakoglobin	-0.233	0.00465
A_24_P204214	D	NCOR1	nuclear receptor corepressor 1	-0.138	0.00465
A_33_P3243399		SLMAP	sarcolemma associated protein	-0.263	0.00465
A_33_P3365193	D	AMY1C (includes others)	amylase, alpha 1A (salivary)	-0.372	0.00466
A_23_P259506		CYSTM1	cysteine-rich transmembrane module containing 1	0.146	0.00466
A_32_P194115		SUN2	Sad1 and UNC84 domain containing 2	-0.176	0.00467
A_24_P148235		RPS27	ribosomal protein S27	-0.115	0.00468
A_23_P134953		PLIN2	perilipin 2	0.157	0.00469
A_23_P158880		STARD5	StAR related lipid transfer domain containing 5	0.205	0.00472
A_23_P89812		CNDP2	CNDP dipeptidase 2 (metallopeptidase M20 family)	-0.164	0.00473
A_19_P00810043		LOC401261	uncharacterized LOC401261	-0.383	0.00473
A_24_P230176		CCDC137	coiled-coil domain containing 137	-0.141	0.00474
A_32_P32254		COL6A1	collagen, type VI, alpha 1	-0.178	0.00474
A_33_P3243168		MZF1	myeloid zinc finger 1	-0.27	0.00475
A_23_P81241		NDFIP1	Nedd4 family interacting protein 1	0.099	0.00475
A_23_P57941		RBM6	RNA binding motif protein 6	-0.262	0.00477
A_33_P3833256		LOC440028	uncharacterized LOC440028	0.15	0.00479
A_33_P3391211		RAB12	RAB12, member RAS oncogene family	0.146	0.00481
A_24_P262407	D	THRA	thyroid hormone receptor, alpha	0.147	0.00482
A_21_P0010684				-0.284	0.00483
A_23_P203891		NCOR2	nuclear receptor corepressor 2	-0.187	0.00484
A_33_P3216008		SKA3	spindle and kinetochore associated complex subunit 3	0.236	0.00484
A_33_P3251322		MTMR14	myotubularin related protein 14	-0.277	0.00486
A_33_P3359438		LOC100128325	uncharacterized LOC100128325	0.265	0.00487
A_24_P586390	D	LOC100133331	uncharacterized LOC100133331	-0.375	0.00489
A_21_P0013556				0.134	0.00491
A_23_P164999		CDC34	cell division cycle 34	-0.127	0.00491
A_33_P3420704				-0.24	0.00492
A_33_P3347387				0.179	0.00492
A_33_P3370812		TBC1D1	TBC1 domain family member 1	-0.245	0.00492
A_33_P3372566		ABCC10	ATP binding cassette subfamily C member 10	-0.452	0.00496
A_23_P346048		HERC2P2	hect domain and RLD 2 pseudogene 2	-0.367	0.00496
A_23_P7679		NUP155	nucleoporin 155kDa	0.209	0.00498
A_23_P50455		POLD1	polymerase (DNA directed), delta 1, catalytic subunit	-0.213	0.00498
A_23_P162702	D	HECTD4	HECT domain containing E3 ubiquitin protein ligase 4	-0.197	0.005
A_23_P108761		CNOT11	CCR4-NOT transcription complex subunit 11	-0.122	0.00501
A_32_P109704		SFSWAP	splicing factor, suppressor of white-apricot family	-0.189	0.00504
A_33_P3313660		BRD7P3	bromodomain containing 7 pseudogene 3	-0.279	0.00508
A_33_P3304655		LTBP1	latent transforming growth factor beta binding protein 1	-0.218	0.00514
A_21_P0012454		PTPN11	protein tyrosine phosphatase, non-receptor type 11	-0.217	0.00514
A_21_P0010964		RPS2	ribosomal protein S2	-0.135	0.00517
A_24_P254965		HDAC8	histone deacetylase 8	-0.178	0.0052
A_24_P178631				-0.238	0.00524
A_33_P3330468		RBM41	RNA binding motif protein 41	-0.118	0.00525
A_33_P3248759		WDR24	WD repeat domain 24	-0.144	0.00526
A_19_P00331623	D	XIST	X inactive specific transcript (non-protein coding)	-0.318	0.00526
A_33_P3390521		UBE2Z	ubiquitin conjugating enzyme E2Z	-0.169	0.00527
A_23_P156708	D	TNXB	tenascin XB	-0.582	0.0053
A_24_P179183		ANKRD12	ankyrin repeat domain 12	-0.132	0.00533
A_21_P0002205				-0.283	0.00535
A_21_P0011681				0.142	0.00536
A_23_P67702		ZNF85	zinc finger protein 85	-0.159	0.00537
A_21_P0009037				-0.234	0.0054
A_23_P27724		SEPW1	selenoprotein W, 1	-0.145	0.00542
A_19_P00320090	D	SNHG20	small nucleolar RNA host gene 20	-0.269	0.00544
A_23_P60793		ASMTL-AS1	ASMTL antisense RNA 1	-0.431	0.00544
A_33_P3289192		HBS1L	HBS1 like translational GTPase	0.118	0.00544
A_24_P329795		C10orf10	chromosome 10 open reading frame 10	0.17	0.0055
A_24_P142228		RPL13	ribosomal protein L13	-0.14	0.00552
A_23_P29495		CTNNB1	catenin beta 1	0.149	0.00553
A_21_P0008722				-0.418	0.00554
A_21_P0013251		PMS2	PMS1 homolog 2, mismatch repair system component	-0.203	0.00554
A_23_P16562		SUGP2	SURP and G-patch domain containing 2	-0.247	0.00555
A_24_P153511		OSBPL8	oxysterol binding protein like 8	0.139	0.00556
A_23_P165707		LYG1	lysozyme g1	-0.245	0.00558
A_21_P0000584		VTRNA2-1	vault RNA 2-1	0.247	0.00558
A_24_P74508		SLC25A18	solute carrier family 25 (glutamate carrier), member 18	-0.204	0.0056
A_33_P3373765		DRD4	dopamine receptor D4	-0.39	0.00561
A_23_P35456	D	SH3PXD2A	SH3 and PX domains 2A	-0.228	0.00562
A_23_P203391		ASRGL1	asparaginase like 1	-0.424	0.00563
A_21_P0014324				-0.207	0.00564
A_24_P374634		STAU2	staufen double-stranded RNA binding protein 2	0.218	0.00564
A_21_P0012341		PI4KAP1	phosphatidylinositol 4-kinase, catalytic, alpha pseudogene 1	-0.369	0.00569
A_24_P40907		PLPP6	phospholipid phosphatase 6	0.15	0.00574
A_33_P3474859		LINC00537	long intergenic non-protein coding RNA 537	-0.177	0.00575
A_23_P500333	D	SSBP3	single stranded DNA binding protein 3	0.391	0.00575
A_24_P67946		NUDT4	nudix hydrolase 4	0.16	0.00576
A_23_P214897		AKAP12	A-kinase anchoring protein 12	-0.198	0.00577
A_23_P360874		LRWD1	leucine-rich repeats and WD repeat domain containing 1	-0.155	0.0058
A_23_P41734		RNF130	ring finger protein 130	0.126	0.0058
A_23_P27571		MCOLN1	mucolipin 1	-0.148	0.00581
A_33_P3367392		FAM167B	family with sequence similarity 167 member B	-0.192	0.00582
A_24_P120115	D	CFLAR	CASP8 and FADD like apoptosis regulator	-0.184	0.00588
A_23_P31224		PILRA	paired immunoglobin-like type 2 receptor alpha	-0.376	0.00589
A_33_P3308158				-0.167	0.00592
A_21_P0001296				-0.257	0.00596
A_33_P3214665		MAP2	microtubule associated protein 2	-0.222	0.00596
A_21_P0011376				-0.125	0.00597
A_23_P39185		RDH13	retinol dehydrogenase 13 (all-trans/9-cis)	-0.207	0.00597
A_33_P3383955		DDB2	damage-specific DNA binding protein 2	-0.221	0.00599
A_24_P15043		KLHL18	kelch like family member 18	-0.109	0.00599
A_23_P132027		SPAG4	sperm associated antigen 4	0.294	0.00599
A_33_P3348244		BRI3	brain protein I3	0.144	0.00602
A_33_P3263989				0.2	0.00604
A_33_P3264662		CYP27C1	cytochrome P450 family 27 subfamily C member 1	0.303	0.00606
A_33_P3423941	D	IFITM1	interferon induced transmembrane protein 1	0.261	0.00609
A_33_P3261648	D	ANKRD36B	ankyrin repeat domain 36B	-0.215	0.00611
A_21_P0007429		NCR3LG1	natural killer cell cytotoxicity receptor 3 ligand 1	-0.201	0.00611
A_24_P100368		DYNLT3	dynein, light chain, Tctex-type 3	0.196	0.00612
A_24_P204675	D	NPIPB3 (includes others)	nuclear pore complex interacting protein family, member B3	-0.298	0.00613
A_23_P375281		TRPV1	transient receptor potential cation channel, subfamily V, member 1	-0.29	0.00615
A_24_P944144		DIDO1	death inducer-obliterator 1	-0.315	0.00617
A_23_P15829		TOP3A	topoisomerase (DNA) III alpha	-0.198	0.00617
A_23_P207507		ABCC3	ATP binding cassette subfamily C member 3	-0.202	0.00619
A_23_P106737		LUC7L	LUC7-like	-0.175	0.00621
A_23_P8913		CA2	carbonic anhydrase II	-0.263	0.00622
A_23_P256542		FAM162A	family with sequence similarity 162 member A	0.109	0.00623
A_33_P3211203		LOC101927919	uncharacterized LOC101927919	-0.253	0.00623
A_33_P3883985		LMF1	lipase maturation factor 1	-0.231	0.00625
A_24_P772488		PLXNA4	plexin A4	-0.197	0.00625
A_23_P325438		XPO6	exportin 6	-0.154	0.00627
A_24_P334529		PCDHGA3	protocadherin gamma subfamily A, 3	-0.188	0.00627
A_33_P3308740		RANBP2	RAN binding protein 2	0.186	0.00629
A_24_P219920		FEM1A	fem-1 homolog a (C. elegans)	0.163	0.00631
A_19_P00316919	D	SNHG20	small nucleolar RNA host gene 20	-0.227	0.00632
A_33_P3320152	D	SNRPE	small nuclear ribonucleoprotein polypeptide E	0.17	0.00632
A_33_P3236030		ARHGAP24	Rho GTPase activating protein 24	-0.221	0.00637
A_33_P3234267		LOC100130442	uncharacterized LOC100130442	-0.22	0.00637
A_23_P334751	D	B3GALNT2	beta-1,3-N-acetylgalactosaminyltransferase 2	-0.168	0.00643
A_23_P368740		HDAC10	histone deacetylase 10	-0.511	0.00645
A_21_P0011299				-0.278	0.00646
A_23_P42802		PDIA4	protein disulfide isomerase family A member 4	0.131	0.00646
A_23_P70045		H2AFY	H2A histone family member Y	-0.093	0.00648
A_23_P369701		ABHD17C	abhydrolase domain containing 17C	0.18	0.00649
A_23_P94230		LY96	lymphocyte antigen 96	0.197	0.00649
A_21_P0010949		NUTM2B-AS1	NUTM2B antisense RNA 1	-0.35	0.00649
A_33_P3231878		PIK3C2A	phosphatidylinositol-4-phosphate 3-kinase catalytic subunit type 2 alpha	-0.121	0.00651
A_23_P412427		LOC171391	uncharacterized LOC171391	-0.325	0.00651
A_21_P0000244		SNORD16	small nucleolar RNA, C/D box 16	0.38	0.00652
A_32_P77977		UTP11L	UTP11-like, U3 small nucleolar ribonucleoprotein (yeast)	0.158	0.00652
A_33_P3258782	D	AP1S2	adaptor related protein complex 1 sigma 2 subunit	0.185	0.00657
A_33_P3243878	D	GOLGA6L9 (includes others)	golgin A6 family-like 9	-0.341	0.0066
A_33_P3262020		C8G	complement component 8, gamma polypeptide	-0.192	0.00664
A_33_P3229370		ID4	inhibitor of DNA binding 4, dominant negative helix-loop-helix protein	0.213	0.00664
A_33_P3330991				-0.209	0.00665
A_32_P96807		RC3H1	ring finger and CCCH-type domains 1	-0.146	0.00667
A_23_P141362		FZD2	frizzled class receptor 2	-0.11	0.00668
A_33_P3417820		NOL12	nucleolar protein 12	-0.216	0.00669
A_23_P70201		CHD1	chromodomain helicase DNA binding protein 1	-0.172	0.0067
A_33_P3317406		NDUFV1	NADH:ubiquinone oxidoreductase core subunit V1	-0.168	0.0067
A_21_P0000298		SNORD8	small nucleolar RNA, C/D box 8	0.179	0.00671
A_19_P00802872	D	XIST	X inactive specific transcript (non-protein coding)	-0.277	0.00671
A_23_P60283		XPA	xeroderma pigmentosum, complementation group A	0.116	0.00672
A_23_P215832	D	ATP5J2	ATP synthase, H+ transporting, mitochondrial Fo complex subunit F2	0.122	0.00673
A_23_P414978		NUDT14	nudix hydrolase 14	0.366	0.00673
A_21_P0000351		SCARNA22	small Cajal body-specific RNA 22	-0.192	0.00675
A_21_P0011384	D	UBE2Q2P1	ubiquitin conjugating enzyme E2Q family member 2 pseudogene 1	-0.28	0.00676
A_23_P12173		CRTC2	CREB regulated transcription coactivator 2	-0.136	0.00677
A_24_P231829		BHMT2	betaine--homocysteine S-methyltransferase 2	-0.137	0.00678
A_23_P109254		RBM39	RNA binding motif protein 39	-0.138	0.00678
A_23_P35148		TAF13	TATA-box binding protein associated factor 13	0.2	0.00681
A_33_P3341686	D	XIST	X inactive specific transcript (non-protein coding)	-0.346	0.00681
A_33_P3313596		CDK11A	cyclin-dependent kinase 11A	-0.143	0.00682
A_24_P332739		GUSBP1	glucuronidase, beta pseudogene 1	-0.182	0.00682
A_24_P239076		IGLL1/IGLL5	immunoglobulin lambda-like polypeptide 1	-0.323	0.00682
A_32_P30831	D	RAD51-AS1	RAD51 antisense RNA 1 (head to head)	-0.331	0.00682
A_33_P3841819		THUMPD3-AS1	THUMPD3 antisense RNA 1	-0.289	0.00683
A_23_P217384	D	AP1S2	adaptor related protein complex 1 sigma 2 subunit	0.142	0.00685
A_23_P30805		HIST1H4J	histone cluster 1, H4j	0.14	0.00685
A_33_P3523501		LOC374890	uncharacterized LOC374890	-0.323	0.00686
A_33_P3383611		KCP	kielin/chordin-like protein	-0.335	0.00688
A_23_P110345		CHIC2	cysteine rich hydrophobic domain 2	0.185	0.00689
A_33_P3292812		GPATCH2L	G-patch domain containing 2 like	-0.218	0.0069
A_33_P3326772		LAMTOR4	late endosomal/lysosomal adaptor, MAPK and MTOR activator 4	-0.109	0.0069
A_33_P3311863		AP2A2	adaptor related protein complex 2 alpha 2 subunit	-0.206	0.00691
A_24_P481375		LOC100131564	CCDC18 antisense RNA 1	-0.338	0.00695
A_23_P73835	D	MOSPD1	motile sperm domain containing 1	0.239	0.00695
A_33_P3323999		SBF1	SET binding factor 1	-0.178	0.00695
A_33_P3284686	D	SSBP3	single stranded DNA binding protein 3	0.244	0.00696
A_33_P3276455		KDM5B	lysine (K)-specific demethylase 5B	-0.165	0.00699
A_23_P135239		TLE1	transducin like enhancer of split 1	-0.14	0.00699
A_19_P00322495		TSTD3	thiosulfate sulfurtransferase (rhodanese)-like domain containing 3	-0.228	0.00707
A_33_P3387050		C8orf82	chromosome 8 open reading frame 82	-0.133	0.00708
A_19_P00321183		SLC16A1-AS1	SLC16A1 antisense RNA 1	-0.249	0.00711
A_23_P374902		CLDND2	claudin domain containing 2	0.251	0.00713
A_33_P3266923		LMTK2	lemur tyrosine kinase 2	0.244	0.00714
A_33_P3367481		ARHGAP35	Rho GTPase activating protein 35	-0.147	0.00714
A_23_P217899	D	CCNL2	cyclin L2	-0.347	0.00716
A_21_P0012268		ADRBK2	adrenergic, beta, receptor kinase 2	-0.246	0.00719
A_23_P161190		VIM	vimentin	-0.179	0.00725
A_33_P3348204		FAM218A	family with sequence similarity 218 member A	-0.23	0.00726
A_32_P514599		HSPD1P6	heat shock protein family D (Hsp60) member 1 pseudogene 6	-0.2	0.00727
A_33_P3243622		DCAF8	DDB1 and CUL4 associated factor 8	-0.202	0.00729
A_24_P360206		PCDHA11	protocadherin alpha 11	0.292	0.0073
A_24_P636332		CCDC84	coiled-coil domain containing 84	-0.286	0.00731
A_33_P3230073				-0.112	0.00732
A_21_P0000321		SNORA31	small nucleolar RNA, H/ACA box 31	0.145	0.00736
A_33_P3213134				-0.219	0.00736
A_23_P77502		PKD1	polycystic kidney disease 1 (autosomal dominant)	-0.204	0.00736
A_21_P0011311	D	GOLGA8J (includes others)	golgin A8 family member R	-0.382	0.00742
A_23_P22119		PLEC	plectin	-0.215	0.00742
A_23_P501996		UBE2V1	ubiquitin conjugating enzyme E2 variant 1	0.1	0.00743
A_23_P314760		PRKAG2	protein kinase, AMP-activated, gamma 2 non-catalytic subunit	-0.175	0.00745
A_33_P3294801				-0.456	0.00747
A_21_P0001464		LOC100506022	uncharacterized LOC100506022	0.194	0.00747
A_21_P0000234		SNORD38B	small nucleolar RNA, C/D box 38B	-0.295	0.00749
A_33_P3390576	D	KMT2A	lysine (K)-specific methyltransferase 2A	-0.177	0.00751
A_33_P3232294		ITPR2	inositol 1,4,5-trisphosphate receptor, type 2	-0.229	0.00752
A_33_P3233841		IL6ST	interleukin 6 signal transducer	-0.205	0.00754
A_24_P56270		DYRK2	dual specificity tyrosine-(Y)-phosphorylation regulated kinase 2	0.175	0.00755
A_21_P0012006		LOC101927661	uncharacterized LOC101927661	0.355	0.00755
A_33_P3354796		FLJ42627	uncharacterized LOC645644	-0.194	0.00755
A_33_P3323392		LINC01198	long intergenic non-protein coding RNA 1198	-0.192	0.00756
A_33_P3264238		ZNF280B	zinc finger protein 280B	0.221	0.00756
A_24_P5743		ALDH16A1	aldehyde dehydrogenase 16 family member A1	-0.18	0.00758
A_24_P665504	D	LOC100133331	uncharacterized LOC100133331	-0.453	0.00758
A_23_P143906		MLF1	myeloid leukemia factor 1	0.183	0.0076
A_21_P0004289				-0.281	0.00762
A_32_P103669		GOLGA6A (includes others)	golgin A6 family member C	-0.283	0.00762
A_21_P0002097				-0.259	0.00765
A_21_P0012944	D	SMA4	glucuronidase, beta pseudogene	-0.297	0.00765
A_32_P76853	D	GOLGA8J (includes others)	golgin A8 family member R	-0.284	0.00766
A_33_P3373144		SZT2	seizure threshold 2 homolog (mouse)	-0.331	0.00766
A_24_P2948		RUSC1	RUN and SH3 domain containing 1	-0.113	0.00768
A_23_P169178		TESK1	testis-specific kinase 1	-0.131	0.00769
A_24_P16124		IFITM4P	interferon induced transmembrane protein 4 pseudogene	0.142	0.0077
A_23_P377141		VPS13A	vacuolar protein sorting 13 homolog A (S. cerevisiae)	-0.19	0.00773
A_23_P423197		RXRA	retinoid X receptor alpha	-0.15	0.00774
A_33_P3715177		MEGF8	multiple EGF-like-domains 8	-0.21	0.00775
A_32_P142881	D	SMG1	SMG1 phosphatidylinositol 3-kinase-related kinase	-0.224	0.00778
A_21_P0011948	D	MIR4435-2HG	MIR4435-2 host gene	0.253	0.00779
A_23_P410998		RAB5B	RAB5B, member RAS oncogene family	0.131	0.00781
A_23_P384698		EMC3-AS1	EMC3 antisense RNA 1	-0.206	0.00783
A_23_P6561		EBLN2	endogenous Bornavirus-like nucleoprotein 2	-0.24	0.00785
A_23_P92202		GMPPB	GDP-mannose pyrophosphorylase B	-0.202	0.00785
A_24_P268676		BHLHE40	basic helix-loop-helix family member e40	0.295	0.00789
A_24_P27229		CSAD	cysteine sulfinic acid decarboxylase	-0.395	0.00789
A_33_P3257755				-0.315	0.0079
A_33_P3289780		C14orf2	chromosome 14 open reading frame 2	0.103	0.00792
A_21_P0013269	D	LOC101928451	uncharacterized LOC101928451	-0.205	0.00792
A_23_P386905		UBXN6	UBX domain protein 6	-0.115	0.00793
A_33_P3279629		UCN2	urocortin 2	-0.245	0.00794
A_24_P926760		NKTR	natural killer cell triggering receptor	-0.157	0.00798
A_32_P11230		LINC00999	long intergenic non-protein coding RNA 999	-0.417	0.00801
A_23_P148273	D	MAGT1	magnesium transporter 1	0.179	0.00802
A_33_P3392325		CDC16	cell division cycle 16	-0.1	0.00805
A_24_P365327		LSM14A	LSM14A mRNA processing body assembly factor	0.113	0.00806
A_24_P175187		SAMD9	sterile alpha motif domain containing 9	0.247	0.00808
A_21_P0011358				-0.33	0.00809
A_33_P3338733		MITF	microphthalmia-associated transcription factor	0.117	0.00812
A_33_P3344831		TMEM45A	transmembrane protein 45A	0.128	0.00813
A_33_P3380913				-0.214	0.00815
A_33_P3777165				0.227	0.00815
A_32_P14850	D	NPIPB15 (includes others)	nuclear pore complex interacting protein family member B15	-0.314	0.00821
A_24_P247106		AK3	adenylate kinase 3	-0.143	0.00822
A_23_P37514		C15orf39	chromosome 15 open reading frame 39	-0.135	0.00823
A_33_P3589217		SLC25A6	solute carrier family 25 (mitochondrial carrier; adenine nucleotide translocator), member 6	-0.134	0.00827
A_33_P3225873		LINC01002	long intergenic non-protein coding RNA 1002	-0.221	0.00828
A_21_P0010469		CHKB-AS1	CHKB antisense RNA 1 (head to head)	-0.227	0.0083
A_33_P3368339		NUTM2F/NUTM2G	NUT family member 2G	-0.209	0.0083
A_19_P00317180	D	PVT1	Pvt1 oncogene (non-protein coding)	-0.21	0.0083
A_24_P89701		IMPDH1	IMP (inosine 5'-monophosphate) dehydrogenase 1	-0.161	0.00831
A_23_P257043		GEM	GTP binding protein overexpressed in skeletal muscle	0.151	0.00832
A_32_P119569	D	GOLGA8EP/GOLGA8G	golgin A8 family member G	-0.245	0.00833
A_33_P3406961				-0.192	0.00834
A_33_P3259557	D	TMEM198B	transmembrane protein 198B (pseudogene)	-0.342	0.00834
A_23_P414895		TTC17	tetratricopeptide repeat domain 17	-0.138	0.00837
A_33_P3379061		C9orf47	chromosome 9 open reading frame 47	-0.249	0.00838
A_33_P3398697		PICK1	protein interacting with PRKCA 1	-0.112	0.00838
A_33_P3332865		NPEPL1	aminopeptidase-like 1	-0.162	0.00847
A_33_P3334343	D	HERC2	HECT and RLD domain containing E3 ubiquitin protein ligase 2	-0.206	0.00848
A_32_P191503		LINC00265	long intergenic non-protein coding RNA 265	-0.425	0.00851
A_33_P3276153	D	GOLGA8J (includes others)	golgin A8 family member R	-0.212	0.00858
A_24_P229531		NABP1	nucleic acid binding protein 1	-0.162	0.00859
A_23_P309292	D	HECTD4	HECT domain containing E3 ubiquitin protein ligase 4	-0.196	0.00861
A_19_P00806320		ARPC2	actin related protein 2/3 complex subunit 2	0.128	0.00863
A_21_P0009685		TMEM167A	transmembrane protein 167A	0.113	0.00864
A_21_P0000302		SNORA8	small nucleolar RNA, H/ACA box 8	0.165	0.00865
A_33_P3423270		TMEM40	transmembrane protein 40	-0.27	0.00868
A_19_P00810085		LINC00607	long intergenic non-protein coding RNA 607	-0.216	0.0087
A_21_P0010012				-0.375	0.00875
A_23_P94736		ST6GALNAC4	ST6 (alpha-N-acetyl-neuraminyl-2,3-beta-galactosyl-1,3)-N-acetylgalactosaminide alpha-2,6-sialyltransferase 4	-0.178	0.0088
A_24_P32887		BRD3	bromodomain containing 3	-0.119	0.00881
A_24_P288323		DPP9	dipeptidyl-peptidase 9	-0.185	0.00881
A_33_P3240936	D	BACE1	beta-site APP-cleaving enzyme 1	-0.161	0.00882
A_23_P7099		AGA	aspartylglucosaminidase	0.187	0.00883
A_33_P3299781		DDRGK1	DDRGK domain containing 1	-0.293	0.00886
A_33_P3293346		KCTD3	potassium channel tetramerization domain containing 3	-0.248	0.0089
A_23_P115482		UBE2T	ubiquitin conjugating enzyme E2T	0.147	0.00893
A_33_P3248072	D	SIRPB1	signal-regulatory protein beta 1	-0.177	0.00895
A_23_P97021		AGO3	argonaute 3, RISC catalytic component	-0.138	0.00896
A_21_P0013468	D	FAM86B3P	family with sequence similarity 86, member A pseudogene	-0.301	0.00896
A_33_P3318852		TBC1D8B	TBC1 domain family member 8B	-0.187	0.00898
A_21_P0000481		SNORD79	small nucleolar RNA, C/D box 79	0.232	0.00899
A_23_P155765		HMGB2	high mobility group box 2	0.137	0.00899
A_32_P54018		KIAA1143	KIAA1143	0.154	0.00904
A_33_P3357382		POGZ	pogo transposable element with ZNF domain	-0.355	0.00908
A_21_P0005772				0.379	0.00915
A_21_P0000095		PUDP	pseudouridine 5'-phosphatase	-0.165	0.00917
A_23_P11744		WASH1	WAS protein family homolog 1	-0.211	0.00918
A_23_P117506		DHRS7	dehydrogenase/reductase (SDR family) member 7	0.103	0.00919
A_33_P3397161		SHANK2-AS3	SHANK2 antisense RNA 3	-0.303	0.00919
A_24_P212531	D	B3GALNT2	beta-1,3-N-acetylgalactosaminyltransferase 2	-0.258	0.00921
A_24_P79712		COX20	COX20 cytochrome c oxidase assembly factor	-0.151	0.00923
A_24_P397150	D	GAK	cyclin G associated kinase	-0.185	0.00923
A_23_P3849		TRAP1	TNF receptor-associated protein 1	-0.148	0.00924
A_23_P209944		RETSAT	retinol saturase (all-trans-retinol 13,14-reductase)	-0.192	0.00925
A_24_P93703	D	TMEM198B	transmembrane protein 198B (pseudogene)	-0.23	0.00925
A_23_P126803		ARPC5	actin related protein 2/3 complex subunit 5	-0.17	0.00927
A_23_P423695		MXD4	MAX dimerization protein 4	-0.162	0.00928
A_21_P0012338	D	PI4KA	phosphatidylinositol 4-kinase, catalytic, alpha	-0.196	0.00928
A_24_P331373		GUCD1	guanylyl cyclase domain containing 1	0.301	0.00932
A_23_P34835	D	LMNA	lamin A/C	-0.134	0.00932
A_21_P0000917				-0.191	0.00935
A_23_P128706		DYNC1H1	dynein, cytoplasmic 1, heavy chain 1	-0.117	0.00936
A_23_P24623		ELP4	elongator acetyltransferase complex subunit 4	0.156	0.00936
A_24_P229669		GOLGA8IP	golgin A8 family member I, pseudogene	-0.261	0.00938
A_32_P85330		ST20-AS1	ST20 antisense RNA 1	0.176	0.00942
A_21_P0012528		LOC100134822	uncharacterized LOC100134822	-0.33	0.00945
A_23_P143374		NINL	ninein like	-0.217	0.00946
A_23_P98686		ATHL1	ATH1, acid trehalase-like 1 (yeast)	-0.329	0.00952
A_33_P3293798		KRTAP10-1	keratin associated protein 10-1	-0.2	0.00955
A_23_P501007		EFEMP1	EGF containing fibulin-like extracellular matrix protein 1	0.154	0.00957
A_23_P41487		TBC1D9	TBC1 domain family member 9	0.129	0.00958
A_32_P36942		TYW5	tRNA-yW synthesizing protein 5	-0.185	0.00958
A_23_P18205		RAD54L2	RAD54-like 2 (S. cerevisiae)	-0.113	0.00959
A_33_P3399248		UFM1	ubiquitin-fold modifier 1	0.126	0.00959
A_19_P00329711	D	MAVS	mitochondrial antiviral signaling protein	-0.202	0.00961
A_33_P3256902				-0.14	0.00965
A_33_P3418025		CTSO	cathepsin O	0.165	0.00966
A_24_P42681		PSMD2	proteasome 26S subunit, non-ATPase 2	-0.096	0.00966
A_24_P267664		B3GALT5-AS1	B3GALT5 antisense RNA 1	-0.303	0.00967
A_33_P3238976		TRMT5	tRNA methyltransferase 5	0.13	0.00968
A_24_P167825		VPS39	VPS39 HOPS complex subunit	-0.14	0.00968
A_33_P3367899		FRAT1	frequently rearranged in advanced T-cell lymphomas 1	0.179	0.00973
A_24_P30314		SCYL1	SCY1-like, kinase-like 1	-0.143	0.00975
A_19_P00320120	D	TUG1	taurine up-regulated 1 (non-protein coding)	-0.167	0.00984
A_21_P0013236		GTF2I	general transcription factor IIi	-0.205	0.00985
A_23_P57236		GGT7	gamma-glutamyltransferase 7	-0.14	0.00992
A_23_P12363		ROR1	receptor tyrosine kinase-like orphan receptor 1	0.097	0.00997
A_23_P82913		TRMT12	tRNA methyltransferase 12 homolog (S. cerevisiae)	0.103	0.00997
A_23_P110167		MGST2	microsomal glutathione S-transferase 2	0.129	0.00998
A_23_P435610		EMC1	ER membrane protein complex subunit 1	-0.125	0.01
A_23_P72737	D	IFITM1	interferon induced transmembrane protein 1	0.255	0.01
A_23_P395172		ABHD2	abhydrolase domain containing 2	-0.218	0.0101
A_33_P3211260		DBNL	drebrin-like	-0.359	0.0101
A_23_P169494		ORM1	orosomucoid 1	-0.231	0.0101
A_21_P0012259				-0.275	0.0102
A_24_P61864		CCDC47	coiled-coil domain containing 47	-0.146	0.0102
A_24_P253215		EMG1	EMG1 N1-specific pseudouridine methyltransferase	0.101	0.0102
A_23_P398294		HIP1R	huntingtin interacting protein 1 related	-0.189	0.0102
A_21_P0000153		NR3C1	nuclear receptor subfamily 3 group C member 1	-0.234	0.0102
A_33_P3266010		RIN1	Ras and Rab interactor 1	-0.147	0.0102
A_23_P120566		RRBP1	ribosome binding protein 1	-0.166	0.0102
A_23_P29248		TST	thiosulfate sulfurtransferase (rhodanese)	-0.09	0.0102
A_24_P155791		ASB7	ankyrin repeat and SOCS box containing 7	-0.19	0.0103
A_33_P3276638	D	HMBOX1	homeobox containing 1	-0.167	0.0103
A_24_P681011	D	HIPK2	homeodomain interacting protein kinase 2	-0.175	0.0103
A_24_P184445		MMP19	matrix metallopeptidase 19	-0.288	0.0103
A_23_P396299		MRVI1-AS1	MRVI1 antisense RNA 1	0.237	0.0103
A_33_P3381827		OSBPL2	oxysterol binding protein like 2	-0.143	0.0103
A_23_P250035		SDHA	succinate dehydrogenase complex subunit A, flavoprotein (Fp)	-0.131	0.0103
A_24_P190168		TMEM97	transmembrane protein 97	0.111	0.0103
A_19_P00326514				-0.242	0.0104
A_33_P3390013		ADAMTS1	ADAM metallopeptidase with thrombospondin type 1 motif 1	-0.234	0.0104
A_23_P56746		FAP	fibroblast activation protein alpha	0.224	0.0104
A_24_P378788		SLC35E1	solute carrier family 35 member E1	-0.156	0.0104
A_21_P0012979		GUSBP4	glucuronidase, beta pseudogene 4	-0.248	0.0105
A_23_P148513		GNG5	guanine nucleotide binding protein (G protein), gamma 5	0.095	0.0105
A_24_P245298		TNFSF12	tumor necrosis factor superfamily member 12	0.201	0.0105
A_24_P135276		USP42	ubiquitin specific peptidase 42	-0.128	0.0105
A_33_P3228931		CASS4	Cas scaffolding protein family member 4	-0.248	0.0106
A_23_P12526		TP53BP2	tumor protein p53 binding protein 2	0.183	0.0106
A_21_P0001031				-0.181	0.0107
A_23_P381261		ADCY4	adenylate cyclase 4	-0.282	0.0107
A_33_P3215788	D	ANKRD36	ankyrin repeat domain 36	-0.182	0.0107
A_23_P408376		HSPA12A	heat shock protein family A (Hsp70) member 12A	-0.129	0.0107
A_23_P202501		RNLS	renalase, FAD-dependent amine oxidase	0.164	0.0107
A_23_P80278		SFI1	SFI1 centrin binding protein	-0.245	0.0107
A_33_P3263170	D	SNRPG	small nuclear ribonucleoprotein polypeptide G	0.141	0.0107
A_33_P3315733		TRAPPC10	trafficking protein particle complex 10	-0.178	0.0107
A_32_P226567		UPF3A	UPF3 regulator of nonsense transcripts homolog A (yeast)	-0.167	0.0107
A_24_P203964	D	SMA4	glucuronidase, beta pseudogene	-0.278	0.0108
A_23_P143143		ID2	inhibitor of DNA binding 2, dominant negative helix-loop-helix protein	0.166	0.0108
A_33_P3309319		PIDD1	p53-induced death domain protein 1	-0.273	0.0108
A_23_P424002		POU2F1	POU class 2 homeobox 1	-0.218	0.0108
A_23_P308673		TAOK2	TAO kinase 2	0.211	0.0108
A_32_P3572		LOC100506797	uncharacterized LOC100506797	0.218	0.0108
A_23_P336992		ZFAND2A	zinc finger, AN1-type domain 2A	0.167	0.0108
A_21_P0001897				0.341	0.0109
A_23_P109881		ITIH4	inter-alpha-trypsin inhibitor heavy chain family member 4	-0.288	0.0109
A_21_P0014822				-0.375	0.011
A_21_P0007176				-0.171	0.011
A_21_P0011479				0.148	0.011
A_23_P169092		CYP7B1	cytochrome P450 family 7 subfamily B member 1	0.167	0.011
A_33_P3268838		CPEB1	cytoplasmic polyadenylation element binding protein 1	0.199	0.011
A_19_P00316398		MEG3	maternally expressed 3 (non-protein coding)	-0.358	0.011
A_24_P92256	D	SGSM2	small G protein signaling modulator 2	-0.147	0.011
A_24_P417189		DUSP9	dual specificity phosphatase 9	-0.212	0.0111
A_21_P0011405	D	GOLGA6L9 (includes others)	golgin A6 family-like 9	-0.297	0.0111
A_23_P339633		GPATCH11	G-patch domain containing 11	-0.139	0.0111
A_23_P258418		TNIP2	TNFAIP3 interacting protein 2	-0.126	0.0111
A_23_P208400		ADCK4	aarF domain containing kinase 4	-0.265	0.0112
A_23_P416178	D	CCDC136	coiled-coil domain containing 136	-0.249	0.0112
A_33_P3304983		PRKAR2B	protein kinase, cAMP-dependent, regulatory subunit type II beta	-0.214	0.0112
A_23_P92035		SETD5	SET domain containing 5	-0.177	0.0112
A_23_P383977		SNAPC5	small nuclear RNA activating complex polypeptide 5	0.119	0.0112
A_24_P327499		TTI1	TELO2 interacting protein 1	0.201	0.0112
A_33_P3405043				-0.211	0.0113
A_21_P0001596				0.188	0.0113
A_23_P334864		FAM126B	family with sequence similarity 126 member B	-0.162	0.0113
A_23_P207387		GHDC	GH3 domain containing	0.151	0.0113
A_23_P108662		MOGS	mannosyl-oligosaccharide glucosidase	-0.127	0.0113
A_21_P0010306		MIR99AHG	mir-99a-let-7c cluster host gene	0.221	0.0113
A_24_P136551		NPLOC4	NPL4 homolog, ubiquitin recognition factor	-0.364	0.0113
A_23_P144369		NAP1L5	nucleosome assembly protein 1-like 5	0.217	0.0113
A_33_P3589722		ATM	ATM serine/threonine kinase	0.272	0.0114
A_33_P3287825	D	CCDC136	coiled-coil domain containing 136	-0.164	0.0114
A_33_P3405114		ENHO	energy homeostasis associated	-0.208	0.0114
A_23_P2582		HDAC7	histone deacetylase 7	-0.158	0.0114
A_21_P0005934	D	HMBOX1	homeobox containing 1	-0.173	0.0114
A_23_P153441		HOOK2	hook microtubule-tethering protein 2	-0.212	0.0114
A_24_P128563		KPNA6	karyopherin alpha 6 (importin alpha 7)	0.118	0.0114
A_33_P3281807		PDDC1	Parkinson disease 7 domain containing 1	-0.194	0.0114
A_33_P3235987		PIN4	peptidylprolyl cis/trans isomerase, NIMA-interacting 4	0.154	0.0114
A_33_P3365134		PPP1R13B	protein phosphatase 1 regulatory subunit 13B	0.211	0.0114
A_33_P3281333		SNTB2	syntrophin beta 2	-0.147	0.0114
A_24_P941376		ZNF473	zinc finger protein 473	0.213	0.0114
A_33_P3362567				0.216	0.0115
A_33_P3571120		AP3D1	adaptor related protein complex 3 delta 1 subunit	-0.124	0.0115
A_23_P78108		ALDOC	aldolase, fructose-bisphosphate C	0.142	0.0115
A_21_P0000054		PET117	PET117 homolog	0.152	0.0115
A_21_P0000237		SNORA10	small nucleolar RNA, H/ACA box 10	-0.157	0.0116
A_21_P0012393				-0.436	0.0116
A_33_P3256033		CBL	Cbl proto-oncogene, E3 ubiquitin protein ligase	-0.173	0.0116
A_23_P97932		MSRB2	methionine sulfoxide reductase B2	0.09	0.0116
A_33_P3267263		RNVU1-18	RNA, variant U1 small nuclear 18	0.222	0.0116
A_33_P3210278		SYNE2	spectrin repeat containing, nuclear envelope 2	-0.175	0.0116
A_23_P166779		LINC00312	long intergenic non-protein coding RNA 312	-0.35	0.0117
A_33_P3272291		AKR1C4	aldo-keto reductase family 1, member C4	-0.275	0.0117
A_23_P500501		FGFR3	fibroblast growth factor receptor 3	0.204	0.0117
A_33_P3301851		MAP3K11	mitogen-activated protein kinase kinase kinase 11	-0.167	0.0117
A_23_P153360		SMIM7	small integral membrane protein 7	0.107	0.0117
A_23_P46871		SLC29A3	solute carrier family 29 (equilibrative nucleoside transporter), member 3	0.149	0.0117
A_23_P29922		TLR3	toll-like receptor 3	0.191	0.0117
A_21_P0005658				-0.345	0.0118
A_33_P3318534		PXYLP1	2-phosphoxylose phosphatase 1	-0.246	0.0118
A_23_P84836	D	NPEPPS	aminopeptidase puromycin sensitive	0.114	0.0118
A_23_P1775		DPAGT1	dolichyl-phosphate (UDP-N-acetylglucosamine) N-acetylglucosaminephosphotransferase 1 (GlcNAc-1-P transferase)	-0.1	0.0118
A_23_P30307		MED7	mediator complex subunit 7	0.15	0.0118
A_21_P0014601		SFPQ	splicing factor proline/glutamine-rich	-0.227	0.0118
A_24_P339858		TSPEAR-AS2	TSPEAR antisense RNA 2	-0.278	0.0118
A_21_P0012983		BRCAT54	breast cancer-associated transcript 54	0.128	0.0119
A_24_P87763		EEF2	eukaryotic translation elongation factor 2	-0.178	0.0119
A_23_P77779		RPL19	ribosomal protein L19	-0.126	0.0119
A_24_P289139		SH3KBP1	SH3-domain kinase binding protein 1	-0.171	0.0119
A_33_P3409904		VAMP4	vesicle associated membrane protein 4	0.146	0.0119
A_33_P3349597				-0.231	0.012
A_33_P3292814				-0.23	0.012
A_23_P110643		CDKL3	cyclin dependent kinase like 3	0.105	0.012
A_23_P106145		ERO1A	endoplasmic reticulum oxidoreductase alpha	0.141	0.012
A_23_P130149		ENO3	enolase 3 (beta, muscle)	-0.286	0.012
A_23_P89163		EXOC7	exocyst complex component 7	-0.104	0.012
A_24_P926400		GGA1	golgi-associated, gamma adaptin ear containing, ARF binding protein 1	-0.335	0.012
A_33_P3251984		MRGPRF	MAS related GPR family member F	-0.155	0.012
A_33_P3272090	D	PDE4DIP	phosphodiesterase 4D interacting protein	-0.211	0.012
A_21_P0005463				-0.27	0.0121
A_21_P0012253				-0.147	0.0121
A_24_P336931	D	ANKRD36	ankyrin repeat domain 36	0.171	0.0121
A_33_P3415500		TRIO	trio Rho guanine nucleotide exchange factor	-0.138	0.0121
A_32_P213637	D	LINC01061	long intergenic non-protein coding RNA 1061	-0.411	0.0122
A_24_P462899		CENPW	centromere protein W	0.174	0.0122
A_33_P3319161	D	FXN	frataxin	0.096	0.0122
A_23_P71821	D	PBX3	pre-B-cell leukemia homeobox 3	0.146	0.0122
A_23_P94141		RAD54B	RAD54 homolog B (S. cerevisiae)	0.182	0.0122
A_24_P161959		TMEM179B	transmembrane protein 179B	0.102	0.0122
A_21_P0013266	D	LOC101928451	uncharacterized LOC101928451	-0.203	0.0122
A_33_P3345643		ZDHHC11	zinc finger, DHHC-type containing 11	-0.286	0.0122
A_24_P414332		AFF1	AF4/FMR2 family member 1	-0.178	0.0123
A_23_P83976		CEP112	centrosomal protein 112kDa	0.189	0.0123
A_23_P141520		C17orf49	chromosome 17 open reading frame 49	0.109	0.0123
A_23_P93046		EXOC3	exocyst complex component 3	-0.118	0.0123
A_23_P134426		GPNMB	glycoprotein (transmembrane) nmb	0.221	0.0123
A_23_P396867		HM13	histocompatibility (minor) 13	-0.256	0.0123
A_23_P115137		LAMTOR5	late endosomal/lysosomal adaptor, MAPK and MTOR activator 5	0.106	0.0123
A_33_P3414157		MLPH	melanophilin	-0.207	0.0123
A_24_P112750		TFCP2	transcription factor CP2	0.137	0.0123
A_21_P0008662				-0.294	0.0124
A_33_P3220445		SMAD5	SMAD family member 5	-0.137	0.0124
A_23_P102235	D	SNRPG	small nuclear ribonucleoprotein polypeptide G	0.134	0.0124
A_33_P3394234		ZNF133	zinc finger protein 133	-0.148	0.0124
A_24_P233786		FAM129A	family with sequence similarity 129 member A	0.235	0.0125
A_23_P153964		INHBB	inhibin beta B	0.136	0.0125
A_33_P3369158		KIF3C	kinesin family member 3C	-0.155	0.0125
A_24_P374962		STAG3L2/STAG3L3	stromal antigen 3-like 3 (pseudogene)	-0.17	0.0125
A_23_P362228		ZNF436-AS1	ZNF436 antisense RNA 1	0.142	0.0125
A_24_P49533		ZYG11B	zyg-11 family member B, cell cycle regulator	-0.111	0.0125
A_33_P3375314		ATP9A	ATPase, class II, type 9A	0.17	0.0126
A_24_P333733		ATP6V0A1	ATPase, H+ transporting, lysosomal V0 subunit a1	-0.193	0.0126
A_23_P259442		CPE	carboxypeptidase E	0.175	0.0126
A_33_P3335596		C17orf62	chromosome 17 open reading frame 62	-0.146	0.0126
A_33_P3270802		CPSF3L	cleavage and polyadenylation specific factor 3-like	-0.185	0.0126
A_33_P3345479		MIRLET7BHG	MIRLET7B host gene	-0.258	0.0126
A_23_P134295		NUDT1	nudix hydrolase 1	0.127	0.0126
A_24_P413884		CENPA	centromere protein A	0.182	0.0127
A_33_P3334515		NDRG2	NDRG family member 2	-0.179	0.0127
A_23_P166023		PFDN4	prefoldin subunit 4	0.126	0.0127
A_32_P216872	D	PDXDC2P	pyridoxal-dependent decarboxylase domain containing 2, pseudogene	-0.547	0.0127
A_23_P1638		RBM4B	RNA binding motif protein 4B	0.148	0.0127
A_23_P166663		APPL1	adaptor protein, phosphotyrosine interaction, PH domain and leucine zipper containing 1	-0.132	0.0128
A_23_P152984		ALYREF	Aly/REF export factor	0.122	0.0128
A_19_P00315668	D	HIPK2	homeodomain interacting protein kinase 2	-0.203	0.0128
A_19_P00324839	D	MALAT1	metastasis associated lung adenocarcinoma transcript 1 (non-protein coding)	-0.371	0.0128
A_23_P141651	D	NCOR1	nuclear receptor corepressor 1	-0.166	0.0128
A_19_P00323737	D	PTPN14	protein tyrosine phosphatase, non-receptor type 14	-0.13	0.0128
A_21_P0011809	D	ANKRD36BP2	ankyrin repeat domain 36B pseudogene 2	-0.174	0.0129
A_21_P0014553		DUXAP10	double homeobox A pseudogene 10	-0.21	0.0129
A_23_P45699		FUBP1	far upstream element (FUSE) binding protein 1	0.125	0.0129
A_23_P363316		HOXB5	homeobox B5	-0.191	0.0129
A_33_P3399107	D	PI4KA	phosphatidylinositol 4-kinase, catalytic, alpha	-0.201	0.0129
A_21_P0011572		USP32P2	ubiquitin specific peptidase 32 pseudogene 2	-0.186	0.0129
A_33_P3265415				-0.366	0.013
A_21_P0009275				-0.229	0.013
A_33_P3238290		FAM65C	family with sequence similarity 65 member C	-0.295	0.013
A_33_P3243439		GPR162	G protein-coupled receptor 162	-0.168	0.013
A_23_P339480		HAT1	histone acetyltransferase 1	0.101	0.013
A_19_P00321333	D	NEAT1	nuclear paraspeckle assembly transcript 1 (non-protein coding)	-0.407	0.013
A_23_P13359		NXF1	nuclear RNA export factor 1	-0.213	0.013
A_23_P55256		ZNF652	zinc finger protein 652	-0.286	0.013
A_23_P63789		ZWINT	ZW10 interacting kinetochore protein	0.229	0.013
A_23_P68868	D	TUG1	taurine up-regulated 1 (non-protein coding)	-0.125	0.0131
A_23_P428248		TTC21A	tetratricopeptide repeat domain 21A	-0.314	0.0131
A_33_P3364051		TOP3B	topoisomerase (DNA) III beta	-0.142	0.0131
A_33_P3251617		LINC01118	long intergenic non-protein coding RNA 1118	-0.325	0.0132
A_33_P3298771				-0.247	0.0132
A_21_P0009131				-0.184	0.0132
A_21_P0011049				0.184	0.0132
A_32_P120791				0.185	0.0132
A_23_P60517	D	FXN	frataxin	0.105	0.0132
A_33_P3223121	D	HIPK2	homeodomain interacting protein kinase 2	-0.152	0.0132
A_24_P238143		LRRC37A3 (includes others)	leucine-rich repeat containing 37 member A3	-0.17	0.0132
A_33_P3291569		LUC7L3	LUC7-like 3 pre-mRNA splicing factor	-0.137	0.0132
A_33_P3375528		MIER3	mesoderm induction early response 1, family member 3	0.19	0.0132
A_21_P0013136				-0.321	0.0133
A_23_P105138		CAT	catalase	-0.103	0.0133
A_23_P136347		EPS8	epidermal growth factor receptor pathway substrate 8	-0.144	0.0133
A_21_P0011816		IGSF3	immunoglobulin superfamily member 3	-0.292	0.0133
A_21_P0012340	D	PI4KA	phosphatidylinositol 4-kinase, catalytic, alpha	-0.147	0.0133
A_23_P257423		ALG14	ALG14, UDP-N-acetylglucosaminyltransferase subunit	0.144	0.0134
A_24_P181998		GUSBP11	glucuronidase, beta pseudogene 11	-0.145	0.0134
A_33_P3216517		NEK6	NIMA related kinase 6	-0.227	0.0134
A_24_P237661	D	NCOR1	nuclear receptor corepressor 1	-0.19	0.0134
A_23_P132763		VGLL3	vestigial like family member 3	-0.164	0.0134
A_23_P434430		ZNF439	zinc finger protein 439	0.183	0.0134
A_19_P00811940				-0.221	0.0135
A_23_P303803		C19orf18	chromosome 19 open reading frame 18	-0.17	0.0135
A_23_P66608		KAT2A	K(lysine) acetyltransferase 2A	-0.32	0.0135
A_23_P10911		PLBD2	phospholipase B domain containing 2	0.141	0.0135
A_23_P122464		ZSCAN9	zinc finger and SCAN domain containing 9	0.126	0.0135
A_33_P3259902				0.147	0.0136
A_33_P3245168		FAM71F2	family with sequence similarity 71 member F2	-0.225	0.0136
A_24_P303524		MICALL2	MICAL-like 2	-0.25	0.0136
A_33_P3403132		NR2F6	nuclear receptor subfamily 2 group F member 6	-0.101	0.0136
A_23_P218190		CAPN3	calpain 3	-0.308	0.0137
A_23_P168771		CCDC146	coiled-coil domain containing 146	-0.228	0.0137
A_33_P3299766		FAM160B1	family with sequence similarity 160 member B1	-0.268	0.0137
A_33_P3344405		MEF2B	myocyte enhancer factor 2B	-0.14	0.0137
A_33_P3365732		TNKS1BP1	tankyrase 1 binding protein 1	-0.191	0.0137
A_21_P0000233		SNORD38A	small nucleolar RNA, C/D box 38A	-0.242	0.0138
A_21_P0013784				-0.209	0.0138
A_33_P3322415		MARK4	MAP/microtubule affinity-regulating kinase 4	0.238	0.0138
A_23_P113701		PDGFA	platelet derived growth factor subunit A	0.185	0.0138
A_21_P0014806		LOC100507131	uncharacterized LOC100507131	-0.367	0.0138
A_23_P117582		JDP2	Jun dimerization protein 2	0.117	0.0139
A_33_P3247858		MPP1	membrane protein, palmitoylated 1	0.184	0.0139
A_33_P3265355	D	SNRPE	small nuclear ribonucleoprotein polypeptide E	0.148	0.0139
A_33_P3722568		LINC00685	long intergenic non-protein coding RNA 685	-0.464	0.014
A_33_P3286046		DPCD	deleted in primary ciliary dyskinesia homolog (mouse)	0.118	0.014
A_23_P103442		MEAF6	MYST/Esa1-associated factor 6	0.091	0.014
A_33_P3227472		SDSL	serine dehydratase-like	0.158	0.014
A_33_P3323188		LOC728743	zinc finger protein pseudogene	-0.168	0.014
A_24_P104538		BPTF	bromodomain PHD finger transcription factor	-0.155	0.0141
A_23_P398491		C15orf57	chromosome 15 open reading frame 57	-0.157	0.0141
A_24_P8075	D	KLHDC4	kelch domain containing 4	-0.244	0.0141
A_24_P269062		SPRY4	sprouty RTK signaling antagonist 4	-0.149	0.0141
A_23_P36157		WDR74	WD repeat domain 74	-0.109	0.0141
A_23_P400147		CCDC61	coiled-coil domain containing 61	-0.24	0.0142
A_23_P391689		PET100	PET100 homolog	0.102	0.0142
A_24_P315346		POM121L8P	POM121 transmembrane nucleoporin like 8, pseudogene	-0.405	0.0142
A_23_P137248		PRKY	protein kinase, Y-linked, pseudogene	-0.173	0.0142
A_21_P0000348		SNORA80A	small nucleolar RNA, H/ACA box 80A	-0.199	0.0143
A_23_P215479		CLIP2	CAP-Gly domain containing linker protein 2	0.167	0.0143
A_33_P3232527		EDEM3	ER degradation enhancer, mannosidase alpha-like 3	-0.114	0.0143
A_24_P177604		PPP1R3F	protein phosphatase 1 regulatory subunit 3F	-0.193	0.0143
A_33_P3235690		THOC2	THO complex 2	-0.204	0.0143
A_33_P3321369		ALDH1A3	aldehyde dehydrogenase 1 family member A3	-0.241	0.0144
A_32_P233938		FAM133B	family with sequence similarity 133 member B	-0.13	0.0144
A_24_P67898		MGEA5	meningioma expressed antigen 5 (hyaluronidase)	-0.243	0.0144
A_33_P3397298				-0.177	0.0145
A_23_P171223		CXorf56	chromosome X open reading frame 56	0.173	0.0145
A_21_P0003135				0.42	0.0146
A_23_P47426		ACAD8	acyl-CoA dehydrogenase family member 8	-0.148	0.0146
A_33_P3416574		AIG1	androgen-induced 1	0.097	0.0146
A_23_P73493		CETN2	centrin 2	0.147	0.0146
A_23_P27075		GABARAP	GABA(A) receptor-associated protein	0.123	0.0146
A_33_P3352103		LYPLAL1	lysophospholipase-like 1	0.157	0.0146
A_24_P245108		USP7	ubiquitin specific peptidase 7 (herpes virus-associated)	0.188	0.0146
A_33_P3296862		C16orf89	chromosome 16 open reading frame 89	0.206	0.0147
A_23_P11262		F8A1 (includes others)	coagulation factor VIII-associated 1	-0.096	0.0147
A_24_P51588	D	CCNL2	cyclin L2	-0.265	0.0147
A_32_P130265	D	ZC3H11A	zinc finger CCCH-type containing 11A	-0.111	0.0147
A_33_P3322082				-0.412	0.0148
A_21_P0011143				-0.199	0.0148
A_23_P169470		CDK9	cyclin-dependent kinase 9	-0.093	0.0148
A_33_P3318668		CYSRT1	cysteine-rich tail protein 1	-0.216	0.0148
A_33_P3374878		FAT4	FAT atypical cadherin 4	-0.195	0.0148
A_23_P323685		HIST1H4H	histone cluster 1, H4h	0.148	0.0148
A_33_P3391105	D	LRP1	LDL receptor related protein 1	-0.168	0.0148
A_23_P26358	D	SMG1	SMG1 phosphatidylinositol 3-kinase-related kinase	-0.246	0.0148
A_21_P0006215				0.197	0.0149
A_21_P0009726				0.294	0.0149
A_23_P12635		FBXL15	F-box and leucine-rich repeat protein 15	-0.118	0.0149
A_19_P00321471	D	HCG18	HLA complex group 18 (non-protein coding)	-0.18	0.0149
A_32_P20523		TIGD2	tigger transposable element derived 2	0.165	0.0149
A_24_P179611		TPR	translocated promoter region, nuclear basket protein	-0.129	0.0149
A_23_P20196		ARPC1B	actin related protein 2/3 complex subunit 1B	-0.145	0.015
A_23_P145089		HSP90AB1	heat shock protein 90kDa alpha family class B member 1	-0.097	0.015
A_24_P418637	D	MACF1	microtubule-actin crosslinking factor 1	-0.161	0.015
A_23_P433990	D	SPG7	spastic paraplegia 7 (pure and complicated autosomal recessive)	-0.172	0.015
A_33_P3252333		SNORD3B-1	small nucleolar RNA, C/D box 3B-1	-0.35	0.0151
A_23_P39542		C2orf76	chromosome 2 open reading frame 76	0.106	0.0151
A_33_P3227284		OGT	O-linked N-acetylglucosamine (GlcNAc) transferase	-0.198	0.0151
A_23_P17914		PNPLA3	patatin like phospholipase domain containing 3	-0.267	0.0151
A_19_P00316344		LOC105376323	uncharacterized LOC105376323	-0.416	0.0151
A_33_P3264746				-0.174	0.0152
A_33_P3395883				-0.142	0.0152
A_21_P0013071				0.23	0.0152
A_33_P3322654		RNPEPL1	arginyl aminopeptidase (aminopeptidase B)-like 1	-0.13	0.0152
A_23_P24176		CCNJ	cyclin J	0.197	0.0152
A_24_P322635		ELMO2	engulfment and cell motility 2	-0.175	0.0152
A_23_P88234		EMC9	ER membrane protein complex subunit 9	0.097	0.0152
A_33_P3230090		LUZP6	leucine zipper protein 6	0.203	0.0152
A_23_P350754		OR7E14P	olfactory receptor family 7 subfamily E member 14 pseudogene	0.122	0.0152
A_23_P206856		WDR59	WD repeat domain 59	-0.132	0.0152
A_33_P3238058		LINC01101	long intergenic non-protein coding RNA 1101	-0.196	0.0153
A_24_P267686				-0.31	0.0153
A_21_P0000094		CD33	CD33 molecule	-0.329	0.0153
A_23_P425502		DONSON	downstream neighbor of SON	-0.141	0.0153
A_23_P154806		EPB41L1	erythrocyte membrane protein band 4.1-like 1	0.154	0.0153
A_33_P3262833	D	GOLGA8EP/GOLGA8G	golgin A8 family member G	-0.243	0.0153
A_33_P3380263		MTG1	mitochondrial ribosome-associated GTPase 1	-0.174	0.0153
A_33_P3294917		PRUNE2	prune homolog 2 (Drosophila)	-0.194	0.0153
A_33_P3313258	D	ATAD3B	ATPase family, AAA domain containing 3B	-0.375	0.0154
A_23_P164536		PIK3C3	phosphatidylinositol 3-kinase catalytic subunit type 3	0.084	0.0154
A_33_P3310293		PKIG	protein kinase (cAMP-dependent, catalytic) inhibitor gamma	-0.15	0.0154
A_32_P47754		SLC2A14	solute carrier family 2 (facilitated glucose transporter), member 14	0.192	0.0154
A_33_P3397658		SYNPO	synaptopodin	-0.195	0.0154
A_33_P3353030		UCN	urocortin	-0.232	0.0154
A_24_P17722		TBC1D9B	TBC1 domain family member 9B	-0.115	0.0155
A_19_P00329511	D	XIST	X inactive specific transcript (non-protein coding)	-0.349	0.0155
A_33_P3321577		BAZ1B	bromodomain adjacent to zinc finger domain 1B	-0.112	0.0156
A_33_P3651911		CASC7	cancer susceptibility candidate 7 (non-protein coding)	-0.211	0.0156
A_24_P406301		NDUFB2	NADH:ubiquinone oxidoreductase subunit B2	0.155	0.0156
A_21_P0002496				0.368	0.0157
A_23_P212196		OGG1	8-oxoguanine DNA glycosylase	-0.111	0.0157
A_24_P236235		FLRT2	fibronectin leucine rich transmembrane protein 2	0.163	0.0157
A_24_P55496		OSR2	odd-skipped related transciption factor 2	-0.191	0.0157
A_33_P3398448		PARP10	poly(ADP-ribose) polymerase family member 10	-0.186	0.0157
A_23_P59138		POU5F1	POU class 5 homeobox 1	-0.31	0.0157
A_33_P3281283		S1PR3	sphingosine-1-phosphate receptor 3	-0.153	0.0157
A_33_P3238177		ZNF37A	zinc finger protein 37A	-0.115	0.0157
A_23_P346421		ZNF532	zinc finger protein 532	0.127	0.0157
A_33_P3365117	D	AKR1C1/AKR1C2	aldo-keto reductase family 1, member C2	-0.201	0.0158
A_23_P258018		MYL5	myosin light chain 5	0.127	0.0158
A_21_P0010978	D	NEAT1	nuclear paraspeckle assembly transcript 1 (non-protein coding)	-0.677	0.0158
A_33_P3366146		SRSF5	serine/arginine-rich splicing factor 5	-0.188	0.0158
A_23_P406227		SNAI3-AS1	SNAI3 antisense RNA 1	-0.137	0.0158
A_32_P136402		THOC7	THO complex 7	0.126	0.0158
A_21_P0009342		WFDC21P	WAP four-disulfide core domain 21, pseudogene	-0.188	0.0158
A_24_P37540	D	ARPC4-TTLL3	ARPC4-TTLL3 readthrough	-0.328	0.0159
A_32_P88635		NBPF3	neuroblastoma breakpoint family member 3	-0.169	0.0159
A_23_P19210		RPF2	ribosome production factor 2 homolog	0.104	0.0159
A_19_P00317052		RNF213	ring finger protein 213	-0.164	0.0159
A_21_P0009825		LOC101929371	uncharacterized LOC101929371	-0.243	0.0159
A_33_P3229380		LINC01001 (includes others)	long intergenic non-protein coding RNA 1347	-0.232	0.016
A_33_P3888485		BCO2	beta-carotene oxygenase 2	-0.268	0.016
A_23_P1602		CDC42EP2	CDC42 effector protein 2	-0.163	0.016
A_23_P141779		CXXC1	CXXC finger protein 1	-0.122	0.016
A_23_P200489		TMEM63A	transmembrane protein 63A	-0.163	0.016
A_21_P0000240		SNORD100	small nucleolar RNA, C/D box 100	0.142	0.0161
A_33_P3578325		SNORD15A	small nucleolar RNA, C/D box 15A	0.162	0.0161
A_21_P0010470				-0.218	0.0161
A_33_P3292915		TCOF1	Treacher Collins-Franceschetti syndrome 1	-0.157	0.0161
A_23_P377888		FAN1	FANCD2/FANCI-associated nuclease 1	-0.105	0.0162
A_23_P132718		SEMA3B	semaphorin 3B	-0.214	0.0162
A_32_P396186		TRIM66	tripartite motif containing 66	-0.227	0.0162
A_33_P3412294		ZSCAN2	zinc finger and SCAN domain containing 2	0.38	0.0162
A_24_P343377	D	ATP5J2	ATP synthase, H+ transporting, mitochondrial Fo complex subunit F2	0.087	0.0163
A_23_P78268		GLOD4	glyoxalase domain containing 4	0.13	0.0163
A_21_P0011298	D	HERC2	HECT and RLD domain containing E3 ubiquitin protein ligase 2	-0.245	0.0163
A_23_P329152		ILF3	interleukin enhancer binding factor 3	-0.13	0.0163
A_23_P200792		NOTCH2	notch 2	-0.099	0.0163
A_23_P254733		CENPU	centromere protein U	0.183	0.0164
A_33_P3390232		EHMT2	euchromatic histone-lysine N-methyltransferase 2	-0.281	0.0164
A_24_P820037		SLC6A17	solute carrier family 6 (neutral amino acid transporter), member 17	-0.67	0.0164
A_21_P0007713		LOC100506844	uncharacterized LOC100506844	0.139	0.0164
A_21_P0010791		LINC01354	long intergenic non-protein coding RNA 1354	0.164	0.0165
A_19_P00809055		LINC00909	long intergenic non-protein coding RNA 909	-0.222	0.0165
A_23_P48056		CKAP4	cytoskeleton-associated protein 4	-0.128	0.0165
A_23_P159775		GABRE	gamma-aminobutyric acid (GABA) A receptor, epsilon	-0.416	0.0165
A_33_P3221999		GSDMB	gasdermin B	-0.381	0.0165
A_24_P287043		IFITM2	interferon induced transmembrane protein 2	0.094	0.0165
A_33_P3270109		LEO1	LEO1 homolog, Paf1/RNA polymerase II complex component	-0.159	0.0165
A_33_P3381338	D	TNXB	tenascin XB	-0.439	0.0165
A_24_P294851		TRIM38	tripartite motif containing 38	-0.193	0.0165
A_19_P00319630				-0.265	0.0166
A_33_P3232334		ARMCX4	armadillo repeat containing, X-linked 4	0.253	0.0166
A_21_P0013993		FAM104B	family with sequence similarity 104 member B	0.192	0.0166
A_23_P149249		KRTCAP2	keratinocyte associated protein 2	0.098	0.0166
A_33_P3236868		MT1X	metallothionein 1X	0.159	0.0166
A_23_P384499		RPTOR	regulatory associated protein of MTOR, complex 1	-0.105	0.0166
A_33_P3386459		ARHGAP5	Rho GTPase activating protein 5	0.179	0.0166
A_21_P0009212				-0.213	0.0167
A_33_P3364964				0.274	0.0167
A_23_P143178		LBP	lipopolysaccharide binding protein	0.249	0.0167
A_21_P0000100		MTRNR2L1	MT-RNR2-like 1	-0.166	0.0167
A_33_P3808996		SPATS2	spermatogenesis associated, serine rich 2	-0.144	0.0167
A_33_P3217028		TM9SF1	transmembrane 9 superfamily member 1	-0.078	0.0167
A_24_P346604		UBE2W	ubiquitin conjugating enzyme E2W (putative)	0.221	0.0167
A_33_P3223111				0.144	0.0168
A_23_P218331		CYB561	cytochrome b561	-0.124	0.0168
A_21_P0005511				-0.128	0.0169
A_23_P26223		ASL	argininosuccinate lyase	-0.109	0.0169
A_24_P303989		BMI1	BMI1 proto-oncogene, polycomb ring finger	-0.16	0.0169
A_33_P3340718		KDM6A	lysine (K)-specific demethylase 6A	0.194	0.0169
A_33_P3298861		SLC12A8	solute carrier family 12, member 8	0.213	0.0169
A_23_P77661		ZNF720	zinc finger protein 720	-0.131	0.0169
A_24_P186986				0.126	0.017
A_23_P107322		CORO6	coronin 6	-0.143	0.017
A_33_P3502037	D	CHORDC1	cysteine and histidine rich domain containing 1	-0.213	0.017
A_19_P00325158	D	MALAT1	metastasis associated lung adenocarcinoma transcript 1 (non-protein coding)	-0.346	0.0171
A_23_P131365		NDUFS1	NADH:ubiquinone oxidoreductase core subunit S1	-0.115	0.0171
A_33_P3290487		ZNF668	zinc finger protein 668	-0.175	0.0171
A_21_P0012265				-0.182	0.0172
A_33_P3374623		ABCA7	ATP binding cassette subfamily A member 7	-0.26	0.0172
A_23_P408675		BTAF1	B-TFIID TATA-box binding protein associated factor 1	-0.164	0.0172
A_33_P3239087		FAM87A	family with sequence similarity 87 member A	0.264	0.0172
A_19_P00805006	D	MALAT1	metastasis associated lung adenocarcinoma transcript 1 (non-protein coding)	-0.402	0.0172
A_33_P3369133	D	LOC100996724	phosphodiesterase 4D interacting protein-like	0.155	0.0172
A_23_P6818		SEMA3G	semaphorin 3G	-0.234	0.0172
A_33_P3327479		ZDHHC3	zinc finger, DHHC-type containing 3	-0.204	0.0172
A_23_P128956		ZFYVE1	zinc finger, FYVE domain containing 1	0.099	0.0172
A_23_P23611	D	AMY1C (includes others)	amylase, alpha 1A (salivary)	-0.325	0.0173
A_33_P3242493		PIBF1	progesterone immunomodulatory binding factor 1	-0.175	0.0173
A_24_P605190		PGGT1B	protein geranylgeranyltransferase type I, beta subunit	0.148	0.0173
A_24_P67552				-0.132	0.0174
A_33_P3314436		FBXL17	F-box and leucine-rich repeat protein 17	-0.195	0.0174
A_33_P3240912	D	MAGT1	magnesium transporter 1	0.151	0.0174
A_33_P3328410		LOC101927789	putative ubiquitin-like protein FUBI-like protein ENSP00000310146	-0.255	0.0174
A_23_P214666		RPS18	ribosomal protein S18	-0.144	0.0174
A_33_P3304538		RNF207	ring finger protein 207	-0.298	0.0174
A_33_P3391496				-0.217	0.0175
A_33_P3316639		CHMP3	charged multivesicular body protein 3	0.133	0.0175
A_33_P3361442		C19orf73	chromosome 19 open reading frame 73	-0.225	0.0175
A_33_P3304312		CELF6	CUGBP, Elav-like family member 6	-0.197	0.0175
A_23_P82748		ENY2	enhancer of yellow 2 homolog (Drosophila)	0.117	0.0175
A_32_P199252	D	HSP90AA1	heat shock protein 90kDa alpha family class A member 1	-0.151	0.0175
A_33_P3380612	D	HSPG2	heparan sulfate proteoglycan 2	-0.173	0.0175
A_23_P215024		LRRC1	leucine rich repeat containing 1	0.182	0.0175
A_33_P3244026	D	MAVS	mitochondrial antiviral signaling protein	-0.131	0.0175
A_24_P110558		IGIP	IgA-inducing protein	-0.121	0.0176
A_23_P202594		MCMBP	minichromosome maintenance complex binding protein	0.099	0.0176
A_23_P137157		RENBP	renin binding protein	0.271	0.0176
A_33_P3249002				0.118	0.0177
A_32_P10100				0.14	0.0177
A_24_P284523		MAP3K10	mitogen-activated protein kinase kinase kinase 10	-0.182	0.0177
A_23_P87603		TARBP2	TAR (HIV-1) RNA binding protein 2	-0.125	0.0177
A_24_P816384	D	UBE2Q2P1	ubiquitin conjugating enzyme E2Q family member 2 pseudogene 1	-0.173	0.0177
A_24_P188377		CD55	CD55 molecule (Cromer blood group)	0.217	0.0178
A_23_P111797		LOC84214	uncharacterized LOC84214	-0.274	0.0178
A_23_P43157		MYBL1	v-myb avian myeloblastosis viral oncogene homolog-like 1	0.214	0.0178
A_24_P40594		HOMEZ	homeobox and leucine zipper encoding	0.133	0.0179
A_33_P3319463		NCOA4	nuclear receptor coactivator 4	-0.128	0.0179
A_33_P3308872		POM121L1P	POM121 transmembrane nucleoporin like 1, pseudogene	-0.26	0.0179
A_21_P0000092		ZBED6	zinc finger, BED-type containing 6	-0.138	0.0179
A_33_P3362239				-0.212	0.018
A_21_P0012245		CECR7	cat eye syndrome chromosome region, candidate 7 (non-protein coding)	-0.3	0.018
A_23_P23983		FAM188A	family with sequence similarity 188 member A	0.096	0.018
A_23_P102842		NFS1	NFS1 cysteine desulfurase	-0.085	0.018
A_32_P31771		KIAA1715	KIAA1715	0.136	0.0181
A_33_P3394789				-0.195	0.0182
A_23_P313476		FAM120B	family with sequence similarity 120B	-0.181	0.0182
A_23_P144677		LNPEP	leucyl/cystinyl aminopeptidase	-0.135	0.0182
A_23_P20494		NDRG1	N-myc downstream regulated 1	0.182	0.0182
A_33_P3223923		PDIA3	protein disulfide isomerase family A member 3	0.151	0.0182
A_33_P3420053		ZNF415	zinc finger protein 415	0.156	0.0182
A_32_P75425	D	LINC01061	long intergenic non-protein coding RNA 1061	-0.371	0.0183
A_23_P158041		AQP7	aquaporin 7	-0.277	0.0183
A_33_P3214635		FECH	ferrochelatase	0.133	0.0183
A_33_P3358977		RNASEH2C	ribonuclease H2 subunit C	-0.213	0.0183
A_24_P71938		SMAD1	SMAD family member 1	0.129	0.0183
A_33_P3250963		TP53TG1	TP53 target 1 (non-protein coding)	0.137	0.0183
A_21_P0011340		LINC00933	long intergenic non-protein coding RNA 933	-0.249	0.0184
A_24_P307384				-0.2	0.0184
A_33_P3271925		ARFGEF2	ADP ribosylation factor guanine nucleotide exchange factor 2	0.112	0.0184
A_23_P159650		COX7B	cytochrome c oxidase subunit VIIb	0.104	0.0184
A_32_P175301		DENND3	DENN/MADD domain containing 3	-0.14	0.0184
A_24_P202567		ITPKC	inositol-trisphosphate 3-kinase C	-0.115	0.0184
A_24_P68585		SHC1	SHC (Src homology 2 domain containing) transforming protein 1	-0.16	0.0184
A_23_P47527		TMEM258	transmembrane protein 258	0.147	0.0184
A_24_P9883		AP5B1	adaptor related protein complex 5, beta 1 subunit	-0.174	0.0185
A_33_P3413463		BRF1	BRF1, RNA polymerase III transcription initiation factor 90 kDa subunit	-0.145	0.0185
A_21_P0014816	D	LOC101927151	uncharacterized LOC101927151	-0.165	0.0185
A_23_P151506		PLEK2	pleckstrin 2	0.231	0.0186

## Sheet: RNA BPF at 10 nM
ID	Duplication	Symbol	Gene Name	log2FC	Pvalue
A_33_P3290909		SMC1A	structural maintenance of chromosomes 1A	-0.331	2.95e-06
A_23_P373521		HAND2	heart and neural crest derivatives expressed 2	0.259	1.01e-05
A_23_P170608		TSPYL2	TSPY-like 2	0.292	2.52e-05
A_23_P120125		COLEC11	collectin subfamily member 11	0.216	2.69e-05
A_23_P146922		GAS6	growth arrest specific 6	0.246	3.4e-05
A_23_P90014		GPR108	G protein-coupled receptor 108	0.187	4.63e-05
A_33_P3351536		PTK2B	protein tyrosine kinase 2 beta	0.265	4.99e-05
A_33_P3327519		SNORA74A	small nucleolar RNA, H/ACA box 74A	0.377	5.5e-05
A_33_P3321657		HSPG2	heparan sulfate proteoglycan 2	-0.293	7.05e-05
A_23_P133474	D	GPX3	glutathione peroxidase 3	0.387	7.1e-05
A_23_P410998		RAB5B	RAB5B, member RAS oncogene family	0.202	7.46e-05
A_23_P15108		YPEL3	yippee like 3	0.236	8.66e-05
A_33_P3389394		RPPH1	ribonuclease P RNA component H1	-0.296	9.5e-05
A_23_P86943		SRPRA	SRP receptor alpha subunit	0.179	0.000119
A_23_P114883		FMOD	fibromodulin	0.152	0.00012
A_24_P419309		SNRNP40	small nuclear ribonucleoprotein, U5 40kDa subunit	0.262	0.000123
A_24_P100277		CYB5R3	cytochrome b5 reductase 3	0.198	0.000131
A_23_P97795		ACBD5	acyl-CoA binding domain containing 5	-0.22	0.000133
A_23_P158053		C9orf16	chromosome 9 open reading frame 16	0.187	0.000134
A_23_P110531		FST	follistatin	0.215	0.000161
A_24_P11315		OLFML3	olfactomedin like 3	0.264	0.000162
A_23_P500364		BCL7B	B-cell CLL/lymphoma 7B	0.169	0.000164
A_33_P3390107		RNA18S5	RNA, 18S ribosomal 5	-0.563	0.000185
A_23_P70307	D	SMOC2	SPARC related modular calcium binding 2	0.325	0.00019
A_23_P105066		ILK	integrin linked kinase	0.204	0.000199
A_23_P214897		AKAP12	A-kinase anchoring protein 12	-0.306	0.000209
A_23_P157914		MAMDC2	MAM domain containing 2	0.24	0.000227
A_23_P139123	D	SERPING1	serpin peptidase inhibitor, clade G (C1 inhibitor), member 1	0.24	0.000243
A_23_P71530		TNFRSF11B	tumor necrosis factor receptor superfamily member 11b	0.253	0.000247
A_33_P3230073				-0.158	0.000251
A_33_P3354935	D	CSF1	colony stimulating factor 1	0.242	0.000277
A_24_P144773		RNF145	ring finger protein 145	0.22	0.000286
A_23_P144476		SPRY1	sprouty RTK signaling antagonist 1	0.216	0.00031
A_33_P3228266		CST3	cystatin C	0.235	0.00035
A_24_P364042		CH17-360D5.1/NPY4R	neuropeptide Y receptor Y4	0.288	0.000382
A_33_P3404701		SEL1L	sel-1 suppressor of lin-12-like (C. elegans)	0.193	0.000446
A_23_P12884		GRK5	G protein-coupled receptor kinase 5	0.23	0.000447
A_23_P87545		IFITM3	interferon induced transmembrane protein 3	0.18	0.000463
A_23_P143526		S100B	S100 calcium binding protein B	-0.324	0.000466
A_24_P250765		PRKG1	protein kinase, cGMP-dependent, type I	0.258	0.000476
A_33_P3344831		TMEM45A	transmembrane protein 45A	0.183	0.000477
A_23_P123866		UBAP1	ubiquitin associated protein 1	0.126	0.000502
A_33_P3225760		PCDH18	protocadherin 18	0.278	0.000524
A_21_P0014132				-0.171	0.000533
A_33_P3390570		KMT2A	lysine (K)-specific methyltransferase 2A	-0.199	0.000533
A_24_P15502				0.23	0.000555
A_23_P101093		COPZ2	coatomer protein complex subunit zeta 2	0.143	0.000556
A_23_P306655		AMIGO3	adhesion molecule with Ig-like domain 3	0.197	0.000563
A_23_P137209		UBA1	ubiquitin-like modifier activating enzyme 1	0.144	0.000567
A_33_P3369371	D	GPX3	glutathione peroxidase 3	0.4	0.000574
A_24_P353905		MXRA8	matrix-remodelling associated 8	0.206	0.000576
A_24_P271363		CDS2	CDP-diacylglycerol synthase 2	0.179	0.000592
A_23_P137705		TBX19	T-box 19	0.215	0.000594
A_19_P00325768				0.148	0.000599
A_24_P16124		IFITM4P	interferon induced transmembrane protein 4 pseudogene	0.191	0.000604
A_33_P3366124		KANTR	KDM5C adjacent non-coding transcript	-0.195	0.000622
A_19_P00809682	D	EEF1A1	eukaryotic translation elongation factor 1 alpha 1	-0.219	0.000623
A_23_P79134		PLEKHF1	pleckstrin homology and FYVE domain containing 1	0.215	0.000625
A_33_P3262205		CPNE1	copine I	0.177	0.000642
A_32_P749354		EIF1AD	eukaryotic translation initiation factor 1A domain containing	0.153	0.000643
A_23_P13873		MLF2	myeloid leukemia factor 2	0.17	0.000664
A_23_P112159		AGO2	argonaute 2, RISC catalytic component	-0.209	0.000673
A_24_P99216		LRP10	LDL receptor related protein 10	0.163	0.000678
A_33_P3252333	D	SNORD3B-1	small nucleolar RNA, C/D box 3B-1	-0.487	0.000686
A_33_P3351416	D	SMOC2	SPARC related modular calcium binding 2	0.357	0.000697
A_33_P3263523		C1orf35	chromosome 1 open reading frame 35	-0.218	0.000716
A_23_P123916		LRSAM1	leucine rich repeat and sterile alpha motif containing 1	0.204	0.000721
A_23_P207387		GHDC	GH3 domain containing	0.241	0.000723
A_23_P307310		ACAN	aggrecan	-0.508	0.000726
A_33_P3316878		CHPF	chondroitin polymerizing factor	0.193	0.000741
A_33_P3280044	D	ANKRD11	ankyrin repeat domain 11	-0.264	0.000751
A_23_P73660		TRAPPC2	trafficking protein particle complex 2	0.171	0.000761
A_33_P3259821		DOCK9	dedicator of cytokinesis 9	0.293	0.000774
A_33_P3279708		RNU2-1	RNA, U2 small nuclear 1	0.312	0.00078
A_33_P3316505		SNORA73A	small nucleolar RNA, H/ACA box 73A	-0.338	0.000799
A_23_P61406		SHC3	SHC (Src homology 2 domain containing) transforming protein 3	0.247	0.0008
A_23_P170453		CST5	cystatin D	0.238	0.00081
A_23_P99063		LUM	lumican	0.239	0.000826
A_24_P186346	D	ANAPC1	anaphase promoting complex subunit 1	0.228	0.000835
A_24_P364807		LPCAT2	lysophosphatidylcholine acyltransferase 2	0.292	0.000882
A_23_P103282		TMEM59	transmembrane protein 59	0.122	0.000895
A_33_P3294031		KCNQ1OT1	KCNQ1 opposite strand/antisense transcript 1 (non-protein coding)	0.348	0.0009
A_23_P4161	D	ARSG	arylsulfatase G	0.263	0.000924
A_23_P77066		SNRPN	small nuclear ribonucleoprotein polypeptide N	0.166	0.000925
A_23_P35148		TAF13	TATA-box binding protein associated factor 13	0.225	0.00095
A_24_P161959		TMEM179B	transmembrane protein 179B	0.163	0.000957
A_23_P367676		SIN3A	SIN3 transcription regulator family member A	0.177	0.000971
A_23_P415652		GALNT12	polypeptide N-acetylgalactosaminyltransferase 12	0.221	0.000991
A_33_P3265290		RPL24	ribosomal protein L24	-0.162	0.000994
A_23_P376599		RALBP1	ralA binding protein 1	0.155	0.00101
A_23_P81241		NDFIP1	Nedd4 family interacting protein 1	0.119	0.00102
A_23_P92928		C6	complement component 6	-0.258	0.00103
A_33_P3354940	D	CSF1	colony stimulating factor 1	0.169	0.00104
A_33_P3221284		CCDC80	coiled-coil domain containing 80	0.213	0.00105
A_23_P130919		MOB3A	MOB kinase activator 3A	0.122	0.00105
A_23_P68072		WDR54	WD repeat domain 54	0.182	0.00106
A_23_P16275		TSKS	testis-specific serine kinase substrate	0.306	0.00108
A_21_P0004480				0.333	0.0011
A_23_P300033		PDGFRA	platelet derived growth factor receptor alpha	0.206	0.00116
A_33_P3290338		PARP1	poly(ADP-ribose) polymerase 1	-0.22	0.00116
A_33_P3244872		CEP350	centrosomal protein 350kDa	-0.201	0.00126
A_23_P25873		WDHD1	WD repeat and HMG-box DNA binding protein 1	-0.182	0.00126
A_23_P202720		SLC35C1	solute carrier family 35 (GDP-fucose transporter), member C1	0.164	0.0013
A_21_P0012537				-0.192	0.00132
A_21_P0005818		LINC01605	long intergenic non-protein coding RNA 1605	0.273	0.00133
A_24_P232790		CCDC177	coiled-coil domain containing 177	0.482	0.00133
A_33_P3230478	D	C1S	complement component 1, s subcomponent	0.211	0.00134
A_23_P501822		JUP	junction plakoglobin	-0.26	0.00136
A_23_P61127		APOO	apolipoprotein O	-0.173	0.00138
A_23_P71591		NOL8	nucleolar protein 8	-0.162	0.00139
A_23_P142631		FKBP1B	FK506 binding protein 1B	0.183	0.0014
A_33_P3278407		MLLT4	myeloid/lymphoid or mixed-lineage leukemia; translocated to, 4	-0.196	0.0014
A_24_P169574		YWHAEP1	tyrosine 3-monooxygenase/tryptophan 5-monooxygenase activation protein, epsilon pseudogene 1	0.176	0.0014
A_23_P397293		LY6K	lymphocyte antigen 6 complex, locus K	-0.338	0.00141
A_24_P49383		AAMDC	adipogenesis associated, Mth938 domain containing	0.12	0.00143
A_23_P259292		C1QTNF5	C1q and tumor necrosis factor related protein 5	0.27	0.00144
A_24_P287043		IFITM2	interferon induced transmembrane protein 2	0.171	0.00144
A_23_P14948	D	MBTPS1	membrane bound transcription factor peptidase, site 1	0.139	0.00144
A_23_P48740		DIO2	deiodinase, iodothyronine, type II	0.305	0.00145
A_21_P0006516		LINC00629	long intergenic non-protein coding RNA 629	0.255	0.00146
A_23_P58328		ANXA10	annexin A10	-0.288	0.00152
A_23_P129856		HIC1	hypermethylated in cancer 1	0.227	0.00152
A_23_P201238		SNX27	sorting nexin family member 27	0.16	0.00153
A_24_P98975		ANKRD13A	ankyrin repeat domain 13A	0.165	0.00157
A_23_P121926	D	SEPP1	selenoprotein P, plasma, 1	0.22	0.00163
A_33_P3326046	D	RNF167	ring finger protein 167	0.165	0.00166
A_23_P55873		CC2D1A	coiled-coil and C2 domain containing 1A	0.152	0.00167
A_33_P3340014		TRO	trophinin	0.3	0.00176
A_33_P3648597		LOC283075	uncharacterized LOC283075	0.16	0.00179
A_33_P3296940		FNDC3B	fibronectin type III domain containing 3B	0.169	0.0018
A_23_P123563		RPS6	ribosomal protein S6	-0.143	0.0018
A_23_P48237		MCRS1	microspherule protein 1	0.162	0.00183
A_23_P399501		PKM	pyruvate kinase, muscle	0.152	0.00183
A_23_P170857		IL1RAP	interleukin 1 receptor accessory protein	0.162	0.00184
A_23_P27515		PLD3	phospholipase D family member 3	0.165	0.00184
A_23_P144778		CKMT2	creatine kinase, mitochondrial 2	-0.238	0.00187
A_23_P316960		GRINA	glutamate receptor, ionotropic, N-methyl D-aspartate-associated protein 1 (glutamate binding)	0.143	0.00187
A_23_P3982		MIEN1	migration and invasion enhancer 1	0.14	0.00187
A_33_P3315060		ZC3H11A	zinc finger CCCH-type containing 11A	0.157	0.00187
A_33_P3248394	D	INMT	indolethylamine N-methyltransferase	0.451	0.00188
A_23_P325726		ACOT11	acyl-CoA thioesterase 11	0.478	0.00195
A_23_P126757		INTS3	integrator complex subunit 3	0.249	0.00196
A_33_P3321432		FAM198B	family with sequence similarity 198 member B	0.242	0.00199
A_33_P3708413		MFAP5	microfibrillar associated protein 5	0.226	0.002
A_23_P53162		STIM1	stromal interaction molecule 1	0.159	0.00203
A_23_P257043		GEM	GTP binding protein overexpressed in skeletal muscle	0.203	0.00204
A_23_P217079		DPM2	dolichyl-phosphate mannosyltransferase polypeptide 2, regulatory subunit	0.121	0.00207
A_21_P0001545				0.201	0.00213
A_23_P55468		TIMM22	translocase of inner mitochondrial membrane 22 homolog (yeast)	0.111	0.00213
A_33_P3230876		ALG11	ALG11, alpha-1,2-mannosyltransferase	-0.203	0.00215
A_23_P57059		STAU1	staufen double-stranded RNA binding protein 1	0.131	0.00215
A_23_P209805		NAB1	NGFI-A binding protein 1	0.22	0.00217
A_23_P252808		WBP1	WW domain binding protein 1	0.151	0.00217
A_23_P54179		ZNF410	zinc finger protein 410	0.156	0.00217
A_23_P106694		CHMP1A	charged multivesicular body protein 1A	0.146	0.00218
A_23_P44166		DCXR	dicarbonyl/L-xylulose reductase	0.201	0.00222
A_23_P108835		YPEL5	yippee like 5	0.128	0.00223
A_33_P3358745	D	SEPP1	selenoprotein P, plasma, 1	0.221	0.00225
A_19_P00323413		PTPN14	protein tyrosine phosphatase, non-receptor type 14	-0.192	0.00226
A_24_P276816		RCOR3	REST corepressor 3	0.174	0.00227
A_23_P217015		SET	SET nuclear proto-oncogene	-0.35	0.00228
A_23_P215787		HBP1	HMG-box transcription factor 1	0.171	0.0023
A_23_P94319		KBTBD11	kelch repeat and BTB (POZ) domain containing 11	-0.192	0.00231
A_33_P3220565		UBTD2	ubiquitin domain containing 2	0.145	0.00231
A_33_P3325661		IL23A	interleukin 23 subunit alpha	-0.304	0.00233
A_23_P250462		ATP6AP1	ATPase, H+ transporting, lysosomal accessory protein 1	0.15	0.00236
A_23_P67648		CAPNS1	calpain, small subunit 1	0.141	0.00236
A_23_P309361		HENMT1	HEN1 methyltransferase homolog 1 (Arabidopsis)	0.129	0.00237
A_23_P128956		ZFYVE1	zinc finger, FYVE domain containing 1	0.152	0.00238
A_33_P3346098	D	TAOK2	TAO kinase 2	0.169	0.00239
A_23_P251593		RPL10A	ribosomal protein L10a	-0.173	0.00248
A_23_P58482		MGAT1	mannosyl (alpha-1,3-)-glycoprotein beta-1,2-N-acetylglucosaminyltransferase	0.121	0.00252
A_23_P331479		PPP1R18	protein phosphatase 1 regulatory subunit 18	0.114	0.00254
A_32_P186981		RPL17	ribosomal protein L17	-0.175	0.00256
A_33_P3284108		NSF	N-ethylmaleimide sensitive factor	0.181	0.00262
A_23_P100795		STAT3	signal transducer and activator of transcription 3 (acute-phase response factor)	0.143	0.00269
A_23_P77103		SORD	sorbitol dehydrogenase	-0.18	0.00269
A_23_P149852		LZTS2	leucine zipper, putative tumor suppressor 2	0.145	0.00278
A_33_P3214665		MAP2	microtubule associated protein 2	-0.281	0.00278
A_23_P210554		SPATA2	spermatogenesis associated 2	0.213	0.00278
A_33_P3416762		LYPLA1	lysophospholipase I	-0.13	0.00281
A_24_P396702	D	CD302	CD302 molecule	0.198	0.00282
A_33_P3397579		LINC01602	long intergenic non-protein coding RNA 1602	0.188	0.00284
A_32_P148710		CFL1	cofilin 1 (non-muscle)	0.18	0.00286
A_33_P3349546		DCAF17	DDB1 and CUL4 associated factor 17	0.164	0.00287
A_23_P30813		HIST1H4K	histone cluster 1, H4k	-0.134	0.00289
A_24_P79153		SCAMP4	secretory carrier membrane protein 4	0.204	0.00289
A_23_P24077		C10orf54	chromosome 10 open reading frame 54	0.189	0.00291
A_23_P122662		GFOD1	glucose-fructose oxidoreductase domain containing 1	-0.182	0.00292
A_23_P92614		HELQ	helicase, POLQ-like	0.169	0.00296
A_23_P103201		PNRC2	proline rich nuclear receptor coactivator 2	0.15	0.00296
A_23_P125348		TRAPPC1	trafficking protein particle complex 1	0.157	0.00297
A_24_P414371		PPP3CA	protein phosphatase 3, catalytic subunit, alpha isozyme	-0.134	0.00308
A_23_P39237		ZFP36	ZFP36 ring finger protein	0.193	0.00308
A_33_P3416772	D	C1orf159	chromosome 1 open reading frame 159	0.194	0.00309
A_23_P65174		PHF11	PHD finger protein 11	0.182	0.00309
A_33_P3330549		SLC44A2	solute carrier family 44 (choline transporter), member 2	0.126	0.00309
A_23_P79836		SERINC3	serine incorporator 3	0.143	0.00313
A_32_P184488		PHLDB3	pleckstrin homology-like domain, family B, member 3	-0.195	0.00314
A_33_P3394972		OSBPL5	oxysterol binding protein like 5	0.257	0.00315
A_33_P3252394		GADD45G	growth arrest and DNA damage inducible gamma	-0.237	0.00316
A_33_P3406623	D	TNFSF12	tumor necrosis factor superfamily member 12	0.203	0.00316
A_23_P78835		ZNF787	zinc finger protein 787	0.172	0.00321
A_33_P3399114		CENPBD1P1	CENPB DNA-binding domains containing 1 pseudogene 1	0.167	0.00322
A_33_P3411397		SLC25A6	solute carrier family 25 (mitochondrial carrier; adenine nucleotide translocator), member 6	-0.175	0.00322
A_23_P211748		GTF2E1	general transcription factor IIE subunit 1	0.124	0.00323
A_24_P162287		CEP250	centrosomal protein 250kDa	-0.196	0.00325
A_23_P152115		NME3	NME/NM23 nucleoside diphosphate kinase 3	0.163	0.00325
A_19_P00804950				0.198	0.0033
A_33_P3328666		CLTB	clathrin, light chain B	0.204	0.0033
A_21_P0014252		ZEB1-AS1	ZEB1 antisense RNA 1	0.172	0.00333
A_23_P17204	D	ANAPC1	anaphase promoting complex subunit 1	-0.133	0.0034
A_23_P73142		TACO1	translational activator of mitochondrially encoded cytochrome c oxidase I	0.14	0.00343
A_23_P334709	D	FKBP9	FK506 binding protein 9	0.167	0.00351
A_23_P88522		NMB	neuromedin B	-0.155	0.00352
A_24_P57528		SLC39A11	solute carrier family 39 member 11	0.146	0.00353
A_24_P410605		ROR1	receptor tyrosine kinase-like orphan receptor 1	0.207	0.00354
A_33_P3399943	D	RPS6KA2	ribosomal protein S6 kinase, 90kDa, polypeptide 2	0.179	0.00355
A_32_P172141		CDON	cell adhesion associated, oncogene regulated	0.152	0.00356
A_24_P343559		NTRK2	neurotrophic tyrosine kinase, receptor, type 2	0.264	0.00361
A_23_P34537		EPHX1	epoxide hydrolase 1, microsomal (xenobiotic)	0.241	0.00363
A_21_P0014842				0.309	0.00364
A_24_P128563		KPNA6	karyopherin alpha 6 (importin alpha 7)	0.137	0.00365
A_24_P133488		CDCA4	cell division cycle associated 4	0.146	0.00367
A_33_P3320082		NFIB	nuclear factor I/B	0.167	0.0037
A_21_P0000928		LOC115110	uncharacterized LOC115110	-0.294	0.0037
A_23_P314191		ZDHHC17	zinc finger, DHHC-type containing 17	0.136	0.00372
A_23_P408455		SLC25A36	solute carrier family 25 (pyrimidine nucleotide carrier), member 36	0.128	0.00373
A_19_P00321166		LOC100132356	uncharacterized LOC100132356	0.26	0.00373
A_33_P3232562		RBBP4	retinoblastoma binding protein 4	0.156	0.00375
A_23_P147888		RPLP2	ribosomal protein, large, P2	-0.126	0.00375
A_33_P3399935	D	RPS6KA2	ribosomal protein S6 kinase, 90kDa, polypeptide 2	0.136	0.00376
A_24_P13230		RAB6A	RAB6A, member RAS oncogene family	0.113	0.00381
A_33_P3386581		ANKRD40	ankyrin repeat domain 40	0.118	0.00382
A_23_P112397		FBXW5	F-box and WD repeat domain containing 5	0.119	0.00384
A_23_P60354		SMARCA2	SWI/SNF related, matrix associated, actin dependent regulator of chromatin, subfamily a, member 2	0.201	0.00384
A_24_P385313		PTPRF	protein tyrosine phosphatase, receptor type F	-0.231	0.00387
A_23_P138105		MED18	mediator complex subunit 18	0.162	0.00388
A_23_P153964		INHBB	inhibin beta B	0.206	0.0039
A_33_P3284453		SOGA3	SOGA family member 3	-0.276	0.00394
A_24_P142228		RPL13	ribosomal protein L13	-0.137	0.00401
A_33_P3397180		LOC100129324	uncharacterized LOC100129324	0.312	0.00403
A_24_P255218		MYO5A	myosin VA	-0.263	0.00405
A_32_P104746		ZFYVE28	zinc finger, FYVE domain containing 28	0.189	0.00405
A_23_P55421		CBX8	chromobox 8	0.188	0.00407
A_24_P124349		PDGFD	platelet derived growth factor D	0.161	0.00408
A_23_P158997		MIR3916	microRNA 3916	0.237	0.00409
A_23_P10911		PLBD2	phospholipase B domain containing 2	0.184	0.00414
A_24_P148235		RPS27	ribosomal protein S27	-0.137	0.00414
A_33_P3264577		DCTN1	dynactin subunit 1	0.163	0.00423
A_23_P137814		ATP6V0B	ATPase, H+ transporting, lysosomal 21kDa, V0 subunit b	0.114	0.00427
A_23_P69810		GPAT3	glycerol-3-phosphate acyltransferase 3	-0.266	0.00427
A_33_P3354945	D	CSF1	colony stimulating factor 1	0.204	0.00428
A_33_P3423941		IFITM1	interferon induced transmembrane protein 1	0.254	0.00428
A_24_P570583		ZNF542P	zinc finger protein 542, pseudogene	0.179	0.00428
A_23_P419107		TCP11L2	t-complex 11, testis-specific-like 2	0.194	0.00432
A_19_P00807615	D	EEF1A1	eukaryotic translation elongation factor 1 alpha 1	-0.213	0.00433
A_23_P14124		RASL11A	RAS-like family 11 member A	0.277	0.00434
A_33_P3417141		CCDC124	coiled-coil domain containing 124	0.125	0.00435
A_24_P39101		KCTD10	potassium channel tetramerization domain containing 10	0.181	0.00435
A_23_P105307		DGKA	diacylglycerol kinase alpha	0.166	0.00436
A_23_P394836	D	INF2	inverted formin, FH2 and WH2 domain containing	0.152	0.00436
A_23_P131935		FERMT1	fermitin family member 1	-0.231	0.00438
A_23_P258393		PPM1M	protein phosphatase, Mg2+/Mn2+ dependent 1M	0.228	0.00441
A_24_P117672		SCAF1	SR-related CTD-associated factor 1	0.201	0.00441
A_23_P147665		OLFML1	olfactomedin like 1	0.234	0.00443
A_33_P3251640		LINC00663	long intergenic non-protein coding RNA 663	0.291	0.00448
A_21_P0011001		PCSK7	proprotein convertase subtilisin/kexin type 7	0.187	0.0045
A_23_P153461		PLPPR2	phospholipid phosphatase related 2	0.158	0.00451
A_23_P141429		ABI3	ABI family member 3	0.204	0.00453
A_33_P3267745		C9orf69	chromosome 9 open reading frame 69	0.224	0.00453
A_33_P3302696		PPM1D	protein phosphatase, Mg2+/Mn2+ dependent 1D	0.225	0.00455
A_23_P37877		NARFL	nuclear prelamin A recognition factor-like	0.137	0.00458
A_33_P3390342		LOC100131257	zinc finger protein 655 pseudogene	0.174	0.00467
A_24_P381199		TRIM6	tripartite motif containing 6	0.16	0.00469
A_21_P0006279				0.332	0.0047
A_23_P21324		TWIST2	twist family bHLH transcription factor 2	0.232	0.0047
A_23_P349882		PDCL	phosducin like	0.156	0.00471
A_23_P6099		PLCB1	phospholipase C beta 1	-0.219	0.00474
A_21_P0000742		MYLK-AS1	MYLK antisense RNA 1	-0.182	0.00475
A_33_P3243907		CTSD	cathepsin D	0.142	0.00477
A_24_P185186		SAMD14	sterile alpha motif domain containing 14	0.187	0.00479
A_24_P101561				-0.161	0.00482
A_24_P115774		BIRC2	baculoviral IAP repeat containing 2	0.129	0.00482
A_23_P136232		IMPAD1	inositol monophosphatase domain containing 1	0.156	0.00483
A_23_P402751		MT-CO2	cytochrome c oxidase subunit II	0.191	0.00484
A_24_P354615		MTMR12	myotubularin related protein 12	0.172	0.00484
A_23_P164797		ZNF580	zinc finger protein 580	0.19	0.00489
A_33_P3314386		TOR1AIP1	torsin A interacting protein 1	0.174	0.00492
A_32_P123088		TMED7-TICAM2	TMED7-TICAM2 readthrough	0.128	0.00496
A_23_P131435	D	CD302	CD302 molecule	0.178	0.00498
A_23_P19624		BMP6	bone morphogenetic protein 6	-0.177	0.00501
A_23_P202750		C11orf54	chromosome 11 open reading frame 54	0.152	0.00502
A_21_P0012564				-0.137	0.00503
A_24_P320254		HNRNPH1	heterogeneous nuclear ribonucleoprotein H1 (H)	0.149	0.00511
A_24_P129232		SERINC1	serine incorporator 1	0.162	0.00511
A_21_P0006135				-0.312	0.00512
A_23_P251421		CDCA7	cell division cycle associated 7	-0.251	0.00513
A_23_P5131		ISYNA1	inositol-3-phosphate synthase 1	0.184	0.00514
A_23_P6869		TMEM115	transmembrane protein 115	0.157	0.00514
A_23_P138168		CNN3	calponin 3, acidic	0.154	0.00518
A_33_P3385842		CCDC7	coiled-coil domain containing 7	0.202	0.0052
A_23_P90143		RPL13A	ribosomal protein L13a	-0.133	0.0053
A_21_P0007566				0.472	0.00531
A_23_P141362		FZD2	frizzled class receptor 2	0.139	0.00534
A_24_P324405	D	ANKRD11	ankyrin repeat domain 11	-0.264	0.00537
A_19_P00315668		HIPK2	homeodomain interacting protein kinase 2	-0.216	0.00541
A_23_P37415		SECISBP2L	SECIS binding protein 2-like	0.147	0.00543
A_21_P0012454		PTPN11	protein tyrosine phosphatase, non-receptor type 11	-0.231	0.00545
A_23_P3956		C1QTNF1	C1q and tumor necrosis factor related protein 1	0.236	0.00548
A_21_P0000276		SNORD87	small nucleolar RNA, C/D box 87	0.178	0.0055
A_23_P160828	D	C1orf159	chromosome 1 open reading frame 159	0.201	0.00555
A_33_P3218148	D	C5orf42	chromosome 5 open reading frame 42	0.2	0.00556
A_23_P56404		EN1	engrailed homeobox 1	0.171	0.00558
A_24_P151727		NONO	non-POU domain containing, octamer-binding	0.12	0.00558
A_23_P138835		CAPN1	calpain 1, (mu/I) large subunit	0.16	0.00564
A_23_P208706		BAX	BCL2-associated X protein	-0.359	0.00566
A_33_P3373459		CHST12	carbohydrate (chondroitin 4) sulfotransferase 12	0.138	0.00569
A_33_P3382538		JRKL	JRK-like	0.184	0.00573
A_23_P85015		MAOB	monoamine oxidase B	0.182	0.00573
A_33_P3342957		STK17B	serine/threonine kinase 17b	0.222	0.00574
A_33_P3302245		TMEM59L	transmembrane protein 59 like	0.164	0.00576
A_21_P0007572				-0.241	0.00579
A_33_P3390918		FSD2	fibronectin type III and SPRY domain containing 2	-0.396	0.0058
A_33_P3329916		RPL6	ribosomal protein L6	-0.138	0.00581
A_23_P156319		LARP1	La ribonucleoprotein domain family member 1	-0.103	0.00582
A_23_P125423		C1R	complement component 1, r subcomponent	0.182	0.00584
A_33_P3375910				0.259	0.0059
A_33_P3385461		BRCC3	BRCA1/BRCA2-containing complex subunit 3	-0.186	0.00592
A_23_P308032		NUP98	nucleoporin 98kDa	0.186	0.00592
A_19_P00317789		LOC93622	Morf4 family associated protein 1-like 1 pseudogene	0.115	0.00595
A_32_P191786		ANKRD24	ankyrin repeat domain 24	0.156	0.00597
A_23_P331700		SRRM3	serine/arginine repetitive matrix 3	0.237	0.00598
A_23_P101960		ZFP36L2	ZFP36 ring finger protein-like 2	0.212	0.006
A_23_P16116		RAB4B	RAB4B, member RAS oncogene family	0.171	0.00601
A_21_P0005785				0.522	0.00606
A_33_P3215178	D	PIGQ	phosphatidylinositol glycan anchor biosynthesis class Q	0.145	0.00606
A_24_P419276		ZNF248	zinc finger protein 248	0.173	0.00607
A_32_P52785		DAAM2	dishevelled associated activator of morphogenesis 2	0.237	0.0061
A_33_P3298960		KDELC2	KDEL motif containing 2	0.241	0.0061
A_23_P126266		HLX	H2.0-like homeobox	0.194	0.00611
A_23_P55880		ZNF564	zinc finger protein 564	0.171	0.00611
A_33_P3273298		ZNF813	zinc finger protein 813	0.137	0.00613
A_33_P3220919		ADRBK2	adrenergic, beta, receptor kinase 2	-0.226	0.00626
A_23_P104762		YAP1	Yes associated protein 1	0.103	0.00629
A_24_P19175		ZNF358	zinc finger protein 358	0.163	0.00631
A_33_P3226832		F3	coagulation factor III, tissue factor	0.186	0.00634
A_23_P136325		WIPF2	WAS/WASL interacting protein family member 2	0.194	0.00637
A_21_P0013756				0.181	0.00638
A_33_P3255354		NT5C2	5'-nucleotidase, cytosolic II	0.25	0.00642
A_24_P228026		CYB5D2	cytochrome b5 domain containing 2	0.148	0.00642
A_24_P38815		TPP1	tripeptidyl peptidase I	0.199	0.00645
A_33_P3353552		SLC48A1	solute carrier family 48 (heme transporter), member 1	0.121	0.00648
A_24_P941487		ZNF761	zinc finger protein 761	0.155	0.00648
A_23_P39076		RRAS	related RAS viral (r-ras) oncogene homolog	0.149	0.00649
A_23_P312646		C9orf142	chromosome 9 open reading frame 142	0.128	0.0065
A_23_P22134		BNC1	basonuclin 1	0.146	0.00652
A_32_P25273		HSPD1	heat shock protein family D (Hsp60) member 1	-0.11	0.00652
A_33_P3215078		CS	citrate synthase	-0.147	0.00655
A_23_P107465		KRT31	keratin 31, type I	-0.28	0.00666
A_24_P133584		MFGE8	milk fat globule-EGF factor 8 protein	0.201	0.00667
A_33_P3331726		LINC00657	non-coding RNA activated by DNA damage	0.174	0.00671
A_33_P3393941	D	MBTPS1	membrane bound transcription factor peptidase, site 1	0.148	0.00674
A_24_P245298	D	TNFSF12	tumor necrosis factor superfamily member 12	0.182	0.00674
A_24_P101629		FAM127B	family with sequence similarity 127 member B	0.127	0.00679
A_21_P0000215		SNORD55	small nucleolar RNA, C/D box 55	0.224	0.00683
A_24_P389959		COPZ1	coatomer protein complex subunit zeta 1	0.138	0.00685
A_23_P319013		ZNF383	zinc finger protein 383	0.145	0.00685
A_23_P206760		HP	haptoglobin	-0.183	0.00686
A_33_P3257222		COMTD1	catechol-O-methyltransferase domain containing 1	-0.17	0.00688
A_33_P3254695	D	SNORA73B	small nucleolar RNA, H/ACA box 73B	-0.245	0.00691
A_24_P36745		CXorf38	chromosome X open reading frame 38	-0.122	0.00692
A_23_P161190		VIM	vimentin	-0.151	0.00693
A_23_P30745		MEA1	male-enhanced antigen 1	0.114	0.00694
A_33_P3217028		TM9SF1	transmembrane 9 superfamily member 1	0.134	0.00696
A_24_P125881		DGCR2	DiGeorge syndrome critical region gene 2	0.144	0.00698
A_24_P373152		CFL2	cofilin 2 (muscle)	-0.096	0.007
A_23_P43095		ZFHX4	zinc finger homeobox 4	-0.164	0.00712
A_23_P417383		ASPRV1	aspartic peptidase, retroviral-like 1	0.197	0.00713
A_23_P204696		CDKN1B	cyclin-dependent kinase inhibitor 1B (p27, Kip1)	0.149	0.00714
A_23_P58983		TBC1D22B	TBC1 domain family member 22B	0.2	0.00717
A_24_P933011		TMEM200C	transmembrane protein 200C	0.197	0.00726
A_23_P59616		GTF2IRD2/GTF2IRD2B	GTF2I repeat domain containing 2	0.173	0.00728
A_23_P385861		CDCA2	cell division cycle associated 2	-0.197	0.00731
A_23_P111005		YIPF3	Yip1 domain family member 3	0.107	0.00732
A_21_P0008855				0.23	0.00734
A_19_P00808320	D	EEF1A1	eukaryotic translation elongation factor 1 alpha 1	-0.158	0.00737
A_23_P89902		RTN2	reticulon 2	0.208	0.00738
A_23_P17914		PNPLA3	patatin like phospholipase domain containing 3	-0.319	0.00739
A_23_P310		MARCKSL1	MARCKS-like 1	0.21	0.00742
A_33_P3290567		WEE1	WEE1 G2 checkpoint kinase	0.177	0.00744
A_23_P96976		ZCCHC17	zinc finger, CCHC domain containing 17	-0.19	0.00746
A_23_P71821		PBX3	pre-B-cell leukemia homeobox 3	0.153	0.00749
A_33_P3326432		SEPW1	selenoprotein W, 1	0.136	0.0075
A_24_P195724				-0.155	0.00751
A_33_P3409154		SLC22A23	solute carrier family 22 member 23	-0.221	0.00753
A_23_P81650		C5orf15	chromosome 5 open reading frame 15	0.176	0.00754
A_23_P356484		RPS10	ribosomal protein S10	-0.145	0.00755
A_23_P141656		DRG2	developmentally regulated GTP binding protein 2	0.099	0.00759
A_23_P41872		B4GALT7	xylosylprotein beta 1,4-galactosyltransferase, polypeptide 7	0.12	0.00759
A_24_P184305		BBS1	Bardet-Biedl syndrome 1	0.168	0.00761
A_23_P117778		UBL7	ubiquitin like 7	0.144	0.00761
A_23_P22499		GNL3L	guanine nucleotide binding protein-like 3 (nucleolar)-like	0.186	0.00763
A_23_P132248		ZMAT5	zinc finger, matrin-type 5	0.152	0.00763
A_23_P86100		KLHDC9	kelch domain containing 9	0.233	0.00766
A_21_P0014773				0.322	0.0077
A_23_P345591		PSMA2	proteasome subunit alpha 2	0.117	0.0077
A_23_P156880		ENPP1	ectonucleotide pyrophosphatase/phosphodiesterase 1	0.192	0.00771
A_23_P143190		MYBL2	v-myb avian myeloblastosis viral oncogene homolog-like 2	-0.229	0.00772
A_24_P63262		RPN1	ribophorin I	0.16	0.00773
A_33_P3410449		SCARF2	scavenger receptor class F member 2	0.231	0.00774
A_21_P0011656		PKD1P1	polycystic kidney disease 1 (autosomal dominant) pseudogene 1	0.256	0.00775
A_33_P3234667		ZKSCAN1	zinc finger with KRAB and SCAN domains 1	-0.185	0.00775
A_33_P3211520		SNAP47	synaptosome associated protein 47kDa	0.144	0.00779
A_24_P219920		FEM1A	fem-1 homolog a (C. elegans)	0.167	0.00786
A_23_P83028		RECK	reversion-inducing-cysteine-rich protein with kazal motifs	0.13	0.00786
A_33_P3355014		TMEM229B	transmembrane protein 229B	0.18	0.00786
A_23_P100486		VKORC1	vitamin K epoxide reductase complex subunit 1	0.139	0.00791
A_24_P217330		POMGNT2	protein O-linked mannose N-acetylglucosaminyltransferase 2 (beta 1,4-)	0.166	0.00793
A_23_P98167		UNC93B1	unc-93 homolog B1 (C. elegans)	0.207	0.00794
A_23_P336992		ZFAND2A	zinc finger, AN1-type domain 2A	0.18	0.00795
A_23_P250380		MAN2B2	mannosidase, alpha, class 2B, member 2	0.169	0.00796
A_19_P00323022		LINC00963	long intergenic non-protein coding RNA 963	0.175	0.00797
A_33_P3310293		PKIG	protein kinase (cAMP-dependent, catalytic) inhibitor gamma	-0.181	0.00802
A_33_P3347417		SPEN	spen family transcriptional repressor	-0.19	0.00802
A_23_P404094		THAP7-AS1	THAP7 antisense RNA 1	0.145	0.00802
A_33_P3408632		LMF2	lipase maturation factor 2	0.157	0.00804
A_23_P502609	D	PIGQ	phosphatidylinositol glycan anchor biosynthesis class Q	0.129	0.0081
A_23_P71981		ERAL1	Era-like 12S mitochondrial rRNA chaperone 1	0.144	0.0082
A_33_P3264815		TLN2	talin 2	-0.137	0.0082
A_24_P787947		YPEL2	yippee like 2	0.145	0.00823
A_23_P44139		PRIM2	primase, DNA, polypeptide 2 (58kDa)	0.131	0.00826
A_23_P368126		AHCYL1	adenosylhomocysteinase like 1	0.148	0.00827
A_23_P145935		EPHB6	EPH receptor B6	0.241	0.00828
A_23_P77779		RPL19	ribosomal protein L19	-0.13	0.00835
A_23_P70968		HOXA7	homeobox A7	-0.304	0.00837
A_23_P2492	D	C1S	complement component 1, s subcomponent	0.174	0.00838
A_23_P205074		SLC46A3	solute carrier family 46 member 3	0.158	0.00838
A_23_P120237		STARD7	StAR related lipid transfer domain containing 7	0.169	0.00838
A_24_P304449		MLEC	malectin	0.167	0.00839
A_24_P119609		MYO1D	myosin ID	0.232	0.00842
A_33_P3345132		ZNF578	zinc finger protein 578	-0.225	0.00845
A_24_P202581		ARHGEF1	Rho guanine nucleotide exchange factor 1	0.182	0.00846
A_23_P200239		YIPF1	Yip1 domain family member 1	0.184	0.00846
A_33_P3380693		ADAM15	ADAM metallopeptidase domain 15	-0.216	0.00847
A_23_P75380		AIP	aryl hydrocarbon receptor interacting protein	0.101	0.0085
A_23_P254081		LIAS	lipoic acid synthetase	-0.152	0.0085
A_23_P141520		C17orf49	chromosome 17 open reading frame 49	0.144	0.00853
A_33_P3340342		CMTM3	CKLF-like MARVEL transmembrane domain containing 3	0.139	0.00853
A_21_P0000748		TCEB3-AS1	TCEB3 antisense RNA 1	-0.181	0.00855
A_23_P84629		RFNG	RFNG O-fucosylpeptide 3-beta-N-acetylglucosaminyltransferase	0.16	0.00856
A_23_P113283		ZMAT3	zinc finger, matrin-type 3	0.149	0.0086
A_33_P3530314	D	C5orf42	chromosome 5 open reading frame 42	0.128	0.00861
A_23_P128613		KDELC1	KDEL motif containing 1	0.125	0.00863
A_24_P236522		CD2BP2	CD2 (cytoplasmic tail) binding protein 2	0.135	0.00865
A_23_P391396		EBF3	early B-cell factor 3	0.144	0.00868
A_21_P0010399				-0.349	0.00869
A_23_P84836		NPEPPS	aminopeptidase puromycin sensitive	0.119	0.00869
A_19_P00808852		KTN1-AS1	KTN1 antisense RNA 1	-0.191	0.00878
A_23_P149992		PDLIM1	PDZ and LIM domain 1	0.182	0.00887
A_23_P357985		RGPD4 (includes others)	RANBP2-like and GRIP domain containing 5	0.177	0.00889
A_23_P156732		PHF1	PHD finger protein 1	0.175	0.00891
A_24_P256307		ARF3	ADP ribosylation factor 3	0.12	0.009
A_23_P156049		HEXB	hexosaminidase B (beta polypeptide)	0.166	0.00901
A_32_P180210		FAM35A	family with sequence similarity 35 member A	0.147	0.00902
A_23_P141680		BCAS3	breast carcinoma amplified sequence 3	0.218	0.0091
A_33_P3260572		CLIP4	CAP-Gly domain containing linker protein family member 4	0.151	0.0091
A_24_P261417		DKK3	dickkopf WNT signaling pathway inhibitor 3	0.245	0.00914
A_24_P152188		PRICKLE2	prickle planar cell polarity protein 2	0.125	0.00914
A_23_P500271		IRF5	interferon regulatory factor 5	0.34	0.00921
A_23_P420610		FCHO2	FCH domain only 2	0.178	0.00922
A_23_P308021		CABP4	calcium binding protein 4	-0.286	0.00923
A_33_P3339375		ARHGAP11B	Rho GTPase activating protein 11B	0.182	0.00924
A_23_P359636		BROX	BRO1 domain and CAAX motif containing	0.172	0.00925
A_23_P104438		MYPN	myopalladin	-0.18	0.00927
A_23_P84952		TFE3	transcription factor binding to IGHM enhancer 3	0.15	0.00927
A_23_P85703		SOX13	SRY-box 13	0.194	0.0093
A_21_P0009305				0.296	0.00932
A_23_P15073		JMJD8	jumonji domain containing 8	0.157	0.00933
A_21_P0001360				0.168	0.00934
A_24_P299685		PDPN	podoplanin	0.264	0.00937
A_33_P3349591		LOC100129461	LYRM4 antisense RNA 1	0.177	0.00942
A_33_P3343290		PPTC7	PTC7 protein phosphatase homolog	0.193	0.00943
A_23_P500734		POGZ	pogo transposable element with ZNF domain	0.149	0.00949
A_24_P361167		CHD8	chromodomain helicase DNA binding protein 8	0.12	0.00956
A_23_P69521		CCNI	cyclin I	-0.113	0.00958
A_21_P0000351		SCARNA22	small Cajal body-specific RNA 22	-0.187	0.00959
A_23_P8539		DAGLB	diacylglycerol lipase, beta	0.151	0.00962
A_32_P175301		DENND3	DENN/MADD domain containing 3	-0.16	0.00965
A_33_P3379967		HLA-F	major histocompatibility complex, class I, F	0.195	0.00965
A_23_P57417		MMP11	matrix metallopeptidase 11	0.198	0.00965
A_21_P0009655		MGC45922	uncharacterized LOC284365	-0.302	0.00965
A_33_P3232937		GNG12-AS1	GNG12 antisense RNA 1	-0.198	0.00969
A_23_P141960		SERTAD3	SERTA domain containing 3	0.169	0.0097
A_23_P74449		HPDL	4-hydroxyphenylpyruvate dioxygenase-like	-0.191	0.00973
A_23_P217208		SLC35A2	solute carrier family 35 (UDP-galactose transporter), member A2	0.155	0.00973
A_33_P3381816		INVS	inversin	0.178	0.00975
A_21_P0013977		PCID2	PCI domain containing 2	-0.273	0.00976
A_33_P3229789				-0.181	0.00979
A_33_P3355230		LAIR1	leukocyte-associated immunoglobulin-like receptor 1	-0.361	0.0098
A_24_P95822		NPTN	neuroplastin	0.134	0.0098
A_33_P3413855		C7orf60	chromosome 7 open reading frame 60	0.216	0.00983
A_33_P3371320		BRE	brain and reproductive organ-expressed (TNFRSF1A modulator)	0.129	0.00994
A_23_P372308		RGMA	repulsive guidance molecule family member a	0.24	0.00994
A_33_P3279545		HIPK3	homeodomain interacting protein kinase 3	0.156	0.00997
A_23_P97932		MSRB2	methionine sulfoxide reductase B2	0.098	0.00997
A_23_P330895		NFKBIB	nuclear factor of kappa light polypeptide gene enhancer in B-cells inhibitor, beta	0.122	0.00999
A_23_P112311		TRIM32	tripartite motif containing 32	0.127	0.01
A_32_P110872		GGACT	gamma-glutamylamine cyclotransferase	-0.131	0.0101
A_33_P3264955				-0.115	0.0102
A_33_P3272165		NDUFAF6	NADH:ubiquinone oxidoreductase complex assembly factor 6	-0.134	0.0102
A_33_P3522525		GRPEL1	GrpE-like 1, mitochondrial (E. coli)	-0.13	0.0103
A_23_P258698		MANBA	mannosidase, beta A, lysosomal	0.111	0.0103
A_23_P209694		PAPOLG	poly(A) polymerase gamma	0.121	0.0103
A_21_P0000428		SNORD114-31	small nucleolar RNA, C/D box 114-31	0.184	0.0104
A_24_P278367		ACTR1A	ARP1 actin-related protein 1 homolog A, centractin alpha (yeast)	0.117	0.0104
A_23_P128094		ABCB9	ATP binding cassette subfamily B member 9	0.24	0.0104
A_23_P115064		CRABP2	cellular retinoic acid binding protein 2	0.308	0.0104
A_23_P41976		CCDC127	coiled-coil domain containing 127	0.145	0.0105
A_33_P3313595		CDK11B	cyclin-dependent kinase 11B	-0.154	0.0105
A_32_P49616		EEF1B2	eukaryotic translation elongation factor 1 beta 2	-0.14	0.0105
A_23_P22350		GRAMD3	GRAM domain containing 3	0.251	0.0105
A_33_P3357858		ZNF815P	zinc finger protein 815, pseudogene	0.185	0.0105
A_33_P3375668				-0.142	0.0106
A_24_P298174		CBX1	chromobox 1	-0.149	0.0106
A_23_P166826		DCP1A	decapping mRNA 1A	-0.086	0.0106
A_32_P133244		PARN	poly(A)-specific ribonuclease	0.144	0.0106
A_23_P150286		PSMA1	proteasome subunit alpha 1	0.098	0.0106
A_23_P201483		MAPKAPK2	mitogen-activated protein kinase-activated protein kinase 2	0.143	0.0107
A_23_P106973		SEPT9	septin 9	-0.286	0.0107
A_23_P65230		TMTC4	transmembrane and tetratricopeptide repeat containing 4	-0.163	0.0107
A_24_P256337		ZNF644	zinc finger protein 644	0.185	0.0107
A_23_P55936		FCGRT	Fc fragment of IgG receptor and transporter	0.157	0.0108
A_23_P35444		INA	internexin neuronal intermediate filament protein alpha	0.231	0.0108
A_24_P406006		LPCAT1	lysophosphatidylcholine acyltransferase 1	0.161	0.0108
A_33_P3284077		NUP133	nucleoporin 133kDa	0.209	0.0108
A_21_P0000484		SNORD76	small nucleolar RNA, C/D box 76	0.156	0.0109
A_23_P75609		CEP164	centrosomal protein 164kDa	0.171	0.0109
A_33_P3335386		FAM83G	family with sequence similarity 83 member G	-0.239	0.0109
A_33_P3224105		KNSTRN	kinetochore-localized astrin/SPAG5 binding protein	-0.113	0.0109
A_23_P116168		MSANTD4	Myb/SANT-like DNA-binding domain containing 4 with coiled-coils	0.106	0.0109
A_23_P79818		OSER1	oxidative stress responsive serine-rich 1	0.122	0.0109
A_23_P145584		UBE2H	ubiquitin conjugating enzyme E2H	0.097	0.0109
A_23_P166051		RBCK1	RanBP-type and C3HC4-type zinc finger containing 1	0.147	0.011
A_23_P97623		RRAGC	Ras-related GTP binding C	-0.146	0.011
A_33_P3293573		VPS37D	vacuolar protein sorting 37 homolog D (S. cerevisiae)	0.105	0.011
A_23_P433079		DNAJC14	DnaJ heat shock protein family (Hsp40) member C14	0.122	0.0111
A_23_P312610		DNAJC4	DnaJ heat shock protein family (Hsp40) member C4	0.164	0.0111
A_23_P348121		FOSL2	FOS like antigen 2	0.17	0.0111
A_23_P476		MPZL1	myelin protein zero-like 1	0.161	0.0111
A_23_P69493		RHOA	ras homolog family member A	0.112	0.0111
A_24_P177353		THOC2	THO complex 2	0.12	0.0111
A_33_P3268408				0.137	0.0112
A_23_P376870		C14orf79	chromosome 14 open reading frame 79	0.162	0.0112
A_33_P3415211		MPV17	MpV17 mitochondrial inner membrane protein	0.127	0.0112
A_23_P154108		DYNC1I2	dynein, cytoplasmic 1, intermediate chain 2	0.113	0.0113
A_33_P3417820		NOL12	nucleolar protein 12	-0.182	0.0113
A_23_P393620		TFPI2	tissue factor pathway inhibitor 2	-0.262	0.0113
A_23_P214587		TRIM26	tripartite motif containing 26	0.122	0.0113
A_24_P924591		VEZF1	vascular endothelial zinc finger 1	0.146	0.0113
A_21_P0000240		SNORD100	small nucleolar RNA, C/D box 100	0.189	0.0114
A_33_P3270109		LEO1	LEO1 homolog, Paf1/RNA polymerase II complex component	-0.175	0.0114
A_33_P3210278		SYNE2	spectrin repeat containing, nuclear envelope 2	-0.166	0.0114
A_33_P3355407	D	SNORA73B	small nucleolar RNA, H/ACA box 73B	-0.245	0.0115
A_33_P3396159		CCDC6	coiled-coil domain containing 6	0.146	0.0115
A_33_P3421163		TP53INP1	tumor protein p53 inducible nuclear protein 1	0.185	0.0115
A_24_P385336		HIPK1	homeodomain interacting protein kinase 1	0.165	0.0116
A_24_P200023		IL1R1	interleukin 1 receptor, type I	0.184	0.0116
A_24_P132950		NAP1L4	nucleosome assembly protein 1-like 4	0.163	0.0116
A_33_P3314212		PARG	poly(ADP-ribose) glycohydrolase	0.188	0.0116
A_33_P3339376	D	WIPF1	WAS/WASL interacting protein family member 1	-0.202	0.0116
A_33_P3214027		SPECC1L	sperm antigen with calponin homology and coiled-coil domains 1-like	0.175	0.0117
A_23_P330616	D	WIPF1	WAS/WASL interacting protein family member 1	0.175	0.0117
A_23_P340922		ZNF414	zinc finger protein 414	0.176	0.0117
A_23_P355439		HIST1H2AA	histone cluster 1, H2aa	-0.16	0.0118
A_23_P346265		GNPTAB	N-acetylglucosamine-1-phosphate transferase, alpha and beta subunits	0.175	0.0118
A_33_P3334948				-0.225	0.0119
A_33_P3549874				0.169	0.0119
A_23_P394567		FAM234B	family with sequence similarity 234 member B	0.148	0.0119
A_33_P3361746		TRPS1	trichorhinophalangeal syndrome I	0.168	0.0119
A_19_P00811939		MAP3K13	mitogen-activated protein kinase kinase kinase 13	-0.121	0.012
A_21_P0002555				-0.213	0.0121
A_24_P62505		COLGALT2	collagen beta(1-O)galactosyltransferase 2	0.253	0.0121
A_19_P00320371		LOC101927151	uncharacterized LOC101927151	0.156	0.0121
A_21_P0012695				-0.305	0.0122
A_21_P0011712				-0.132	0.0122
A_23_P52101		CYB5R1	cytochrome b5 reductase 1	0.099	0.0122
A_24_P103686		GPAT4	glycerol-3-phosphate acyltransferase 4	0.159	0.0122
A_23_P88904		NTHL1	nth-like DNA glycosylase 1	0.134	0.0122
A_23_P81103		SFRP2	secreted frizzled-related protein 2	0.325	0.0122
A_24_P127312				-0.25	0.0124
A_21_P0005351				0.18	0.0125
A_33_P3310929		ADAM12	ADAM metallopeptidase domain 12	-0.53	0.0125
A_23_P19987		IGF2BP3	insulin like growth factor 2 mRNA binding protein 3	-0.153	0.0125
A_33_P3341509				0.114	0.0126
A_23_P24997		CDK4	cyclin-dependent kinase 4	0.14	0.0126
A_33_P3407266		GTF3C4	general transcription factor IIIC subunit 4	0.133	0.0126
A_19_P00325660		LOC401320	uncharacterized LOC401320	0.211	0.0126
A_33_P3392391		CPT1C	carnitine palmitoyltransferase 1C	0.161	0.0127
A_23_P61268		HGH1	HGH1 homolog	0.131	0.0127
A_23_P43810		LTBP1	latent transforming growth factor beta binding protein 1	-0.18	0.0127
A_19_P00318304		SNHG17	small nucleolar RNA host gene 17	-0.16	0.0128
A_21_P0000570		ADORA2A-AS1	ADORA2A antisense RNA 1	-0.287	0.0128
A_23_P57306		CHAF1B	chromatin assembly factor 1 subunit B	-0.151	0.0128
A_21_P0013638		KGFLP1	fibroblast growth factor 7 pseudogene	0.207	0.0128
A_23_P349928		SP100	SP100 nuclear antigen	0.089	0.0128
A_24_P28977		TRPC1	transient receptor potential cation channel, subfamily C, member 1	0.12	0.0128
A_23_P152406		CAPNS2	calpain, small subunit 2	0.159	0.0129
A_24_P70993		CD99	CD99 molecule	0.173	0.0129
A_23_P129334		CLCN7	chloride channel, voltage-sensitive 7	0.144	0.0129
A_24_P191971		SAP30L	SAP30-like	0.139	0.0129
A_23_P143535		WDR4	WD repeat domain 4	-0.282	0.0129
A_23_P129188		CALML4	calmodulin like 4	-0.224	0.013
A_33_P3413989	D	SERPING1	serpin peptidase inhibitor, clade G (C1 inhibitor), member 1	0.178	0.013
A_33_P3404651		TTC7A	tetratricopeptide repeat domain 7A	-0.155	0.013
A_23_P148057		ZDHHC9	zinc finger, DHHC-type containing 9	0.162	0.013
A_33_P3358295		ABTB1	ankyrin repeat and BTB (POZ) domain containing 1	0.148	0.0131
A_19_P00319201		CCDC149	coiled-coil domain containing 149	-0.16	0.0131
A_19_P00800467		CLEC2D	C-type lectin domain family 2 member D	-0.122	0.0131
A_33_P3267263		RNVU1-18	RNA, variant U1 small nuclear 18	0.23	0.0131
A_23_P20832		SPTAN1	spectrin alpha, non-erythrocytic 1	0.175	0.0131
A_21_P0012940				-0.142	0.0132
A_23_P373568		FUZ	fuzzy planar cell polarity protein	0.134	0.0132
A_23_P15864		MBD2	methyl-CpG binding domain protein 2	0.111	0.0132
A_33_P3409904	D	VAMP4	vesicle associated membrane protein 4	0.144	0.0132
A_23_P147199		ZNF271P	zinc finger protein 271, pseudogene	0.11	0.0132
A_23_P406702		CAMSAP2	calmodulin regulated spectrin associated protein family member 2	0.165	0.0133
A_23_P250813		WRN	Werner syndrome, RecQ helicase-like	-0.132	0.0133
A_19_P00322966		LINC01278	long intergenic non-protein coding RNA 1278	0.18	0.0134
A_23_P117683		HYPK	huntingtin interacting protein K	-0.08	0.0134
A_23_P34402		NCSTN	nicastrin	0.162	0.0134
A_23_P65386		OTUB2	OTU deubiquitinase, ubiquitin aldehyde binding 2	0.158	0.0134
A_23_P121637		PRSS12	protease, serine 12	-0.13	0.0134
A_24_P72750		SPIN1	spindlin 1	0.135	0.0135
A_23_P21092		CALB2	calbindin 2	-0.394	0.0136
A_33_P3213695		CAB39L	calcium binding protein 39 like	0.196	0.0136
A_24_P116378		GCOM1	GRINL1A complex locus 1	0.152	0.0136
A_23_P65442		IRF9	interferon regulatory factor 9	0.137	0.0136
A_23_P99360		TRIM13	tripartite motif containing 13	0.13	0.0136
A_33_P3395389		ZNF420	zinc finger protein 420	0.168	0.0136
A_24_P410952		PEA15	phosphoprotein enriched in astrocytes 15	0.122	0.0137
A_23_P308673	D	TAOK2	TAO kinase 2	0.194	0.0137
A_19_P00320842		C17orf51	chromosome 17 open reading frame 51	0.152	0.0138
A_23_P411922		PRPF40B	pre-mRNA processing factor 40 homolog B	0.148	0.0138
A_19_P00315601				0.224	0.0139
A_21_P0008622		IVD	isovaleryl-CoA dehydrogenase	0.162	0.0139
A_24_P365327		LSM14A	LSM14A mRNA processing body assembly factor	0.126	0.0139
A_24_P74981		KDM1A	lysine (K)-specific demethylase 1A	0.186	0.0139
A_23_P37569		MAN2A2	mannosidase, alpha, class 2A, member 2	0.175	0.0139
A_23_P136547		PIGG	phosphatidylinositol glycan anchor biosynthesis class G	0.108	0.0139
A_23_P18142		RPL32	ribosomal protein L32	-0.094	0.0139
A_33_P3297923		TPRN	taperin	0.134	0.0139
A_19_P00322495		TSTD3	thiosulfate sulfurtransferase (rhodanese)-like domain containing 3	0.163	0.0139
A_33_P3685572		LOC157562	uncharacterized LOC157562	0.199	0.0139
A_19_P00802464				0.279	0.014
A_23_P408473		MROH1	maestro heat-like repeat family member 1	0.134	0.014
A_32_P76156		RWDD4	RWD domain containing 4	0.182	0.014
A_23_P46871		SLC29A3	solute carrier family 29 (equilibrative nucleoside transporter), member 3	0.157	0.014
A_23_P130731		TBC1D17	TBC1 domain family member 17	0.163	0.014
A_24_P917833		TMED10	transmembrane p24 trafficking protein 10	0.109	0.014
A_24_P305623		TMEM50B	transmembrane protein 50B	0.136	0.014
A_19_P00315869				0.219	0.0141
A_24_P339416	D	ARSG	arylsulfatase G	0.147	0.0141
A_23_P422071		B3GALT4	Beta-1,3-galactosyltransferase 4	0.175	0.0141
A_23_P13183		EXT2	exostosin glycosyltransferase 2	0.106	0.0141
A_24_P254278		SLC23A2	solute carrier family 23 (ascorbic acid transporter), member 2	0.159	0.0141
A_23_P255601		TMEM185A	transmembrane protein 185A	0.116	0.0141
A_24_P355720		FGF4	fibroblast growth factor 4	0.238	0.0142
A_23_P120883		HMOX1	heme oxygenase 1	-0.171	0.0142
A_23_P3312		ISLR	immunoglobulin superfamily containing leucine-rich repeat	0.149	0.0142
A_24_P305960		LEMD2	LEM domain containing 2	0.136	0.0142
A_24_P239731		B4GALT5	UDP-Gal:betaGlcNAc beta 1,4- galactosyltransferase, polypeptide 5	0.127	0.0144
A_33_P3288614		LOC101927322	uncharacterized LOC101927322	0.18	0.0144
A_24_P295806		CHID1	chitinase domain containing 1	0.105	0.0145
A_21_P0002024				0.354	0.0146
A_23_P37514		C15orf39	chromosome 15 open reading frame 39	-0.136	0.0146
A_23_P88404		TGFB3	transforming growth factor beta 3	0.194	0.0146
A_23_P215318		VPS41	VPS41 HOPS complex subunit	-0.13	0.0146
A_33_P3294986		LIPE	lipase, hormone-sensitive	-0.21	0.0147
A_23_P430381		LYSMD1	LysM, putative peptidoglycan-binding, domain containing 1	0.145	0.0147
A_23_P202496		NOC3L	NOC3-like DNA replication regulator	-0.131	0.0147
A_33_P3365352		LOC100130476	uncharacterized LOC100130476	-0.321	0.0147
A_33_P3363271		CACNB2	calcium channel, voltage-dependent, beta 2 subunit	0.206	0.0148
A_23_P102420		CCT4	chaperonin containing TCP1 subunit 4	-0.117	0.0148
A_32_P26376		POGLUT1	protein O-glucosyltransferase 1	0.116	0.0148
A_21_P0008759		PEAK1	pseudopodium enriched atypical kinase 1	0.167	0.0148
A_33_P3215848				-0.241	0.0149
A_23_P54636		ATP6V0D1	ATPase, H+ transporting, lysosomal 38kDa, V0 subunit d1	0.108	0.0149
A_23_P118741		SLC16A13	solute carrier family 16 member 13	0.204	0.0149
A_23_P115036		IPO13	importin 13	0.177	0.015
A_33_P3407742	D	PPM1B	protein phosphatase, Mg2+/Mn2+ dependent 1B	0.18	0.015
A_24_P295590		RASSF4	Ras association (RalGDS/AF-6) domain family member 4	0.201	0.015
A_33_P3414362		USP32	ubiquitin specific peptidase 32	0.204	0.015
A_23_P218486		WDR83OS	WD repeat domain 83 opposite strand	0.104	0.015
A_23_P73540		CCDC120	coiled-coil domain containing 120	0.181	0.0151
A_24_P298360		LTBP3	latent transforming growth factor beta binding protein 3	0.103	0.0151
A_23_P100501		HMOX2	heme oxygenase 2	0.102	0.0152
A_23_P127522		HYLS1	hydrolethalus syndrome 1	0.122	0.0152
A_24_P108779		KCTD17	potassium channel tetramerization domain containing 17	0.132	0.0152
A_23_P334123		ITFG1	integrin alpha FG-GAP repeat containing 1	0.122	0.0153
A_21_P0014716		LRCH3	leucine-rich repeats and calponin homology (CH) domain containing 3	0.114	0.0153
A_33_P3413987	D	SERPING1	serpin peptidase inhibitor, clade G (C1 inhibitor), member 1	0.146	0.0153
A_23_P103837		UBAP2L	ubiquitin associated protein 2 like	0.101	0.0153
A_32_P190488				-0.144	0.0155
A_21_P0004856				0.2	0.0155
A_23_P8913		CA2	carbonic anhydrase II	-0.225	0.0155
A_24_P338992		EDC3	enhancer of mRNA decapping 3	0.11	0.0155
A_23_P329924		HCAR2	hydroxycarboxylic acid receptor 2	-0.229	0.0155
A_23_P315892		ST6GALNAC6	ST6 (alpha-N-acetyl-neuraminyl-2,3-beta-galactosyl-1,3)-N-acetylgalactosaminide alpha-2,6-sialyltransferase 6	0.158	0.0155
A_33_P3228837		CD8A	CD8a molecule	-0.312	0.0156
A_33_P3361442		C19orf73	chromosome 19 open reading frame 73	-0.246	0.0156
A_23_P218131	D	INF2	inverted formin, FH2 and WH2 domain containing	-0.172	0.0156
A_23_P340848		PTGIR	prostaglandin I2 (prostacyclin) receptor (IP)	0.147	0.0156
A_23_P57819		TATDN2	TatD DNase domain containing 2	0.138	0.0156
A_23_P163148		VIPAS39	VPS33B interacting protein, apical-basolateral polarity regulator, spe-39 homolog	0.126	0.0156
A_24_P167473		ARPC3	actin related protein 2/3 complex subunit 3	-0.099	0.0157
A_33_P3362353		ARAF	A-Raf proto-oncogene, serine/threonine kinase	0.165	0.0158
A_33_P3217709		CBWD5	COBW domain containing 5	0.262	0.0158
A_33_P3313596		CDK11A	cyclin-dependent kinase 11A	-0.104	0.0158
A_23_P113184		FTO	fat mass and obesity associated	0.116	0.0158
A_23_P336513		GEMIN5	gem nuclear organelle associated protein 5	-0.186	0.0158
A_24_P273865		MED20	mediator complex subunit 20	0.153	0.0158
A_23_P406928		MT-ND5	NADH dehydrogenase, subunit 5 (complex I)	0.186	0.0158
A_23_P136347		EPS8	epidermal growth factor receptor pathway substrate 8	-0.153	0.0159
A_23_P100704		MAPK7	mitogen-activated protein kinase 7	0.126	0.0159
A_23_P64630		RNF26	ring finger protein 26	0.091	0.0159
A_33_P3352822		ZNF547	zinc finger protein 547	0.158	0.0159
A_33_P3263989				0.19	0.016
A_33_P3223592		APOE	apolipoprotein E	-0.24	0.016
A_33_P3347291	D	INMT	indolethylamine N-methyltransferase	0.46	0.016
A_24_P944458		INSIG2	insulin induced gene 2	0.124	0.016
A_23_P208516		MBOAT7	membrane bound O-acyltransferase domain containing 7	0.124	0.016
A_23_P69242		SUMF1	sulfatase modifying factor 1	0.128	0.0161
A_23_P145965		TPST1	tyrosylprotein sulfotransferase 1	0.141	0.0161
A_23_P410587		JADE1	jade family PHD finger 1	0.139	0.0162
A_23_P24104		PLAU	plasminogen activator, urokinase	0.144	0.0162
A_23_P203920		SSPN	sarcospan	0.148	0.0162
A_33_P3329344		FASN	fatty acid synthase	-0.197	0.0163
A_23_P86133		RPA2	replication protein A2	0.152	0.0163
A_23_P214208		CNR1	cannabinoid receptor 1 (brain)	-0.199	0.0164
A_33_P3394494		ELP5	elongator acetyltransferase complex subunit 5	-0.123	0.0164
A_23_P33683		MARCH2	membrane associated ring-CH-type finger 2	0.233	0.0164
A_24_P344295	D	RNF167	ring finger protein 167	0.167	0.0165
A_23_P143274		NRSN2	neurensin 2	0.173	0.0166
A_33_P3360072		RANBP3L	RAN binding protein 3-like	0.22	0.0166
A_23_P214666		RPS18	ribosomal protein S18	-0.145	0.0166
A_23_P322043		SMG5	SMG5 nonsense mediated mRNA decay factor	0.126	0.0166
A_23_P138435		ZMIZ1	zinc finger, MIZ-type containing 1	-0.125	0.0166
A_23_P143120		ADAM17	ADAM metallopeptidase domain 17	0.119	0.0167
A_33_P3296352	D	PPM1B	protein phosphatase, Mg2+/Mn2+ dependent 1B	0.142	0.0167
A_24_P232696		SMARCD1	SWI/SNF related, matrix associated, actin dependent regulator of chromatin, subfamily d, member 1	0.153	0.0167
A_32_P224149		FKBP15	FK506 binding protein 15	0.132	0.0168
A_24_P250499		RPRD1B	regulation of nuclear pre-mRNA domain containing 1B	0.221	0.0168
A_23_P203488		SMPD1	sphingomyelin phosphodiesterase 1	0.136	0.0168
A_23_P13425		CD81	CD81 molecule	0.119	0.0169
A_23_P93311		DDR1	discoidin domain receptor tyrosine kinase 1	0.184	0.0169
A_33_P3228435		FXYD1	FXYD domain containing ion transport regulator 1	0.178	0.0169
A_23_P4885		AP2A1	adaptor related protein complex 2 alpha 1 subunit	0.148	0.017
A_23_P32223		CIZ1	CDKN1A interacting zinc finger protein 1	0.114	0.017
A_33_P3310533		DNAJC21	DnaJ heat shock protein family (Hsp40) member C21	-0.121	0.017
A_32_P59302		HIVEP3	human immunodeficiency virus type I enhancer binding protein 3	-0.205	0.017
A_23_P150147		SSH3	slingshot protein phosphatase 3	0.163	0.017
A_33_P3286621	D	SCARNA16	small Cajal body-specific RNA 16	-0.34	0.017
A_23_P63289		SSU72	SSU72 homolog, RNA polymerase II CTD phosphatase	0.083	0.017
A_23_P105519		WBP11	WW domain binding protein 11	0.128	0.017
A_21_P0003279				0.384	0.0171
A_23_P433016		FBLN1	fibulin 1	0.234	0.0171
A_23_P410017		TBCEL	tubulin folding cofactor E-like	0.139	0.0171
A_24_P22976		ARRDC2	arrestin domain containing 2	0.143	0.0172
A_33_P3418668		PWARSN	Prader Willi/Angelman region RNA, SNRPN neighbor	0.159	0.0172
A_23_P407112		SPATA18	spermatogenesis associated 18	0.192	0.0172
A_23_P159952		BEX1	brain expressed X-linked 1	-0.254	0.0173
A_24_P453921		DPY19L1P1	DPY19L1 pseudogene 1	0.21	0.0173
A_21_P0013662		HSPB1	heat shock protein family B (small) member 1	0.149	0.0173
A_23_P399146		ZNF549	zinc finger protein 549	0.156	0.0173
A_21_P0003027				0.198	0.0174
A_24_P84781				0.352	0.0175
A_24_P664939		CNBP	CCHC-type zinc finger, nucleic acid binding protein	0.156	0.0175
A_23_P339633		GPATCH11	G-patch domain containing 11	-0.144	0.0175
A_23_P251562		TUSC2	tumor suppressor candidate 2	0.091	0.0175
A_24_P258955		ZNF317	zinc finger protein 317	0.118	0.0175
A_23_P210300		ASXL2	additional sex combs like 2, transcriptional regulator	-0.118	0.0177
A_24_P191067		CLSTN1	calsyntenin 1	0.094	0.0177
A_23_P92687		DAP	death-associated protein	0.121	0.0177
A_32_P54018		KIAA1143	KIAA1143	0.14	0.0177
A_23_P87150		LPXN	leupaxin	-0.162	0.0177
A_23_P258136		MXRA5	matrix-remodelling associated 5	0.17	0.0177
A_23_P387537		PRRG3	proline rich Gla (G-carboxyglutamic acid) 3 (transmembrane)	-0.225	0.0177
A_24_P942030	D	VAMP4	vesicle associated membrane protein 4	0.181	0.0177
A_23_P35576		ZNF518A	zinc finger protein 518A	0.161	0.0177
A_24_P286054		ZFYVE16	zinc finger, FYVE domain containing 16	0.177	0.0177
A_23_P431853		MT-ND2	MTND2	0.185	0.0178
A_21_P0013306	D	FKBP9	FK506 binding protein 9	0.138	0.0179
A_23_P215419		ICA1	islet cell autoantigen 1	-0.19	0.0179
A_33_P3381827		OSBPL2	oxysterol binding protein like 2	-0.133	0.0179
A_23_P15402		SAT2	spermidine/spermine N1-acetyltransferase family member 2	-0.122	0.0179
A_21_P0014838		ZEB2	zinc finger E-box binding homeobox 2	-0.256	0.0179
A_23_P252913		BBS7	Bardet-Biedl syndrome 7	0.186	0.018
A_33_P3359368		DHRS4L1	dehydrogenase/reductase (SDR family) member 4 like 1	-0.164	0.018
A_33_P3429864		EPN2	epsin 2	0.127	0.018
A_21_P0011341		NPM1	nucleophosmin (nucleolar phosphoprotein B23, numatrin)	-0.124	0.018
A_33_P3397443		PKMYT1	protein kinase, membrane associated tyrosine/threonine 1	-0.184	0.018
A_23_P118002		UQCRC2	ubiquinol-cytochrome c reductase core protein II	-0.094	0.018
A_21_P0003164				-0.287	0.0181
A_21_P0013748		CD99P1	CD99 molecule pseudogene 1	0.118	0.0182
A_23_P256542		FAM162A	family with sequence similarity 162 member A	-0.093	0.0182
A_33_P3348239		FBN1	fibrillin 1	-0.108	0.0182
A_23_P123622		NPR2	natriuretic peptide receptor 2	0.129	0.0182
A_23_P148297		SH3BGRL	SH3 domain binding glutamate-rich protein like	0.101	0.0182
A_23_P39024		WDR83	WD repeat domain 83	0.134	0.0182
A_23_P70583		VPS52	VPS52 GARP complex subunit	0.164	0.0183
A_24_P351420		ZDHHC3	zinc finger, DHHC-type containing 3	0.126	0.0183
A_33_P3216337		FTSJ1	FtsJ RNA methyltransferase homolog 1 (E. coli)	-0.148	0.0184
A_33_P3277096		LY6G6E	lymphocyte antigen 6 complex, locus G6E (pseudogene)	0.215	0.0184
A_23_P164057		MFAP4	microfibrillar associated protein 4	0.131	0.0184
A_24_P146892		ORAI1	ORAI calcium release-activated calcium modulator 1	0.128	0.0184
A_23_P325631		SKI	SKI proto-oncogene	0.198	0.0184
A_19_P00315843	D	SCARNA16	small Cajal body-specific RNA 16	-0.329	0.0184
A_33_P3226542	D	SNORD3B-1	small nucleolar RNA, C/D box 3B-1	-0.306	0.0185
A_21_P0013060				0.113	0.0185
A_33_P3280385		COL6A3	collagen, type VI, alpha 3	-0.196	0.0185
A_32_P155416		ERI3	ERI1 exoribonuclease family member 3	0.177	0.0185
A_23_P398294		HIP1R	huntingtin interacting protein 1 related	-0.186	0.0185
A_23_P50349		TRIP10	thyroid hormone receptor interactor 10	0.135	0.0185
A_32_P129752		TMEM30B	transmembrane protein 30B	0.179	0.0185
A_23_P93750		LSM5	LSM5 homolog, U6 small nuclear RNA and mRNA degradation associated	0.09	0.0186
A_33_P3275998		RABEP1	rabaptin, RAB GTPase binding effector protein 1	0.147	0.0186
A_21_P0001367				-0.462	0.0187
A_23_P170733		ANTXR2	anthrax toxin receptor 2	0.116	0.0187
A_23_P313632		FUT8	fucosyltransferase 8 (alpha (1,6) fucosyltransferase)	0.215	0.0187
A_33_P3772937		KRT8P12	keratin 8 pseudogene 12	0.168	0.0187
A_23_P327069		KIAA0232	KIAA0232	-0.109	0.0187
A_32_P66881		TLR4	toll-like receptor 4	0.19	0.0187
A_23_P129101		HEXA	hexosaminidase A (alpha polypeptide)	0.143	0.0188
A_33_P3236868		MT1X	metallothionein 1X	0.152	0.0188
A_19_P00317052		RNF213	ring finger protein 213	-0.164	0.0189
A_24_P289139		SH3KBP1	SH3-domain kinase binding protein 1	-0.156	0.0189

## Sheet: RNA BPA at 10 µM
ID	Duplication	Symbol	Gene Name	log2FC	Pvalue
A_23_P133474	D	GPX3	glutathione peroxidase 3	0.793	8.11e-13
A_23_P70307	D	SMOC2	SPARC related modular calcium binding 2	0.868	1.39e-12
A_24_P11315		OLFML3	olfactomedin like 3	0.483	5.11e-11
A_23_P120125		COLEC11	collectin subfamily member 11	0.409	1.7e-10
A_23_P393620		TFPI2	tissue factor pathway inhibitor 2	-0.761	4.15e-10
A_33_P3369371	D	GPX3	glutathione peroxidase 3	0.785	2.49e-09
A_23_P139123	D	SERPING1	serpin peptidase inhibitor, clade G (C1 inhibitor), member 1	0.428	7.88e-09
A_23_P125423	D	C1R	complement component 1, r subcomponent	0.375	1.05e-08
A_23_P153964		INHBB	inhibin beta B	0.457	1.09e-08
A_24_P31929		PRRG1	proline rich Gla (G-carboxyglutamic acid) 1	0.317	2.1e-08
A_23_P126706	D	ANGPTL1	angiopoietin like 1	0.49	3.11e-08
A_33_P3413987	D	SERPING1	serpin peptidase inhibitor, clade G (C1 inhibitor), member 1	0.367	3.32e-08
A_24_P396702	D	CD302	CD302 molecule	0.358	7.97e-08
A_21_P0000310		SNORA12	small nucleolar RNA, H/ACA box 12	0.377	8.21e-08
A_23_P43810	D	LTBP1	latent transforming growth factor beta binding protein 1	-0.421	9.93e-08
A_33_P3351416	D	SMOC2	SPARC related modular calcium binding 2	0.641	1.04e-07
A_33_P3230478	D	C1S	complement component 1, s subcomponent	0.321	1.53e-07
A_23_P373521		HAND2	heart and neural crest derivatives expressed 2	0.282	1.54e-07
A_23_P164057		MFAP4	microfibrillar associated protein 4	0.29	1.7e-07
A_23_P2920	D	SERPINA3	serpin peptidase inhibitor, clade A (alpha-1 antiproteinase, antitrypsin), member 3	0.372	1.76e-07
A_23_P378690	D	TMEM64	transmembrane protein 64	0.397	2.29e-07
A_23_P428129		CDKN1C	cyclin-dependent kinase inhibitor 1C (p57, Kip2)	0.442	2.45e-07
A_33_P3266010		RIN1	Ras and Rab interactor 1	-0.299	2.66e-07
A_23_P103110		MAFF	v-maf avian musculoaponeurotic fibrosarcoma oncogene homolog F	-0.291	2.7e-07
A_33_P3278911	D	PHF20L1	PHD finger protein 20-like 1	-0.465	2.79e-07
A_23_P132159		USP18	ubiquitin specific peptidase 18	0.376	4.68e-07
A_24_P216456		MAP1LC3C	microtubule associated protein 1 light chain 3 gamma	0.438	5.21e-07
A_33_P3708413		MFAP5	microfibrillar associated protein 5	0.367	5.49e-07
A_23_P203920		SSPN	sarcospan	0.311	9.24e-07
A_23_P216038	D	PHF20L1	PHD finger protein 20-like 1	-0.488	9.35e-07
A_21_P0000222		SNORD46	small nucleolar RNA, C/D box 46	0.454	9.68e-07
A_23_P34345		VCAM1	vascular cell adhesion molecule 1	0.437	1.16e-06
A_23_P155596		FMO3	flavin containing monooxygenase 3	0.437	1.23e-06
A_24_P150466	D	SMOC1	SPARC related modular calcium binding 1	0.402	1.46e-06
A_23_P56578	D	VIT	vitrin	0.658	1.48e-06
A_24_P381199		TRIM6	tripartite motif containing 6	0.273	1.63e-06
A_33_P3354935	D	CSF1	colony stimulating factor 1	0.276	1.66e-06
A_24_P181055		ST3GAL4	ST3 beta-galactoside alpha-2,3-sialyltransferase 4	0.188	1.72e-06
A_23_P160992		FMO4	flavin containing monooxygenase 4	0.392	1.75e-06
A_21_P0001545				0.271	1.77e-06
A_23_P307310		ACAN	aggrecan	-0.707	2.35e-06
A_23_P42331		HMGA1	high mobility group AT-hook 1	-0.45	2.41e-06
A_21_P0000265		SNORA45A	small nucleolar RNA, H/ACA box 3A	0.314	2.76e-06
A_23_P54447		LINC00597	long intergenic non-protein coding RNA 597	-0.614	2.83e-06
A_23_P53198		DGAT2	diacylglycerol O-acyltransferase 2	-0.377	3.21e-06
A_23_P71867		IL11RA	interleukin 11 receptor subunit alpha	0.32	3.28e-06
A_33_P3300267	D	VIT	vitrin	0.596	3.37e-06
A_33_P3304655	D	LTBP1	latent transforming growth factor beta binding protein 1	-0.461	3.49e-06
A_24_P2648	D	PTPN14	protein tyrosine phosphatase, non-receptor type 14	-0.255	3.69e-06
A_33_P3241521	D	EBF1	early B-cell factor 1	0.288	3.95e-06
A_33_P3360072		RANBP3L	RAN binding protein 3-like	0.417	4.11e-06
A_23_P354387	D	MYOF	myoferlin	-0.225	4.23e-06
A_23_P312851		PMEL	premelanosome protein	-0.375	4.4e-06
A_23_P161624		FOSL1	FOS like antigen 1	-0.363	4.56e-06
A_33_P3236030		ARHGAP24	Rho GTPase activating protein 24	-0.468	4.6e-06
A_23_P108785	D	ACTR3	ARP3 actin-related protein 3 homolog (yeast)	-0.177	4.81e-06
A_23_P417383		ASPRV1	aspartic peptidase, retroviral-like 1	0.334	5.35e-06
A_23_P94338		ENPP2	ectonucleotide pyrophosphatase/phosphodiesterase 2	-0.258	5.46e-06
A_32_P160972		ABRACL	ABRA C-terminal like	-0.213	5.8e-06
A_24_P228026		CYB5D2	cytochrome b5 domain containing 2	0.211	5.94e-06
A_33_P3279708		RNU2-1	RNA, U2 small nuclear 1	0.315	6.17e-06
A_23_P24077		C10orf54	chromosome 10 open reading frame 54	0.272	6.23e-06
A_23_P95930	D	HMGA2	high mobility group AT-hook 2	-0.356	6.68e-06
A_23_P144778		CKMT2	creatine kinase, mitochondrial 2	-0.439	6.88e-06
A_33_P3399788	D	SERPINA3	serpin peptidase inhibitor, clade A (alpha-1 antiproteinase, antitrypsin), member 3	0.298	7.21e-06
A_33_P3327519		SNORA74A	small nucleolar RNA, H/ACA box 74A	0.355	7.61e-06
A_23_P104438		MYPN	myopalladin	-0.301	7.63e-06
A_33_P3423700		LOC100131829	uncharacterized LOC100131829	-0.398	8.06e-06
A_23_P3312		ISLR	immunoglobulin superfamily containing leucine-rich repeat	0.257	1.01e-05
A_33_P3349827	D	RBM3	RNA binding motif (RNP1, RRM) protein 3	-0.283	1.1e-05
A_23_P3681		NETO2	neuropilin and tolloid like 2	-0.536	1.15e-05
A_33_P3237634		TSC22D3	TSC22 domain family member 3	0.261	1.18e-05
A_23_P501831		FAXDC2	fatty acid hydroxylase domain containing 2	0.302	1.26e-05
A_23_P46928	D	PFKP	phosphofructokinase, platelet	-0.373	1.31e-05
A_23_P106002		NFKBIA	nuclear factor of kappa light polypeptide gene enhancer in B-cells inhibitor, alpha	0.259	1.31e-05
A_23_P101054		KRT34	keratin 34, type I	-0.674	1.32e-05
A_24_P92367		YDJC	YdjC homolog (bacterial)	-0.272	1.33e-05
A_23_P158880		STARD5	StAR related lipid transfer domain containing 5	0.297	1.33e-05
A_33_P3441021		TMEM233	transmembrane protein 233	-0.416	1.44e-05
A_33_P3767927		NR3C1	nuclear receptor subfamily 3 group C member 1	0.177	1.44e-05
A_33_P3340757				-0.404	1.48e-05
A_23_P12884		GRK5	G protein-coupled receptor kinase 5	0.321	1.5e-05
A_23_P77103		SORD	sorbitol dehydrogenase	-0.322	1.51e-05
A_21_P0012398				-0.294	1.54e-05
A_23_P162918	D	SERPINA3	serpin peptidase inhibitor, clade A (alpha-1 antiproteinase, antitrypsin), member 3	0.329	1.55e-05
A_23_P123086		PSMG3-AS1	PSMG3 antisense RNA 1 (head to head)	0.194	1.6e-05
A_23_P252808		WBP1	WW domain binding protein 1	0.156	1.61e-05
A_19_P00325768				0.156	1.62e-05
A_23_P318284		GPD1L	glycerol-3-phosphate dehydrogenase 1-like	0.358	1.67e-05
A_19_P00800681	D	PWAR6	Prader Willi/Angelman region RNA 6	-0.359	1.74e-05
A_23_P118392		RASD1	RAS, dexamethasone-induced 1	0.399	1.83e-05
A_23_P324754		CEMIP	cell migration inducing protein, hyaluronan binding	-0.754	2.06e-05
A_24_P943393	D	AHNAK	AHNAK nucleoprotein	-0.29	2.1e-05
A_33_P3219055		C15orf61	chromosome 15 open reading frame 61	0.195	2.21e-05
A_33_P3252394		GADD45G	growth arrest and DNA damage inducible gamma	-0.315	2.23e-05
A_23_P159839		C1GALT1C1	C1GALT1 specific chaperone 1	0.339	2.27e-05
A_23_P80040		PROCR	protein C receptor	0.3	2.36e-05
A_33_P3789693				-0.768	2.4e-05
A_23_P19987		IGF2BP3	insulin like growth factor 2 mRNA binding protein 3	-0.21	2.48e-05
A_23_P22119		PLEC	plectin	-0.329	2.54e-05
A_24_P297551		FAM19A2	family with sequence similarity 19 (chemokine (C-C motif)-like), member A2	0.316	2.56e-05
A_19_P00803019	D	PWAR6	Prader Willi/Angelman region RNA 6	-0.363	2.59e-05
A_23_P137665		CHI3L1	chitinase 3 like 1	-0.536	2.74e-05
A_23_P83579		ARNT2	aryl hydrocarbon receptor nuclear translocator 2	-0.352	2.83e-05
A_23_P2492	D	C1S	complement component 1, s subcomponent	0.295	2.88e-05
A_21_P0000500		SNORD86	small nucleolar RNA, C/D box 86	-0.288	2.95e-05
A_24_P277367		CXCL5	chemokine (C-X-C motif) ligand 5	-0.272	3.03e-05
A_23_P36865		CEP290	centrosomal protein 290kDa	-0.177	3.17e-05
A_23_P98015		CUTC	cutC copper transporter	0.286	3.18e-05
A_33_P3226832		F3	coagulation factor III, tissue factor	0.244	3.27e-05
A_23_P128147		TUBA1B	tubulin alpha 1b	-0.236	3.45e-05
A_21_P0014935		FGD5-AS1	FGD5 antisense RNA 1	0.19	3.7e-05
A_23_P99063		LUM	lumican	0.274	4.17e-05
A_33_P3767773		UBR4	ubiquitin protein ligase E3 component n-recognin 4	-0.232	4.33e-05
A_32_P53524		NTN1	netrin 1	0.313	4.39e-05
A_32_P194115		SUN2	Sad1 and UNC84 domain containing 2	0.26	4.5e-05
A_24_P276816		RCOR3	REST corepressor 3	0.211	4.72e-05
A_23_P103282		TMEM59	transmembrane protein 59	0.147	4.73e-05
A_23_P422071		B3GALT4	Beta-1,3-galactosyltransferase 4	0.284	4.79e-05
A_23_P337262		APCDD1	adenomatosis polyposis coli down-regulated 1	0.59	4.86e-05
A_33_P3392187	D	CCDC85A	coiled-coil domain containing 85A	0.325	4.91e-05
A_33_P3294921	D	PRUNE2	prune homolog 2 (Drosophila)	-0.401	4.94e-05
A_23_P100486		VKORC1	vitamin K epoxide reductase complex subunit 1	0.166	5.12e-05
A_32_P172141		CDON	cell adhesion associated, oncogene regulated	0.211	5.22e-05
A_33_P3421515				-0.24	5.25e-05
A_23_P113161	D	C1orf21	chromosome 1 open reading frame 21	0.285	5.26e-05
A_33_P3275702		FMO2	flavin containing monooxygenase 2	0.546	5.37e-05
A_21_P0014003	D	DST	dystonin	-0.335	5.4e-05
A_23_P114883		FMOD	fibromodulin	0.152	5.44e-05
A_23_P107313		SDF2	stromal cell-derived factor 2	0.16	5.58e-05
A_23_P54376		STOML1	stomatin like 1	0.164	6.16e-05
A_23_P159952		BEX1	brain expressed X-linked 1	-0.433	6.3e-05
A_23_P315892		ST6GALNAC6	ST6 (alpha-N-acetyl-neuraminyl-2,3-beta-galactosyl-1,3)-N-acetylgalactosaminide alpha-2,6-sialyltransferase 6	0.258	6.46e-05
A_33_P3308481		HYMAI	hydatidiform mole associated and imprinted (non-protein coding)	-0.528	6.49e-05
A_23_P36562		ITGA5	integrin subunit alpha 5	-0.298	6.58e-05
A_33_P3762918	D	LINC01004	long intergenic non-protein coding RNA 1004	-0.497	6.83e-05
A_33_P3314436	D	FBXL17	F-box and leucine-rich repeat protein 17	-0.269	6.84e-05
A_23_P301360		ZNF572	zinc finger protein 572	0.289	6.89e-05
A_23_P114713		CYP4B1	cytochrome P450 family 4 subfamily B member 1	1.007	6.93e-05
A_23_P154605		SULF2	sulfatase 2	0.327	7.14e-05
A_24_P199484	D	ANGPTL1	angiopoietin like 1	0.318	7.18e-05
A_23_P124003		P2RX2	purinergic receptor P2X, ligand gated ion channel, 2	-0.268	7.19e-05
A_24_P892472		EMX2OS	EMX2 opposite strand/antisense RNA	0.176	7.28e-05
A_33_P3351536		PTK2B	protein tyrosine kinase 2 beta	0.232	7.28e-05
A_23_P356554		BAG2	BCL2 associated athanogene 2	-0.17	7.42e-05
A_23_P138856		DRAP1	DR1-associated protein 1 (negative cofactor 2 alpha)	-0.207	7.66e-05
A_23_P209269		PPM1B	protein phosphatase, Mg2+/Mn2+ dependent 1B	0.215	8.01e-05
A_23_P214360		IRF4	interferon regulatory factor 4	0.267	8.04e-05
A_23_P24433		CTSF	cathepsin F	0.24	8.18e-05
A_33_P3309468		PTPRS	protein tyrosine phosphatase, receptor type S	0.265	8.19e-05
A_24_P250765		PRKG1	protein kinase, cGMP-dependent, type I	0.255	8.2e-05
A_23_P167096		VEGFC	vascular endothelial growth factor C	0.234	8.37e-05
A_24_P330263		EDNRB	endothelin receptor type B	0.396	8.47e-05
A_23_P310460		MDGA1	MAM domain containing glycosylphosphatidylinositol anchor 1	0.306	8.49e-05
A_24_P171058	D	TMEM64	transmembrane protein 64	0.272	8.83e-05
A_23_P14124		RASL11A	RAS-like family 11 member A	0.378	8.85e-05
A_33_P3330549		SLC44A2	solute carrier family 44 (choline transporter), member 2	0.152	8.92e-05
A_23_P217015		SET	SET nuclear proto-oncogene	-0.266	8.94e-05
A_33_P3413962	D	PFKP	phosphofructokinase, platelet	-0.282	9.28e-05
A_23_P33364		SH3D19	SH3 domain containing 19	0.196	9.37e-05
A_23_P73511		ARAF	A-Raf proto-oncogene, serine/threonine kinase	0.193	9.43e-05
A_24_P273253	D	AHNAK2	AHNAK nucleoprotein 2	-0.599	9.76e-05
A_32_P219520		TNFAIP8	TNF alpha induced protein 8	0.178	9.8e-05
A_24_P76018		ARIH2OS	ariadne homolog 2 opposite strand	0.255	9.91e-05
A_33_P3676746		YLPM1	YLP motif containing 1	-0.242	0.000103
A_24_P176079		WASF3	WAS protein family member 3	0.248	0.000103
A_23_P258340		PPIA	peptidylprolyl isomerase A	-0.161	0.000105
A_33_P3363271		CACNB2	calcium channel, voltage-dependent, beta 2 subunit	0.328	0.000105
A_23_P210358		LIMS1	LIM-type zinc finger domains 1	-0.173	0.000112
A_23_P425880	D	TRIO	trio Rho guanine nucleotide exchange factor	-0.271	0.000113
A_33_P3275255				-0.432	0.000116
A_23_P397293		LY6K	lymphocyte antigen 6 complex, locus K	-0.419	0.000117
A_23_P115824		HNRNPH3	heterogeneous nuclear ribonucleoprotein H3 (2H9)	0.161	0.000118
A_24_P305623		TMEM50B	transmembrane protein 50B	0.22	0.00012
A_23_P147665		OLFML1	olfactomedin like 1	0.291	0.000122
A_23_P70670		CD83	CD83 molecule	0.293	0.000124
A_21_P0013548				-0.375	0.000125
A_19_P00802154	D	DST	dystonin	-0.262	0.000128
A_33_P3393821	D	C1R	complement component 1, r subcomponent	0.264	0.00013
A_23_P150693		FJX1	four jointed box 1	-0.209	0.000138
A_23_P116898		A2M	alpha-2-macroglobulin	-0.341	0.00014
A_33_P3221868		TMEM216	transmembrane protein 216	0.228	0.000141
A_33_P3306146	D	PLAU	plasminogen activator, urokinase	0.26	0.000143
A_33_P3284508		CD14	CD14 molecule	0.253	0.000144
A_23_P5983		PLTP	phospholipid transfer protein	0.229	0.000148
A_33_P3295203	D	HAS1	hyaluronan synthase 1	-0.492	0.000149
A_33_P3373985				-0.303	0.000149
A_21_P0000893		IQCH-AS1	IQCH antisense RNA 1	0.247	0.000158
A_24_P813147		TUBB8	tubulin beta 8 class VIII	-0.209	0.000159
A_23_P349566	D	CCDC85A	coiled-coil domain containing 85A	0.389	0.000162
A_32_P150030	D	PPM1D	protein phosphatase, Mg2+/Mn2+ dependent 1D	0.212	0.000163
A_33_P3401284		RMRP	RNA component of mitochondrial RNA processing endoribonuclease	-0.259	0.000165
A_23_P49338		TNFRSF12A	tumor necrosis factor receptor superfamily member 12A	-0.451	0.00017
A_33_P3236177		ANG	angiogenin, ribonuclease, RNase A family, 5	0.237	0.000171
A_33_P3228305		ARHGAP26	Rho GTPase activating protein 26	0.235	0.000172
A_21_P0012596		LINC01088	long intergenic non-protein coding RNA 1088	0.686	0.000173
A_32_P514599		HSPD1P6	heat shock protein family D (Hsp60) member 1 pseudogene 6	-0.256	0.000178
A_33_P3234804		CBR4	carbonyl reductase 4	0.177	0.000178
A_23_P214897		AKAP12	A-kinase anchoring protein 12	-0.278	0.00018
A_23_P21485		PID1	phosphotyrosine interaction domain containing 1	0.201	0.000184
A_33_P3244998		ODF2L	outer dense fiber of sperm tails 2-like	-0.398	0.000186
A_33_P3373459		CHST12	carbohydrate (chondroitin 4) sulfotransferase 12	0.186	0.000187
A_23_P422851		CABLES1	Cdk5 and Abl enzyme substrate 1	-0.201	0.000188
A_23_P211167		C21orf2	chromosome 21 open reading frame 2	0.29	0.000188
A_23_P398294		HIP1R	huntingtin interacting protein 1 related	-0.287	0.00019
A_23_P12199		FAM46B	family with sequence similarity 46 member B	0.331	0.000191
A_21_P0006998				-0.374	0.000193
A_23_P320113		SRXN1	sulfiredoxin 1	-0.184	0.000193
A_23_P164436		ASPA	aspartoacylase	0.27	0.000193
A_33_P3303414		MAN1A1	mannosidase, alpha, class 1A, member 1	0.366	0.000193
A_24_P37441		PDK1	pyruvate dehydrogenase kinase 1	-0.251	0.000194
A_24_P917833		TMED10	transmembrane p24 trafficking protein 10	0.149	0.000194
A_23_P258944		DNAJB9	DnaJ heat shock protein family (Hsp40) member B9	0.254	0.000195
A_23_P97123		ANKRD36BP1	ankyrin repeat domain 36B pseudogene 1	0.249	0.000198
A_33_P3302957	D	PLEKHG4	pleckstrin homology and RhoGEF domain containing G4	-0.311	0.000199
A_23_P33759		DHRS3	dehydrogenase/reductase (SDR family) member 3	0.293	0.0002
A_23_P406025	D	PRUNE2	prune homolog 2 (Drosophila)	-0.32	0.000202
A_23_P59528		SDHAF3	succinate dehydrogenase complex assembly factor 3	0.17	0.000205
A_23_P388780		DMAP1	DNA methyltransferase 1 associated protein 1	0.174	0.000205
A_23_P121253		TNFSF10	tumor necrosis factor superfamily member 10	0.302	0.000205
A_21_P0010981		MALAT1	metastasis associated lung adenocarcinoma transcript 1 (non-protein coding)	-0.363	0.000209
A_23_P119562		CFD	complement factor D (adipsin)	0.234	0.000209
A_19_P00322933	D	LINC00963	long intergenic non-protein coding RNA 963	0.201	0.000214
A_21_P0000298		SNORD8	small nucleolar RNA, C/D box 8	0.25	0.00022
A_24_P166789	D	IMPAD1	inositol monophosphatase domain containing 1	0.16	0.000223
A_33_P3279959	D	PLXNA4	plexin A4	0.29	0.000228
A_23_P150018		DUSP5	dual specificity phosphatase 5	-0.361	0.000231
A_33_P3287745		KAT8	K(lysine) acetyltransferase 8	0.124	0.000231
A_23_P133245		IK	IK cytokine, down-regulator of HLA II	0.149	0.000231
A_23_P53668		NFYB	nuclear transcription factor Y subunit beta	0.307	0.000231
A_33_P3404097		PGM5P2	phosphoglucomutase 5 pseudogene 2	-0.546	0.000234
A_24_P97825		CCDC69	coiled-coil domain containing 69	0.287	0.000239
A_23_P60248		TXN	thioredoxin	-0.269	0.000241
A_33_P3329839		CDK2AP2	cyclin-dependent kinase 2 associated protein 2	0.191	0.000243
A_33_P3354945	D	CSF1	colony stimulating factor 1	0.215	0.000244
A_23_P155351		BTD	biotinidase	0.195	0.000245
A_21_P0004242		LOC101926940	uncharacterized LOC101926940	0.348	0.000245
A_33_P3229370		ID4	inhibitor of DNA binding 4, dominant negative helix-loop-helix protein	0.273	0.000247
A_19_P00316340	D	LOC100506860	uncharacterized LOC100506860	-0.296	0.000249
A_24_P282309	D	MYOF	myoferlin	-0.238	0.000249
A_33_P3417502		WNT3A	wingless-type MMTV integration site family member 3A	0.468	0.00025
A_24_P81841	D	CDKN1B	cyclin-dependent kinase inhibitor 1B (p27, Kip1)	0.17	0.000251
A_23_P98402		SIDT2	SID1 transmembrane family member 2	0.236	0.000261
A_23_P320242		KIAA1324L	KIAA1324-like	0.423	0.000265
A_23_P151895		CILP	cartilage intermediate layer protein	0.743	0.00027
A_23_P120270		MCFD2	multiple coagulation factor deficiency 2	-0.224	0.000271
A_33_P3522511				-0.451	0.000272
A_24_P419276	D	ZNF248	zinc finger protein 248	0.221	0.000274
A_23_P338534	D	HIF3A	hypoxia inducible factor 3, alpha subunit	0.337	0.000274
A_33_P3210488	D	COL6A3	collagen, type VI, alpha 3	-0.372	0.000278
A_23_P57417		MMP11	matrix metallopeptidase 11	-0.282	0.000281
A_33_P3368879		LMOD1	leiomodin 1	0.236	0.000281
A_23_P426636	D	AHNAK	AHNAK nucleoprotein	-0.289	0.000291
A_23_P55319		FLOT2	flotillin 2	-0.174	0.000294
A_23_P89941		CDKN2D	cyclin-dependent kinase inhibitor 2D (p19, inhibits CDK4)	0.181	0.000302
A_33_P3260307		CARHSP1	calcium regulated heat stable protein 1	0.197	0.000303
A_19_P00317023	D	PVT1	Pvt1 oncogene (non-protein coding)	-0.505	0.000305
A_33_P3245011		TKFC	triokinase/FMN cyclase	0.196	0.00031
A_23_P34045		EDA	ectodysplasin A	0.289	0.00031
A_33_P3228252				-0.563	0.000313
A_24_P304051		GSTO1	glutathione S-transferase omega 1	-0.28	0.000314
A_23_P86100		KLHDC9	kelch domain containing 9	0.297	0.000314
A_19_P00315603				-0.586	0.000315
A_24_P82880	D	TPM4	tropomyosin 4	-0.304	0.000318
A_33_P3226050	D	GATSL3	GATS protein-like 3	0.194	0.00032
A_23_P35995		CLMP	CXADR-like membrane protein	0.197	0.000322
A_19_P00317647	D	LINC01278	long intergenic non-protein coding RNA 1278	-0.229	0.00033
A_24_P52697	D	H19	H19, imprinted maternally expressed transcript (non-protein coding)	0.644	0.00033
A_23_P57036	D	CD40	CD40 molecule	0.237	0.000331
A_23_P431388		SPOCD1	SPOC domain containing 1	-0.319	0.000335
A_23_P204269		USP15	ubiquitin specific peptidase 15	0.211	0.000335
A_23_P120883		HMOX1	heme oxygenase 1	-0.305	0.000339
A_23_P141974	D	TPM4	tropomyosin 4	-0.236	0.000355
A_23_P37569		MAN2A2	mannosidase, alpha, class 2A, member 2	0.204	0.000359
A_23_P83028		RECK	reversion-inducing-cysteine-rich protein with kazal motifs	0.154	0.00036
A_24_P123720		SEC63	SEC63 homolog, protein translocation regulator	0.195	0.000364
A_24_P244706		SSTR1	somatostatin receptor 1	-0.408	0.000365
A_24_P341019		TMEM230	transmembrane protein 230	0.155	0.000369
A_32_P18824		BRD7	bromodomain containing 7	0.173	0.000369
A_33_P3811287		HUWE1	HECT, UBA and WWE domain containing 1, E3 ubiquitin protein ligase	-0.186	0.00037
A_23_P126803		ARPC5	actin related protein 2/3 complex subunit 5	-0.198	0.000372
A_23_P257043		GEM	GTP binding protein overexpressed in skeletal muscle	0.251	0.000375
A_23_P34537		EPHX1	epoxide hydrolase 1, microsomal (xenobiotic)	0.201	0.000377
A_23_P210131				-0.327	0.000381
A_19_P00323082	D	H19	H19, imprinted maternally expressed transcript (non-protein coding)	0.609	0.000385
A_33_P3802146	D	LINC00504		-0.482	0.000387
A_24_P195724				-0.169	0.000388
A_33_P3263432		ITGA10	integrin subunit alpha 10	-0.395	0.000389
A_33_P3491294		AMDHD2	amidohydrolase domain containing 2	-0.213	0.000391
A_33_P3252605		CYP2U1	cytochrome P450 family 2 subfamily U member 1	0.236	0.000392
A_23_P21618		PDZRN3	PDZ domain containing ring finger 3	0.233	0.000393
A_33_P3390107		RNA18S5	RNA, 18S ribosomal 5	-0.561	0.000402
A_24_P156501	D	EBF1	early B-cell factor 1	0.175	0.000404
A_23_P108673		EVA1A	eva-1 homolog A (C. elegans)	-0.259	0.000406
A_24_P309594	D	SLC48A1	solute carrier family 48 (heme transporter), member 1	0.151	0.000407
A_23_P48561		EFS	embryonal Fyn-associated substrate	0.183	0.00041
A_23_P50919		SERPINE2	serpin peptidase inhibitor, clade E (nexin, plasminogen activator inhibitor type 1), member 2	-0.493	0.000412
A_24_P287043		IFITM2	interferon induced transmembrane protein 2	0.159	0.000421
A_24_P940517	D	PCYOX1	prenylcysteine oxidase 1	0.224	0.000424
A_23_P19624		BMP6	bone morphogenetic protein 6	-0.24	0.000427
A_23_P88865		CMTM3	CKLF-like MARVEL transmembrane domain containing 3	0.182	0.000433
A_24_P80500		BDH2	3-hydroxybutyrate dehydrogenase, type 2	0.261	0.000435
A_33_P3325558		RABGAP1L	RAB GTPase activating protein 1-like	-0.519	0.000441
A_24_P125881		DGCR2	DiGeorge syndrome critical region gene 2	0.185	0.000441
A_23_P207911		TRPV2	transient receptor potential cation channel, subfamily V, member 2	-0.154	0.000444
A_24_P940115	D	DLC1	DLC1 Rho GTPase activating protein	0.167	0.000445
A_23_P151232		TMEM132C	transmembrane protein 132C	0.341	0.000451
A_23_P165984		ZSWIM3	zinc finger, SWIM-type containing 3	0.265	0.000456
A_23_P318604	D	CYHR1	cysteine/histidine-rich 1	0.173	0.000464
A_24_P203689		KIF7	kinesin family member 7	0.221	0.000467
A_23_P376599		RALBP1	ralA binding protein 1	0.145	0.000474
A_33_P3233000				-0.381	0.000476
A_23_P79622		FKBP7	FK506 binding protein 7	0.179	0.000479
A_32_P100439	D	MTURN	maturin, neural progenitor differentiation regulator homolog (Xenopus)	0.171	0.000481
A_23_P170649		SBSPON	somatomedin B and thrombospondin type 1 domain containing	0.248	0.000484
A_23_P138760		CLCF1	cardiotrophin-like cytokine factor 1	-0.278	0.000486
A_23_P110846		CNOT8	CCR4-NOT transcription complex subunit 8	0.168	0.000492
A_23_P62764		CCDC28B	coiled-coil domain containing 28B	0.231	0.000492
A_23_P18078		RARRES1	retinoic acid receptor responder (tazarotene induced) 1	0.334	0.000502
A_33_P3388810		FPGT-TNNI3K	FPGT-TNNI3K readthrough	-0.186	0.000505
A_21_P0000386		SNORD89	small nucleolar RNA, C/D box 89	0.255	0.000507
A_23_P132644		NCEH1	neutral cholesterol ester hydrolase 1	-0.215	0.000517
A_24_P178444				0.162	0.000518
A_21_P0000336		SNORA54	small nucleolar RNA, H/ACA box 54	0.301	0.000525
A_23_P48740		DIO2	deiodinase, iodothyronine, type II	0.291	0.000526
A_33_P3340254		KMT2D	lysine (K)-specific methyltransferase 2D	-0.185	0.000529
A_23_P121702		OCIAD2	OCIA domain containing 2	-0.26	0.00053
A_33_P3254380		SLC9A7	solute carrier family 9, subfamily A (NHE7, cation proton antiporter 7), member 7	-0.234	0.000532
A_23_P149992		PDLIM1	PDZ and LIM domain 1	0.196	0.000539
A_23_P212696		FSTL1	follistatin like 1	0.177	0.000542
A_33_P3223980	D	TPM3	tropomyosin 3	-0.158	0.000562
A_33_P3645465		PDCD4-AS1	PDCD4 antisense RNA 1	0.244	0.000564
A_23_P147805	D	UPP1	uridine phosphorylase 1	-0.31	0.000567
A_23_P124837		LRP1	LDL receptor related protein 1	-0.311	0.000576
A_23_P29836		TMEM42	transmembrane protein 42	0.195	0.000586
A_32_P197561	D	EBF1	early B-cell factor 1	0.198	0.000594
A_24_P295590	D	RASSF4	Ras association (RalGDS/AF-6) domain family member 4	0.284	0.000594
A_23_P25030		HSD17B6	hydroxysteroid (17-beta) dehydrogenase 6	0.251	0.000599
A_21_P0000400		SNORD114-3	small nucleolar RNA, C/D box 114-3	-0.247	0.000604
A_32_P104000		DCUN1D3	defective in cullin neddylation 1 domain containing 3	0.136	0.000604
A_33_P3348244		BRI3	brain protein I3	-0.195	0.000606
A_23_P215787		HBP1	HMG-box transcription factor 1	0.149	0.00061
A_21_P0013071				0.264	0.000612
A_24_P138022		FAM120A	family with sequence similarity 120A	-0.148	0.000617
A_24_P6030		SMIM11A	small integral membrane protein 11A	0.232	0.000617
A_21_P0014132				-0.175	0.000619
A_33_P3222380	D	AHNAK2	AHNAK nucleoprotein 2	-0.651	0.000632
A_23_P209689	D	ROCK2	Rho-associated, coiled-coil containing protein kinase 2	0.198	0.000641
A_23_P131449		C2orf81	chromosome 2 open reading frame 81	0.168	0.000647
A_23_P211631	D	FBLN1	fibulin 1	0.27	0.00065
A_23_P75310		ARHGAP22	Rho GTPase activating protein 22	-0.233	0.000657
A_23_P44244		SMARCA1	SWI/SNF related, matrix associated, actin dependent regulator of chromatin, subfamily a, member 1	0.191	0.000661
A_23_P306655		AMIGO3	adhesion molecule with Ig-like domain 3	0.165	0.000665
A_21_P0003911				0.255	0.000676
A_23_P100660		SERPINF1	serpin peptidase inhibitor, clade F (alpha-2 antiplasmin, pigment epithelium derived factor), member 1	0.251	0.000677
A_19_P00802390				0.429	0.00068
A_33_P3277407		KMT2E	lysine (K)-specific methyltransferase 2E	0.308	0.000682
A_23_P212608		CLSTN2	calsyntenin 2	0.343	0.000685
A_23_P502609		PIGQ	phosphatidylinositol glycan anchor biosynthesis class Q	0.135	0.00069
A_33_P3234864		UTRN	utrophin	-0.206	0.000696
A_23_P84929		SLC38A5	solute carrier family 38 member 5	-0.216	0.000698
A_33_P3378514		PDE5A	phosphodiesterase 5A	0.229	0.000698
A_24_P309645		TPCN1	two pore segment channel 1	-0.183	0.000708
A_23_P88904		NTHL1	nth-like DNA glycosylase 1	0.167	0.000713
A_23_P83736		ING2	inhibitor of growth family member 2	0.141	0.000715
A_24_P612446	D	C6orf89	chromosome 6 open reading frame 89	0.206	0.000715
A_33_P3567967		LOC55338	uncharacterized LOC55338	-0.437	0.000745
A_24_P29401		PIK3R1	phosphoinositide-3-kinase regulatory subunit 1	0.264	0.000752
A_33_P3711318		LOC257152	uncharacterized LOC257152	-0.339	0.000753
A_23_P60283		XPA	xeroderma pigmentosum, complementation group A	0.136	0.000756
A_23_P133293	D	MCTP1	multiple C2 domains, transmembrane 1	-0.337	0.00076
A_23_P80122		WRB	tryptophan rich basic protein	0.155	0.00076
A_23_P113184		FTO	fat mass and obesity associated	0.107	0.000767
A_23_P342131		CYB561A3	cytochrome b561 family member A3	0.172	0.000769
A_33_P3362869	D	DNAJC19	DnaJ heat shock protein family (Hsp40) member C19	0.107	0.000778
A_19_P00323022	D	LINC00963	long intergenic non-protein coding RNA 963	0.189	0.000779
A_33_P3321432		FAM198B	family with sequence similarity 198 member B	0.245	0.000782
A_33_P3261610		POLR3GL	polymerase (RNA) III (DNA directed) polypeptide G (32kD)-like	0.156	0.000788
A_24_P364236		NDUFC2	NADH:ubiquinone oxidoreductase subunit C2	0.175	0.000788
A_21_P0013756				0.156	0.00079
A_33_P3215023	D	C6orf89	chromosome 6 open reading frame 89	0.167	0.00079
A_23_P303718	D	DST	dystonin	-0.182	0.000797
A_23_P58390		C4orf32	chromosome 4 open reading frame 32	0.179	0.000798
A_23_P36700		TAPBPL	TAP binding protein-like	0.157	0.000804
A_33_P3343972		RSPH1	radial spoke head 1 homolog (Chlamydomonas)	0.264	0.000808
A_19_P00808923				-0.157	0.000809
A_21_P0000263		SNORA21	small nucleolar RNA, H/ACA box 21	0.298	0.000812
A_33_P3244872		CEP350	centrosomal protein 350kDa	-0.182	0.000815
A_21_P0006496		GAGE13 (includes others)	G antigen 13	0.184	0.000819
A_33_P3340639		GPAM	glycerol-3-phosphate acyltransferase, mitochondrial	-0.636	0.00082
A_23_P385861		CDCA2	cell division cycle associated 2	-0.245	0.00082
A_23_P77304		AP3B2	adaptor related protein complex 3 beta 2 subunit	-0.31	0.000821
A_33_P3294917	D	PRUNE2	prune homolog 2 (Drosophila)	-0.25	0.000827
A_33_P3342285		RAP1A	RAP1A, member of RAS oncogene family	0.163	0.000829
A_23_P15108		YPEL3	yippee like 3	0.152	0.000837
A_23_P344531		SYNPO	synaptopodin	0.205	0.000841
A_33_P3382105				-0.384	0.000847
A_33_P3339860		PLEKHA2	pleckstrin homology domain containing A2	0.303	0.000848
A_23_P144911		EGFLAM	EGF-like, fibronectin type III and laminin G domains	0.282	0.000857
A_23_P131653		PIGF	phosphatidylinositol glycan anchor biosynthesis class F	0.148	0.000858
A_23_P65757		CCNB2	cyclin B2	-0.232	0.000862
A_23_P205959		ALDH1A3	aldehyde dehydrogenase 1 family member A3	0.301	0.000877
A_23_P18413		TIMMDC1	translocase of inner mitochondrial membrane domain containing 1	0.149	0.000878
A_21_P0000220		SNORD33	small nucleolar RNA, C/D box 33	0.169	0.000888
A_24_P319364		F11R	F11 receptor	0.271	0.000888
A_23_P96383		SRPX	sushi-repeat containing protein, X-linked	0.272	0.00089
A_23_P206140		DNAJA4	DnaJ heat shock protein family (Hsp40) member A4	0.212	0.000891
A_33_P3268900		BNIP3L	BCL2/adenovirus E1B 19kDa interacting protein 3-like	-0.466	0.000893
A_24_P941167		APOL6	apolipoprotein L6	0.42	0.000898
A_33_P3286218		DLEU2L	deleted in lymphocytic leukemia 2-like	-0.281	0.000899
A_32_P54553		USP41	ubiquitin specific peptidase 41	0.304	0.0009
A_23_P148297		SH3BGRL	SH3 domain binding glutamate-rich protein like	0.135	0.000912
A_23_P31376		LRRN3	leucine rich repeat neuronal 3	0.278	0.000918
A_19_P00813085				-0.247	0.000921
A_23_P87603		TARBP2	TAR (HIV-1) RNA binding protein 2	-0.143	0.000923
A_23_P251916		RMDN1	regulator of microtubule dynamics 1	0.228	0.000923
A_33_P3344277		HS1BP3	HCLS1 binding protein 3	-0.286	0.000928
A_23_P26954		VAT1	vesicle amine transport 1	-0.185	0.000931
A_33_P3413989	D	SERPING1	serpin peptidase inhibitor, clade G (C1 inhibitor), member 1	0.292	0.000933
A_33_P3341722				-0.255	0.000941
A_33_P3228355		ERV3-1	endogenous retrovirus group 3 member 1	-0.238	0.000941
A_19_P00320722	D	SRP14-AS1	SRP14 antisense RNA1 (head to head)	0.177	0.000945
A_24_P217330		POMGNT2	protein O-linked mannose N-acetylglucosaminyltransferase 2 (beta 1,4-)	0.152	0.000954
A_21_P0009037				-0.275	0.000955
A_24_P306561		TCF25	transcription factor 25 (basic helix-loop-helix)	-0.156	0.000964
A_24_P152188		PRICKLE2	prickle planar cell polarity protein 2	0.169	0.000966
A_33_P3316505		SNORA73A	small nucleolar RNA, H/ACA box 73A	-0.2	0.00097
A_23_P17275		DNAJC27	DnaJ heat shock protein family (Hsp40) member C27	0.251	0.00097
A_33_P3415744	D	ANKRD36B	ankyrin repeat domain 36B	-0.383	0.000971
A_23_P77493		TUBB3	tubulin beta 3 class III	-0.394	0.000977
A_23_P207742	D	THRA	thyroid hormone receptor, alpha	0.184	0.000986
A_33_P3359115		LMBRD1	LMBR1 domain containing 1	0.215	0.000986
A_23_P33326		ADRA1B	adrenoceptor alpha 1B	0.261	0.000986
A_23_P253158		EP400	E1A binding protein p400	-0.223	0.000989
A_24_P255218		MYO5A	myosin VA	-0.253	0.000991
A_33_P3335030	D	ANKRD36	ankyrin repeat domain 36	-0.459	0.000992
A_23_P139547		TUBA1A	tubulin alpha 1a	-0.23	0.000994
A_19_P00315601				-0.545	0.00101
A_23_P145089	D	HSP90AB1	heat shock protein 90kDa alpha family class B member 1	-0.128	0.00101
A_23_P155857		NUDT6	nudix hydrolase 6	0.153	0.00101
A_23_P85703		SOX13	SRY-box 13	0.22	0.00101
A_32_P96719		SHCBP1	SHC SH2-domain binding protein 1	-0.26	0.00102
A_32_P313405	D	LAMA1	laminin subunit alpha 1	-0.544	0.00103
A_23_P387045		CCDC107	coiled-coil domain containing 107	0.119	0.00103
A_33_P3840512		SLC25A15	solute carrier family 25 (mitochondrial carrier; ornithine transporter) member 15	-0.313	0.00104
A_24_P370670		ZMYM6NB	ZMYM6 neighbor	0.166	0.00104
A_23_P55936		FCGRT	Fc fragment of IgG receptor and transporter	0.196	0.00105
A_33_P3416937		FAM206A	family with sequence similarity 206 member A	0.3	0.00105
A_33_P3390570		KMT2A	lysine (K)-specific methyltransferase 2A	-0.182	0.00106
A_24_P236522		CD2BP2	CD2 (cytoplasmic tail) binding protein 2	0.179	0.00106
A_21_P0002474	D	ANKRD36	ankyrin repeat domain 36	-0.288	0.00108
A_23_P118815		BIRC5	baculoviral IAP repeat containing 5	-0.236	0.00108
A_33_P3347417		SPEN	spen family transcriptional repressor	-0.259	0.0011
A_23_P39910		COA5	cytochrome c oxidase assembly factor 5	0.155	0.0011
A_23_P213754		PAIP2	poly(A) binding protein interacting protein 2	0.15	0.00112
A_23_P13701	D	TMBIM4	transmembrane BAX inhibitor motif containing 4	0.16	0.00112
A_24_P322474		PDE4A	phosphodiesterase 4A	0.191	0.00112
A_23_P256107		HPSE	heparanase	0.549	0.00112
A_23_P144959		VCAN	versican	-0.199	0.00113
A_24_P188071	D	TUBA1C	tubulin alpha 1c	-0.234	0.00114
A_23_P146417		TMEM245	transmembrane protein 245	0.182	0.00114
A_23_P131435	D	CD302	CD302 molecule	0.241	0.00114
A_24_P73943	D	COX11	COX11 cytochrome c oxidase copper chaperone	0.138	0.00115
A_23_P117582		JDP2	Jun dimerization protein 2	0.176	0.00115
A_21_P0013453		LINC-PINT	long intergenic non-protein coding RNA, p53 induced transcript	-0.251	0.00116
A_21_P0000299		SNORA19	small nucleolar RNA, H/ACA box 19	0.618	0.00116
A_33_P3340424				-0.127	0.00117
A_33_P3321657		HSPG2	heparan sulfate proteoglycan 2	-0.332	0.00118
A_23_P349676		FBXO41	F-box protein 41	-0.224	0.00119
A_23_P61050		MLKL	mixed lineage kinase domain-like	-0.168	0.0012
A_23_P202448		CXCL12	chemokine (C-X-C motif) ligand 12	0.446	0.0012
A_23_P112397		FBXW5	F-box and WD repeat domain containing 5	0.106	0.00121
A_23_P47527		TMEM258	transmembrane protein 258	0.157	0.00121
A_23_P257583		DENND2A	DENN/MADD domain containing 2A	0.282	0.00121
A_24_P922357		C22orf39	chromosome 22 open reading frame 39	0.162	0.00122
A_23_P373724	D	PPFIBP1	PTPRF interacting protein, binding protein 1 (liprin beta 1)	-0.173	0.00123
A_23_P389897		NGFR	nerve growth factor receptor	0.738	0.00123
A_23_P74778		C1orf54	chromosome 1 open reading frame 54	0.202	0.00124
A_33_P3645805		LOC149401	uncharacterized LOC149401	-0.396	0.00125
A_33_P3358158		CRYBB2P1	crystallin beta B2 pseudogene 1	-0.362	0.00126
A_21_P0010950				-0.355	0.00126
A_33_P3241043				-0.196	0.00127
A_23_P111132		HSPA1A/HSPA1B	heat shock protein family A (Hsp70) member 1A	0.142	0.00128
A_23_P334608		GUSB	glucuronidase, beta	0.191	0.00128
A_33_P3256695		PRPF40A	pre-mRNA processing factor 40 homolog A	-0.305	0.00129
A_23_P252700		UNC50	unc-50 homolog (C. elegans)	0.141	0.00129
A_23_P66891		CDC42EP4	CDC42 effector protein 4	0.219	0.00129
A_21_P0011376				-0.124	0.0013
A_23_P339053		C16orf52	chromosome 16 open reading frame 52	-0.143	0.00131
A_24_P267997	D	TOR1AIP1	torsin A interacting protein 1	0.157	0.00131
A_23_P131825		TNNC2	troponin C type 2 (fast)	0.222	0.00132
A_24_P811704	D	PPFIBP1	PTPRF interacting protein, binding protein 1 (liprin beta 1)	-0.244	0.00133
A_24_P290373		CXorf56	chromosome X open reading frame 56	0.177	0.00133
A_23_P57760		PXYLP1	2-phosphoxylose phosphatase 1	0.196	0.00134
A_24_P307306				-0.31	0.00135
A_21_P0001773	D	LINC01119	long intergenic non-protein coding RNA 1119	-0.199	0.00135
A_23_P170733		ANTXR2	anthrax toxin receptor 2	0.146	0.00135
A_23_P146077		ZNF395	zinc finger protein 395	0.156	0.00135
A_23_P92410		CASP3	caspase 3	0.109	0.00137
A_33_P3370812		TBC1D1	TBC1 domain family member 1	-0.294	0.00138
A_33_P3271480		LOC90784	uncharacterized LOC90784	-0.185	0.00139
A_33_P3416574		AIG1	androgen-induced 1	0.129	0.00139
A_24_P322369		VPS4B	vacuolar protein sorting 4 homolog B (S. cerevisiae)	0.144	0.0014
A_23_P63032		GUCA2B	guanylate cyclase activator 2B	0.244	0.0014
A_23_P87545		IFITM3	interferon induced transmembrane protein 3	0.117	0.00141
A_21_P0007429	D	NCR3LG1	natural killer cell cytotoxicity receptor 3 ligand 1	-0.222	0.00142
A_33_P3648597		LOC283075	uncharacterized LOC283075	0.155	0.00143
A_33_P3415500	D	TRIO	trio Rho guanine nucleotide exchange factor	-0.178	0.00144
A_23_P207319		MAP3K14	mitogen-activated protein kinase kinase kinase 14	-0.151	0.00145
A_33_P3503937		LOC284581	uncharacterized LOC284581	-0.496	0.00146
A_24_P238143		LRRC37A3 (includes others)	leucine-rich repeat containing 37 member A3	-0.234	0.00146
A_32_P151823		OXR1	oxidation resistance 1	-0.21	0.00146
A_23_P422044		PCDHGA2	protocadherin gamma subfamily A, 2	-0.206	0.00146
A_23_P71530		TNFRSF11B	tumor necrosis factor receptor superfamily member 11b	-0.197	0.00146
A_33_P3335386		FAM83G	family with sequence similarity 83 member G	-0.29	0.00147
A_24_P58529	D	TUBA1C	tubulin alpha 1c	-0.212	0.00147
A_33_P3315763				-0.239	0.00148
A_23_P404094		THAP7-AS1	THAP7 antisense RNA 1	0.15	0.00148
A_33_P3335999		B4GALT3	UDP-Gal:betaGlcNAc beta 1,4- galactosyltransferase, polypeptide 3	0.106	0.00149
A_23_P345460	D	PLEKHG4	pleckstrin homology and RhoGEF domain containing G4	-0.391	0.00151
A_33_P3366124		KANTR	KDM5C adjacent non-coding transcript	-0.162	0.00151
A_23_P8240		FAM50B	family with sequence similarity 50 member B	0.159	0.00151
A_23_P34144		MAGEH1	MAGE family member H1	0.186	0.00151
A_32_P131367	D	RNF13	ring finger protein 13	0.154	0.00152
A_23_P200493		LBR	lamin B receptor	0.186	0.00153
A_33_P3389298		ZNF30	zinc finger protein 30	0.162	0.00154
A_23_P33407	D	HERC2	HECT and RLD domain containing E3 ubiquitin protein ligase 2	-0.16	0.00155
A_24_P322741		IL10RB	interleukin 10 receptor subunit beta	0.159	0.00155
A_24_P399362		PSMG2	proteasome (prosome, macropain) assembly chaperone 2	0.126	0.00156
A_23_P316974		SYNJ2	synaptojanin 2	-0.28	0.00157
A_24_P131392		RMDN2	regulator of microtubule dynamics 2	0.205	0.00157
A_23_P351275	D	UPP1	uridine phosphorylase 1	-0.307	0.00158
A_21_P0005248				0.369	0.00158
A_23_P333683		IGSF10	immunoglobulin superfamily member 10	0.245	0.00159
A_23_P33072		MAF1	MAF1 homolog, negative regulator of RNA polymerase III	0.186	0.0016
A_33_P3310864				0.203	0.00161
A_33_P3310232		L2HGDH	L-2-hydroxyglutarate dehydrogenase	-0.404	0.00162
A_23_P148959		TM2D1	TM2 domain containing 1	0.139	0.00162
A_23_P165788		PHOSPHO2	phosphatase, orphan 2	0.244	0.00163
A_33_P3322328	D	EPS15	epidermal growth factor receptor pathway substrate 15	0.138	0.00166
A_24_P926195		MAN1A2	mannosidase, alpha, class 1A, member 2	0.139	0.00166
A_21_P0009131				0.27	0.00166
A_33_P3267186		ATP2B1	ATPase, Ca++ transporting, plasma membrane 1	-0.22	0.00167
A_33_P3313145		ITIH3	inter-alpha-trypsin inhibitor heavy chain 3	-0.223	0.00168
A_23_P29922		TLR3	toll-like receptor 3	0.213	0.00168
A_33_P3406493		GABBR2	gamma-aminobutyric acid (GABA) B receptor, 2	-0.388	0.00169
A_23_P115792		PLEKHA1	pleckstrin homology domain containing A1	-0.173	0.00169
A_24_P383609		NANOS1	nanos homolog 1 (Drosophila)	0.181	0.00169
A_33_P3267263		RNVU1-18	RNA, variant U1 small nuclear 18	0.188	0.00171
A_33_P3220919		ADRBK2	adrenergic, beta, receptor kinase 2	-0.199	0.00173
A_23_P141362		FZD2	frizzled class receptor 2	0.139	0.00173
A_33_P3354940	D	CSF1	colony stimulating factor 1	0.172	0.00174
A_32_P225355		CPEB2	cytoplasmic polyadenylation element binding protein 2	-0.175	0.00175
A_23_P250735		CBX7	chromobox 7	0.223	0.00175
A_24_P364807		LPCAT2	lysophosphatidylcholine acyltransferase 2	0.249	0.00175
A_33_P3252333	D	SNORD3B-1	small nucleolar RNA, C/D box 3B-1	-0.407	0.00176
A_32_P66364		PPP1R1C	protein phosphatase 1 regulatory inhibitor subunit 1C	0.278	0.00176
A_21_P0000332		SNORA45B	small nucleolar RNA, H/ACA box 3B	0.252	0.00177
A_33_P3382856	D	DCN	decorin	0.284	0.00177
A_23_P391396		EBF3	early B-cell factor 3	0.161	0.00178
A_33_P3214665		MAP2	microtubule associated protein 2	-0.24	0.0018
A_23_P55477		ADORA2B	adenosine A2b receptor	-0.238	0.0018
A_23_P13772		TBX3	T-box 3	-0.172	0.00181
A_23_P415706		ADGRD1	adhesion G protein-coupled receptor D1	0.244	0.00181
A_33_P3285260		C21orf33/LOC102724023	chromosome 21 open reading frame 33	-0.291	0.00182
A_23_P1552		CTSC	cathepsin C	0.202	0.00182
A_33_P3319870		GREM1	gremlin 1, DAN family BMP antagonist	-0.357	0.00183
A_33_P3363485		SOBP	sine oculis binding protein homolog	-0.207	0.00183
A_23_P33791		SSBP2	single-stranded DNA binding protein 2	0.178	0.00185
A_24_P303989	D	BMI1	BMI1 proto-oncogene, polycomb ring finger	-0.198	0.00186
A_21_P0014351		SP2-AS1	SP2 antisense RNA 1	0.208	0.00186
A_32_P29784	D	TPM3	tropomyosin 3	-0.159	0.00187
A_23_P17880		DNAL4	dynein, axonemal, light chain 4	0.197	0.00188
A_33_P3392177		CLIC5	chloride intracellular channel 5	-0.181	0.0019
A_23_P5742		CCDC121	coiled-coil domain containing 121	0.245	0.0019
A_23_P47614		PHLDA2	pleckstrin homology-like domain, family A, member 2	-0.281	0.00191
A_21_P0014252		ZEB1-AS1	ZEB1 antisense RNA 1	0.162	0.00191
A_23_P210763		JAG1	jagged 1	0.186	0.00191
A_33_P3413355		CHST1	carbohydrate (keratan sulfate Gal-6) sulfotransferase 1	-0.282	0.00192
A_33_P3339051		ZNF428	zinc finger protein 428	0.162	0.00192
A_33_P3226955				-0.211	0.00193
A_33_P3364869	D	NAMPT	nicotinamide phosphoribosyltransferase	-0.36	0.00194
A_23_P170453		CST5	cystatin D	0.182	0.00194
A_21_P0009305				0.28	0.00194
A_33_P3318852		TBC1D8B	TBC1 domain family member 8B	-0.195	0.00196
A_19_P00320723	D	SRP14-AS1	SRP14 antisense RNA1 (head to head)	0.259	0.00196
A_24_P333571		ARHGAP29	Rho GTPase activating protein 29	-0.366	0.00198
A_33_P3340490		FLJ46906	uncharacterized LOC441172	-0.247	0.00198
A_24_P211206	D	TPM3	tropomyosin 3	-0.17	0.00198
A_33_P3238157		MYO18A	myosin XVIIIA	-0.16	0.00198
A_23_P320658		BUB3	BUB3 mitotic checkpoint protein	-0.145	0.00199
A_23_P434301		PTMA	prothymosin, alpha	0.13	0.00199
A_33_P3258452		TIGAR	TP53 induced glycolysis regulatory phosphatase	0.184	0.00199
A_32_P66035		TMEM86A	transmembrane protein 86A	0.221	0.00199
A_32_P83465	D	NBPF15 (includes others)	neuroblastoma breakpoint family member 15	-0.24	0.00201
A_21_P0011343	D	LOC100128108	putative ubiquitin-conjugating enzyme E2Q2-like protein	0.173	0.00203
A_21_P0000034	D	COX11	COX11 cytochrome c oxidase copper chaperone	0.149	0.00204
A_23_P29851		LRPAP1	LDL receptor related protein associated protein 1	0.161	0.00204
A_23_P121637		PRSS12	protease, serine 12	-0.178	0.00205
A_24_P381505	D	GLIPR1L2	GLI pathogenesis-related 1 like 2	0.236	0.00206
A_33_P3345210		TLCD2	TLC domain containing 2	0.239	0.00207
A_23_P21092		CALB2	calbindin 2	-0.471	0.00208
A_24_P283341		MICAL1	microtubule associated monooxygenase, calponin and LIM domain containing 1	-0.19	0.00208
A_24_P465772		RPSAP52	ribosomal protein SA pseudogene 52	-0.192	0.00209
A_23_P106682	D	EMP2	epithelial membrane protein 2	0.114	0.00209
A_23_P117852		KIAA0101	KIAA0101	-0.184	0.0021
A_23_P138105		MED18	mediator complex subunit 18	0.218	0.0021
A_33_P3419339		GNAI3	guanine nucleotide binding protein (G protein), alpha inhibiting activity polypeptide 3	-0.204	0.00211
A_23_P6490		TNRC6B	trinucleotide repeat containing 6B	-0.172	0.00211
A_33_P3228266		CST3	cystatin C	0.181	0.00211
A_21_P0014771				-0.259	0.00213
A_24_P382026		MIF4GD	MIF4G domain containing	0.177	0.00213
A_21_P0014918		HERC2P4	hect domain and RLD 2 pseudogene 4	0.192	0.00213
A_33_P3245439	D	CD40	CD40 molecule	0.229	0.00214
A_33_P3357658	D	HMGA2	high mobility group AT-hook 2	-0.327	0.00216
A_23_P15944		ELAC1	elaC ribonuclease Z 1	0.186	0.00216
A_24_P169544		ZNF17	zinc finger protein 17	0.189	0.00216
A_21_P0008622		IVD	isovaleryl-CoA dehydrogenase	0.201	0.00216
A_23_P8558		ABHD11	abhydrolase domain containing 11	-0.15	0.00217
A_23_P24104	D	PLAU	plasminogen activator, urokinase	0.187	0.00217
A_24_P185186		SAMD14	sterile alpha motif domain containing 14	0.21	0.00218
A_33_P3822503		CTF1	cardiotrophin 1	0.212	0.00218
A_23_P73420		TRAPPC9	trafficking protein particle complex 9	0.131	0.00219
A_23_P147641		TCEA2	transcription elongation factor A (SII), 2	0.139	0.0022
A_23_P104996		BEST1	bestrophin 1	0.181	0.0022
A_24_P354615		MTMR12	myotubularin related protein 12	0.196	0.00221
A_23_P214026		FBN2	fibrillin 2	-0.261	0.00222
A_19_P00322793	D	LINC00963	long intergenic non-protein coding RNA 963	0.176	0.00222
A_24_P62505		COLGALT2	collagen beta(1-O)galactosyltransferase 2	0.304	0.00222
A_23_P143526		S100B	S100 calcium binding protein B	-0.293	0.00224
A_23_P348159	D	DST	dystonin	-0.338	0.00225
A_23_P251421		CDCA7	cell division cycle associated 7	-0.276	0.00225
A_24_P743869	D	BBIP1	BBSome interacting protein 1	0.185	0.00225
A_23_P340890		THAP3	THAP domain containing, apoptosis associated protein 3	0.17	0.00226
A_33_P3386765	D	ABHD14A	abhydrolase domain containing 14A	0.212	0.00228
A_23_P20558	D	CDC37L1	cell division cycle 37-like 1	0.206	0.0023
A_21_P0010565	D	SMS	spermine synthase	-0.147	0.00231
A_23_P64630		RNF26	ring finger protein 26	0.1	0.00231
A_23_P152066		UBR1	ubiquitin protein ligase E3 component n-recognin 1	0.13	0.00232
A_23_P313632		FUT8	fucosyltransferase 8 (alpha (1,6) fucosyltransferase)	0.233	0.00232
A_21_P0011744		LINC00665	long intergenic non-protein coding RNA 665	0.172	0.00233
A_33_P3408054		HSP90AB2P	heat shock protein 90kDa alpha family class B member 2, pseudogene	-0.289	0.00234
A_33_P3404954		SLC38A6	solute carrier family 38 member 6	-0.141	0.00234
A_32_P132317		GPR155	G protein-coupled receptor 155	0.212	0.00234
A_33_P3341601		WDR86	WD repeat domain 86	0.373	0.00235
A_32_P175739		HK2	hexokinase 2	-0.193	0.00237
A_23_P129801		RAB40B	RAB40B, member RAS oncogene family	0.143	0.00237
A_33_P3325355		TOMM34	translocase of outer mitochondrial membrane 34	-0.167	0.00239
A_33_P3228435		FXYD1	FXYD domain containing ion transport regulator 1	0.248	0.00239
A_23_P13899		GAPDH	glyceraldehyde-3-phosphate dehydrogenase	-0.16	0.00241
A_23_P405148		MFF	mitochondrial fission factor	-0.134	0.00241
A_23_P113317		P4HTM	prolyl 4-hydroxylase, transmembrane (endoplasmic reticulum)	0.123	0.00241
A_33_P3318187	D	CENPBD1	CENPB DNA-binding domain containing 1	0.16	0.00241
A_23_P200239		YIPF1	Yip1 domain family member 1	0.169	0.00241
A_32_P196263		ADAMTS9	ADAM metallopeptidase with thrombospondin type 1 motif 9	0.206	0.00241
A_33_P3342807				-0.355	0.00242
A_23_P29630		SPCS1	signal peptidase complex subunit 1	0.118	0.00242
A_23_P122464		ZSCAN9	zinc finger and SCAN domain containing 9	0.147	0.00242
A_23_P300033		PDGFRA	platelet derived growth factor receptor alpha	0.173	0.00242
A_23_P71328		MATN2	matrilin 2	0.304	0.00242
A_33_P3308534		OSBPL1A	oxysterol binding protein like 1A	-0.2	0.00243
A_33_P3375809		LOC729970	hCG2028352-like	0.225	0.00243
A_23_P202720		SLC35C1	solute carrier family 35 (GDP-fucose transporter), member C1	0.14	0.00244
A_21_P0011016	D	LOC643733	caspase 4, apoptosis-related cysteine peptidase pseudogene	-0.124	0.00245
A_19_P00320028	D	LINC01004	long intergenic non-protein coding RNA 1004	-0.305	0.00248
A_33_P3344951		JMJD7	jumonji domain containing 7	0.165	0.00249
A_21_P0007572				-0.263	0.0025
A_33_P3225983				-0.364	0.00251
A_19_P00318418		TBXAS1	thromboxane A synthase 1	-0.185	0.00253
A_23_P88069		LHFP	lipoma HMGIC fusion partner	0.178	0.00253
A_23_P50946		RAMP1	receptor (G protein-coupled) activity modifying protein 1	-0.298	0.00254
A_21_P0014626	D	RNF13	ring finger protein 13	0.15	0.00254
A_24_P29975		ARPC5L	actin related protein 2/3 complex subunit 5-like	-0.137	0.00256
A_24_P289139	D	SH3KBP1	SH3-domain kinase binding protein 1	-0.209	0.00257
A_24_P194081		FXYD5	FXYD domain containing ion transport regulator 5	-0.141	0.00258
A_32_P180958	D	PCYOX1	prenylcysteine oxidase 1	0.22	0.00258
A_33_P3338733		MITF	microphthalmia-associated transcription factor	0.163	0.00259
A_21_P0000251		SNORA65	small nucleolar RNA, H/ACA box 65	0.265	0.00259
A_33_P3257903		GSTA4	glutathione S-transferase alpha 4	0.117	0.00263
A_33_P3320062		PLD1	phospholipase D1	0.17	0.00263
A_19_P00317108		LINC00657	non-coding RNA activated by DNA damage	0.152	0.00264
A_33_P3248394	D	INMT	indolethylamine N-methyltransferase	0.417	0.0027
A_21_P0000307		SNORA2B	small nucleolar RNA, H/ACA box 2B	0.369	0.00272
A_23_P501339		CDIPT	CDP-diacylglycerol--inositol 3-phosphatidyltransferase	0.12	0.00274
A_33_P3257140	D	ROCK2	Rho-associated, coiled-coil containing protein kinase 2	0.166	0.00274
A_24_P397386		LIFR	leukemia inhibitory factor receptor alpha	0.208	0.00274
A_21_P0011938	D	ANKRD36B	ankyrin repeat domain 36B	-0.259	0.00275
A_23_P332908		ZFC3H1	zinc finger, C3H1-type containing	-0.173	0.00275
A_24_P381555		SAP18	Sin3A associated protein 18kDa	0.154	0.00275
A_23_P206760		HP	haptoglobin	-0.251	0.00277
A_32_P63848		OXCT1	3-oxoacid CoA-transferase 1	-0.204	0.00277
A_24_P394368		WDR19	WD repeat domain 19	0.196	0.00277
A_23_P251562		TUSC2	tumor suppressor candidate 2	0.118	0.00278
A_21_P0000365		SNORD12	small nucleolar RNA, C/D box 12	0.25	0.00278
A_23_P374767		UBE2D4	ubiquitin conjugating enzyme E2D 4 (putative)	0.122	0.00281
A_23_P71752		ZFAND5	zinc finger, AN1-type domain 5	0.16	0.00281
A_33_P3290296	D	BBIP1	BBSome interacting protein 1	-0.307	0.00282
A_23_P24987		TSPAN31	tetraspanin 31	0.134	0.00282
A_24_P390833		MPPE1	metallophosphoesterase 1	0.208	0.00284
A_33_P3336273		NAV3	neuron navigator 3	-0.263	0.00285
A_33_P3382147		STARD13	StAR related lipid transfer domain containing 13	-0.346	0.00286
A_23_P250294		ABHD5	abhydrolase domain containing 5	0.185	0.00286
A_23_P48307		PABPC3	poly(A) binding protein, cytoplasmic 3	-0.239	0.00288
A_21_P0011301		WHAMMP2	WAS protein homolog associated with actin, golgi membranes and microtubules pseudogene 2	-0.157	0.0029
A_33_P3273148		GADD45GIP1	GADD45G interacting protein 1	-0.115	0.00291
A_24_P175059		ATG5	autophagy related 5	0.239	0.00292
A_33_P3301940		PDE7B	phosphodiesterase 7B	-0.201	0.00293
A_23_P67725		LMNB2	lamin B2	-0.174	0.00293
A_24_P42014				-0.133	0.00294
A_33_P3348313		ELP6	elongator acetyltransferase complex subunit 6	0.164	0.00294
A_24_P322229		RASL10B	RAS-like family 10 member B	0.24	0.00294
A_24_P179816		SLC27A3	solute carrier family 27 (fatty acid transporter), member 3	0.193	0.00296
A_21_P0000772		OSER1-AS1	OSER1 antisense RNA 1 (head to head)	0.204	0.00296
A_23_P389907		ATXN2	ataxin 2	-0.119	0.00297
A_33_P3216955		ANAPC16	anaphase promoting complex subunit 16	0.177	0.003
A_23_P216556		EPB41L4B	erythrocyte membrane protein band 4.1 like 4B	0.254	0.003
A_33_P3219429		SMNDC1	survival motor neuron domain containing 1	0.196	0.00301
A_33_P3344831		TMEM45A	transmembrane protein 45A	0.137	0.00302
A_21_P0012452				-0.143	0.00303
A_33_P3320762		ATXN3	ataxin 3	0.161	0.00303
A_24_P122921		BCL2L11	BCL2 like 11	0.272	0.00303
A_23_P404606		CREBRF	CREB3 regulatory factor	0.138	0.00304
A_32_P209208		CAPS2	calcyphosine 2	0.203	0.00305
A_23_P153360		SMIM7	small integral membrane protein 7	0.134	0.00306
A_24_P627306		EDEM2	ER degradation enhancer, mannosidase alpha-like 2	0.175	0.00306
A_21_P0012674				0.18	0.00307
A_23_P75299		LHPP	phospholysine phosphohistidine inorganic pyrophosphate phosphatase	0.138	0.0031
A_23_P87560		BTG1	B-cell translocation gene 1, anti-proliferative	0.205	0.0031
A_24_P913115		PTEN	phosphatase and tensin homolog	0.207	0.0031
A_23_P78152		MIS12	MIS12 kinetochore complex component	0.126	0.00313
A_23_P209694		PAPOLG	poly(A) polymerase gamma	0.152	0.00313
A_23_P58251		CPZ	carboxypeptidase Z	0.219	0.00313
A_24_P402779		PARP3	poly(ADP-ribose) polymerase family member 3	0.189	0.00314
A_33_P3215640		PI16	peptidase inhibitor 16	0.266	0.00314
A_33_P3366073		EBPL	emopamil binding protein-like	-0.253	0.00315
A_33_P3298942		ATP10B	ATPase, class V, type 10B	-0.171	0.00315
A_33_P3318459		SUMO1	small ubiquitin-like modifier 1	0.138	0.00315
A_33_P3238007		LARP1B	La ribonucleoprotein domain family member 1B	-0.211	0.00316
A_23_P166686		AMOTL2	angiomotin like 2	0.141	0.00316
A_33_P3371752	D	EPS15	epidermal growth factor receptor pathway substrate 15	-0.393	0.00319
A_33_P3211520		SNAP47	synaptosome associated protein 47kDa	0.155	0.00319
A_21_P0010830		SGMS1-AS1	SGMS1 antisense RNA 1	0.297	0.00319
A_21_P0011939				-0.374	0.00322
A_33_P3360525				-0.235	0.00322
A_23_P393727		NRP2	neuropilin 2	0.247	0.00322
A_33_P3369452		TANGO2	transport and golgi organization 2 homolog	-0.138	0.00323
A_23_P304682	D	EMP2	epithelial membrane protein 2	0.164	0.00324
A_23_P254165		RAI2	retinoic acid induced 2	0.258	0.00324
A_19_P00802201				-0.202	0.00325
A_33_P3280044	D	ANKRD11	ankyrin repeat domain 11	-0.156	0.00326
A_23_P207387		GHDC	GH3 domain containing	0.155	0.00326
A_24_P409881				-0.143	0.00327
A_33_P3280385	D	COL6A3	collagen, type VI, alpha 3	-0.2	0.00328
A_23_P128956		ZFYVE1	zinc finger, FYVE domain containing 1	0.11	0.00328
A_23_P204696	D	CDKN1B	cyclin-dependent kinase inhibitor 1B (p27, Kip1)	0.176	0.00329
A_24_P397584		TBCC	tubulin folding cofactor C	0.108	0.0033
A_24_P243749		PDK4	pyruvate dehydrogenase kinase 4	0.279	0.0033
A_23_P12082		CHI3L2	chitinase 3 like 2	-0.628	0.00331
A_23_P30464		PRR7	proline rich 7 (synaptic)	-0.19	0.00331
A_23_P400378		GPBAR1	G protein-coupled bile acid receptor 1	0.28	0.00331
A_23_P145584		UBE2H	ubiquitin conjugating enzyme E2H	0.129	0.00332
A_23_P351757		PLCD3	phospholipase C delta 3	0.156	0.00332
A_23_P39024		WDR83	WD repeat domain 83	0.175	0.00333
A_23_P134041		TBX18	T-box 18	0.214	0.00335
A_24_P860797		PAIP2B	poly(A) binding protein interacting protein 2B	0.223	0.00335
A_23_P251259		GTF2H4	general transcription factor IIH subunit 4	0.189	0.00337
A_33_P3236267	D	LINC00504		-0.407	0.00338
A_21_P0000572		PITPNA-AS1	PITPNA antisense RNA 1	0.134	0.00339
A_33_P3372069		COX8C	cytochrome c oxidase subunit VIIIC	0.276	0.00339
A_23_P427502		ZNRF3	zinc and ring finger 3	0.23	0.00342
A_23_P44264		EMX2	empty spiracles homeobox 2	0.114	0.00343
A_23_P69242		SUMF1	sulfatase modifying factor 1	0.144	0.00346
A_33_P3239184				-0.236	0.00347
A_23_P331908		LOC101060179	uncharacterized LOC101060179	0.181	0.00347
A_33_P3263523		C1orf35	chromosome 1 open reading frame 35	-0.193	0.00348
A_23_P41854	D	CARD6	caspase recruitment domain family member 6	0.128	0.00348
A_23_P60166		DEPTOR	DEP domain containing MTOR-interacting protein	0.178	0.00348
A_33_P3317576		DHFRL1	dihydrofolate reductase like 1	0.186	0.00348
A_23_P338233		BCDIN3D	BCDIN3 domain containing RNA methyltransfease	0.166	0.00351
A_24_P244952		SMG1	SMG1 phosphatidylinositol 3-kinase-related kinase	-0.219	0.00352
A_23_P162037		ARNTL	aryl hydrocarbon receptor nuclear translocator like	0.145	0.00352
A_23_P200222		LRP8	LDL receptor related protein 8	-0.199	0.00353
A_23_P159893	D	CHRDL1	chordin-like 1	0.128	0.00353
A_33_P3353816		ITGA4	integrin subunit alpha 4	-0.179	0.00354
A_33_P3247644	D	MTURN	maturin, neural progenitor differentiation regulator homolog (Xenopus)	0.197	0.00355
A_24_P358305				-0.351	0.00357
A_23_P84070		LARP7	La ribonucleoprotein domain family member 7	0.157	0.00357
A_24_P324405	D	ANKRD11	ankyrin repeat domain 11	-0.209	0.00361
A_24_P823684	D	HSP90AB1	heat shock protein 90kDa alpha family class B member 1	-0.177	0.00361
A_33_P3441060		TMEM242	transmembrane protein 242	0.15	0.00361
A_33_P3311285	D	LMNA	lamin A/C	-0.137	0.00362
A_19_P00320796	D	TUG1	taurine up-regulated 1 (non-protein coding)	-0.133	0.00362
A_23_P57059		STAU1	staufen double-stranded RNA binding protein 1	0.106	0.00363
A_24_P239731		B4GALT5	UDP-Gal:betaGlcNAc beta 1,4- galactosyltransferase, polypeptide 5	0.15	0.00363
A_23_P111865		ZSCAN21	zinc finger and SCAN domain containing 21	0.147	0.00364
A_33_P3354539		CHURC1	churchill domain containing 1	0.155	0.00364
A_33_P3336968	D	TRNT1	tRNA nucleotidyl transferase, CCA-adding, 1	0.147	0.00365
A_23_P487		UCK2	uridine-cytidine kinase 2	-0.175	0.00366
A_23_P39076		RRAS	related RAS viral (r-ras) oncogene homolog	0.139	0.00366
A_23_P337917	D	PPFIBP1	PTPRF interacting protein, binding protein 1 (liprin beta 1)	-0.203	0.00367
A_24_P314179		ETS2	v-ets avian erythroblastosis virus E26 oncogene homolog 2	-0.212	0.00368
A_24_P32085		MOB3B	MOB kinase activator 3B	0.205	0.00369
A_23_P49768		MRPL27	mitochondrial ribosomal protein L27	-0.12	0.00371
A_24_P200427		PAICS	phosphoribosylaminoimidazole carboxylase; phosphoribosylaminoimidazolesuccinocarboxamide synthase	-0.116	0.00373
A_24_P160104		TUBA8	tubulin alpha 8	0.256	0.00373
A_23_P151459		MYCBP2	MYC binding protein 2, E3 ubiquitin protein ligase	-0.166	0.00374
A_33_P3356210	D	NCR3LG1	natural killer cell cytotoxicity receptor 3 ligand 1	-0.178	0.00375
A_19_P00320804		LOC102724030	uncharacterized LOC102724030	0.231	0.00377
A_23_P165657		SLC20A1	solute carrier family 20 (phosphate transporter), member 1	-0.331	0.00381
A_33_P3481987		SLC16A12	solute carrier family 16 member 12	-0.21	0.00381
A_21_P0009442		GAPLINC	gastric adenocarcinoma associated, positive CD44 regulator, long intergenic non-coding RNA	-0.352	0.00384
A_23_P100196		USP10	ubiquitin specific peptidase 10	-0.143	0.00384
A_23_P57588		GTSE1	G2 and S-phase expressed 1	-0.225	0.00385
A_23_P311885		L3MBTL3	l(3)mbt-like 3 (Drosophila)	0.201	0.00386
A_23_P24192		RRP12	ribosomal RNA processing 12 homolog	-0.127	0.00387
A_23_P129101		HEXA	hexosaminidase A (alpha polypeptide)	0.176	0.00387
A_23_P162874		HSP90AA1	heat shock protein 90kDa alpha family class A member 1	-0.159	0.00388
A_33_P3405285		GSG1	germ cell associated 1	-0.436	0.0039
A_23_P258136		MXRA5	matrix-remodelling associated 5	0.238	0.0039
A_23_P53646		NAP1L1	nucleosome assembly protein 1-like 1	0.114	0.00392
A_24_P252497		TRIB1	tribbles pseudokinase 1	-0.172	0.00395
A_23_P57306		CHAF1B	chromatin assembly factor 1 subunit B	-0.171	0.00395
A_33_P3350853		PAXIP1-AS1	PAXIP1 antisense RNA 1 (head to head)	0.261	0.00395
A_24_P39101		KCTD10	potassium channel tetramerization domain containing 10	0.151	0.00396
A_23_P81912	D	TUBB	tubulin beta class I	-0.134	0.004
A_23_P25638		RNF219	ring finger protein 219	0.121	0.00402
A_21_P0011809		ANKRD36BP2	ankyrin repeat domain 36B pseudogene 2	-0.214	0.00403
A_23_P65830		HDDC3	HD domain containing 3	0.121	0.00404
A_23_P117694		CORO2B	coronin 2B	0.169	0.00405
A_32_P146659		ATP6V0E2-AS1	ATP6V0E2 antisense RNA 1	0.196	0.00406
A_23_P154022		C2orf44	chromosome 2 open reading frame 44	0.177	0.00408
A_23_P17855		TRIOBP	TRIO and F-actin binding protein	-0.145	0.00409
A_33_P3314386	D	TOR1AIP1	torsin A interacting protein 1	0.195	0.0041
A_23_P140748		NDRG4	NDRG family member 4	-0.175	0.00411
A_24_P158421		SAR1A	secretion associated, Ras related GTPase 1A	0.162	0.00411
A_24_P8318		AFF4	AF4/FMR2 family member 4	-0.189	0.00412
A_23_P317056		MT-ND6	NADH dehydrogenase, subunit 6 (complex I)	0.317	0.00413
A_23_P139929		ERP29	endoplasmic reticulum protein 29	0.131	0.00414
A_32_P129950		NHLRC3	NHL repeat containing 3	0.155	0.00414
A_23_P48581		C14orf93	chromosome 14 open reading frame 93	0.122	0.00416
A_21_P0000215		SNORD55	small nucleolar RNA, C/D box 55	0.187	0.00417
A_33_P3361152	D	LINC01119	long intergenic non-protein coding RNA 1119	-0.323	0.00418
A_33_P3423941		IFITM1	interferon induced transmembrane protein 1	0.13	0.00418
A_24_P349547				-0.161	0.0042
A_21_P0011808	D	ANKRD36	ankyrin repeat domain 36	-0.285	0.00422
A_24_P275828		PGAP3	post-GPI attachment to proteins 3	0.144	0.00423
A_33_P3277674		FBXL22	F-box and leucine-rich repeat protein 22	0.262	0.00423
A_21_P0003456				0.262	0.00426
A_24_P156576		GEMIN8	gem nuclear organelle associated protein 8	0.121	0.00427
A_33_P3279545		HIPK3	homeodomain interacting protein kinase 3	0.18	0.00427
A_33_P3387493		FTH1P18	ferritin, heavy polypeptide 1 pseudogene 18	0.212	0.00427
A_23_P201808		PLPP3	phospholipid phosphatase 3	0.299	0.00427
A_32_P191840				0.221	0.00428
A_21_P0011623				-0.352	0.00429
A_33_P3348239		FBN1	fibrillin 1	-0.153	0.00429
A_24_P34944		PCDHGA12	protocadherin gamma subfamily A, 12	-0.208	0.00431
A_23_P60354		SMARCA2	SWI/SNF related, matrix associated, actin dependent regulator of chromatin, subfamily a, member 2	0.141	0.00432
A_24_P223124		FNDC3B	fibronectin type III domain containing 3B	0.151	0.00432
A_33_P3368188		SEPT9	septin 9	-0.175	0.00433
A_24_P213354				-0.158	0.00434
A_23_P128744		BDKRB1	bradykinin receptor B1	-0.325	0.00436
A_33_P3349474				-0.3	0.00436
A_21_P0000851		LOC100507564	uncharacterized LOC100507564	0.242	0.00436
A_24_P416131		COTL1	coactosin-like F-actin binding protein 1	-0.261	0.00437
A_23_P303671	D	ECM2	extracellular matrix protein 2, female organ and adipocyte specific	0.145	0.00438
A_33_P3365805		CLN5	ceroid-lipofuscinosis, neuronal 5	0.115	0.00439
A_33_P3321025	D	PLXNA4	plexin A4	0.193	0.00439
A_33_P3397443		PKMYT1	protein kinase, membrane associated tyrosine/threonine 1	-0.174	0.0044
A_23_P1775		DPAGT1	dolichyl-phosphate (UDP-N-acetylglucosamine) N-acetylglucosaminephosphotransferase 1 (GlcNAc-1-P transferase)	-0.095	0.00441
A_24_P144499		PPIAL4G (includes others)	peptidylprolyl isomerase A like 4G	-0.164	0.00442
A_33_P3356711		ING3	inhibitor of growth family member 3	0.214	0.00442
A_23_P216429		ASPN	asporin	0.246	0.00442
A_23_P150609	D	IGF2	insulin like growth factor 2	0.577	0.00442
A_23_P25605		KBTBD7	kelch repeat and BTB (POZ) domain containing 7	0.21	0.00445
A_33_P3382229	D	TNNT3	troponin T type 3 (skeletal, fast)	0.402	0.00446
A_33_P3346331				-0.244	0.00448
A_24_P220485		OLFML2A	olfactomedin like 2A	-0.194	0.00448
A_33_P3237977		LARP6	La ribonucleoprotein domain family member 6	-0.207	0.00449
A_21_P0000642	D	LINC00959	long intergenic non-protein coding RNA 959	0.154	0.00449
A_33_P3762913	D	LINC01004	long intergenic non-protein coding RNA 1004	-0.333	0.0045
A_33_P3413855		C7orf60	chromosome 7 open reading frame 60	0.176	0.0045
A_24_P307175		SMYD4	SET and MYND domain containing 4	0.137	0.00451
A_23_P50646		PINLYP	phospholipase A2 inhibitor and LY6/PLAUR domain containing	0.201	0.00454
A_23_P207507	D	ABCC3	ATP binding cassette subfamily C member 3	-0.228	0.00455
A_24_P168925	D	CHRDL1	chordin-like 1	0.2	0.00455
A_23_P69497		CLEC3B	C-type lectin domain family 3 member B	0.429	0.00455
A_33_P3849275		FHL1	four and a half LIM domains 1	0.196	0.00456
A_21_P0003027				0.232	0.00456
A_23_P151497		TRMT61A	tRNA methyltransferase 61A	0.128	0.00457
A_33_P3329344		FASN	fatty acid synthase	-0.211	0.00458
A_33_P3311493		TRHDE-AS1	TRHDE antisense RNA 1	0.446	0.00459
A_33_P3395605		TMEM119	transmembrane protein 119	0.2	0.0046
A_23_P21409		CEP63	centrosomal protein 63kDa	0.109	0.00461
A_24_P125690		MRPL34	mitochondrial ribosomal protein L34	0.131	0.00461
A_23_P414519		NRN1	neuritin 1	0.165	0.00461
A_33_P3387145	D	SH3KBP1	SH3-domain kinase binding protein 1	-0.236	0.00462
A_33_P3280549				-0.162	0.00462
A_21_P0009837				0.329	0.00462
A_23_P340333		ITPRIP	inositol 1,4,5-trisphosphate receptor interacting protein	-0.285	0.00465
A_24_P80204		MALL	mal, T-cell differentiation protein-like	0.337	0.00465
A_33_P3293247		GPSM1	G-protein signaling modulator 1	-0.264	0.00466
A_23_P92602		ABCA11P	ATP binding cassette subfamily A member 11, pseudogene	-0.248	0.00466
A_24_P143492		BCAS4	breast carcinoma amplified sequence 4	-0.161	0.00466
A_32_P78681		GLP2R	glucagon-like peptide 2 receptor	0.192	0.00466
A_23_P127824	D	TNNT3	troponin T type 3 (skeletal, fast)	0.397	0.00467
A_23_P110005		NICN1	nicolin 1	0.185	0.00469
A_23_P310		MARCKSL1	MARCKS-like 1	0.186	0.00469
A_33_P3223116	D	HIPK2	homeodomain interacting protein kinase 2	-0.193	0.00471
A_33_P3264662		CYP27C1	cytochrome P450 family 27 subfamily C member 1	0.288	0.00471
A_24_P256063				-0.411	0.00472
A_21_P0004789				0.187	0.00472
A_24_P100613	D	LAMA1	laminin subunit alpha 1	-0.381	0.00473
A_24_P89843	D	CYHR1	cysteine/histidine-rich 1	0.105	0.00474
A_23_P320739		MEF2C	myocyte enhancer factor 2C	0.195	0.00475
A_21_P0012781				0.205	0.00475
A_21_P0000252		SNORD68	small nucleolar RNA, C/D box 68	0.204	0.00476
A_33_P3354564		GPD2	glycerol-3-phosphate dehydrogenase 2	-0.192	0.00477
A_21_P0001879		MOB1A	MOB kinase activator 1A	0.164	0.00477
A_23_P82929		NOV	nephroblastoma overexpressed	-0.265	0.00478
A_33_P3280945		SNHG3	small nucleolar RNA host gene 3	-0.229	0.00479
A_33_P3349591		LOC100129461	LYRM4 antisense RNA 1	0.178	0.00481
A_32_P234604		PFN1	profilin 1	-0.173	0.00483
A_33_P3360097		APRT	adenine phosphoribosyltransferase	-0.166	0.00484
A_23_P51711		CELA2B	chymotrypsin like elastase family member 2B	0.212	0.00484
A_24_P194688		MICU3	mitochondrial calcium uptake family member 3	-0.176	0.00486
A_24_P330518		CA12	carbonic anhydrase XII	-0.324	0.00487
A_24_P347480		NEK9	NIMA related kinase 9	0.108	0.00487
A_24_P205589		ACOT7	acyl-CoA thioesterase 7	-0.194	0.00488
A_33_P3227716	D	GATSL3	GATS protein-like 3	0.155	0.00489
A_21_P0003678				0.167	0.00489
A_23_P72668		SDPR	serum deprivation response	-0.221	0.0049
A_24_P928052		NRP1	neuropilin 1	0.133	0.0049
A_24_P22976		ARRDC2	arrestin domain containing 2	0.18	0.0049
A_23_P106405		NDN	necdin, MAGE family member	0.103	0.00491
A_24_P205130		FNBP1	formin binding protein 1	-0.122	0.00492
A_33_P3287223		DPP4	dipeptidyl-peptidase 4	-0.332	0.00493
A_19_P00320842	D	C17orf51	chromosome 17 open reading frame 51	0.164	0.00494
A_21_P0000260		SNORD58A	small nucleolar RNA, C/D box 58A	0.216	0.00494
A_33_P3347452	D	RPS6KA2	ribosomal protein S6 kinase, 90kDa, polypeptide 2	0.129	0.00495
A_23_P144827		FBXL7	F-box and leucine-rich repeat protein 7	0.229	0.00495
A_23_P58328		ANXA10	annexin A10	-0.376	0.00497
A_23_P117146		PRDM4	PR domain containing 4	-0.095	0.00498
A_23_P103932		FGR	FGR proto-oncogene, Src family tyrosine kinase	-0.31	0.00499
A_32_P85539		HCFC2	host cell factor C2	0.18	0.005
A_19_P00328886	D	TUG1	taurine up-regulated 1 (non-protein coding)	-0.184	0.00503
A_33_P3380236		LOC105378753	uncharacterized LOC105378753	0.181	0.00503
A_33_P3269218		ADGRB2	adhesion G protein-coupled receptor B2	-0.16	0.00506
A_21_P0001959				-0.138	0.00507
A_24_P211565		C1QTNF6	C1q and tumor necrosis factor related protein 6	0.186	0.00509
A_23_P415401		KLF9	Kruppel-like factor 9	0.117	0.0051
A_33_P3350621		CNRIP1	cannabinoid receptor interacting protein 1	0.288	0.0051
A_21_P0000410		SNORD114-13	small nucleolar RNA, C/D box 114-13	-0.217	0.00511
A_24_P152094		LOC101060458	peptidyl-prolyl cis-trans isomerase A-like	-0.161	0.00511
A_23_P502553		TRIM35	tripartite motif containing 35	0.143	0.00511
A_24_P305764	D	SMS	spermine synthase	-0.145	0.00512
A_24_P77676		HSPA9	heat shock protein family A (Hsp70) member 9	-0.114	0.00512
A_32_P158083		LHFPL3	lipoma HMGIC fusion partner-like 3	0.421	0.00512
A_21_P0000135		ANKHD1/ANKHD1-EIF4EBP3	ankyrin repeat and KH domain containing 1	-0.2	0.00514
A_23_P422933		ARHGAP20	Rho GTPase activating protein 20	0.209	0.00516
A_24_P74508		SLC25A18	solute carrier family 25 (glutamate carrier), member 18	0.255	0.00519
A_33_P3240532		RGL1	ral guanine nucleotide dissociation stimulator-like 1	0.13	0.0052
A_33_P3412087		CCDC170	coiled-coil domain containing 170	0.199	0.0052
A_33_P3351101		TYSND1	trypsin domain containing 1	0.138	0.00521
A_33_P3405168		MMAA	methylmalonic aciduria (cobalamin deficiency) cblA type	0.179	0.00522
A_24_P392690				-0.11	0.00523
A_32_P157481	D	ERCC4	excision repair cross-complementation group 4	0.159	0.00523
A_23_P213441		UTP15	UTP15, U3 small nucleolar ribonucleoprotein, homolog (S. cerevisiae)	0.145	0.00524
A_23_P379034		BAIAP2L2	BAI1-associated protein 2-like 2	-0.214	0.00525
A_33_P3381305				-0.235	0.00526
A_23_P148475		KIF4A	kinesin family member 4A	-0.205	0.00526
A_23_P22352		FRMD4A	FERM domain containing 4A	-0.346	0.00527
A_33_P3346193	D	TPM3	tropomyosin 3	-0.231	0.00527
A_19_P00805840		ZNF37BP	zinc finger protein 37B, pseudogene	-0.156	0.00527
A_23_P118061		CKLF	chemokine-like factor	0.138	0.00527
A_24_P372134		TMEM140	transmembrane protein 140	0.164	0.0053
A_23_P16032		TRAPPC2B	trafficking protein particle complex 2B	0.105	0.00532
A_23_P329198		NABP1	nucleic acid binding protein 1	0.103	0.00533
A_23_P255601		TMEM185A	transmembrane protein 185A	0.116	0.00536
A_23_P166775		IL17RC	interleukin 17 receptor C	0.139	0.00537
A_33_P3219720	D	ZNF248	zinc finger protein 248	-0.331	0.00538
A_23_P42768	D	SRRM3	serine/arginine repetitive matrix 3	0.291	0.00539
A_19_P00317507		MAGI2-AS3	MAGI2 antisense RNA 3	-0.189	0.0054
A_23_P331700	D	SRRM3	serine/arginine repetitive matrix 3	0.216	0.0054
A_24_P245298		TNFSF12	tumor necrosis factor superfamily member 12	0.176	0.00541
A_24_P250650		RABL2A	RAB, member of RAS oncogene family-like 2A	0.126	0.00543
A_19_P00316629		PIEZO1	piezo-type mechanosensitive ion channel component 1	-0.211	0.00544
A_23_P38190		ORMDL3	ORMDL sphingolipid biosynthesis regulator 3	0.144	0.00545
A_24_P212481	D	MCTP1	multiple C2 domains, transmembrane 1	-0.225	0.00546
A_21_P0000369		SNORA16A	small nucleolar RNA, H/ACA box 16A	0.213	0.00546
A_21_P0000192		TGIF1	TGFB-induced factor homeobox 1	-0.179	0.0055
A_24_P332862		ZNF493	zinc finger protein 493	-0.177	0.0055
A_32_P36046	D	C2orf68	chromosome 2 open reading frame 68	0.181	0.0055
A_33_P3243707		KLHL20	kelch like family member 20	0.183	0.00552
A_33_P3403392		AACS	acetoacetyl-CoA synthetase	0.152	0.00553
A_23_P29257		H1F0	H1 histone family member 0	0.24	0.00554
A_23_P409626		HNRNPUL2	heterogeneous nuclear ribonucleoprotein U-like 2	0.27	0.00554
A_32_P47988		CAMK2D	calcium/calmodulin-dependent protein kinase II delta	-0.215	0.00555
A_23_P300076		IQCG	IQ motif containing G	0.215	0.00555
A_23_P216966		PTGS1	prostaglandin-endoperoxide synthase 1 (prostaglandin G/H synthase and cyclooxygenase)	-0.338	0.00556
A_23_P372308		RGMA	repulsive guidance molecule family member a	0.219	0.00556
A_23_P79134		PLEKHF1	pleckstrin homology and FYVE domain containing 1	0.164	0.00557
A_23_P105957		ACTN1	actinin, alpha 1	-0.246	0.00559
A_23_P100711		PMP22	peripheral myelin protein 22	0.14	0.0056
A_33_P3255499		SLC25A51	solute carrier family 25 member 51	-0.358	0.00562
A_24_P161293	D	NBPF15 (includes others)	neuroblastoma breakpoint family member 15	-0.263	0.00564
A_21_P0014894				0.158	0.00564
A_33_P3244818		RSBN1L	round spermatid basic protein 1-like	0.183	0.00567
A_23_P8196		ME1	malic enzyme 1, NADP(+)-dependent, cytosolic	-0.153	0.00571
A_32_P116271		WDFY3-AS2	WDFY3 antisense RNA 2	0.169	0.00571
A_19_P00323413	D	PTPN14	protein tyrosine phosphatase, non-receptor type 14	-0.129	0.00572
A_24_P90097		ADD3	adducin 3	0.271	0.00572
A_23_P111701		GNG11	guanine nucleotide binding protein (G protein), gamma 11	-0.171	0.00574
A_33_P3422429		INADL	InaD-like (Drosophila)	-0.27	0.00575
A_33_P3242623		SLC7A11	solute carrier family 7 (anionic amino acid transporter light chain, xc- system), member 11	-0.267	0.00575
A_23_P118427	D	MAP2K3	mitogen-activated protein kinase kinase 3	-0.158	0.00576
A_33_P3270668		FAM131B	family with sequence similarity 131 member B	0.218	0.00579
A_24_P743907		DNM1L	dynamin 1-like	-0.101	0.0058
A_24_P380022		EIF5A2	eukaryotic translation initiation factor 5A2	-0.14	0.00581
A_23_P368154		PODN	podocan	0.187	0.00581
A_23_P212511		TTC14	tetratricopeptide repeat domain 14	-0.181	0.00583
A_21_P0002228				-0.318	0.00585
A_33_P3243364	D	ERCC4	excision repair cross-complementation group 4	0.172	0.00585
A_21_P0011898		SEPT14	septin 14	0.21	0.00586
A_33_P3364498				0.231	0.00587
A_24_P14010		NMT1	N-myristoyltransferase 1	0.123	0.00588
A_23_P40217		DOK5	docking protein 5	-0.216	0.00589
A_23_P334709		FKBP9	FK506 binding protein 9	0.162	0.00589
A_21_P0000173		C5orf56	chromosome 5 open reading frame 56	0.19	0.00589
A_23_P381203		KIAA0556	KIAA0556	0.156	0.0059
A_23_P148308	D	RBM3	RNA binding motif (RNP1, RRM) protein 3	-0.264	0.00591
A_23_P317683		TRAPPC10	trafficking protein particle complex 10	0.147	0.00591
A_23_P68610		TPX2	TPX2, microtubule-associated	-0.157	0.00593
A_21_P0005818		LINC01605	long intergenic non-protein coding RNA 1605	0.163	0.00593
A_23_P167201		SEPSECS	Sep (O-phosphoserine) tRNA:Sec (selenocysteine) tRNA synthase	0.198	0.00595
A_23_P35645		RBM17	RNA binding motif protein 17	0.109	0.00596
A_33_P3220470		SMAD6	SMAD family member 6	0.197	0.00596
A_33_P3317880		ZNF252P	zinc finger protein 252, pseudogene	0.138	0.00602
A_33_P3350575		OC90	otoconin 90	0.215	0.00603
A_23_P206454	D	CENPBD1	CENPB DNA-binding domain containing 1	0.142	0.00604
A_23_P147109		TOR4A	torsin family 4, member A	0.314	0.00605
A_23_P259071		AREG	amphiregulin	-0.233	0.00606
A_23_P301247		HIST2H2AC	histone cluster 2, H2ac	0.183	0.00606
A_33_P3364180		FGD5	FYVE, RhoGEF and PH domain containing 5	0.229	0.00606
A_33_P3322125		DAZAP2	DAZ associated protein 2	0.161	0.00607
A_32_P101301		USP39	ubiquitin specific peptidase 39	0.103	0.00608
A_23_P419107		TCP11L2	t-complex 11, testis-specific-like 2	0.16	0.00608
A_23_P315364		CXCL2	chemokine (C-X-C motif) ligand 2	-0.253	0.0061
A_33_P3327961		ZNF615	zinc finger protein 615	0.171	0.0061
A_23_P157569	D	ADHFE1	alcohol dehydrogenase, iron containing 1	0.193	0.0061
A_33_P3223544	D	TMBIM4	transmembrane BAX inhibitor motif containing 4	0.11	0.00611
A_33_P3245348		KRTAP4-1	keratin associated protein 4-1	-0.267	0.00612
A_24_P307827		WHAMM	WAS protein homolog associated with actin, golgi membranes and microtubules	0.189	0.00614
A_32_P128701	D	USP53	ubiquitin specific peptidase 53	0.238	0.00614
A_33_P3227345	D	FKBP1A	FK506 binding protein 1A	-0.165	0.00617
A_33_P3407835		PPM1M	protein phosphatase, Mg2+/Mn2+ dependent 1M	0.17	0.00618
A_21_P0013784				-0.163	0.00619
A_33_P3346348		TBC1D31	TBC1 domain family member 31	0.246	0.00619
A_33_P3314276		ASPHD1	aspartate beta-hydroxylase domain containing 1	-0.194	0.00625
A_21_P0004989				0.158	0.00625
A_23_P380857		APOL4	apolipoprotein L4	0.227	0.00625
A_23_P82206		ECHDC1	ethylmalonyl-CoA decarboxylase 1	-0.178	0.00627
A_21_P0011615		ALOX12P2	arachidonate 12-lipoxygenase pseudogene 2	0.231	0.00629
A_21_P0011551				-0.139	0.0063
A_21_P0000090		TSFM	Ts translation elongation factor, mitochondrial	0.136	0.00631
A_23_P127394		CRY2	cryptochrome circadian clock 2	0.174	0.00631
A_19_P00316325	D	LINC01278	long intergenic non-protein coding RNA 1278	-0.19	0.00632
A_32_P208424		H3F3A/H3F3B	H3 histone, family 3A	0.173	0.00633
A_33_P3215864		FAM3A	family with sequence similarity 3 member A	0.16	0.00637
A_19_P00321670				-0.212	0.00638
A_21_P0000129		DCLK1	doublecortin like kinase 1	0.222	0.00638
A_33_P3399935	D	RPS6KA2	ribosomal protein S6 kinase, 90kDa, polypeptide 2	0.134	0.00639
A_33_P3559138				-0.301	0.0064
A_24_P294832		PTP4A1	protein tyrosine phosphatase type IVA, member 1	-0.167	0.0064
A_33_P3220565		UBTD2	ubiquitin domain containing 2	0.127	0.0064
A_33_P3454679		HAB1	B1 for mucin	-0.206	0.00641
A_23_P70060		PLPP1	phospholipid phosphatase 1	0.154	0.00642
A_23_P215070		CEP41	centrosomal protein 41kDa	-0.201	0.00645
A_23_P208143		ZNF397	zinc finger protein 397	0.148	0.00646
A_23_P211957		TGFBR2	transforming growth factor beta receptor II	0.176	0.00646
A_21_P0012537				-0.187	0.00647
A_33_P3345354		RRNAD1	ribosomal RNA adenine dimethylase domain containing 1	0.148	0.00647
A_33_P3251640		LINC00663	long intergenic non-protein coding RNA 663	0.255	0.00647
A_33_P3331491		LOC728392	uncharacterized LOC728392	0.189	0.00649
A_21_P0010724		LOC645166	lymphocyte-specific protein 1 pseudogene	-0.2	0.00651
A_24_P933492		ZDHHC21	zinc finger, DHHC-type containing 21	-0.174	0.00652
A_23_P399501		PKM	pyruvate kinase, muscle	-0.146	0.00652
A_23_P43095		ZFHX4	zinc finger homeobox 4	-0.145	0.00654
A_23_P133585		CDK7	cyclin-dependent kinase 7	-0.137	0.00655
A_23_P128706		DYNC1H1	dynein, cytoplasmic 1, heavy chain 1	-0.171	0.00656
A_23_P56529		AAMP	angio associated migratory cell protein	0.121	0.00656
A_23_P255331		MGARP	mitochondria localized glutamic acid rich protein	0.241	0.00658
A_24_P173754	D	C1orf21	chromosome 1 open reading frame 21	0.221	0.00661
A_21_P0014529		MTHFD1	methylenetetrahydrofolate dehydrogenase (NADP+ dependent) 1, methenyltetrahydrofolate cyclohydrolase, formyltetrahydrofolate synthetase	0.164	0.00662
A_23_P432034		CCDC117	coiled-coil domain containing 117	0.116	0.00666
A_23_P162782		ARGLU1	arginine and glutamate rich 1	-0.151	0.00667
A_23_P4144		COASY	Coenzyme A synthase	0.1	0.00668
A_33_P3398401		CRBN	cereblon	0.12	0.00668
A_23_P156807		CFLAR	CASP8 and FADD like apoptosis regulator	-0.246	0.00669
A_33_P3226542	D	SNORD3B-1	small nucleolar RNA, C/D box 3B-1	-0.237	0.0067
A_33_P3340014		TRO	trophinin	0.241	0.0067
A_33_P3212650		HDDC2	HD domain containing 2	0.138	0.00671
A_23_P216017		ENTPD4	ectonucleoside triphosphate diphosphohydrolase 4	0.188	0.00672
A_21_P0012073				-0.439	0.00674
A_19_P00315668	D	HIPK2	homeodomain interacting protein kinase 2	-0.194	0.00675
A_33_P3290909		SMC1A	structural maintenance of chromosomes 1A	-0.158	0.00676
A_33_P3308263		DIRC2	disrupted in renal carcinoma 2	0.132	0.00679
A_23_P25674		CKB	creatine kinase, brain	0.21	0.0068
A_33_P3268838		CPEB1	cytoplasmic polyadenylation element binding protein 1	-0.174	0.00683
A_23_P387057	D	TUBB	tubulin beta class I	-0.132	0.00685
A_23_P146209		RNF170	ring finger protein 170	0.168	0.00687
A_33_P3243214	D	BORCS6	BLOC-1 related complex subunit 6	0.19	0.00688
A_23_P422724		PPIC	peptidylprolyl isomerase C	0.133	0.00689
A_23_P112412		TEX10	testis expressed 10	-0.092	0.00694
A_24_P217834		HIST1H3D	histone cluster 1, H3d	0.13	0.00694
A_19_P00801917				-0.182	0.00695
A_23_P130961		ELANE	elastase, neutrophil expressed	0.186	0.00697
A_23_P164047		MMD	monocyte to macrophage differentiation-associated	0.242	0.00698
A_23_P7679		NUP155	nucleoporin 155kDa	0.172	0.007
A_23_P70201		CHD1	chromodomain helicase DNA binding protein 1	-0.161	0.00701
A_23_P88559		LIPC	lipase, hepatic	0.237	0.00701
A_33_P3293573		VPS37D	vacuolar protein sorting 37 homolog D (S. cerevisiae)	0.105	0.00702
A_21_P0012995				-0.423	0.00706
A_33_P3358745		SEPP1	selenoprotein P, plasma, 1	0.174	0.00707
A_19_P00320729		CDYL2	chromodomain protein, Y-like 2	0.131	0.0071
A_24_P358205				-0.262	0.00711
A_24_P271363		CDS2	CDP-diacylglycerol synthase 2	0.133	0.00711
A_23_P300826		C6orf136	chromosome 6 open reading frame 136	0.136	0.00711
A_33_P3299865		HIST1H4K	histone cluster 1, H4k	0.121	0.00713
A_33_P3218584		POP5	POP5 homolog, ribonuclease P/MRP subunit	0.131	0.00713
A_24_P919452				0.162	0.00713
A_23_P76364		CD9	CD9 molecule	-0.233	0.00714
A_19_P00322228				-0.193	0.00718
A_23_P34835	D	LMNA	lamin A/C	-0.111	0.0072
A_23_P141680		BCAS3	breast carcinoma amplified sequence 3	0.194	0.0072
A_24_P238250		LGALS7/LGALS7B	lectin, galactoside-binding, soluble, 7	-0.546	0.00722
A_33_P3265290		RPL24	ribosomal protein L24	-0.102	0.00722
A_24_P129232		SERINC1	serine incorporator 1	0.146	0.00723
A_23_P56746		FAP	fibroblast activation protein alpha	-0.202	0.00725
A_23_P108932		RPL23AP32	ribosomal protein L23a pseudogene 32	-0.335	0.00726
A_23_P436281		HIST2H4B	histone cluster 2, H4b	0.111	0.00726
A_23_P6099		PLCB1	phospholipase C beta 1	-0.153	0.00728
A_23_P68868	D	TUG1	taurine up-regulated 1 (non-protein coding)	-0.129	0.00731
A_23_P209449		FZD7	frizzled class receptor 7	0.141	0.00731
A_23_P169092		CYP7B1	cytochrome P450 family 7 subfamily B member 1	0.153	0.00734
A_19_P00316844	D	HCG18	HLA complex group 18 (non-protein coding)	-0.187	0.00736
A_19_P00318883		APTR	Alu-mediated CDKN1A/p21 transcriptional regulator (non-protein coding)	0.175	0.00736
A_24_P410627		MKRN1	makorin ring finger protein 1	0.168	0.00737
A_24_P941625		ZNF70	zinc finger protein 70	0.188	0.00737
A_23_P148785		SFT2D2	SFT2 domain containing 2	0.198	0.00739
A_23_P9603		PRKDC	protein kinase, DNA-activated, catalytic polypeptide	-0.161	0.00744
A_33_P3327697		LOC145474	uncharacterized LOC145474	-0.295	0.00745
A_23_P63289		SSU72	SSU72 homolog, RNA polymerase II CTD phosphatase	0.096	0.00746
A_33_P3347291	D	INMT	indolethylamine N-methyltransferase	0.478	0.00747
A_23_P214139		REV3L	REV3 like, DNA directed polymerase zeta catalytic subunit	0.146	0.00748
A_23_P255672		ABLIM2	actin binding LIM protein family member 2	-0.253	0.00756
A_33_P3274562		SLC19A3	solute carrier family 19 (thiamine transporter), member 3	0.202	0.00759
A_24_P339153		SPNS1	spinster homolog 1 (Drosophila)	-0.118	0.0076
A_33_P3365002	D	TUBB2A	tubulin beta 2A class IIa	-0.162	0.00761
A_21_P0000037		ZSCAN12	zinc finger and SCAN domain containing 12	0.196	0.00762
A_23_P328069		HPS1	Hermansky-Pudlak syndrome 1	-0.144	0.00763
A_32_P934840		C8orf34	chromosome 8 open reading frame 34	0.227	0.00764
A_23_P82693		PABPC1	poly(A) binding protein, cytoplasmic 1	-0.12	0.00765
A_24_P68247		TRIM4	tripartite motif containing 4	0.248	0.00765
A_24_P146211		HIST1H2BD	histone cluster 1, H2bd	0.149	0.00766
A_23_P211878		FLNB	filamin B	-0.157	0.0077
A_24_P83379		WDFY3	WD repeat and FYVE domain containing 3	-0.144	0.00772
A_33_P3418838		TPD52	tumor protein D52	0.218	0.00773
A_23_P121396	D	DNAJC19	DnaJ heat shock protein family (Hsp40) member C19	0.126	0.00774
A_33_P3231297		CREG1	cellular repressor of E1A stimulated genes 1	0.146	0.00774
A_24_P56467		GMPR2	guanosine monophosphate reductase 2	0.136	0.00784
A_33_P3612740		USP48	ubiquitin specific peptidase 48	0.139	0.00787
A_23_P105691		GPRC5D	G protein-coupled receptor, class C, group 5, member D	0.183	0.00787
A_23_P258698		MANBA	mannosidase, beta A, lysosomal	0.115	0.00791
A_21_P0000238		SNORD12C	small nucleolar RNA, C/D box 12C	0.179	0.00791
A_23_P205875		SCAND2P	SCAN domain containing 2 pseudogene	0.285	0.00794
A_33_P3355230		LAIR1	leukocyte-associated immunoglobulin-like receptor 1	-0.339	0.00795
A_33_P3252612		CYP2W1	cytochrome P450 family 2 subfamily W member 1	-0.187	0.00795
A_33_P3238215		COBLL1	cordon-bleu WH2 repeat protein like 1	0.142	0.00795
A_23_P145935		EPHB6	EPH receptor B6	0.188	0.00796
A_23_P137173		TMSB15A	thymosin beta 15a	0.203	0.00796
A_23_P433016	D	FBLN1	fibulin 1	0.23	0.00796
A_21_P0011934		LINC00342	long intergenic non-protein coding RNA 342	-0.3	0.00798
A_23_P25224	D	YBX3	Y-box binding protein 3	-0.123	0.00798
A_33_P3225843	D	CCDC149	coiled-coil domain containing 149	-0.141	0.00799
A_23_P68486		FAM210B	family with sequence similarity 210 member B	0.121	0.00801
A_33_P3348494		PCID2	PCI domain containing 2	0.109	0.00802
A_21_P0010949		NUTM2B-AS1	NUTM2B antisense RNA 1	-0.437	0.00803
A_23_P34788		KIF2C	kinesin family member 2C	-0.153	0.00803
A_24_P67946		NUDT4	nudix hydrolase 4	0.145	0.00805
A_23_P64873	D	DCN	decorin	0.232	0.00805
A_23_P69586		FAT1	FAT atypical cadherin 1	-0.221	0.00806
A_21_P0000225		SNORD83B	small nucleolar RNA, C/D box 83B	0.237	0.00806
A_33_P3214027		SPECC1L	sperm antigen with calponin homology and coiled-coil domains 1-like	0.188	0.00808
A_33_P3416568				0.162	0.00809
A_24_P878388				-0.17	0.00812
A_33_P3408962		SCN8A	sodium channel, voltage gated, type VIII alpha subunit	-0.185	0.00815
A_23_P53193		SYTL2	synaptotagmin like 2	-0.273	0.00817
A_33_P3341474		ZBTB38	zinc finger and BTB domain containing 38	-0.181	0.00818
A_21_P0000808		UBL7-AS1	UBL7 antisense RNA 1 (head to head)	0.166	0.00821
A_23_P40847		CHST2	carbohydrate (N-acetylglucosamine-6-O) sulfotransferase 2	-0.209	0.00822
A_33_P3251342		CYP3A4	cytochrome P450 family 3 subfamily A member 4	-0.36	0.00823
A_23_P130376		PIEZO2	piezo-type mechanosensitive ion channel component 2	0.299	0.00823
A_33_P3368636				-0.174	0.00824
A_21_P0000399		SNORD114-2	small nucleolar RNA, C/D box 114-2	-0.225	0.00825
A_23_P414895		TTC17	tetratricopeptide repeat domain 17	-0.148	0.00826
A_23_P118749		DERL2	derlin 2	0.103	0.00826
A_23_P63847		SUPV3L1	Suv3 like RNA helicase	-0.158	0.00827
A_23_P162525		UTP20	UTP20 small subunit processome component	-0.237	0.00829
A_21_P0000244		SNORD16	small nucleolar RNA, C/D box 16	0.421	0.00829
A_23_P200710		PIK3C2B	phosphatidylinositol-4-phosphate 3-kinase catalytic subunit type 2 beta	0.153	0.0083
A_24_P327050		TRAPPC2L	trafficking protein particle complex 2-like	-0.122	0.00832
A_23_P167030		PTH1R	parathyroid hormone 1 receptor	0.266	0.00836
A_24_P201404		C11orf54	chromosome 11 open reading frame 54	0.144	0.00838
A_33_P3399114		CENPBD1P1	CENPB DNA-binding domains containing 1 pseudogene 1	0.119	0.00842
A_32_P189790		DKFZp779M0652	uncharacterized DKFZp779M0652	0.125	0.00843
A_23_P14804		TSPAN3	tetraspanin 3	0.163	0.00845
A_24_P208045		EDEM3	ER degradation enhancer, mannosidase alpha-like 3	0.103	0.00847
A_23_P93009		SRP19	signal recognition particle 19kDa	0.181	0.00847
A_21_P0010774				-0.282	0.00848
A_33_P3398697		PICK1	protein interacting with PRKCA 1	-0.112	0.00848
A_23_P382045		TULP4	tubby like protein 4	-0.145	0.00852
A_23_P67864		ADCY3	adenylate cyclase 3	0.164	0.00853
A_33_P3283713	D	ABHD14A	abhydrolase domain containing 14A	0.179	0.00854
A_23_P209320		PER2	period circadian clock 2	0.196	0.00855
A_33_P3249509		NFIC	nuclear factor I/C (CCAAT-binding transcription factor)	-0.138	0.00856
A_23_P154526		GRB14	growth factor receptor bound protein 14	0.274	0.00856
A_23_P66050		B3GNT9	UDP-GlcNAc:betaGal beta-1,3-N-acetylglucosaminyltransferase 9	0.105	0.0086
A_23_P101392		TMEM38A	transmembrane protein 38A	0.13	0.0086
A_23_P91910		PLSCR4	phospholipid scramblase 4	0.206	0.0086
A_33_P3309075		TBC1D8	TBC1 domain family member 8	-0.17	0.00861
A_24_P133253		KITLG	KIT ligand	-0.193	0.00862
A_33_P3708364		LOC644285	uncharacterized LOC644285	-0.126	0.00862
A_23_P31055		NUP43	nucleoporin 43kDa	0.098	0.00865
A_23_P111492		MOSPD3	motile sperm domain containing 3	0.133	0.00867
A_32_P117313		TRIQK	triple QxxK/R motif containing	0.117	0.00869
A_33_P3385842		CCDC7	coiled-coil domain containing 7	0.196	0.00869
A_24_P944458		INSIG2	insulin induced gene 2	0.14	0.0087
A_24_P160001	D	FKBP1A	FK506 binding protein 1A	-0.114	0.00871
A_24_P268676		BHLHE40	basic helix-loop-helix family member e40	-0.223	0.00872
A_23_P218131		INF2	inverted formin, FH2 and WH2 domain containing	-0.139	0.00873
A_33_P3353552	D	SLC48A1	solute carrier family 48 (heme transporter), member 1	0.113	0.00875
A_21_P0011015	D	LOC643733	caspase 4, apoptosis-related cysteine peptidase pseudogene	-0.12	0.00876
A_33_P3340224		JAZF1-AS1	JAZF1 antisense RNA 1	0.368	0.00878
A_33_P3329878		RNF216	ring finger protein 216	-0.117	0.0088
A_24_P349002		POM121/POM121C	POM121 transmembrane nucleoporin	-0.134	0.00881
A_23_P83634		ALOX12B	arachidonate 12-lipoxygenase, 12R type	0.161	0.00881
A_32_P41292		VDAC2	voltage dependent anion channel 2	-0.119	0.00885
A_24_P101391		YBX1	Y-box binding protein 1	-0.247	0.00886
A_21_P0014808				-0.175	0.00886
A_23_P4416		ZNF287	zinc finger protein 287	0.172	0.00889
A_21_P0010876		BMS1P6	BMS1, ribosome biogenesis factor pseudogene 6	-0.235	0.00893
A_23_P108437		FZD5	frizzled class receptor 5	0.139	0.00893
A_23_P2884		PIGH	phosphatidylinositol glycan anchor biosynthesis class H	0.122	0.00894
A_33_P3406927		ADPGK	ADP-dependent glucokinase	0.129	0.00894
A_21_P0000679		LINC01578	long intergenic non-protein coding RNA 1578	0.167	0.00894
A_19_P00319201	D	CCDC149	coiled-coil domain containing 149	-0.158	0.00896
A_33_P3306363				0.304	0.00896
A_23_P341275		POP1	POP1 homolog, ribonuclease P/MRP subunit	-0.177	0.00897
A_24_P121171		HINFP	histone H4 transcription factor	0.137	0.00897
A_23_P33723		CD163	CD163 molecule	-0.195	0.00898
A_33_P3274528		C9orf153	chromosome 9 open reading frame 153	-0.298	0.00903
A_32_P86739		CASC10	cancer susceptibility candidate 10	0.167	0.00904
A_32_P87013		CXCL8	chemokine (C-X-C motif) ligand 8	-0.304	0.00905
A_23_P118246		GINS2	GINS complex subunit 2 (Psf2 homolog)	-0.157	0.00905
A_21_P0013349		FLNC	filamin C	-0.167	0.00909
A_23_P139722		TNFRSF1A	tumor necrosis factor receptor superfamily member 1A	0.159	0.00911
A_23_P255884	D	GSN	gelsolin	0.283	0.00913
A_23_P132874		CMSS1	cms1 ribosomal small subunit homolog (yeast)	0.132	0.00914
A_23_P66715		PIGS	phosphatidylinositol glycan anchor biosynthesis class S	0.138	0.00914
A_21_P0002038				0.329	0.00914
A_33_P3327058		ARHGEF2	Rho/Rac guanine nucleotide exchange factor 2	0.174	0.00916
A_23_P77066		SNRPN	small nuclear ribonucleoprotein polypeptide N	0.117	0.00917
A_23_P46725		EPC1	enhancer of polycomb homolog 1 (Drosophila)	0.154	0.0092
A_32_P48615	D	LOC100128108	putative ubiquitin-conjugating enzyme E2Q2-like protein	-0.268	0.00924
A_33_P3373298		STAG3L4	stromal antigen 3-like 4 (pseudogene)	-0.171	0.00924
A_23_P71972		WWOX	WW domain containing oxidoreductase	0.173	0.00924
A_21_P0012564				-0.096	0.00927
A_21_P0000738		DPH6-AS1	DPH6 antisense RNA 1 (head to head)	0.173	0.00928
A_23_P39050		ZNF823	zinc finger protein 823	0.161	0.00934
A_23_P119102		VASP	vasodilator-stimulated phosphoprotein	-0.236	0.00936
A_23_P54079		OSGEP	O-sialoglycoprotein endopeptidase	-0.119	0.00938
A_33_P3294053		ANKRD39	ankyrin repeat domain 39	-0.148	0.00939
A_23_P203888		MMP19	matrix metallopeptidase 19	0.113	0.00941
A_33_P3278475		FOXN2	forkhead box N2	0.164	0.00941
A_33_P3315899				-0.398	0.00943
A_23_P76983		BBOF1	basal body orientation factor 1	0.138	0.00943
A_33_P3224595		OFD1	oral-facial-digital syndrome 1	-0.228	0.00944
A_24_P237757		ZMYM2	zinc finger, MYM-type 2	-0.341	0.00945
A_23_P45345		HTATSF1	HIV-1 Tat specific factor 1	0.099	0.00947
A_21_P0000641	D	LINC00959	long intergenic non-protein coding RNA 959	0.155	0.00948
A_33_P3522525		GRPEL1	GrpE-like 1, mitochondrial (E. coli)	-0.143	0.00949
A_33_P3354434		TRIM41	tripartite motif containing 41	0.124	0.00949
A_21_P0013986		GEMIN2P2	gem nuclear organelle associated protein 2 pseudogene 2	0.132	0.00952
A_23_P23924		CAPN2	calpain 2, (m/II) large subunit	-0.164	0.00953
A_24_P187023				-0.116	0.00953
A_24_P672240		FRMPD4	FERM and PDZ domain containing 4	-0.168	0.00954
A_23_P411953		PYGO2	pygopus family PHD finger 2	0.115	0.00954
A_33_P3308949		DBT	dihydrolipoamide branched chain transacylase E2	0.119	0.00957
A_23_P200310		DEPDC1	DEP domain containing 1	-0.189	0.00961
A_33_P3350488		NUSAP1	nucleolar and spindle associated protein 1	-0.153	0.00961
A_24_P98975		ANKRD13A	ankyrin repeat domain 13A	0.091	0.00962
A_33_P3232937		GNG12-AS1	GNG12 antisense RNA 1	-0.208	0.00964
A_33_P3302165		ABHD8	abhydrolase domain containing 8	0.136	0.00967
A_23_P90911		RDH14	retinol dehydrogenase 14 (all-trans/9-cis/11-cis)	0.147	0.00967
A_23_P410587		JADE1	jade family PHD finger 1	0.173	0.00968
A_24_P356130		MAP2K5	mitogen-activated protein kinase kinase 5	0.195	0.00971
A_23_P108823		OSBPL6	oxysterol binding protein like 6	-0.147	0.00972
A_23_P216434	D	ECM2	extracellular matrix protein 2, female organ and adipocyte specific	0.216	0.00975
A_33_P3413759		ACER2	alkaline ceramidase 2	0.237	0.00976
A_23_P164737		MED26	mediator complex subunit 26	0.108	0.00977
A_24_P328492		SOCS5	suppressor of cytokine signaling 5	-0.136	0.0098
A_33_P3262717		SAMD4B	sterile alpha motif domain containing 4B	0.171	0.0098
A_23_P209360		KLHL29	kelch like family member 29	0.107	0.00981
A_23_P149852		LZTS2	leucine zipper, putative tumor suppressor 2	0.109	0.00981
A_23_P65455		HAUS4	HAUS augmin like complex subunit 4	0.138	0.00983
A_24_P277747		CNPY3	canopy FGF signaling regulator 3	0.145	0.00983
A_21_P0005919				-0.486	0.00985
A_33_P3298455		LINC01521	long intergenic non-protein coding RNA 1521	0.195	0.00986
A_32_P198810		LOH12CR2	loss of heterozygosity, 12, chromosomal region 2 (non-protein coding)	0.214	0.00986
A_23_P200838		KMO	kynurenine 3-monooxygenase (kynurenine 3-hydroxylase)	-0.329	0.00988
A_23_P78571		COX6B2	cytochrome c oxidase subunit VIb polypeptide 2 (testis)	-0.355	0.00991
A_23_P360245		NUDCD2	NudC domain containing 2	0.15	0.00993
A_23_P98057		ZNF32	zinc finger protein 32	0.167	0.00993
A_23_P35148		TAF13	TATA-box binding protein associated factor 13	0.163	0.00994
A_33_P3293114		SRSF11	serine/arginine-rich splicing factor 11	-0.149	0.00995
A_33_P3318966		ETFBKMT	electron transfer flavoprotein beta subunit lysine methyltransferase	0.217	0.00996
A_23_P418373		BCL2L2	BCL2-like 2	0.11	0.00997
A_23_P412409		PRRC2C	proline-rich coiled-coil 2C	-0.126	0.00998
A_23_P81399		SQSTM1	sequestosome 1	-0.125	0.01
A_23_P101093		COPZ2	coatomer protein complex subunit zeta 2	0.089	0.01
A_23_P58983		TBC1D22B	TBC1 domain family member 22B	0.134	0.01
A_21_P0014747		LOC101927895	uncharacterized LOC101927895	0.184	0.01
A_23_P55251		ITGA3	integrin subunit alpha 3	-0.217	0.0101
A_23_P65967		SLC38A7	solute carrier family 38 member 7	-0.115	0.0101
A_23_P93750		LSM5	LSM5 homolog, U6 small nuclear RNA and mRNA degradation associated	0.11	0.0101
A_23_P136232	D	IMPAD1	inositol monophosphatase domain containing 1	0.113	0.0101
A_23_P305723		MIER1	mesoderm induction early response 1, transcriptional regulator	0.126	0.0101
A_23_P252541		RAB7B	RAB7B, member RAS oncogene family	0.144	0.0101
A_23_P136325		WIPF2	WAS/WASL interacting protein family member 2	0.165	0.0101
A_23_P160567		ZMYND12	zinc finger, MYND-type containing 12	0.207	0.0101
A_23_P61127		APOO	apolipoprotein O	-0.141	0.0102
A_23_P51202		ZNF436	zinc finger protein 436	0.133	0.0102
A_23_P152963	D	BORCS6	BLOC-1 related complex subunit 6	0.146	0.0102
A_24_P13285		PPP1R1A	protein phosphatase 1 regulatory inhibitor subunit 1A	0.161	0.0102
A_23_P1431		BMPR1A	bone morphogenetic protein receptor type IA	0.18	0.0102
A_23_P107465		KRT31	keratin 31, type I	-0.265	0.0103
A_33_P3383696		SPEG	SPEG complex locus	-0.216	0.0103
A_23_P76731	D	MOK	MOK protein kinase	-0.186	0.0103
A_23_P334870		TMEM217	transmembrane protein 217	-0.154	0.0103
A_23_P254415	D	RPSAP58	ribosomal protein SA pseudogene 58	-0.126	0.0103
A_24_P295806		CHID1	chitinase domain containing 1	0.096	0.0103
A_24_P365807		EFNB1	ephrin-B1	0.116	0.0103
A_33_P3233666		RPP30	ribonuclease P/MRP 30kDa subunit	0.12	0.0103
A_33_P3404531		ZCWPW1	zinc finger, CW type with PWWP domain 1	0.19	0.0103
A_33_P3342528		P2RY1	purinergic receptor P2Y, G-protein coupled, 1	0.214	0.0103
A_23_P27400	D	HAS1	hyaluronan synthase 1	-0.209	0.0104
A_21_P0010592		LOC100288069	uncharacterized LOC100288069	-0.174	0.0104
A_23_P310560		NUDT16	nudix hydrolase 16	0.132	0.0104
A_23_P36157		WDR74	WD repeat domain 74	-0.106	0.0105
A_23_P205575		GPR135	G protein-coupled receptor 135	-0.277	0.0106
A_33_P3728698				-0.173	0.0106
A_21_P0014389	D	ACTR3	ARP3 actin-related protein 3 homolog (yeast)	-0.102	0.0106
A_23_P335039		ZNF721	zinc finger protein 721	0.113	0.0106
A_21_P0013848		FOXN3	forkhead box N3	0.115	0.0106
A_32_P163125		SGMS1	sphingomyelin synthase 1	0.137	0.0106
A_23_P350045		REEP5	receptor accessory protein 5	0.142	0.0106
A_23_P252913		BBS7	Bardet-Biedl syndrome 7	0.168	0.0106
A_33_P3302696	D	PPM1D	protein phosphatase, Mg2+/Mn2+ dependent 1D	0.18	0.0106
A_23_P204782		MDM1	Mdm1 nuclear protein	0.22	0.0106
A_33_P3363515		XRCC3	X-ray repair complementing defective repair in Chinese hamster cells 3	-0.257	0.0107
A_33_P3240078				-0.244	0.0107
A_23_P122674		PAK1IP1	PAK1 interacting protein 1	-0.149	0.0107
A_23_P216894		MAPKAP1	mitogen-activated protein kinase associated protein 1	0.128	0.0107
A_23_P430161		EXOC8	exocyst complex component 8	0.133	0.0107
A_23_P431569		LOC100049716	uncharacterized LOC100049716	0.133	0.0107
A_33_P3315375		SLFN11	schlafen family member 11	0.141	0.0107
A_23_P157038		CNPY4	canopy FGF signaling regulator 4	0.158	0.0107
A_23_P149813		RSU1	Ras suppressor protein 1	0.168	0.0107
A_33_P3336257		IRX1	iroquois homeobox 1	0.178	0.0107
A_33_P3227880		BTN3A2	butyrophilin subfamily 3 member A2	0.187	0.0107
A_23_P104651		CDCA5	cell division cycle associated 5	-0.173	0.0108
A_33_P3385561				-0.331	0.0109
A_21_P0007928				-0.286	0.0109
A_21_P0009380				-0.27	0.0109
A_33_P3295200	D	HAS1	hyaluronan synthase 1	-0.218	0.0109
A_33_P3284453		SOGA3	SOGA family member 3	-0.217	0.0109
A_33_P3357149		FAM35A	family with sequence similarity 35 member A	-0.164	0.0109
A_33_P3259821		DOCK9	dedicator of cytokinesis 9	0.137	0.0109
A_24_P262407	D	THRA	thyroid hormone receptor, alpha	0.143	0.0109
A_21_P0001596				0.192	0.0109
A_24_P98249		TACC1	transforming, acidic coiled-coil containing protein 1	0.223	0.0109
A_33_P3236868		MT1X	metallothionein 1X	0.225	0.0109
A_23_P502047		CHRD	chordin	0.232	0.0109
A_33_P3293381	D	RASSF4	Ras association (RalGDS/AF-6) domain family member 4	0.262	0.0109
A_21_P0011431	D	HERC2	HECT and RLD domain containing E3 ubiquitin protein ligase 2	-0.22	0.011
A_33_P3231277		HIF1A	hypoxia inducible factor 1, alpha subunit (basic helix-loop-helix transcription factor)	-0.153	0.011
A_23_P169934		RILPL1	Rab interacting lysosomal protein-like 1	-0.101	0.011
A_33_P3302245		TMEM59L	transmembrane protein 59 like	0.134	0.011
A_24_P57528		SLC39A11	solute carrier family 39 member 11	0.169	0.011
A_23_P333228		MARCH4	membrane associated ring-CH-type finger 4	-0.232	0.0111
A_24_P191588		ALAS1	5'-aminolevulinate synthase 1	-0.197	0.0111
A_24_P118376		CEACAM20	carcinoembryonic antigen related cell adhesion molecule 20	-0.194	0.0111
A_33_P3349716		ZNF766	zinc finger protein 766	0.114	0.0111
A_23_P48099		NUP37	nucleoporin 37kDa	0.12	0.0111
A_23_P20463		RAD21	RAD21 cohesin complex component	0.167	0.0111
A_23_P311358		ZNF282	zinc finger protein 282	0.187	0.0111
A_33_P3233754		ZNF154	zinc finger protein 154	0.216	0.0111
A_33_P3305117				-0.375	0.0112
A_24_P95439		CARS	cysteinyl-tRNA synthetase	-0.162	0.0112
A_23_P350234		UBE2NL	ubiquitin conjugating enzyme E2N-like (gene/pseudogene)	-0.159	0.0112
A_23_P40782		COMMD2	COMM domain containing 2	0.17	0.0112
A_23_P86470		CH25H	cholesterol 25-hydroxylase	-0.153	0.0113
A_23_P105028		ATL3	atlastin GTPase 3	-0.133	0.0113
A_23_P114808		MECR	mitochondrial trans-2-enoyl-CoA reductase	-0.096	0.0113
A_33_P3273020		FKBP2	FK506 binding protein 2	0.118	0.0113
A_23_P340158		ISCU	iron-sulfur cluster assembly enzyme	0.131	0.0113
A_23_P312610		DNAJC4	DnaJ heat shock protein family (Hsp40) member C4	0.151	0.0113
A_32_P179740		ATXN7L1	ataxin 7-like 1	0.153	0.0113
A_33_P3323520		MSANTD4	Myb/SANT-like DNA-binding domain containing 4 with coiled-coils	0.176	0.0113
A_33_P3878772		JAK2	Janus kinase 2	0.192	0.0113
A_23_P171074		ITM2A	integral membrane protein 2A	0.303	0.0113
A_33_P3372526		MDH1B	malate dehydrogenase 1B	-0.291	0.0114
A_23_P215900		SCARA3	scavenger receptor class A member 3	-0.209	0.0114
A_21_P0013516				-0.161	0.0114
A_33_P3231888		C5orf15	chromosome 5 open reading frame 15	0.13	0.0114
A_32_P120043		FAM26E	family with sequence similarity 26 member E	0.154	0.0114
A_24_P381499	D	GLIPR1L2	GLI pathogenesis-related 1 like 2	0.227	0.0114
A_24_P235049		MTHFD1L	methylenetetrahydrofolate dehydrogenase (NADP+ dependent) 1-like	-0.233	0.0115
A_23_P39116		LIG1	ligase I, DNA, ATP-dependent	-0.138	0.0115
A_23_P399001		CXXC5	CXXC finger protein 5	-0.12	0.0115
A_23_P370625		SEPN1	selenoprotein N, 1	-0.12	0.0115
A_21_P0012884		LOC728613	programmed cell death 6 pseudogene	-0.118	0.0115
A_23_P97021		AGO3	argonaute 3, RISC catalytic component	-0.106	0.0115
A_23_P318300		ZAK	sterile alpha motif and leucine zipper containing kinase AZK	0.139	0.0115
A_24_P588897		SLCO3A1	solute carrier organic anion transporter family member 3A1	0.143	0.0115
A_33_P3270317		SLC18A3	solute carrier family 18 (vesicular acetylcholine transporter), member 3	-0.299	0.0116
A_33_P3315074				-0.193	0.0116
A_23_P128624		CARS2	cysteinyl-tRNA synthetase 2, mitochondrial (putative)	-0.149	0.0116
A_24_P116378		GCOM1	GRINL1A complex locus 1	0.141	0.0116
A_24_P371053		ORMDL1	ORMDL sphingolipid biosynthesis regulator 1	0.16	0.0116
A_23_P212050		BCHE	butyrylcholinesterase	0.401	0.0116
A_23_P113351		SPARCL1	SPARC like 1	0.53	0.0116
A_23_P165007		RASGRP4	RAS guanyl releasing protein 4	-0.319	0.0117
A_24_P413920		FAM84A	family with sequence similarity 84 member A	-0.163	0.0117
A_23_P69877		ZFP62	ZFP62 zinc finger protein	0.094	0.0117
A_23_P103414		YTHDF2	YTH N(6)-methyladenosine RNA binding protein 2	0.096	0.0117
A_23_P24633		THYN1	thymocyte nuclear protein 1	0.098	0.0117
A_33_P3319920		KDM4B	lysine (K)-specific demethylase 4B	0.113	0.0117
A_21_P0014079		C1orf61	chromosome 1 open reading frame 61	-0.511	0.0118
A_33_P3390057		TM4SF1	transmembrane 4 L six family member 1	-0.5	0.0118
A_21_P0002334				-0.294	0.0118
A_33_P3289236		HPR	haptoglobin-related protein	-0.194	0.0118
A_23_P215525		OSBPL3	oxysterol binding protein like 3	-0.157	0.0118
A_23_P63825		GOT1	glutamic-oxaloacetic transaminase 1, soluble	-0.153	0.0118
A_23_P58588		SLIT3	slit guidance ligand 3	0.141	0.0118
A_19_P00812033				-0.322	0.0119
A_19_P00319630				-0.258	0.0119
A_23_P51646		PLK3	polo-like kinase 3	-0.13	0.0119
A_23_P85209		IL13RA2	interleukin 13 receptor subunit alpha 2	-0.431	0.012
A_33_P3330991				-0.158	0.012
A_24_P681011	D	HIPK2	homeodomain interacting protein kinase 2	-0.148	0.012
A_23_P2474		COPS7A	COP9 signalosome subunit 7A	-0.114	0.012
A_32_P123088		TMED7-TICAM2	TMED7-TICAM2 readthrough	0.108	0.012
A_33_P3417880		NKAPL	NFKB activating protein like	0.163	0.012
A_33_P3418025		CTSO	cathepsin O	0.166	0.012
A_33_P3367396		FAM177B	family with sequence similarity 177 member B	-0.686	0.0121
A_33_P3271121				-0.211	0.0121
A_23_P259393		SFMBT1	Scm-like with four mbt domains 1	-0.196	0.0121
A_23_P150903		FAR2	fatty acyl-CoA reductase 2	-0.174	0.0121
A_21_P0008215		LOC101927712	uncharacterized LOC101927712	-0.111	0.0121
A_33_P3501900		ZNF582-AS1	ZNF582 antisense RNA 1 (head to head)	0.109	0.0121
A_23_P128613		KDELC1	KDEL motif containing 1	0.111	0.0121
A_24_P86993		JAM3	junctional adhesion molecule 3	0.124	0.0121
A_24_P354689		SPOCK1	sparc/osteonectin, cwcv and kazal-like domains proteoglycan (testican) 1	0.126	0.0121
A_33_P3376404		WDR13	WD repeat domain 13	0.158	0.0121
A_33_P3304678		LINC00654	long intergenic non-protein coding RNA 654	0.16	0.0121
A_23_P164284		CLDN7	claudin 7	0.203	0.0121
A_23_P78092		EVI2A	ecotropic viral integration site 2A	0.238	0.0121
A_23_P396666		TBC1D2B	TBC1 domain family member 2B	0.119	0.0122
A_33_P3362562		RPS6KB1	ribosomal protein S6 kinase, 70kDa, polypeptide 1	0.147	0.0122
A_33_P3417313		PYCRL	pyrroline-5-carboxylate reductase-like	0.152	0.0122
A_23_P71440		GOLGA7	golgin A7	0.167	0.0122
A_23_P343398		CCR7	chemokine (C-C motif) receptor 7	0.179	0.0122
A_23_P77669		ZNF821	zinc finger protein 821	0.184	0.0122
A_33_P3396389		IL1R1	interleukin 1 receptor, type I	0.212	0.0122
A_19_P00809119		CASC15	cancer susceptibility candidate 15 (non-protein coding)	-0.339	0.0123
A_33_P3233170				-0.22	0.0123
A_24_P307486				-0.134	0.0123
A_24_P278747		CCND2	cyclin D2	0.19	0.0123
A_23_P500501		FGFR3	fibroblast growth factor receptor 3	0.207	0.0123
A_21_P0003214				-0.35	0.0124
A_33_P3289218		AAK1	AP2 associated kinase 1	-0.18	0.0124
A_21_P0007068		LOC101929506	uncharacterized LOC101929506	-0.18	0.0124
A_23_P104563		CPT1A	carnitine palmitoyltransferase 1A (liver)	-0.14	0.0124
A_23_P111343		BCLAF1	BCL2-associated transcription factor 1	-0.128	0.0124
A_23_P41588		HARS2	histidyl-tRNA synthetase 2	-0.088	0.0124
A_23_P100602	D	TBCD	tubulin folding cofactor D	-0.087	0.0124
A_23_P36724		FBXL14	F-box and leucine-rich repeat protein 14	0.122	0.0124
A_23_P201605		DENND1B	DENN/MADD domain containing 1B	0.174	0.0124
A_21_P0014880				-0.275	0.0125
A_33_P3209522		SLFN5	schlafen family member 5	-0.227	0.0125
A_23_P252855		BRIX1	BRX1, biogenesis of ribosomes	0.138	0.0125
A_33_P3832852		HAUS2	HAUS augmin like complex subunit 2	0.143	0.0125
A_23_P216708		RFK	riboflavin kinase	0.143	0.0125
A_19_P00324604	D	C17orf51	chromosome 17 open reading frame 51	0.154	0.0125
A_33_P3323188		LOC728743	zinc finger protein pseudogene	0.182	0.0125
A_33_P3283601		LOC389033	placenta specific 9 pseudogene	0.223	0.0125
A_21_P0003325				-0.233	0.0126
A_33_P3395369		AMD1	adenosylmethionine decarboxylase 1	-0.149	0.0126
A_23_P132260		PES1	pescadillo ribosomal biogenesis factor 1	-0.124	0.0126
A_24_P390928		TRAPPC6A	trafficking protein particle complex 6A	0.115	0.0126
A_23_P251499		PCOLCE	procollagen C-endopeptidase enhancer	0.171	0.0126
A_23_P421379	D	IGF2	insulin like growth factor 2	0.258	0.0126
A_21_P0010684				-0.27	0.0127
A_23_P114466		TBL1Y	transducin (beta)-like 1, Y-linked	-0.157	0.0127
A_33_P3244347		PC	pyruvate carboxylase	0.086	0.0127
A_24_P269619		DECR1	2,4-dienoyl-CoA reductase 1, mitochondrial	0.14	0.0127
A_24_P416997		APOL3	apolipoprotein L3	0.188	0.0127
A_23_P401		CENPF	centromere protein F	-0.174	0.0128
A_21_P0013257		GS1-259H13.2	transmembrane protein 225-like	0.133	0.0128
A_23_P143713		APOBEC3G	apolipoprotein B mRNA editing enzyme, catalytic polypeptide-like 3G	0.164	0.0128
A_33_P3214597	D	RP9P	retinitis pigmentosa 9 pseudogene	0.195	0.0128
A_23_P82990		OGN	osteoglycin	0.328	0.0128
A_21_P0014288		ANKRD10-IT1	ANKRD10 intronic transcript 1	-0.215	0.0129
A_23_P52727		NAV2	neuron navigator 2	-0.115	0.0129
A_23_P325438		XPO6	exportin 6	-0.101	0.0129
A_32_P18159		LYRM7	LYR motif containing 7	0.171	0.0129
A_23_P136978		SRPX2	sushi-repeat containing protein, X-linked 2	0.182	0.0129
A_33_P3423365	D	GSN	gelsolin	0.316	0.0129
A_19_P00322190	D	RP9P	retinitis pigmentosa 9 pseudogene	-0.607	0.013
A_24_P9285		LMAN2	lectin, mannose-binding 2	0.114	0.013
A_33_P3301010		SPIRE1	spire-type actin nucleation factor 1	0.141	0.013
A_33_P3309110		ALOX12-AS1	ALOX12 antisense RNA 1	0.19	0.013
A_33_P3336462				0.261	0.013
A_24_P273413		EML4	echinoderm microtubule associated protein like 4	-0.198	0.0131
A_23_P385206		STX12	syntaxin 12	0.083	0.0131
A_19_P00320602	D	LINC00963	long intergenic non-protein coding RNA 963	0.165	0.0131
A_23_P207336		PPY	pancreatic polypeptide	-0.243	0.0132
A_33_P3364864	D	NAMPT	nicotinamide phosphoribosyltransferase	-0.216	0.0132
A_23_P100501		HMOX2	heme oxygenase 2	0.099	0.0132
A_23_P314115	D	BMI1	BMI1 proto-oncogene, polycomb ring finger	0.128	0.0132
A_19_P00322968	D	LINC00963	long intergenic non-protein coding RNA 963	0.144	0.0132
A_33_P3404959	D	C2orf68	chromosome 2 open reading frame 68	0.154	0.0132
A_24_P276791		LRRC42	leucine rich repeat containing 42	0.16	0.0132
A_33_P3238330		FAM151A	family with sequence similarity 151 member A	0.185	0.0132
A_23_P255896	D	TRABD2A	TraB domain containing 2A	0.192	0.0132
A_23_P203957		TMTC1	transmembrane and tetratricopeptide repeat containing 1	-0.199	0.0133
A_23_P142096		GPR32	G protein-coupled receptor 32	-0.195	0.0133
A_33_P3210965		TCTN1	tectonic family member 1	0.085	0.0133
A_33_P3377045	D	CDC37L1	cell division cycle 37-like 1	0.14	0.0133
A_24_P664939		CNBP	CCHC-type zinc finger, nucleic acid binding protein	0.144	0.0133
A_23_P353014		CACNA2D4	calcium channel, voltage-dependent, alpha 2/delta subunit 4	0.197	0.0133
A_24_P137522	D	USP53	ubiquitin specific peptidase 53	0.245	0.0133
A_24_P371425		ATRIP	ATR interacting protein	0.292	0.0133
A_33_P3328485		IKZF2	IKAROS family zinc finger 2	-0.211	0.0134
A_24_P178602		ZNF600	zinc finger protein 600	-0.151	0.0134
A_21_P0011341		NPM1	nucleophosmin (nucleolar phosphoprotein B23, numatrin)	-0.117	0.0134
A_23_P143569		DGCR6L	DiGeorge syndrome critical region gene 6-like	0.123	0.0134
A_23_P53162		STIM1	stromal interaction molecule 1	0.136	0.0134
A_23_P502371		PHF2	PHD finger protein 2	0.139	0.0134
A_23_P12363		ROR1	receptor tyrosine kinase-like orphan receptor 1	0.15	0.0134
A_33_P3300747	D	ADHFE1	alcohol dehydrogenase, iron containing 1	0.153	0.0134
A_21_P0003164				-0.258	0.0135
A_24_P366777		LOC100996763/NOTCH2NL	notch 2 N-terminal like	-0.209	0.0135
A_23_P141315		NLE1	notchless homolog 1 (Drosophila)	0.117	0.0135
A_23_P368126		AHCYL1	adenosylhomocysteinase like 1	0.13	0.0135
A_33_P3353520		RNF225	ring finger protein 225	0.193	0.0135
A_21_P0011383		UBE2Q2P2	ubiquitin conjugating enzyme E2Q family member 2 pseudogene 2	-0.17	0.0136
A_23_P301896		PRDM2	PR domain containing 2, with ZNF domain	0.137	0.0136
A_24_P296508		SLC43A2	solute carrier family 43 (amino acid system L transporter), member 2	0.155	0.0136
A_24_P142269		HIRIP3	HIRA interacting protein 3	0.156	0.0136
A_23_P125717		NAP1L3	nucleosome assembly protein 1-like 3	0.179	0.0136
A_33_P3216517		NEK6	NIMA related kinase 6	-0.192	0.0137
A_23_P350059		PFN1P2	profilin 1 pseudogene 2	-0.176	0.0137
A_24_P780052	D	RPSAP58	ribosomal protein SA pseudogene 58	-0.144	0.0137
A_24_P323114		ANXA2P3	annexin A2 pseudogene 3	-0.133	0.0137
A_33_P3248664		VARS	valyl-tRNA synthetase	-0.12	0.0137
A_33_P3280094		LRFN4	leucine rich repeat and fibronectin type III domain containing 4	-0.113	0.0137
A_23_P171143		TSPAN6	tetraspanin 6	0.186	0.0137
A_24_P68908		LOC344887	NmrA-like family domain containing 1 pseudogene	-0.235	0.0138
A_33_P3215788	D	ANKRD36	ankyrin repeat domain 36	-0.171	0.0138
A_33_P3391626				-0.095	0.0138
A_23_P134814		THAP1	THAP domain containing, apoptosis associated protein 1	0.109	0.0138
A_23_P214222		MARCKS	myristoylated alanine-rich protein kinase C substrate	0.199	0.0138
A_23_P24365		ANKRD49	ankyrin repeat domain 49	0.13	0.0139
A_24_P210637		CHST14	carbohydrate (N-acetylgalactosamine 4-0) sulfotransferase 14	0.153	0.0139
A_24_P268993		LEAP2	liver expressed antimicrobial peptide 2	0.24	0.0139
A_33_P3349469		ATAD3A	ATPase family, AAA domain containing 3A	-0.123	0.014
A_32_P44775		C9orf85	chromosome 9 open reading frame 85	-0.114	0.014
A_23_P27128		KLHL10	kelch like family member 10	0.166	0.014
A_23_P71855		C5	complement component 5	0.176	0.014
A_24_P127312				-0.265	0.0141
A_33_P3276713		HGF	hepatocyte growth factor (hepapoietin A; scatter factor)	-0.188	0.0141
A_24_P193582		DEF8	differentially expressed in FDCP 8 homolog (mouse)	-0.134	0.0141
A_23_P25873		WDHD1	WD repeat and HMG-box DNA binding protein 1	-0.127	0.0141
A_32_P234738		RPL21	ribosomal protein L21	-0.097	0.0141
A_23_P56654		MCEE	methylmalonyl-CoA epimerase	0.131	0.0141
A_21_P0005833		LOC101929398	uncharacterized LOC101929398	0.166	0.0141
A_33_P3211929		RCOR2	REST corepressor 2	0.24	0.0141
A_21_P0006309				0.345	0.0141
A_23_P102965		BCL2L13	BCL2 like 13	0.119	0.0142
A_23_P37560		PEX11A	peroxisomal biogenesis factor 11 alpha	0.147	0.0142
A_33_P3242733		PKDCC	protein kinase domain containing, cytoplasmic	0.194	0.0142
A_23_P56703	D	TRABD2A	TraB domain containing 2A	0.212	0.0142
A_23_P373568		FUZ	fuzzy planar cell polarity protein	0.103	0.0143
A_23_P166280				0.133	0.0143
A_23_P45294		FAM199X	family with sequence similarity 199, X-linked	0.138	0.0143
A_24_P227585		GPALPP1	GPALPP motifs containing 1	-0.092	0.0144
A_23_P97932		MSRB2	methionine sulfoxide reductase B2	0.089	0.0144
A_33_P3350074		SLC25A19	solute carrier family 25 (mitochondrial thiamine pyrophosphate carrier), member 19	0.104	0.0144
A_23_P3956		C1QTNF1	C1q and tumor necrosis factor related protein 1	0.175	0.0144
A_33_P3615922		CFAP69	cilia and flagella associated protein 69	0.198	0.0144
A_21_P0000203		ODF2	outer dense fiber of sperm tails 2	-0.174	0.0145
A_23_P128663		SACS	sacsin molecular chaperone	-0.167	0.0145
A_23_P31273		AMPH	amphiphysin	-0.162	0.0145
A_23_P49021		WDR61	WD repeat domain 61	0.092	0.0145
A_23_P6786	D	TRNT1	tRNA nucleotidyl transferase, CCA-adding, 1	0.121	0.0145
A_21_P0011414				-0.294	0.0146
A_23_P143958		RPL22L1	ribosomal protein L22 like 1	-0.227	0.0146
A_21_P0000013		TIMM8A	translocase of inner mitochondrial membrane 8 homolog A (yeast)	-0.197	0.0146
A_23_P259189		CLIC4	chloride intracellular channel 4	-0.132	0.0146
A_23_P27724		SEPW1	selenoprotein W, 1	-0.125	0.0146
A_33_P3239414				-0.122	0.0146
A_33_P3331588		ATAD3B	ATPase family, AAA domain containing 3B	-0.14	0.0147
A_23_P55190		EFTUD2	elongation factor Tu GTP binding domain containing 2	-0.105	0.0147
A_24_P466374		EYA3	EYA transcriptional coactivator and phosphatase 3	0.141	0.0147
A_33_P3245480	D	LINC00869	long intergenic non-protein coding RNA 869	0.162	0.0147
A_23_P30972		ASCC3	activating signal cointegrator 1 complex subunit 3	-0.139	0.0148
A_23_P112159		AGO2	argonaute 2, RISC catalytic component	-0.135	0.0148
A_23_P8582		FAM126A	family with sequence similarity 126 member A	-0.135	0.0148
A_24_P83808				0.087	0.0148
A_23_P170337		ALDH4A1	aldehyde dehydrogenase 4 family member A1	0.098	0.0148
A_21_P0012937		AACSP1	acetoacetyl-CoA synthetase pseudogene 1	0.142	0.0148
A_33_P3251685		PDP2	pyruvate dehyrogenase phosphatase catalytic subunit 2	0.192	0.0148
A_33_P3276997		MAP6	microtubule associated protein 6	0.211	0.0148
A_21_P0000464		SNORD123	small nucleolar RNA, C/D box 123	0.212	0.0148
A_33_P3241428		OBSL1	obscurin-like 1	0.214	0.0148
A_23_P357104		ANXA6	annexin A6	0.216	0.0148
A_24_P261734		SLC38A1	solute carrier family 38 member 1	-0.238	0.0149
A_23_P153692		XRCC1	X-ray repair complementing defective repair in Chinese hamster cells 1	0.093	0.0149
A_23_P14105		RCBTB2	regulator of chromosome condensation (RCC1) and BTB (POZ) domain containing protein 2	0.095	0.0149
A_24_P347624		SNURF	SNRPN upstream reading frame	0.095	0.0149
A_24_P128563		KPNA6	karyopherin alpha 6 (importin alpha 7)	0.107	0.0149
A_23_P151368		EEF1AKMT1	eukaryotic translation elongation factor 1 alpha lysine methyltransferase 1	0.124	0.0149
A_33_P3281191		NID1	nidogen 1	0.139	0.0149
A_24_P246692				-0.174	0.015
A_23_P88963		ALDOA	aldolase, fructose-bisphosphate A	-0.12	0.015
A_23_P312646		C9orf142	chromosome 9 open reading frame 142	0.102	0.015
A_33_P3288839		C14orf37	chromosome 14 open reading frame 37	0.169	0.015
A_21_P0003446		FLJ36777	uncharacterized LOC730971	0.222	0.015
A_23_P204286		MGP	matrix Gla protein	0.29	0.015
A_33_P3262191		CPNE7	copine VII	-0.244	0.0151
A_23_P112016	D	DLC1	DLC1 Rho GTPase activating protein	-0.149	0.0151
A_23_P154962		RIMBP3 (includes others)	RIMS binding protein 3	0.147	0.0151
A_21_P0013993		FAM104B	family with sequence similarity 104 member B	0.151	0.0151
A_21_P0000206		SNORD21	small nucleolar RNA, C/D box 21	0.206	0.0151
A_21_P0014431				0.23	0.0151
A_21_P0000262		SNORA27	small nucleolar RNA, H/ACA box 27	0.381	0.0151
A_33_P3328619				-0.258	0.0152
A_33_P3702364		SNX24	sorting nexin 24	-0.17	0.0152
A_23_P88470		TRPM7	transient receptor potential cation channel, subfamily M, member 7	-0.165	0.0152
A_23_P155257		FOXP1	forkhead box P1	0.084	0.0152
A_23_P431319		YIPF6	Yip1 domain family member 6	0.146	0.0152
A_23_P160968		LAMC2	laminin subunit gamma 2	0.184	0.0152
A_24_P155502		INHBC	inhibin beta C	-0.537	0.0153
A_21_P0002555				-0.217	0.0153
A_33_P3239569	D	RPS21	ribosomal protein S21	-0.172	0.0153
A_33_P3415191		ATP8B1	ATPase, aminophospholipid transporter, class I, type 8B, member 1	-0.143	0.0153
A_24_P409330		MRPL52	mitochondrial ribosomal protein L52	-0.092	0.0153
A_23_P345830		FASTKD2	FAST kinase domains 2	-0.087	0.0153
A_23_P500799		CASP6	caspase 6	0.114	0.0153
A_21_P0009120		LINC01569	long intergenic non-protein coding RNA 1569	0.153	0.0153
A_33_P3262789		REEP6	receptor accessory protein 6	-0.233	0.0154
A_33_P3325866	D	FBXL17	F-box and leucine-rich repeat protein 17	-0.214	0.0154
A_19_P00810085		LINC00607	long intergenic non-protein coding RNA 607	-0.166	0.0154
A_33_P3269740		FAM86B2/FAM86KP	family with sequence similarity 86 member B2	-0.111	0.0154
A_33_P3297921		MRPL37	mitochondrial ribosomal protein L37	-0.091	0.0154
A_23_P250994		ANAPC10	anaphase promoting complex subunit 10	0.105	0.0154
A_33_P3361741		DNAJC15	DnaJ heat shock protein family (Hsp40) member C15	0.144	0.0154
A_24_P219552		NFE2L1	nuclear factor, erythroid 2 like 1	0.146	0.0154
A_21_P0014378		HKR1	HKR1, GLI-Kruppel zinc finger family member	0.155	0.0154
A_33_P3320272		TMEM79	transmembrane protein 79	0.16	0.0154
A_24_P126741				-0.265	0.0155
A_24_P34545		ING5	inhibitor of growth family member 5	-0.132	0.0155
A_21_P0014321		ATP2A1-AS1	ATP2A1 antisense RNA 1	0.116	0.0155
A_23_P84952		TFE3	transcription factor binding to IGHM enhancer 3	0.121	0.0155
A_24_P132787		RAB18	RAB18, member RAS oncogene family	0.142	0.0155
A_23_P342934		TLE3	transducin like enhancer of split 3	0.167	0.0155
A_23_P19291	D	TUBB2A	tubulin beta 2A class IIa	-0.156	0.0156
A_33_P3371320		BRE	brain and reproductive organ-expressed (TNFRSF1A modulator)	0.119	0.0156
A_21_P0010617				0.122	0.0156
A_23_P136012		FBXO8	F-box protein 8	0.125	0.0156
A_32_P5251		RARA	retinoic acid receptor, alpha	0.137	0.0156
A_33_P3257503		SVIL-AS1	SVIL antisense RNA 1	0.143	0.0156
A_23_P217009		C9orf24	chromosome 9 open reading frame 24	0.154	0.0156
A_33_P3356846		MTX3	metaxin 3	0.163	0.0156
A_33_P3289865		PLCL1	phospholipase C like 1	0.19	0.0156
A_24_P38276		FZD1	frizzled class receptor 1	0.118	0.0157
A_23_P22682		ARMCX1	armadillo repeat containing, X-linked 1	0.129	0.0157
A_23_P59616		GTF2IRD2/GTF2IRD2B	GTF2I repeat domain containing 2	0.138	0.0157
A_33_P3370848		ETV2	ets variant 2	0.199	0.0157
A_24_P945113		ACVRL1	activin A receptor type IL	0.258	0.0157
A_21_P0011387				-0.121	0.0158
A_23_P21363	D	AHNAK	AHNAK nucleoprotein	0.089	0.0158
A_23_P414978		NUDT14	nudix hydrolase 14	-0.173	0.0159
A_33_P3341716		SP4	Sp4 transcription factor	0.183	0.0159
A_23_P100499		ROGDI	rogdi homolog	0.251	0.0159
A_33_P3368750		PAQR5	progestin and adipoQ receptor family member V	-0.277	0.016
A_19_P00805705		HECTD4	HECT domain containing E3 ubiquitin protein ligase 4	-0.144	0.016
A_33_P3223121	D	HIPK2	homeodomain interacting protein kinase 2	-0.128	0.016
A_33_P3225587		NAA50	N(alpha)-acetyltransferase 50, NatE catalytic subunit	-0.083	0.016
A_24_P396720		PPP1CB	protein phosphatase 1, catalytic subunit, beta isozyme	0.109	0.016
A_23_P91430		PXMP4	peroxisomal membrane protein 4	0.138	0.016
A_33_P3237944		AP4M1	adaptor related protein complex 4 mu 1 subunit	0.158	0.016
A_32_P206899		DNAH2	dynein, axonemal, heavy chain 2	0.177	0.016
A_33_P3317317		KRTAP5-4	keratin associated protein 5-4	-0.396	0.0161
A_33_P3252491				-0.208	0.0161
A_21_P0014749				-0.137	0.0161
A_23_P157970		INVS	inversin	-0.099	0.0161
A_23_P362893		TEAD1	TEA domain transcription factor 1	-0.08	0.0161
A_33_P3326989	D	MOK	MOK protein kinase	-0.125	0.0162
A_23_P5089		ATP5D	ATP synthase, H+ transporting, mitochondrial F1 complex, delta subunit	-0.099	0.0162
A_23_P112634		SMIM14	small integral membrane protein 14	0.127	0.0162
A_19_P00808452		SHANK2	SH3 and multiple ankyrin repeat domains 2	0.319	0.0162
A_23_P8913		CA2	carbonic anhydrase II	-0.256	0.0163
A_23_P94552		TMEM2	transmembrane protein 2	-0.205	0.0163
A_23_P69521		CCNI	cyclin I	-0.095	0.0163
A_23_P37778		FHOD1	formin homology 2 domain containing 1	-0.094	0.0163
A_33_P3359268		HMG20B	high mobility group 20B	0.11	0.0163
A_33_P3245824		PQLC1	PQ loop repeat containing 1	0.115	0.0163
A_21_P0011840		LOC100507334	two pore channel 3 pseudogene	0.174	0.0163
A_21_P0013894				-0.225	0.0164
A_32_P116840	D	CTAGE5	CTAGE family member 5	-0.186	0.0164
A_23_P203790		OS9	osteosarcoma amplified 9, endoplasmic reticulum lectin	0.123	0.0164
A_23_P38468		TAX1BP3	Tax1 (human T-cell leukemia virus type I) binding protein 3	0.143	0.0164
A_23_P421011		KAZALD1	Kazal-type serine peptidase inhibitor domain 1	0.317	0.0164
A_33_P3385461		BRCC3	BRCA1/BRCA2-containing complex subunit 3	-0.194	0.0165
A_21_P0014623		SNHG21	small nucleolar RNA host gene 21	-0.138	0.0165
A_19_P00808668		WDR82	WD repeat domain 82	0.12	0.0165
A_21_P0009295				-0.222	0.0166
A_21_P0000181		CAMTA1	calmodulin binding transcription activator 1	0.101	0.0166
A_23_P74252		LINC00339	long intergenic non-protein coding RNA 339	0.144	0.0166
A_23_P83159		KLHL9	kelch like family member 9	0.149	0.0166
A_33_P3226237		ABI2	abl-interactor 2	-0.335	0.0167
A_21_P0014775				-0.244	0.0167
A_24_P275873	D	TBCD	tubulin folding cofactor D	-0.101	0.0167
A_33_P3610123		POLR1A	polymerase (RNA) I polypeptide A	-0.085	0.0167
A_23_P99172		CCDC77	coiled-coil domain containing 77	0.12	0.0167
A_23_P128641		USPL1	ubiquitin specific peptidase like 1	0.164	0.0167
A_24_P35478		PARD3	par-3 family cell polarity regulator	0.18	0.0167
A_23_P14769		FES	FES proto-oncogene, tyrosine kinase	0.182	0.0167
A_33_P3282261				0.206	0.0167
A_23_P18372		B3GNT5	UDP-GlcNAc:betaGal beta-1,3-N-acetylglucosaminyltransferase 5	-0.168	0.0168
A_33_P3392325		CDC16	cell division cycle 16	-0.082	0.0168
A_23_P140069		FBXL3	F-box and leucine-rich repeat protein 3	0.114	0.0168
A_23_P308632		CBARP	calcium channel, voltage-dependent, beta subunit associated regulatory protein	0.189	0.0168
A_23_P166616		AGTR1	angiotensin II receptor type 1	0.287	0.0168
A_23_P90601		STEAP3	STEAP3 metalloreductase	-0.216	0.0169
A_32_P175301		DENND3	DENN/MADD domain containing 3	-0.136	0.0169
A_23_P101707		PLIN3	perilipin 3	-0.097	0.0169
A_24_P57700		ZHX3	zinc fingers and homeoboxes 3	0.147	0.0169
A_23_P98167		UNC93B1	unc-93 homolog B1 (C. elegans)	0.196	0.0169
A_21_P0000745		TTN-AS1	TTN antisense RNA 1	-0.213	0.017
A_33_P3229789				-0.183	0.017
A_24_P368575		SLC4A7	solute carrier family 4, sodium bicarbonate cotransporter, member 7	-0.145	0.017
A_23_P406424		RHOC	ras homolog family member C	-0.109	0.017
A_23_P41066		RASSF1	Ras association (RalGDS/AF-6) domain family member 1	0.093	0.017
A_23_P252403		COMMD10	COMM domain containing 10	0.094	0.017
A_19_P00317128	D	LINC00963	long intergenic non-protein coding RNA 963	0.127	0.017
A_23_P125253		LDB2	LIM domain binding 2	0.153	0.017
A_23_P79999		ENTPD6	ectonucleoside triphosphate diphosphohydrolase 6 (putative)	-0.107	0.0171
A_23_P399078		TIMP3	TIMP metallopeptidase inhibitor 3	0.215	0.0171
A_23_P94397		OMD	osteomodulin	0.308	0.0171
A_33_P3342822		GXYLT1P3	glucoside xylosyltransferase 1 pseudogene 3	-0.157	0.0172
A_23_P64898		KLRG1	killer cell lectin like receptor G1	0.123	0.0172
A_24_P77681		PAIP1	poly(A) binding protein interacting protein 1	0.146	0.0172
A_24_P106910		PTCH1	patched 1	0.153	0.0172
A_21_P0014435		LOC100287728	uncharacterized LOC100287728	0.214	0.0172
A_19_P00318280	D	LOC100506860	uncharacterized LOC100506860	-0.255	0.0173
A_24_P187799		CPED1	cadherin-like and PC-esterase domain containing 1	-0.161	0.0173
A_33_P3335902		ARMCX6	armadillo repeat containing, X-linked 6	0.121	0.0173
A_33_P3232544				0.151	0.0173
A_24_P212127		ZNF33A	zinc finger protein 33A	0.164	0.0173
A_21_P0001464		LOC100506022	uncharacterized LOC100506022	0.192	0.0173
A_33_P3213149		TPTEP1	transmembrane phosphatase with tensin homology pseudogene 1	0.235	0.0173
A_21_P0009590				-0.23	0.0174
A_33_P3261648	D	ANKRD36B	ankyrin repeat domain 36B	-0.208	0.0174
A_23_P77593		VAC14	Vac14 homolog (S. cerevisiae)	-0.14	0.0174
A_23_P386942		DIRAS1	DIRAS family, GTP-binding RAS-like 1	-0.124	0.0174
A_33_P3422812		C7orf73	chromosome 7 open reading frame 73	0.134	0.0174
A_23_P57236		GGT7	gamma-glutamyltransferase 7	0.136	0.0174
A_23_P112004		LRRC6	leucine rich repeat containing 6	0.136	0.0174
A_33_P3378915		ARHGEF18	Rho/Rac guanine nucleotide exchange factor 18	0.167	0.0174
A_32_P167396		MED14OS	MED14 opposite strand	0.17	0.0174
A_33_P3332547		IQCJ-SCHIP1	IQCJ-SCHIP1 readthrough	-0.224	0.0175
A_21_P0003757				-0.202	0.0175
A_21_P0000591		SNORA70F	small nucleolar RNA, H/ACA box 70F	-0.136	0.0175
A_32_P206698		CKS1B	CDC28 protein kinase regulatory subunit 1B	0.116	0.0175
A_33_P3235905				-0.168	0.0176
A_23_P62115		TIMP1	TIMP metallopeptidase inhibitor 1	-0.153	0.0176
A_23_P90172		PPP1R15A	protein phosphatase 1 regulatory subunit 15A	-0.129	0.0176
A_33_P3214056	D	LINC00869	long intergenic non-protein coding RNA 869	0.088	0.0176
A_23_P104804		ZBTB16	zinc finger and BTB domain containing 16	0.101	0.0176
A_21_P0011338		LINC00933	long intergenic non-protein coding RNA 933	0.181	0.0176
A_33_P3357748	D	PVT1	Pvt1 oncogene (non-protein coding)	-0.204	0.0177
A_23_P137391		ENO1	enolase 1, (alpha)	-0.154	0.0177
A_23_P388168		RAB3B	RAB3B, member RAS oncogene family	-0.15	0.0177
A_23_P74042		ADGRL2	adhesion G protein-coupled receptor L2	-0.114	0.0177
A_21_P0011135		EIF4A1	eukaryotic translation initiation factor 4A1	-0.1	0.0177
A_33_P3298043		ABCC6	ATP binding cassette subfamily C member 6	0.215	0.0177
A_24_P42136		KRT18	keratin 18, type I	-0.387	0.0178
A_33_P3304312		CELF6	CUGBP, Elav-like family member 6	-0.214	0.0178
A_23_P391778		MACF1	microtubule-actin crosslinking factor 1	-0.157	0.0178
A_23_P58321		CCNA2	cyclin A2	-0.147	0.0178
A_33_P3298024	D	ABCC3	ATP binding cassette subfamily C member 3	-0.145	0.0178
A_23_P70127		TMED9	transmembrane p24 trafficking protein 9	0.109	0.0178
A_23_P37415		SECISBP2L	SECIS binding protein 2-like	0.122	0.0178
A_21_P0000308		SNORA9	small nucleolar RNA, H/ACA box 9	0.161	0.0178
A_23_P99226		SIRT4	sirtuin 4	0.162	0.0178
A_23_P112241		DNAJB5	DnaJ heat shock protein family (Hsp40) member B5	0.169	0.0178
A_33_P3333603	D	SMOC1	SPARC related modular calcium binding 1	0.198	0.0178
A_23_P379614		OIP5	Opa interacting protein 5	-0.168	0.0179
A_24_P296698	D	MAP2K3	mitogen-activated protein kinase kinase 3	-0.149	0.0179
A_24_P20032	D	RFX5	regulatory factor X5	0.103	0.0179
A_23_P110531		FST	follistatin	0.12	0.0179
A_23_P153037		ZNF624	zinc finger protein 624	0.177	0.0179
A_33_P3340847	D	CARD6	caspase recruitment domain family member 6	0.191	0.0179
A_24_P476086		KPNA5	karyopherin alpha 5 (importin alpha 6)	0.149	0.018
A_23_P50508		PLA2G4C	phospholipase A2 group IVC	0.158	0.018
A_21_P0002766				0.199	0.018
A_23_P413641		PREX1	phosphatidylinositol-3,4,5-trisphosphate-dependent Rac exchange factor 1	-0.262	0.0181
A_33_P3355743		GPATCH2	G-patch domain containing 2	-0.18	0.0181
A_23_P100127		CASC5	cancer susceptibility candidate 5	-0.157	0.0181
A_33_P3346098		TAOK2	TAO kinase 2	0.115	0.0181
A_33_P3348802		LOC105373849	uncharacterized LOC105373849	0.128	0.0181
A_23_P48803		TMOD2	tropomodulin 2	0.16	0.0181
A_33_P3320994		SYDE2	synapse defective 1, Rho GTPase, homolog 2 (C. elegans)	0.174	0.0181
A_33_P3351894		MIF-AS1	MIF antisense RNA 1	-0.168	0.0182
A_24_P15765		RPS7P5	ribosomal protein S7 pseudogene 5	-0.157	0.0182
A_23_P1819		OR8B8	olfactory receptor family 8 subfamily B member 8	-0.141	0.0182
A_33_P3365676		HACD3	3-hydroxyacyl-CoA dehydratase 3	0.111	0.0182
A_33_P3219785		SOWAHC	sosondowah ankyrin repeat domain family member C	0.127	0.0182
A_33_P3278868		HEATR5A	HEAT repeat containing 5A	0.187	0.0182
A_19_P00320056	D	HCG18	HLA complex group 18 (non-protein coding)	-0.121	0.0183
A_33_P3390823				-0.132	0.0184
A_33_P3414482		GOT2	glutamic-oxaloacetic transaminase 2	-0.125	0.0184
A_33_P3373375		CD81	CD81 molecule	0.101	0.0184
A_24_P70993		CD99	CD99 molecule	0.123	0.0184
A_23_P501435		CSRP2BP	CSRP2 binding protein	0.133	0.0184
A_24_P258051		MASTL	microtubule associated serine/threonine kinase like	-0.126	0.0185
A_24_P280803	D	RPS21	ribosomal protein S21	-0.126	0.0185
A_33_P3414058		MEN1	menin 1	0.118	0.0185
A_33_P3272593		CTPS2	CTP synthase 2	0.124	0.0185
A_21_P0000502		RNU11	RNA, U11 small nuclear	0.195	0.0185
A_21_P0003279				0.348	0.0185
A_24_P625382	D	YBX3	Y-box binding protein 3	-0.153	0.0186
A_23_P218463		SERTAD1	SERTA domain containing 1	0.096	0.0186
A_23_P148584		DOCK11	dedicator of cytokinesis 11	0.124	0.0186
A_33_P3267745		C9orf69	chromosome 9 open reading frame 69	0.161	0.0186
A_32_P212058		CEP19	centrosomal protein 19kDa	0.167	0.0186
A_33_P3321230		SLC18B1	solute carrier family 18, subfamily B, member 1	0.18	0.0186
A_23_P500271		IRF5	interferon regulatory factor 5	0.297	0.0186
A_24_P227211		KLC2	kinesin light chain 2	-0.279	0.0187
A_33_P3321275		KMT2C	lysine (K)-specific methyltransferase 2C	-0.174	0.0187
A_24_P639505		STX6	syntaxin 6	0.101	0.0187
A_23_P21324		TWIST2	twist family bHLH transcription factor 2	0.177	0.0187
A_19_P00804777		LINC00662	long intergenic non-protein coding RNA 662	-0.242	0.0188
A_24_P333326	D	CTAGE5	CTAGE family member 5	-0.149	0.0188
A_33_P3411397		SLC25A6	solute carrier family 25 (mitochondrial carrier; adenine nucleotide translocator), member 6	-0.124	0.0188
A_23_P153086		RBFA	ribosome binding factor A (putative)	-0.11	0.0188
A_33_P3414487		WBSCR22	Williams Beuren syndrome chromosome region 22	-0.098	0.0188
A_23_P255104		LHFPL2	lipoma HMGIC fusion partner-like 2	0.12	0.0188
A_23_P132793		MANF	mesencephalic astrocyte-derived neurotrophic factor	0.125	0.0188
A_23_P142187	D	HIF3A	hypoxia inducible factor 3, alpha subunit	0.224	0.0188
A_33_P3384562		PDLIM7	PDZ and LIM domain 7	-0.196	0.0189
A_33_P3372705		SRGAP2B	SLIT-ROBO Rho GTPase activating protein 2B	-0.116	0.0189
A_21_P0006675		LOC105378272	uncharacterized LOC105378272	0.126	0.0189
A_33_P3382162	D	RFX5	regulatory factor X5	0.135	0.0189
A_24_P208436		PDE1A	phosphodiesterase 1A	0.172	0.0189
A_24_P253003		WNT11	wingless-type MMTV integration site family member 11	0.248	0.0189

## Sheet: RNA BPS at 10 µM
ID	Duplication	Symbol	Gene Name	log2FC	Pvalue
A_33_P3244872		CEP350	centrosomal protein 350kDa	-0.39	1.42e-08
A_23_P217015		SET	SET nuclear proto-oncogene	-0.417	1.91e-08
A_33_P3802146	D	LINC00504		-0.411	1.25e-07
A_33_P3290909		SMC1A	structural maintenance of chromosomes 1A	-0.348	1.53e-07
A_33_P3567967		LOC55338	uncharacterized LOC55338	-0.453	1.69e-07
A_24_P943393	D	AHNAK	AHNAK nucleoprotein	-0.279	2.76e-07
A_23_P206760		HP	haptoglobin	-0.392	2.96e-07
A_32_P83465	D	NBPF15 (includes others)	neuroblastoma breakpoint family member 15	-0.407	3.22e-07
A_33_P3244998		ODF2L	outer dense fiber of sperm tails 2-like	-0.445	3.34e-07
A_33_P3268900		BNIP3L	BCL2/adenovirus E1B 19kDa interacting protein 3-like	-0.392	5.97e-07
A_33_P3390570		KMT2A	lysine (K)-specific methyltransferase 2A	-0.318	6.59e-07
A_23_P77103		SORD	sorbitol dehydrogenase	-0.297	7.49e-07
A_33_P3404097		PGM5P2	phosphoglucomutase 5 pseudogene 2	-0.466	9.4e-07
A_33_P3321657		HSPG2	heparan sulfate proteoglycan 2	-0.35	1.61e-06
A_19_P00316844	D	HCG18	HLA complex group 18 (non-protein coding)	-0.371	1.62e-06
A_33_P3228252				-0.473	1.78e-06
A_33_P3280044	D	ANKRD11	ankyrin repeat domain 11	-0.297	2.19e-06
A_33_P3503537		LOC285178	uncharacterized LOC285178	-0.337	2.7e-06
A_33_P3293114	D	SRSF11	serine/arginine-rich splicing factor 11	-0.317	3.33e-06
A_23_P372923		FGFR1	fibroblast growth factor receptor 1	-0.277	3.67e-06
A_33_P3226832		F3	coagulation factor III, tissue factor	0.288	3.84e-06
A_24_P2648	D	PTPN14	protein tyrosine phosphatase, non-receptor type 14	-0.269	5.07e-06
A_33_P3263523		C1orf35	chromosome 1 open reading frame 35	-0.297	6.94e-06
A_33_P3640690		ZEB1	zinc finger E-box binding homeobox 1	-0.285	6.96e-06
A_33_P3236267	D	LINC00504		-0.38	8.6e-06
A_23_P339053		C16orf52	chromosome 16 open reading frame 52	-0.226	8.62e-06
A_19_P00800681	D	PWAR6	Prader Willi/Angelman region RNA 6	-0.315	8.69e-06
A_21_P0006998				-0.374	1.02e-05
A_19_P00804777		LINC00662	long intergenic non-protein coding RNA 662	-0.412	1.1e-05
A_23_P92602		ABCA11P	ATP binding cassette subfamily A member 11, pseudogene	-0.4	1.23e-05
A_21_P0011938	D	ANKRD36B	ankyrin repeat domain 36B	-0.317	1.34e-05
A_33_P3382105				-0.308	1.34e-05
A_23_P214897		AKAP12	A-kinase anchoring protein 12	-0.35	1.57e-05
A_23_P256158		ADRA2C	adrenoceptor alpha 2C	-0.315	1.58e-05
A_23_P97795		ACBD5	acyl-CoA binding domain containing 5	-0.278	1.67e-05
A_33_P3789693				-0.642	1.68e-05
A_23_P307310		ACAN	aggrecan	-0.536	1.89e-05
A_33_P3305117				-0.421	1.9e-05
A_33_P3236030		ARHGAP24	Rho GTPase activating protein 24	-0.389	1.98e-05
A_21_P0014132				-0.237	1.98e-05
A_23_P104996		BEST1	bestrophin 1	0.243	2.48e-05
A_33_P3423700		LOC100131829	uncharacterized LOC100131829	-0.454	2.66e-05
A_33_P3304655	D	LTBP1	latent transforming growth factor beta binding protein 1	-0.364	2.71e-05
A_23_P42331		HMGA1	high mobility group AT-hook 1	-0.371	3.02e-05
A_33_P3325558		RABGAP1L	RAB GTPase activating protein 1-like	-0.449	3.38e-05
A_21_P0014729		POLR2J4	polymerase (RNA) II (DNA directed) polypeptide J4, pseudogene	-0.404	3.47e-05
A_19_P00320028	D	LINC01004	long intergenic non-protein coding RNA 1004	-0.418	3.59e-05
A_33_P3249509		NFIC	nuclear factor I/C (CCAAT-binding transcription factor)	-0.239	3.65e-05
A_33_P3762913	D	LINC01004	long intergenic non-protein coding RNA 1004	-0.409	3.77e-05
A_23_P426636	D	AHNAK	AHNAK nucleoprotein	-0.314	4.05e-05
A_23_P162874		HSP90AA1	heat shock protein 90kDa alpha family class A member 1	-0.229	4.07e-05
A_24_P681011	D	HIPK2	homeodomain interacting protein kinase 2	-0.311	4.43e-05
A_33_P3231542		ZFHX3	zinc finger homeobox 3	-0.254	5.02e-05
A_21_P0013548				-0.332	5.09e-05
A_24_P309645		TPCN1	two pore segment channel 1	-0.236	5.11e-05
A_21_P0002349				-0.36	5.18e-05
A_24_P16610		ZNRF1	zinc and ring finger 1, E3 ubiquitin protein ligase	-0.246	5.49e-05
A_19_P00803019	D	PWAR6	Prader Willi/Angelman region RNA 6	-0.326	5.62e-05
A_33_P3230876		ALG11	ALG11, alpha-1,2-mannosyltransferase	-0.236	5.93e-05
A_33_P3382147		STARD13	StAR related lipid transfer domain containing 13	-0.36	6.3e-05
A_33_P3324333		ANKRD20A5P	ankyrin repeat domain 20 family member A5, pseudogene	-0.368	6.53e-05
A_23_P301360		ZNF572	zinc finger protein 572	0.29	6.71e-05
A_33_P3274528		C9orf153	chromosome 9 open reading frame 153	-0.465	6.83e-05
A_33_P3278407		MLLT4	myeloid/lymphoid or mixed-lineage leukemia; translocated to, 4	-0.233	7.22e-05
A_33_P3273969		ZC3H11A	zinc finger CCCH-type containing 11A	-0.245	7.6e-05
A_33_P3522511				-0.414	7.62e-05
A_23_P259413		CDV3	CDV3 homolog (mouse)	0.187	7.65e-05
A_33_P3371752		EPS15	epidermal growth factor receptor pathway substrate 15	-0.314	7.7e-05
A_33_P3368186				-0.268	7.72e-05
A_33_P3243399		SLMAP	sarcolemma associated protein	-0.396	8.64e-05
A_23_P153964		INHBB	inhibin beta B	0.235	8.97e-05
A_33_P3349474				-0.338	9.01e-05
A_24_P323104		DIAPH1	diaphanous related formin 1	-0.195	9.42e-05
A_23_P126803		ARPC5	actin related protein 2/3 complex subunit 5	-0.279	9.62e-05
A_33_P3645805		LOC149401	uncharacterized LOC149401	-0.401	9.86e-05
A_33_P3390107		RNA18S5	RNA, 18S ribosomal 5	-0.684	9.92e-05
A_33_P3327697		LOC145474	uncharacterized LOC145474	-0.397	9.92e-05
A_23_P63209		HSD11B1	hydroxysteroid (11-beta) dehydrogenase 1	0.346	0.000106
A_33_P3503937		LOC284581	uncharacterized LOC284581	-0.502	0.000107
A_32_P2103				-0.199	0.000107
A_23_P108932		RPL23AP32	ribosomal protein L23a pseudogene 32	-0.414	0.000113
A_33_P3366124		KANTR	KDM5C adjacent non-coding transcript	-0.202	0.000114
A_21_P0003093				-0.271	0.00012
A_23_P336513		GEMIN5	gem nuclear organelle associated protein 5	-0.21	0.000121
A_33_P3559138				-0.341	0.000127
A_33_P3315763				-0.219	0.000129
A_21_P0011466				-0.374	0.000132
A_33_P3357658	D	HMGA2	high mobility group AT-hook 2	-0.405	0.00014
A_23_P398491		C15orf57	chromosome 15 open reading frame 57	-0.266	0.000141
A_33_P3280993	D	HCG18	HLA complex group 18 (non-protein coding)	-0.296	0.000143
A_19_P00318280	D	LOC100506860	uncharacterized LOC100506860	-0.351	0.000146
A_33_P3220445		SMAD5	SMAD family member 5	-0.227	0.000147
A_21_P0000400		SNORD114-3	small nucleolar RNA, C/D box 114-3	-0.305	0.00015
A_23_P332908		ZFC3H1	zinc finger, C3H1-type containing	-0.214	0.00015
A_33_P3767773		UBR4	ubiquitin protein ligase E3 component n-recognin 4	-0.222	0.000151
A_33_P3884230		NFIX	nuclear factor I/X (CCAAT-binding transcription factor)	-0.189	0.000159
A_24_P138022		FAM120A	family with sequence similarity 120A	-0.176	0.00016
A_33_P3252322	D	LOC729162	uncharacterized LOC729162	-0.275	0.000166
A_33_P3405285		GSG1	germ cell associated 1	-0.378	0.000169
A_23_P210131				-0.36	0.000173
A_23_P156807		CFLAR	CASP8 and FADD like apoptosis regulator	-0.294	0.000173
A_19_P00805840		ZNF37BP	zinc finger protein 37B, pseudogene	-0.209	0.000173
A_33_P3313595		CDK11B	cyclin-dependent kinase 11B	-0.245	0.000181
A_23_P128706		DYNC1H1	dynein, cytoplasmic 1, heavy chain 1	-0.182	0.000182
A_23_P342138	D	ADAMTSL1	ADAMTS like 1	-0.23	0.000185
A_33_P3385461		BRCC3	BRCA1/BRCA2-containing complex subunit 3	-0.265	0.000189
A_19_P00800555				-0.39	0.000192
A_33_P3240229		CREBBP	CREB binding protein	-0.194	0.000195
A_23_P43810	D	LTBP1	latent transforming growth factor beta binding protein 1	-0.292	0.0002
A_33_P3381827		OSBPL2	oxysterol binding protein like 2	-0.224	0.000201
A_23_P217009		C9orf24	chromosome 9 open reading frame 24	0.259	0.000202
A_21_P0011551				-0.229	0.000216
A_33_P3311403		MRVI1	murine retrovirus integration site 1 homolog	-0.153	0.000216
A_24_P179183		ANKRD12	ankyrin repeat domain 12	-0.186	0.00022
A_24_P323815	D	MYCBP2	MYC binding protein 2, E3 ubiquitin protein ligase	-0.26	0.000222
A_24_P289139	D	SH3KBP1	SH3-domain kinase binding protein 1	-0.27	0.000237
A_33_P3762918	D	LINC01004	long intergenic non-protein coding RNA 1004	-0.428	0.000243
A_23_P162782		ARGLU1	arginine and glutamate rich 1	-0.226	0.000247
A_23_P54447		LINC00597	long intergenic non-protein coding RNA 597	-0.444	0.000248
A_24_P306561		TCF25	transcription factor 25 (basic helix-loop-helix)	-0.185	0.000252
A_21_P0000222		SNORD46	small nucleolar RNA, C/D box 46	0.296	0.000252
A_23_P393620		TFPI2	tissue factor pathway inhibitor 2	-0.433	0.000257
A_24_P205130		FNBP1	formin binding protein 1	-0.166	0.000258
A_24_P158946		FGD4	FYVE, RhoGEF and PH domain containing 4	-0.237	0.000259
A_21_P0011496	D	CES1	carboxylesterase 1	0.256	0.000266
A_32_P10133		PRINS	psoriasis associated non-protein coding RNA induced by stress	-0.478	0.000269
A_33_P3342096		ZHX3	zinc fingers and homeoboxes 3	-0.295	0.000272
A_33_P3276455		KDM5B	lysine (K)-specific demethylase 5B	-0.237	0.000278
A_33_P3233170				-0.209	0.000278
A_33_P3290040		CPT1C	carnitine palmitoyltransferase 1C	-0.179	0.000279
A_23_P56404		EN1	engrailed homeobox 1	0.253	0.000284
A_24_P65507		STRA13	stimulated by retinoic acid 13	-0.186	0.000285
A_33_P3289236		HPR	haptoglobin-related protein	-0.34	0.000288
A_24_P349002		POM121/POM121C	POM121 transmembrane nucleoporin	-0.171	0.000295
A_19_P00315601				-0.317	0.000299
A_23_P365060		MDN1	midasin AAA ATPase 1	-0.275	0.000306
A_23_P134953	D	PLIN2	perilipin 2	0.212	0.000314
A_23_P12363		ROR1	receptor tyrosine kinase-like orphan receptor 1	0.145	0.000326
A_33_P3340254		KMT2D	lysine (K)-specific methyltransferase 2D	-0.262	0.000328
A_33_P3808996		SPATS2	spermatogenesis associated, serine rich 2	-0.233	0.000328
A_19_P00805705	D	HECTD4	HECT domain containing E3 ubiquitin protein ligase 4	-0.247	0.000334
A_33_P3279629		UCN2	urocortin 2	-0.351	0.000351
A_23_P8913		CA2	carbonic anhydrase II	-0.363	0.000358
A_32_P171181	D	NBPF15 (includes others)	neuroblastoma breakpoint family member 15	-0.251	0.000363
A_21_P0004805				-0.373	0.000366
A_24_P106910		PTCH1	patched 1	0.244	0.000371
A_33_P3310232		L2HGDH	L-2-hydroxyglutarate dehydrogenase	-0.373	0.00038
A_24_P932016	D	HUWE1	HECT, UBA and WWE domain containing 1, E3 ubiquitin protein ligase	-0.235	0.00038
A_33_P3238215		COBLL1	cordon-bleu WH2 repeat protein like 1	0.21	0.000404
A_19_P00325912	D	HCG18	HLA complex group 18 (non-protein coding)	-0.355	0.000412
A_32_P120604		SNX29	sorting nexin 29	-0.504	0.000421
A_23_P2920	D	SERPINA3	serpin peptidase inhibitor, clade A (alpha-1 antiproteinase, antitrypsin), member 3	0.247	0.000423
A_24_P282309		MYOF	myoferlin	-0.242	0.000427
A_23_P207666		USP32	ubiquitin specific peptidase 32	-0.172	0.000433
A_23_P391778		MACF1	microtubule-actin crosslinking factor 1	-0.192	0.000435
A_23_P390116		SPATA13	spermatogenesis associated 13	-0.313	0.000436
A_21_P0012995				-0.466	0.000452
A_33_P3422429		INADL	InaD-like (Drosophila)	-0.365	0.00046
A_23_P125717		NAP1L3	nucleosome assembly protein 1-like 3	0.265	0.000482
A_21_P0000500		SNORD86	small nucleolar RNA, C/D box 86	-0.252	0.00049
A_33_P3341722				-0.183	0.000491
A_33_P3314436		FBXL17	F-box and leucine-rich repeat protein 17	-0.305	0.0005
A_23_P371129		SLX4	SLX4 structure-specific endonuclease subunit	-0.169	0.000503
A_23_P89431		CCL2	chemokine (C-C motif) ligand 2	-0.24	0.000508
A_33_P3358158		CRYBB2P1	crystallin beta B2 pseudogene 1	-0.294	0.000526
A_33_P3308481		HYMAI	hydatidiform mole associated and imprinted (non-protein coding)	-0.325	0.000528
A_23_P111343		BCLAF1	BCL2-associated transcription factor 1	-0.215	0.000548
A_33_P3318852		TBC1D8B	TBC1 domain family member 8B	-0.261	0.000558
A_33_P3275959		SLC25A16	solute carrier family 25 (mitochondrial carrier), member 16	-0.3	0.000569
A_33_P3219720	D	ZNF248	zinc finger protein 248	-0.319	0.000598
A_23_P30972		ASCC3	activating signal cointegrator 1 complex subunit 3	-0.22	0.000609
A_24_P784765		CD59	CD59 molecule	-0.227	0.000625
A_23_P211878		FLNB	filamin B	-0.186	0.000633
A_33_P3233000				-0.333	0.000637
A_32_P59302		HIVEP3	human immunodeficiency virus type I enhancer binding protein 3	-0.243	0.000646
A_23_P414895		TTC17	tetratricopeptide repeat domain 17	-0.188	0.000651
A_33_P3415744	D	ANKRD36B	ankyrin repeat domain 36B	-0.361	0.00066
A_33_P3270109		LEO1	LEO1 homolog, Paf1/RNA polymerase II complex component	-0.24	0.000662
A_33_P3335030	D	ANKRD36	ankyrin repeat domain 36	-0.327	0.000672
A_23_P61881		ARIH2	ariadne RBR E3 ubiquitin protein ligase 2	-0.131	0.000689
A_23_P401904		PHF19	PHD finger protein 19	-0.233	0.000694
A_23_P160992		FMO4	flavin containing monooxygenase 4	0.26	0.000702
A_23_P115792		PLEKHA1	pleckstrin homology domain containing A1	-0.193	0.000721
A_23_P150693		FJX1	four jointed box 1	-0.2	0.000722
A_23_P218131		INF2	inverted formin, FH2 and WH2 domain containing	-0.206	0.00073
A_23_P6099		PLCB1	phospholipase C beta 1	-0.281	0.000731
A_21_P0013453	D	LINC-PINT	long intergenic non-protein coding RNA, p53 induced transcript	-0.313	0.000742
A_33_P3359683		IL16	interleukin 16	-0.441	0.000751
A_21_P0000351		SCARNA22	small Cajal body-specific RNA 22	-0.25	0.000752
A_21_P0005785				0.684	0.000759
A_23_P216038	D	PHF20L1	PHD finger protein 20-like 1	-0.276	0.000774
A_33_P3423270		TMEM40	transmembrane protein 40	-0.362	0.000777
A_23_P72138		MRPS22	mitochondrial ribosomal protein S22	0.136	0.000788
A_33_P3252612		CYP2W1	cytochrome P450 family 2 subfamily W member 1	-0.2	0.000806
A_24_P366777		LOC100996763/NOTCH2NL	notch 2 N-terminal like	-0.251	0.000808
A_33_P3307894				-0.234	0.000816
A_33_P3275255				-0.351	0.000822
A_23_P151459	D	MYCBP2	MYC binding protein 2, E3 ubiquitin protein ligase	-0.247	0.000827
A_24_P161293	D	NBPF15 (includes others)	neuroblastoma breakpoint family member 15	-0.287	0.00083
A_33_P3266165				-0.232	0.000839
A_23_P22119		PLEC	plectin	-0.28	0.000845
A_33_P3419835		FBXL19-AS1	FBXL19 antisense RNA 1 (head to head)	-0.22	0.000849
A_23_P156748		ANKS1A	ankyrin repeat and sterile alpha motif domain containing 1A	-0.164	0.000849
A_23_P96976		ZCCHC17	zinc finger, CCHC domain containing 17	-0.201	0.000863
A_33_P3210288		FUT6	fucosyltransferase 6	-0.206	0.000864
A_23_P124837		LRP1	LDL receptor related protein 1	-0.263	0.000876
A_21_P0013248				0.2	0.000879
A_33_P3256695		PRPF40A	pre-mRNA processing factor 40 homolog A	-0.317	0.000881
A_23_P4922		C19orf68	chromosome 19 open reading frame 68	-0.166	0.000881
A_33_P3363515		XRCC3	X-ray repair complementing defective repair in Chinese hamster cells 3	-0.225	0.000883
A_23_P88470		TRPM7	transient receptor potential cation channel, subfamily M, member 7	-0.273	0.000899
A_33_P3711318		LOC257152	uncharacterized LOC257152	-0.234	0.000902
A_21_P0011301		WHAMMP2	WAS protein homolog associated with actin, golgi membranes and microtubules pseudogene 2	-0.221	0.000908
A_33_P3209522		SLFN5	schlafen family member 5	-0.279	0.000909
A_33_P3347417		SPEN	spen family transcriptional repressor	-0.262	0.000915
A_21_P0009342	D	WFDC21P	WAP four-disulfide core domain 21, pseudogene	-0.273	0.000921
A_23_P170857		IL1RAP	interleukin 1 receptor accessory protein	0.193	0.000929
A_33_P3214665		MAP2	microtubule associated protein 2	-0.277	0.000933
A_32_P109522		ZUFSP	zinc finger with UFM1-specific peptidase domain	0.153	0.000937
A_32_P150891		DIAPH3	diaphanous related formin 3	-0.312	0.000946
A_23_P5983		PLTP	phospholipid transfer protein	0.205	0.000954
A_33_P3260605		CTNNAL1	catenin alpha-like 1	-0.357	0.000959
A_23_P40866		ZBTB20	zinc finger and BTB domain containing 20	-0.342	0.000961
A_33_P3234667		ZKSCAN1	zinc finger with KRAB and SCAN domains 1	-0.186	0.000968
A_23_P120270		MCFD2	multiple coagulation factor deficiency 2	-0.234	0.000979
A_23_P14389		ACIN1	apoptotic chromatin condensation inducer 1	-0.192	0.00098
A_33_P3290338		PARP1	poly(ADP-ribose) polymerase 1	-0.197	0.000985
A_23_P397293		LY6K	lymphocyte antigen 6 complex, locus K	-0.325	0.000988
A_23_P162355		HOXC5	homeobox C5	-0.254	0.000994
A_24_P324405	D	ANKRD11	ankyrin repeat domain 11	-0.275	0.00102
A_23_P216094		ASPH	aspartate beta-hydroxylase	-0.258	0.00102
A_24_P9883		AP5B1	adaptor related protein complex 5, beta 1 subunit	-0.256	0.00103
A_33_P3805090		FNIP2	folliculin interacting protein 2	0.212	0.00106
A_23_P96965		SYNC	syncoilin, intermediate filament protein	-0.155	0.00111
A_33_P3215277		TTBK2	tau tubulin kinase 2	-0.204	0.00112
A_33_P3366246		UGGT1	UDP-glucose glycoprotein glucosyltransferase 1	-0.178	0.00112
A_23_P252306		ID1	inhibitor of DNA binding 1, dominant negative helix-loop-helix protein	-0.354	0.00114
A_19_P00318715	D	LINC-PINT	long intergenic non-protein coding RNA, p53 induced transcript	-0.238	0.00114
A_23_P86470		CH25H	cholesterol 25-hydroxylase	-0.24	0.00115
A_33_P3219803	D	PTMA	prothymosin, alpha	-0.164	0.00115
A_23_P93046		EXOC3	exocyst complex component 3	-0.16	0.00115
A_21_P0012391		LOC101927056	uncharacterized LOC101927056	-0.349	0.00118
A_23_P389907		ATXN2	ataxin 2	-0.134	0.00121
A_32_P223189		SUMO1P3	SUMO1 pseudogene 3 (functional)	0.186	0.00121
A_33_P3237220		FBXO24	F-box protein 24	0.219	0.00121
A_23_P158880		STARD5	StAR related lipid transfer domain containing 5	0.241	0.00122
A_21_P0010724	D	LOC645166	lymphocyte-specific protein 1 pseudogene	-0.243	0.00127
A_19_P00323413	D	PTPN14	protein tyrosine phosphatase, non-receptor type 14	-0.178	0.00129
A_23_P128744		BDKRB1	bradykinin receptor B1	-0.419	0.0013
A_33_P3295550		TET1	tet methylcytosine dioxygenase 1	-0.209	0.0013
A_23_P203888		MMP19	matrix metallopeptidase 19	0.158	0.00131
A_33_P3266010		RIN1	Ras and Rab interactor 1	-0.191	0.00133
A_23_P259442		CPE	carboxypeptidase E	0.236	0.00133
A_33_P3239267		FAM212A	family with sequence similarity 212 member A	-0.264	0.00134
A_33_P3328619				-0.243	0.00135
A_23_P132644		NCEH1	neutral cholesterol ester hydrolase 1	-0.211	0.00136
A_24_P101391		YBX1	Y-box binding protein 1	-0.285	0.00137
A_33_P3281283		S1PR3	sphingosine-1-phosphate receptor 3	-0.212	0.00138
A_23_P255104		LHFPL2	lipoma HMGIC fusion partner-like 2	0.185	0.00138
A_21_P0014003	D	DST	dystonin	-0.276	0.00139
A_33_P3210218		GALNT1	polypeptide N-acetylgalactosaminyltransferase 1	-0.222	0.0014
A_24_P83379		WDFY3	WD repeat and FYVE domain containing 3	-0.205	0.00142
A_23_P321452		PDZD8	PDZ domain containing 8	-0.236	0.00144
A_23_P100196		USP10	ubiquitin specific peptidase 10	-0.149	0.00144
A_23_P258944		DNAJB9	DnaJ heat shock protein family (Hsp40) member B9	0.189	0.00146
A_33_P3334292		PPIAL4G (includes others)	peptidylprolyl isomerase A like 4G	-0.517	0.00149
A_33_P3257523		ZNF451	zinc finger protein 451	-0.203	0.00152
A_32_P375286		ZNF660	zinc finger protein 660	-0.194	0.00152
A_33_P3410831		LOC729609	uncharacterized LOC729609	-0.281	0.00155
A_33_P3628409		PKI55	DKFZp434H1419	-0.255	0.00155
A_19_P00809728	D	LINC00630	long intergenic non-protein coding RNA 630	-0.255	0.00155
A_23_P34788		KIF2C	kinesin family member 2C	-0.222	0.00155
A_33_P3223121	D	HIPK2	homeodomain interacting protein kinase 2	-0.203	0.00156
A_24_P38815		TPP1	tripeptidyl peptidase I	0.174	0.00156
A_32_P135336		LOC388242	SAGA complex associated factor 29 pseudogene	-0.202	0.00157
A_21_P0011431	D	HERC2	HECT and RLD domain containing E3 ubiquitin protein ligase 2	-0.296	0.00158
A_33_P3321577		BAZ1B	bromodomain adjacent to zinc finger domain 1B	-0.152	0.00158
A_33_P3310961		ADD3-AS1	ADD3 antisense RNA 1	-0.284	0.00159
A_21_P0011931		KMT2C	lysine (K)-specific methyltransferase 2C	-0.251	0.00161
A_33_P3230548		KIF14	kinesin family member 14	-0.265	0.00164
A_33_P3284763		DMD	dystrophin	0.372	0.00164
A_23_P143958		RPL22L1	ribosomal protein L22 like 1	-0.268	0.00166
A_21_P0012674				0.177	0.00168
A_33_P3326772		LAMTOR4	late endosomal/lysosomal adaptor, MAPK and MTOR activator 4	-0.13	0.00169
A_33_P3489646		SPI1	Spi-1 proto-oncogene	-0.316	0.0017
A_33_P3310293		PKIG	protein kinase (cAMP-dependent, catalytic) inhibitor gamma	-0.202	0.00174
A_23_P424878		ARHGAP39	Rho GTPase activating protein 39	0.188	0.00174
A_24_P3140		ZNF638	zinc finger protein 638	-0.187	0.00175
A_33_P3248759		WDR24	WD repeat domain 24	-0.164	0.00175
A_24_P192727		KAZALD1	Kazal-type serine peptidase inhibitor domain 1	-0.382	0.00176
A_21_P0010592		LOC100288069	uncharacterized LOC100288069	-0.242	0.00178
A_33_P3335177		SFRP4	secreted frizzled-related protein 4	0.222	0.00178
A_32_P19806		DNAH11	dynein, axonemal, heavy chain 11	-0.213	0.00179
A_33_P3419339		GNAI3	guanine nucleotide binding protein (G protein), alpha inhibiting activity polypeptide 3	-0.189	0.00179
A_21_P0014699	D	ZNF528-AS1	ZNF528 antisense RNA 1	0.254	0.00179
A_24_P255218		MYO5A	myosin VA	-0.265	0.00181
A_33_P3403708				-0.278	0.00183
A_33_P3231695		ZNF667	zinc finger protein 667	-0.187	0.00183
A_23_P336992		ZFAND2A	zinc finger, AN1-type domain 2A	0.211	0.00183
A_24_P162287		CEP250	centrosomal protein 250kDa	-0.241	0.00184
A_33_P3217230		ZNF91	zinc finger protein 91	-0.219	0.00184
A_33_P3280796		LMO7	LIM domain 7	-0.251	0.00185
A_19_P00317856		LOC101928156	uncharacterized LOC101928156	-0.231	0.00185
A_33_P3849600		HSP90AA2P	heat shock protein 90kDa alpha family class A member 2, pseudogene	-0.206	0.00186
A_23_P85015		MAOB	monoamine oxidase B	0.214	0.00186
A_21_P0011910		CHORDC1	cysteine and histidine rich domain containing 1	-0.211	0.00188
A_24_P268160		DRAM2	DNA damage regulated autophagy modulator 2	0.15	0.0019
A_19_P00315603				-0.288	0.00191
A_33_P3280066		PTRF	polymerase I and transcript release factor	-0.248	0.00191
A_19_P00320842		C17orf51	chromosome 17 open reading frame 51	0.235	0.00191
A_23_P82868		PLAT	plasminogen activator, tissue type	-0.151	0.00193
A_24_P56884		TMEM199	transmembrane protein 199	0.139	0.00193
A_21_P0008390				-0.22	0.00195
A_24_P390928		TRAPPC6A	trafficking protein particle complex 6A	0.139	0.00195
A_33_P3349414		ZBTB43	zinc finger and BTB domain containing 43	-0.149	0.00196
A_33_P3242493		PIBF1	progesterone immunomodulatory binding factor 1	-0.237	0.00198
A_33_P3406493		GABBR2	gamma-aminobutyric acid (GABA) B receptor, 2	-0.374	0.002
A_23_P124190		TRIM34	tripartite motif containing 34	-0.258	0.002
A_32_P129950		NHLRC3	NHL repeat containing 3	0.211	0.00209
A_19_P00323737	D	PTPN14	protein tyrosine phosphatase, non-receptor type 14	-0.166	0.00211
A_23_P317056		MT-ND6	NADH dehydrogenase, subunit 6 (complex I)	0.284	0.00211
A_21_P0011335		EFL1	elongation factor like GTPase 1	-0.249	0.00212
A_23_P70359		AGPAT4-IT1	AGPAT4 intronic transcript 1	-0.269	0.00213
A_33_P3237977		LARP6	La ribonucleoprotein domain family member 6	-0.194	0.00215
A_24_P194886		EHBP1	EH domain binding protein 1	-0.191	0.00217
A_33_P3310533		DNAJC21	DnaJ heat shock protein family (Hsp40) member C21	-0.156	0.00217
A_33_P3375809		LOC729970	hCG2028352-like	0.228	0.00217
A_24_P693321		LOC100190986	uncharacterized LOC100190986	-0.435	0.00218
A_19_P00801585				-0.34	0.00219
A_19_P00320796		TUG1	taurine up-regulated 1 (non-protein coding)	-0.164	0.00219
A_33_P3245168		FAM71F2	family with sequence similarity 71 member F2	-0.289	0.0022
A_23_P70307	D	SMOC2	SPARC related modular calcium binding 2	0.244	0.00221
A_23_P320242		KIAA1324L	KIAA1324-like	0.327	0.00221
A_23_P138105		MED18	mediator complex subunit 18	0.204	0.00226
A_23_P259272		WSB2	WD repeat and SOCS box containing 2	0.139	0.00227
A_23_P88184		BTBD7	BTB (POZ) domain containing 7	-0.242	0.00229
A_23_P104438		MYPN	myopalladin	-0.238	0.0023
A_32_P225355		CPEB2	cytoplasmic polyadenylation element binding protein 2	-0.205	0.0023
A_21_P0000003		PRR4	proline rich 4 (lacrimal)	-0.201	0.00232
A_33_P3244026	D	MAVS	mitochondrial antiviral signaling protein	-0.174	0.00234
A_24_P104407		SYNM	synemin	0.225	0.00235
A_24_P100351		GNL3L	guanine nucleotide binding protein-like 3 (nucleolar)-like	-0.146	0.00236
A_24_P49383		AAMDC	adipogenesis associated, Mth938 domain containing	0.135	0.00237
A_19_P00320579	D	LINC-PINT	long intergenic non-protein coding RNA, p53 induced transcript	-0.269	0.00238
A_33_P3238177		ZNF37A	zinc finger protein 37A	-0.15	0.00238
A_23_P99063		LUM	lumican	0.213	0.00238
A_19_P00316340	D	LOC100506860	uncharacterized LOC100506860	-0.274	0.0024
A_33_P3368750		PAQR5	progestin and adipoQ receptor family member V	-0.392	0.00241
A_23_P112159		AGO2	argonaute 2, RISC catalytic component	-0.161	0.00241
A_23_P69521		CCNI	cyclin I	-0.12	0.00241
A_33_P3678883				-0.301	0.00243
A_33_P3362498		ATR	ATR serine/threonine kinase	-0.17	0.00244
A_23_P257043		GEM	GTP binding protein overexpressed in skeletal muscle	0.178	0.00244
A_21_P0010774				-0.345	0.00245
A_23_P362893		TEAD1	TEA domain transcription factor 1	-0.116	0.00246
A_23_P126266		HLX	H2.0-like homeobox	0.209	0.00246
A_19_P00317023		PVT1	Pvt1 oncogene (non-protein coding)	-0.331	0.00247
A_23_P146908		STX8	syntaxin 8	0.133	0.00248
A_23_P722		SYCP1	synaptonemal complex protein 1	0.375	0.00248
A_19_P00322977	D	LINC-PINT	long intergenic non-protein coding RNA, p53 induced transcript	-0.283	0.00251
A_21_P0002334				-0.278	0.00258
A_33_P3348887	D	PBX3	pre-B-cell leukemia homeobox 3	-0.251	0.00258
A_23_P170337		ALDH4A1	aldehyde dehydrogenase 4 family member A1	0.128	0.0026
A_23_P27128		KLHL10	kelch like family member 10	0.205	0.0026
A_24_P374634		STAU2	staufen double-stranded RNA binding protein 2	0.24	0.0026
A_23_P430161		EXOC8	exocyst complex component 8	0.173	0.00262
A_21_P0013100				0.206	0.00263
A_23_P314760		PRKAG2	protein kinase, AMP-activated, gamma 2 non-catalytic subunit	-0.201	0.00264
A_33_P3228325		SP100	SP100 nuclear antigen	-0.202	0.00265
A_33_P3224730		HMCN2	hemicentin 2	-0.213	0.00279
A_21_P0000635		NCAM1-AS1	NCAM1 antisense RNA1	-0.263	0.0028
A_19_P00319201		CCDC149	coiled-coil domain containing 149	-0.187	0.0028
A_32_P186474		RACGAP1	Rac GTPase activating protein 1	-0.162	0.00281
A_33_P3242909		ZNF563	zinc finger protein 563	-0.219	0.00282
A_23_P120125		COLEC11	collectin subfamily member 11	0.139	0.00286
A_33_P3216517		NEK6	NIMA related kinase 6	-0.282	0.00288
A_33_P3226167		FAM129B	family with sequence similarity 129 member B	-0.193	0.00289
A_32_P95462		STXBP5L	syntaxin binding protein 5 like	-0.207	0.00298
A_33_P3384442		LAMA5	laminin subunit alpha 5	-0.302	0.00299
A_23_P65830		HDDC3	HD domain containing 3	0.135	0.00301
A_33_P3352980				-0.394	0.00303
A_33_P3422258		C8orf59	chromosome 8 open reading frame 59	0.17	0.00303
A_23_P4161		ARSG	arylsulfatase G	0.287	0.00303
A_33_P3321678		RNF180	ring finger protein 180	-0.29	0.00305
A_33_P3296240		CNTLN	centlein	-0.222	0.00305
A_23_P81770		PTP4A1	protein tyrosine phosphatase type IVA, member 1	0.146	0.00305
A_33_P3298024		ABCC3	ATP binding cassette subfamily C member 3	-0.199	0.00306
A_23_P39542		C2orf76	chromosome 2 open reading frame 76	0.133	0.00308
A_19_P00322228				-0.207	0.00311
A_23_P500861		SYNE1	spectrin repeat containing, nuclear envelope 1	-0.204	0.00314
A_24_P184388		LRTOMT	leucine rich transmembrane and O-methyltransferase domain containing	0.146	0.00314
A_33_P3232980		MARK4	MAP/microtubule affinity-regulating kinase 4	0.26	0.00316
A_21_P0005248				0.345	0.00316
A_24_P303989		BMI1	BMI1 proto-oncogene, polycomb ring finger	-0.204	0.00318
A_23_P378690		TMEM64	transmembrane protein 64	0.234	0.00318
A_23_P7732		CETN3	centrin 3	0.174	0.00322
A_24_P276888		CENPO	centromere protein O	-0.227	0.00323
A_21_P0014496		LOC101927752	uncharacterized LOC101927752	0.156	0.00327
A_23_P371885		ARL17A/ARL17B	ADP ribosylation factor like GTPase 17A	-0.324	0.00329
A_23_P340890		THAP3	THAP domain containing, apoptosis associated protein 3	0.166	0.00329
A_23_P380881		ANKRD13B	ankyrin repeat domain 13B	0.291	0.0033
A_33_P3342807				-0.309	0.00332
A_21_P0000745		TTN-AS1	TTN antisense RNA 1	-0.276	0.00335
A_19_P00320047				-0.321	0.00338
A_32_P71113		SCAI	suppressor of cancer cell invasion	-0.182	0.00338
A_33_P3302015	D	ADAMTSL1	ADAMTS like 1	-0.18	0.00338
A_23_P34345		VCAM1	vascular cell adhesion molecule 1	0.242	0.00338
A_23_P341275		POP1	POP1 homolog, ribonuclease P/MRP subunit	-0.187	0.0034
[truncated: 663 more rows]

[truncated: 7 more sheets: RNA BPF at 10µM, miRNA BPA at 10 nM, miRNA BPS at 10 nM, miRNA BPF at 10 nM, miRNA BPA at 10 µM, miRNA BPS at 10 µM, miRNA BPF at 10 µM]
